# Supplementary material for: Enhancing Transcriptomics Insights into Neurological Disorders Through the Comparative Analysis of Shapley Values
Source: Preprints.org preprint supplement (doi:10.20944/preprints202410.1925.v1), 2024-10-25
Supplement: Supplementary file 1 [file supplementary]

## Sheet: GSE6575_0.05
source	term_name	term_id	highlighted	adjusted_p_value	negative_log10_of_adjusted_p_value	term_size	query_size	intersection_size	effective_domain_size	intersections
GO:MF	protein binding	GO:0005515	true	0.00177107	2.75176	14838	546	446	20212	1552263_AT 1553046_S_AT 1553177_AT 1553709_A_AT 1554351_A_AT 1554631_AT 1554678_S_AT 1555697_AT 1557910_AT 1560439_AT 1560445_X_AT 1567458_S_AT 1568704_A_AT 1569679_AT 200749_AT 200784_S_AT 200946_X_AT 201163_S_AT 201181_AT 201229_S_AT 201284_S_AT 201572_X_AT 201585_S_AT 201627_S_AT 201837_S_AT 201872_S_AT 201883_S_AT 201968_S_AT 202143_S_AT 202336_S_AT 202393_S_AT 202679_AT 202683_S_AT 202786_AT…
GO:BP	transport	GO:0006810	true	1.541e-05	4.8122	4350	533	166	21031	1552263_AT 1552863_A_AT 1567458_S_AT 1568704_A_AT 200698_AT 200749_AT 200784_S_AT 200946_X_AT 201627_S_AT 201872_S_AT 202679_AT 202783_AT 202786_AT 203073_AT 203211_S_AT 203333_AT 203544_S_AT 204426_AT 204491_AT 205099_S_AT 205212_S_AT 206398_S_AT 207035_AT 207840_AT 208451_S_AT 208732_AT 209018_S_AT 209186_AT 209404_S_AT 210293_S_AT 210446_AT 210676_X_AT 211953_S_AT 212297_AT 212486_S_AT 212887_…
GO:BP	anatomical structure development	GO:0048856	true	8.70332e-05	4.06031	5899	533	207	21031	1552263_AT 1554631_AT 1555697_AT 1557910_AT 1567458_S_AT 1568704_A_AT 1569679_AT 200749_AT 200784_S_AT 200946_X_AT 201163_S_AT 201229_S_AT 201627_S_AT 201883_S_AT 202393_S_AT 202679_AT 203132_AT 203211_S_AT 203333_AT 203603_S_AT 203816_AT 204426_AT 204491_AT 204731_AT 205099_S_AT 206398_S_AT 206657_S_AT 206828_AT 207840_AT 209018_S_AT 209128_S_AT 209186_AT 210446_AT 210691_S_AT 211597_S_AT 212070…
GO:BP	developmental process	GO:0032502	false	0.000100156	3.99932	6453	533	222	21031	1552263_AT 1554631_AT 1555697_AT 1557910_AT 1567458_S_AT 1568704_A_AT 1569679_AT 200749_AT 200784_S_AT 200946_X_AT 201163_S_AT 201229_S_AT 201627_S_AT 201883_S_AT 202393_S_AT 202679_AT 203132_AT 203211_S_AT 203333_AT 203603_S_AT 203816_AT 204426_AT 204491_AT 204731_AT 205099_S_AT 206398_S_AT 206657_S_AT 206828_AT 207079_S_AT 207840_AT 209018_S_AT 209128_S_AT 209186_AT 210446_AT 210691_S_AT 211597…
GO:BP	multicellular organism development	GO:0007275	false	0.00011085	3.95526	4643	533	171	21031	1552263_AT 1554631_AT 1567458_S_AT 1568704_A_AT 200749_AT 200784_S_AT 200946_X_AT 201163_S_AT 201627_S_AT 201883_S_AT 202393_S_AT 202679_AT 203132_AT 203211_S_AT 203333_AT 203603_S_AT 203816_AT 204426_AT 204731_AT 205099_S_AT 206657_S_AT 207840_AT 210446_AT 210691_S_AT 211597_S_AT 212070_AT 212378_AT 212486_S_AT 212784_AT 213918_S_AT 215424_S_AT 215894_AT 216645_AT 218235_S_AT 218247_S_AT 218368_…
GO:BP	system development	GO:0048731	false	0.000247328	3.60673	3973	533	150	21031	1552263_AT 1554631_AT 1567458_S_AT 1568704_A_AT 200749_AT 200784_S_AT 200946_X_AT 201627_S_AT 201883_S_AT 202679_AT 203132_AT 203211_S_AT 203333_AT 203603_S_AT 203816_AT 204426_AT 204731_AT 207840_AT 210446_AT 210691_S_AT 211597_S_AT 212070_AT 212378_AT 212486_S_AT 212784_AT 213918_S_AT 215424_S_AT 216645_AT 218235_S_AT 218247_S_AT 218368_S_AT 218394_AT 219279_AT 219594_AT 220684_AT 221021_S_AT 2…
GO:BP	establishment of localization	GO:0051234	false	0.000486302	3.31309	4881	533	175	21031	1552263_AT 1552863_A_AT 1554631_AT 1567458_S_AT 1568704_A_AT 200698_AT 200749_AT 200784_S_AT 200946_X_AT 201229_S_AT 201627_S_AT 201872_S_AT 202679_AT 202783_AT 202786_AT 203073_AT 203132_AT 203211_S_AT 203333_AT 203544_S_AT 204426_AT 204491_AT 205099_S_AT 205212_S_AT 206398_S_AT 207035_AT 207840_AT 208451_S_AT 208732_AT 209018_S_AT 209186_AT 209404_S_AT 210293_S_AT 210446_AT 210676_X_AT 211953_S…
GO:BP	cell differentiation	GO:0030154	false	0.00409249	2.38801	4366	533	156	21031	1552263_AT 1554631_AT 1557910_AT 1567458_S_AT 200749_AT 200784_S_AT 201229_S_AT 201627_S_AT 201883_S_AT 202393_S_AT 202679_AT 203132_AT 203211_S_AT 203333_AT 203603_S_AT 203816_AT 204491_AT 204731_AT 205099_S_AT 206398_S_AT 206657_S_AT 209018_S_AT 209128_S_AT 209186_AT 210446_AT 211597_S_AT 211698_AT 212070_AT 212486_S_AT 213906_AT 213918_S_AT 215047_AT 215424_S_AT 216645_AT 217499_X_AT 217840_AT…
GO:BP	cellular developmental process	GO:0048869	false	0.00414998	2.38195	4367	533	156	21031	1552263_AT 1554631_AT 1557910_AT 1567458_S_AT 200749_AT 200784_S_AT 201229_S_AT 201627_S_AT 201883_S_AT 202393_S_AT 202679_AT 203132_AT 203211_S_AT 203333_AT 203603_S_AT 203816_AT 204491_AT 204731_AT 205099_S_AT 206398_S_AT 206657_S_AT 209018_S_AT 209128_S_AT 209186_AT 210446_AT 211597_S_AT 211698_AT 212070_AT 212486_S_AT 213906_AT 213918_S_AT 215047_AT 215424_S_AT 216645_AT 217499_X_AT 217840_AT…
GO:BP	monoatomic ion transport	GO:0006811	false	0.0045726	2.33984	1256	533	60	21031	1552863_A_AT 1568704_A_AT 202783_AT 202786_AT 204491_AT 205099_S_AT 206398_S_AT 207035_AT 209186_AT 212297_AT 212486_S_AT 214567_S_AT 218989_X_AT 219176_AT 219529_AT 236539_AT 239464_AT 239467_AT 241918_AT 1552296_AT 1553004_AT 1553388_AT 1553402_A_AT 1554593_S_AT 1558387_AT 1558612_A_AT 1559923_AT 1569956_AT 203863_AT 204273_AT 204464_S_AT 206456_AT 206577_AT 207254_AT 207308_AT 207362_AT 207870…
GO:BP	establishment of localization in cell	GO:0051649	false	0.00720067	2.14263	1972	533	83	21031	1552263_AT 1554631_AT 200698_AT 200749_AT 200784_S_AT 201627_S_AT 201872_S_AT 202679_AT 203132_AT 203211_S_AT 203333_AT 203544_S_AT 204426_AT 207035_AT 207840_AT 208732_AT 209018_S_AT 209186_AT 209404_S_AT 210293_S_AT 210446_AT 210676_X_AT 211953_S_AT 212887_AT 215047_AT 215894_AT 218092_S_AT 218172_S_AT 218256_S_AT 218282_AT 219176_AT 219559_AT 220757_S_AT 221423_S_AT 221522_AT 221568_S_AT 22213…
GO:BP	metal ion transport	GO:0030001	false	0.00729213	2.13715	877	533	46	21031	1552863_A_AT 1568704_A_AT 202786_AT 204491_AT 205099_S_AT 206398_S_AT 207035_AT 209186_AT 212486_S_AT 214567_S_AT 218989_X_AT 219176_AT 236539_AT 239464_AT 239467_AT 1553004_AT 1553402_A_AT 1558387_AT 1558612_A_AT 1569956_AT 203863_AT 204273_AT 204464_S_AT 206577_AT 207362_AT 207870_AT 209956_S_AT 210738_S_AT 210853_AT 211427_S_AT 215014_AT 215878_AT 217522_AT 217705_AT 220503_AT 222967_AT 227481…
GO:BP	vesicle-mediated transport	GO:0016192	false	0.00814002	2.08937	1547	533	69	21031	1552263_AT 1567458_S_AT 200698_AT 200784_S_AT 201627_S_AT 202679_AT 203073_AT 203211_S_AT 203544_S_AT 204426_AT 205099_S_AT 207840_AT 208451_S_AT 208732_AT 209018_S_AT 209186_AT 209404_S_AT 210293_S_AT 210446_AT 212486_S_AT 212887_AT 215894_AT 220757_S_AT 221141_X_AT 221423_S_AT 221522_AT 221568_S_AT 222294_S_AT 222730_S_AT 222977_AT 223021_X_AT 223446_S_AT 224699_S_AT 225460_AT 227095_AT 227366_…
GO:BP	cell development	GO:0048468	false	0.00863408	2.06378	2819	533	109	21031	1552263_AT 1554631_AT 1567458_S_AT 200749_AT 200784_S_AT 201229_S_AT 201883_S_AT 202393_S_AT 203132_AT 203211_S_AT 203333_AT 203603_S_AT 203816_AT 204491_AT 204731_AT 205099_S_AT 206398_S_AT 206657_S_AT 209018_S_AT 209128_S_AT 209186_AT 210446_AT 212486_S_AT 215047_AT 215424_S_AT 216645_AT 218092_S_AT 218247_S_AT 218394_AT 219279_AT 219672_AT 220684_AT 221522_AT 221531_AT 223446_S_AT 224693_AT 22…
GO:BP	nervous system development	GO:0007399	false	0.00968106	2.01408	2531	533	100	21031	1552263_AT 1554631_AT 1567458_S_AT 1568704_A_AT 200749_AT 200784_S_AT 200946_X_AT 202679_AT 203132_AT 203211_S_AT 203333_AT 203603_S_AT 203816_AT 204426_AT 212070_AT 212378_AT 212486_S_AT 212784_AT 213918_S_AT 215424_S_AT 216645_AT 218235_S_AT 218394_AT 219279_AT 219594_AT 221522_AT 221956_AT 222730_S_AT 223446_S_AT 230464_AT 231776_AT 233333_X_AT 235240_AT 238105_X_AT 1552482_AT 1552878_AT 15540…
GO:BP	positive regulation of biological process	GO:0048518	false	0.012904	1.88928	6250	533	206	21031	1552263_AT 1552892_AT 1553177_AT 1554631_AT 1557910_AT 1567458_S_AT 1568704_A_AT 200749_AT 200784_S_AT 200946_X_AT 201181_AT 201229_S_AT 201585_S_AT 201837_S_AT 201883_S_AT 202143_S_AT 202393_S_AT 202783_AT 202786_AT 203132_AT 203211_S_AT 203333_AT 203544_S_AT 203603_S_AT 203777_S_AT 204178_S_AT 204426_AT 204491_AT 204731_AT 205061_S_AT 205099_S_AT 206361_AT 206398_S_AT 206657_S_AT 206828_AT 2070…
GO:BP	positive regulation of transport	GO:0051050	false	0.0141248	1.85002	844	533	44	21031	200749_AT 200784_S_AT 200946_X_AT 202786_AT 203211_S_AT 203544_S_AT 205099_S_AT 206398_S_AT 207035_AT 207840_AT 208451_S_AT 209018_S_AT 210446_AT 211953_S_AT 214567_S_AT 218282_AT 222294_S_AT 222730_S_AT 223446_S_AT 236539_AT 236988_X_AT 239467_AT 38340_AT 1552939_AT 1553402_A_AT 1563513_AT 1569956_AT 203863_AT 203998_S_AT 204052_S_AT 204464_S_AT 206577_AT 207870_AT 208048_AT 209908_S_AT 215152_A…
GO:BP	cell adhesion	GO:0007155	true	0.0142888	1.84501	1512	533	67	21031	1552892_AT 1554631_AT 1567458_S_AT 1569679_AT 201163_S_AT 201883_S_AT 203333_AT 205099_S_AT 207840_AT 209186_AT 210446_AT 212070_AT 212486_S_AT 212673_AT 214567_S_AT 217499_X_AT 218080_X_AT 218239_S_AT 218368_S_AT 219594_AT 220208_AT 220684_AT 222730_S_AT 223234_AT 235240_AT 236539_AT 236988_X_AT 238105_X_AT 239467_AT 1552754_A_AT 1552939_AT 1553004_AT 1553402_A_AT 1556329_A_AT 1556378_A_AT 15564…
GO:BP	localization	GO:0051179	false	0.0197481	1.70448	5520	533	185	21031	1552263_AT 1552863_A_AT 1554631_AT 1557910_AT 1567458_S_AT 1568704_A_AT 200698_AT 200749_AT 200784_S_AT 200946_X_AT 201229_S_AT 201627_S_AT 201837_S_AT 201872_S_AT 202679_AT 202783_AT 202786_AT 203073_AT 203132_AT 203211_S_AT 203333_AT 203544_S_AT 204426_AT 204491_AT 205099_S_AT 205212_S_AT 206398_S_AT 207035_AT 207840_AT 208451_S_AT 208732_AT 209018_S_AT 209186_AT 209404_S_AT 209890_AT 210293_S_…
GO:BP	regulation of transport	GO:0051049	false	0.0223879	1.64999	1594	533	69	21031	1552263_AT 1552863_A_AT 1567458_S_AT 200749_AT 200784_S_AT 200946_X_AT 201627_S_AT 202786_AT 203211_S_AT 203544_S_AT 204491_AT 205099_S_AT 206398_S_AT 207035_AT 207840_AT 208451_S_AT 209018_S_AT 209186_AT 210446_AT 211953_S_AT 212486_S_AT 214567_S_AT 215047_AT 218256_S_AT 218282_AT 221423_S_AT 221522_AT 222294_S_AT 222730_S_AT 222977_AT 223446_S_AT 236539_AT 236988_X_AT 239464_AT 239467_AT 38340_…
GO:BP	monoatomic cation transport	GO:0006812	false	0.0248444	1.60477	1033	533	50	21031	1552863_A_AT 1568704_A_AT 202783_AT 202786_AT 204491_AT 205099_S_AT 206398_S_AT 207035_AT 209186_AT 212297_AT 212486_S_AT 214567_S_AT 218989_X_AT 219176_AT 236539_AT 239464_AT 239467_AT 1553004_AT 1553388_AT 1553402_A_AT 1558387_AT 1558612_A_AT 1569956_AT 203863_AT 204273_AT 204464_S_AT 206577_AT 207254_AT 207362_AT 207870_AT 209956_S_AT 210738_S_AT 210853_AT 211427_S_AT 215014_AT 215878_AT 21752…
GO:BP	cell-cell signaling	GO:0007267	true	0.0318111	1.49742	1704	533	72	21031	1552263_AT 1557910_AT 1567458_S_AT 200784_S_AT 200946_X_AT 202393_S_AT 203211_S_AT 203603_S_AT 205099_S_AT 206187_AT 209018_S_AT 209186_AT 210446_AT 212070_AT 212486_S_AT 214567_S_AT 221428_S_AT 221519_AT 221531_AT 221568_S_AT 222730_S_AT 223234_AT 223446_S_AT 223836_AT 227228_S_AT 235240_AT 236988_X_AT 238105_X_AT 244804_AT 1553402_A_AT 1554512_A_AT 1554593_S_AT 1556499_S_AT 1559923_AT 1562372_A…
GO:BP	intracellular transport	GO:0046907	false	0.0346318	1.46053	1371	533	61	21031	1552263_AT 200698_AT 200749_AT 200784_S_AT 201627_S_AT 201872_S_AT 202679_AT 203211_S_AT 203333_AT 203544_S_AT 204426_AT 207035_AT 208732_AT 209018_S_AT 209186_AT 209404_S_AT 210293_S_AT 210676_X_AT 211953_S_AT 212887_AT 215047_AT 218092_S_AT 218172_S_AT 218256_S_AT 218282_AT 219559_AT 220757_S_AT 221423_S_AT 221522_AT 222132_S_AT 222730_S_AT 223021_X_AT 223180_S_AT 223446_S_AT 224623_AT 225460_A…
GO:CC	cytoplasm	GO:0005737	true	2.83681e-05	4.54717	12345	553	369	22097	1552263_AT 1553046_S_AT 1553177_AT 1553575_AT 1554351_A_AT 1554631_AT 1554678_S_AT 1555697_AT 1557910_AT 1560445_X_AT 1567458_S_AT 1568704_A_AT 200698_AT 200749_AT 200784_S_AT 200946_X_AT 201163_S_AT 201181_AT 201229_S_AT 201284_S_AT 201572_X_AT 201585_S_AT 201627_S_AT 201872_S_AT 201883_S_AT 201968_S_AT 202143_S_AT 202336_S_AT 202587_S_AT 202679_AT 202783_AT 202786_AT 203073_AT 203132_AT 203211_…
GO:CC	membrane	GO:0016020	true	0.00136751	2.86407	9864	553	299	22097	1552263_AT 1552863_A_AT 1552892_AT 1553046_S_AT 1553575_AT 1557910_AT 1560439_AT 1560445_X_AT 1567458_S_AT 1568704_A_AT 1569679_AT 200698_AT 200749_AT 200784_S_AT 201181_AT 201284_S_AT 201627_S_AT 201872_S_AT 201883_S_AT 202336_S_AT 202679_AT 202783_AT 202786_AT 203073_AT 203211_S_AT 203333_AT 203544_S_AT 204426_AT 204491_AT 204552_AT 204731_AT 205099_S_AT 205212_S_AT 206187_AT 206361_AT 206398_S…
GO:CC	vesicle	GO:0031982	true	0.00159734	2.7966	4004	553	142	22097	1552263_AT 1554631_AT 1555697_AT 1557910_AT 1567458_S_AT 200698_AT 200749_AT 200784_S_AT 201163_S_AT 201181_AT 201284_S_AT 201883_S_AT 201968_S_AT 202143_S_AT 202336_S_AT 202587_S_AT 202679_AT 203211_S_AT 203544_S_AT 204426_AT 204552_AT 204731_AT 205061_S_AT 205212_S_AT 205950_S_AT 206398_S_AT 207035_AT 208451_S_AT 208583_X_AT 208732_AT 208848_AT 209123_AT 209404_S_AT 209490_S_AT 210293_S_AT 2106…
GO:CC	transport vesicle	GO:0030133	false	0.00468193	2.32957	432	553	27	22097	200698_AT 202336_S_AT 203211_S_AT 204426_AT 207035_AT 209404_S_AT 210293_S_AT 212887_AT 218394_AT 218989_X_AT 219559_AT 221522_AT 222294_S_AT 222977_AT 223446_S_AT 232914_S_AT 235817_AT 1562372_AT 1563513_AT 203998_S_AT 211740_AT 222967_AT 232073_AT 236037_AT 236203_AT 241470_X_AT 242286_AT
GO:CC	cell periphery	GO:0071944	true	0.00732269	2.13533	6228	553	200	22097	1552263_AT 1552863_A_AT 1552892_AT 1557910_AT 1560439_AT 1560445_X_AT 1567458_S_AT 1569679_AT 200784_S_AT 201163_S_AT 201181_AT 201883_S_AT 202679_AT 202786_AT 203211_S_AT 203333_AT 204491_AT 204552_AT 204731_AT 205099_S_AT 206187_AT 206361_AT 206398_S_AT 206828_AT 207035_AT 207650_X_AT 207840_AT 208451_S_AT 209186_AT 209890_AT 212070_AT 212486_S_AT 214407_X_AT 214780_S_AT 215894_AT 217503_AT 217…
GO:CC	transport vesicle membrane	GO:0030658	false	0.00944537	2.02478	235	553	18	22097	202336_S_AT 204426_AT 207035_AT 209404_S_AT 210293_S_AT 212887_AT 218989_X_AT 219559_AT 223446_S_AT 235817_AT 1562372_AT 1563513_AT 203998_S_AT 211740_AT 222967_AT 236037_AT 236203_AT 241470_X_AT
GO:CC	cytoplasmic vesicle membrane	GO:0030659	false	0.0135359	1.86851	1226	553	54	22097	1567458_S_AT 200698_AT 200784_S_AT 201883_S_AT 202336_S_AT 202679_AT 203211_S_AT 203544_S_AT 204426_AT 204552_AT 205212_S_AT 207035_AT 209404_S_AT 210293_S_AT 212297_AT 212887_AT 218989_X_AT 219559_AT 220757_S_AT 221141_X_AT 221522_AT 222294_S_AT 222730_S_AT 222977_AT 223021_X_AT 223446_S_AT 227095_AT 227366_AT 230509_AT 235817_AT 236988_X_AT 238105_X_AT 239467_AT 38340_AT 1552393_AT 1552822_AT 1…
GO:CC	vesicle membrane	GO:0012506	false	0.0182832	1.73795	1240	553	54	22097	1567458_S_AT 200698_AT 200784_S_AT 201883_S_AT 202336_S_AT 202679_AT 203211_S_AT 203544_S_AT 204426_AT 204552_AT 205212_S_AT 207035_AT 209404_S_AT 210293_S_AT 212297_AT 212887_AT 218989_X_AT 219559_AT 220757_S_AT 221141_X_AT 221522_AT 222294_S_AT 222730_S_AT 222977_AT 223021_X_AT 223446_S_AT 227095_AT 227366_AT 230509_AT 235817_AT 236988_X_AT 238105_X_AT 239467_AT 38340_AT 1552393_AT 1552822_AT 1…
GO:CC	plasma membrane bounded cell projection	GO:0120025	true	0.0373065	1.42822	2277	553	85	22097	1552263_AT 1557910_AT 1567458_S_AT 200749_AT 201883_S_AT 202587_S_AT 203211_S_AT 203333_AT 206361_AT 207035_AT 208451_S_AT 209018_S_AT 212070_AT 212486_S_AT 214780_S_AT 218394_AT 219279_AT 220973_S_AT 221522_AT 222294_S_AT 223446_S_AT 226247_AT 227366_AT 230947_AT 233333_X_AT 235703_AT 239467_AT 244804_AT 33768_AT 38340_AT 77508_R_AT 1552482_AT 1552754_A_AT 1552878_AT 1552939_AT 1553004_AT 155451…
GO:CC	endomembrane system	GO:0012505	false	0.0427623	1.36894	4777	553	156	22097	1552263_AT 1553046_S_AT 1555697_AT 1557910_AT 1567458_S_AT 1568704_A_AT 200698_AT 200749_AT 200784_S_AT 200946_X_AT 201163_S_AT 201181_AT 201284_S_AT 201627_S_AT 201883_S_AT 201968_S_AT 202336_S_AT 202679_AT 203073_AT 203211_S_AT 203333_AT 203544_S_AT 204426_AT 204552_AT 205212_S_AT 207035_AT 208732_AT 209018_S_AT 209186_AT 209308_S_AT 209391_AT 209404_S_AT 209890_AT 210285_X_AT 210293_S_AT 21067…
GO:CC	cytosol	GO:0005829	false	0.0491068	1.30886	5487	553	175	22097	1552263_AT 1553177_AT 1554351_A_AT 1554631_AT 1554678_S_AT 1557910_AT 1560445_X_AT 1567458_S_AT 200749_AT 201284_S_AT 201572_X_AT 201585_S_AT 201872_S_AT 201968_S_AT 202143_S_AT 202587_S_AT 202786_AT 203132_AT 203211_S_AT 203333_AT 203544_S_AT 203603_S_AT 203816_AT 204187_AT 204491_AT 204552_AT 205061_S_AT 205950_S_AT 206187_AT 206828_AT 208532_X_AT 208732_AT 208848_AT 209018_S_AT 209063_X_AT 209…
REAC	Prostanoid ligand receptors	REAC:R-HSA-391908	false	0.04956	1.30487	9	337	4	10842	206187_AT 206361_AT 207650_X_AT 215894_AT
WP	Endothelin pathways	WP:WP2197	false	0.0128971	1.88951	33	267	7	8286	1552263_AT 206187_AT 209186_AT 1569956_AT 204273_AT 204464_S_AT 234996_AT
TF	Factor: DRI1; motif: AATTAA	TF:M01654	false	0.00107545	2.96841	10972	571	371	20045	1552263_AT 1553046_S_AT 1553575_AT 1554631_AT 1555697_AT 1557910_AT 1560439_AT 1560445_X_AT 1567458_S_AT 200698_AT 201163_S_AT 201181_AT 201229_S_AT 201837_S_AT 201872_S_AT 201968_S_AT 202143_S_AT 202336_S_AT 202783_AT 202786_AT 203073_AT 203132_AT 203211_S_AT 203544_S_AT 203603_S_AT 203777_S_AT 203816_AT 204178_S_AT 204187_AT 204426_AT 204491_AT 204552_AT 204731_AT 205061_S_AT 205099_S_AT 205212…
TF	Factor: Dlx-5; motif: AATTAN	TF:M03546	false	0.00107545	2.96841	10972	571	371	20045	1552263_AT 1553046_S_AT 1553575_AT 1554631_AT 1555697_AT 1557910_AT 1560439_AT 1560445_X_AT 1567458_S_AT 200698_AT 201163_S_AT 201181_AT 201229_S_AT 201837_S_AT 201872_S_AT 201968_S_AT 202143_S_AT 202336_S_AT 202783_AT 202786_AT 203073_AT 203132_AT 203211_S_AT 203544_S_AT 203603_S_AT 203777_S_AT 203816_AT 204178_S_AT 204187_AT 204426_AT 204491_AT 204552_AT 204731_AT 205061_S_AT 205099_S_AT 205212…
TF	Factor: HOXB6; motif: NTAATKRC	TF:M10693	false	0.00247406	2.60659	2365	571	107	20045	1553575_AT 1557910_AT 200698_AT 201229_S_AT 202336_S_AT 202786_AT 203211_S_AT 205099_S_AT 205212_S_AT 205950_S_AT 208583_X_AT 208911_S_AT 209128_S_AT 209404_S_AT 210022_AT 210691_S_AT 212231_AT 212378_AT 212887_AT 215047_AT 215905_S_AT 217499_X_AT 218092_S_AT 218282_AT 218394_AT 219276_X_AT 220646_S_AT 220789_S_AT 221141_X_AT 221423_S_AT 221568_S_AT 222697_S_AT 222824_AT 223176_AT 225391_AT 22546…
TF	Factor: GSX2; motif: NNYMATTANN; match class: 1	TF:M04328_1	false	0.00683752	2.1651	3855	571	155	20045	1553575_AT 1554631_AT 1557910_AT 201229_S_AT 201837_S_AT 202143_S_AT 202336_S_AT 202786_AT 203544_S_AT 204491_AT 205950_S_AT 206828_AT 208583_X_AT 208911_S_AT 209308_S_AT 209404_S_AT 209814_AT 210293_S_AT 210691_S_AT 211597_S_AT 211698_AT 212378_AT 215047_AT 215905_S_AT 217499_X_AT 218080_X_AT 218282_AT 218957_S_AT 219594_AT 220208_AT 220646_S_AT 220789_S_AT 221428_S_AT 221514_AT 221568_S_AT 2222…
TF	Factor: HoxA5; motif: NYMATTAN; match class: 1	TF:M10706_1	false	0.00789823	2.10247	2805	571	120	20045	1553575_AT 1554631_AT 1557910_AT 200698_AT 201229_S_AT 201837_S_AT 202143_S_AT 203211_S_AT 203544_S_AT 204491_AT 205950_S_AT 206828_AT 208583_X_AT 208911_S_AT 209404_S_AT 210022_AT 210293_S_AT 210691_S_AT 212231_AT 212378_AT 215047_AT 215905_S_AT 217499_X_AT 218282_AT 218394_AT 218957_S_AT 219594_AT 220789_S_AT 221141_X_AT 221568_S_AT 222294_S_AT 222697_S_AT 222824_AT 223176_AT 224689_AT 225391_A…
TF	Factor: HOXA6; motif: NGYMATTANN	TF:M10696	false	0.0150639	1.82206	4915	571	187	20045	1553575_AT 1554351_A_AT 1557910_AT 1560445_X_AT 200698_AT 201229_S_AT 201585_S_AT 202336_S_AT 202783_AT 202786_AT 203211_S_AT 203333_AT 203603_S_AT 204187_AT 205061_S_AT 205099_S_AT 205212_S_AT 205571_AT 205950_S_AT 206398_S_AT 207079_S_AT 208583_X_AT 208911_S_AT 209128_S_AT 209186_AT 209308_S_AT 209404_S_AT 209814_AT 210022_AT 210691_S_AT 212231_AT 212296_AT 212378_AT 212486_S_AT 212749_S_AT 212…
TF	Factor: LHX3; motif: ATTAAW; match class: 1	TF:M02097_1	false	0.0180247	1.74413	6559	571	237	20045	1552263_AT 1553575_AT 1553709_A_AT 201163_S_AT 201872_S_AT 202143_S_AT 202336_S_AT 202786_AT 203073_AT 203132_AT 203544_S_AT 203816_AT 204426_AT 204491_AT 204552_AT 205061_S_AT 205950_S_AT 206828_AT 207079_S_AT 208532_X_AT 208583_X_AT 208911_S_AT 209018_S_AT 209063_X_AT 209254_AT 209308_S_AT 209404_S_AT 209814_AT 210293_S_AT 211090_S_AT 211698_AT 212378_AT 212440_AT 212486_S_AT 212499_S_AT 212685…
TF	Factor: LHX3; motif: ATTAAW	TF:M02097	false	0.0333669	1.47668	11997	571	391	20045	1552263_AT 1553575_AT 1553709_A_AT 1554678_S_AT 1555697_AT 1557910_AT 1560439_AT 200784_S_AT 201163_S_AT 201181_AT 201229_S_AT 201572_X_AT 201837_S_AT 201872_S_AT 202143_S_AT 202336_S_AT 202679_AT 202786_AT 203073_AT 203132_AT 203211_S_AT 203333_AT 203544_S_AT 203816_AT 204178_S_AT 204426_AT 204491_AT 204552_AT 204731_AT 205061_S_AT 205571_AT 205950_S_AT 206187_AT 206398_S_AT 206828_AT 207079_S_A…
TF	Factor: ALX3; motif: NNYAATTANN	TF:M04279	false	0.0361929	1.44138	3936	571	154	20045	1553575_AT 1554631_AT 201229_S_AT 201837_S_AT 202143_S_AT 202336_S_AT 202786_AT 203544_S_AT 203603_S_AT 204491_AT 205950_S_AT 206828_AT 208583_X_AT 208911_S_AT 211090_S_AT 211597_S_AT 211698_AT 212296_AT 214407_X_AT 215047_AT 217499_X_AT 218282_AT 218394_AT 218840_S_AT 218957_S_AT 219594_AT 219672_AT 220789_S_AT 221021_S_AT 221428_S_AT 221568_S_AT 222294_S_AT 222977_AT 223176_AT 223180_S_AT 22383…
TF	Factor: HOXB6; motif: NTAATKRC	TF:M10691	false	0.0407727	1.38963	5313	571	197	20045	1553575_AT 1557910_AT 1560445_X_AT 200698_AT 201229_S_AT 201585_S_AT 202336_S_AT 202786_AT 203211_S_AT 203333_AT 203603_S_AT 204187_AT 205099_S_AT 205212_S_AT 205571_AT 205950_S_AT 206398_S_AT 207079_S_AT 208583_X_AT 208848_AT 208911_S_AT 209128_S_AT 209186_AT 209308_S_AT 209404_S_AT 210022_AT 210691_S_AT 211090_S_AT 211597_S_AT 212231_AT 212296_AT 212378_AT 212486_S_AT 212749_S_AT 212887_AT 2139…
TF	Factor: Dlx-5; motif: AATTAN; match class: 1	TF:M03546_1	false	0.0422236	1.37444	5870	571	214	20045	1553575_AT 1557910_AT 202143_S_AT 202336_S_AT 202786_AT 203073_AT 203211_S_AT 203544_S_AT 203816_AT 204178_S_AT 204426_AT 204491_AT 204552_AT 205950_S_AT 207079_S_AT 207840_AT 208532_X_AT 208583_X_AT 208848_AT 209057_X_AT 209063_X_AT 209123_AT 209128_S_AT 209254_AT 209308_S_AT 209404_S_AT 209814_AT 210293_S_AT 210691_S_AT 211090_S_AT 211597_S_AT 212231_AT 212296_AT 212378_AT 212499_S_AT 212887_AT…
TF	Factor: DRI1; motif: AATTAA; match class: 1	TF:M01654_1	false	0.0422236	1.37444	5870	571	214	20045	1553575_AT 1557910_AT 202143_S_AT 202336_S_AT 202786_AT 203073_AT 203211_S_AT 203544_S_AT 203816_AT 204178_S_AT 204426_AT 204491_AT 204552_AT 205950_S_AT 207079_S_AT 207840_AT 208532_X_AT 208583_X_AT 208848_AT 209057_X_AT 209063_X_AT 209123_AT 209128_S_AT 209254_AT 209308_S_AT 209404_S_AT 209814_AT 210293_S_AT 210691_S_AT 211090_S_AT 211597_S_AT 212231_AT 212296_AT 212378_AT 212499_S_AT 212887_AT…
TF	Factor: Hoxa9; motif: NTTAAWTAMA	TF:M07457	false	0.0470427	1.32751	4745	571	179	20045	1553575_AT 1555697_AT 1557910_AT 201229_S_AT 202143_S_AT 202783_AT 203132_AT 203777_S_AT 203816_AT 204552_AT 205061_S_AT 205950_S_AT 206361_AT 206398_S_AT 206828_AT 207840_AT 208532_X_AT 209018_S_AT 209057_X_AT 209063_X_AT 209254_AT 209308_S_AT 209404_S_AT 210691_S_AT 211698_AT 212378_AT 212499_S_AT 214407_X_AT 214567_S_AT 215047_AT 215905_S_AT 217499_X_AT 218025_S_AT 218239_S_AT 218282_AT 218642…

## Sheet: GSE6575_0,01
source	term_name	term_id	highlighted	adjusted_p_value	negative_log10_of_adjusted_p_value	term_size	query_size	intersection_size	effective_domain_size	intersections
KEGG	Spliceosome	KEGG:03040	false	0.000257176	3.58977	174	22	6	8484	7975521 8031536 7967028 7984257 7991598 8052861
REAC	mRNA Splicing - Major Pathway	REAC:R-HSA-72163	false	0.0141108	1.85045	202	22	5	10842	7914194 7975521 8031536 7991598 8052861
REAC	mRNA Splicing	REAC:R-HSA-72172	false	0.0166053	1.77975	209	22	5	10842	7914194 7975521 8031536 7991598 8052861
WP	mRNA processing	WP:WP411	false	0.0245804	1.60941	126	20	4	8286	7914194 8031536 7991598 8052861
HPA	seminal vesicle; glandular cells[≥Medium]	HPA:0430052	false	0.0021577	2.66601	5238	23	21	11019	7893469 7914194 7948606 7953040 7960728 7975521 7986569 8031536 8033118 8053214 8054997 8087935 8131069 8157038 7893473 7893717 7905731 7934026 7991598 8017150 8052861
HPA	cerebellum; cells in granular layer[≥Low]	HPA:0090181	false	0.0105538	1.97659	4549	23	19	11019	7893469 7914194 7948606 7960728 7975521 7986569 8031536 8053214 8054997 8087935 8131069 7893473 7893717 7905731 7934026 7991598 8017150 8052861 8113234
HPA	cerebellum; Purkinje cells[≥Medium]	HPA:0090162	false	0.0137732	1.86097	4126	23	18	11019	7893469 7914194 7948606 7960728 7975521 7986569 8031536 8033118 8053214 8054997 8087935 7893473 7893717 7905731 7934026 7991598 8017150 8052861
HPA	lung; endothelial cells[≥Low]	HPA:0300201	false	0.0236625	1.62594	798	23	8	11019	7893469 7953040 7960728 7975521 8031536 7893717 8052861 8168345
HPA	cerebral cortex; glial cells[≥Low]	HPA:0100121	false	0.0387659	1.41155	4927	23	19	11019	7893469 7948606 7960728 7975521 7986569 8031536 8033118 8053214 8087935 8131069 8157038 7893473 7893717 7905731 7934026 7991598 8017150 8052861 8113234
HPA	cerebellum; cells in molecular layer[≥Low]	HPA:0090191	false	0.0447657	1.34905	4460	23	18	11019	7893469 7914194 7948606 7960728 7975521 7986569 8031536 8033118 8053214 8087935 7893473 7893717 7905731 7934026 7991598 8017150 8052861 8113234
HPA	lung; endothelial cells[≥Medium]	HPA:0300202	false	0.0456283	1.34077	651	23	7	11019	7893469 7953040 7960728 7975521 8031536 7893717 8168345
CORUM	17S U2 snRNP	CORUM:2755	false	0.0381548	1.41845	30	12	3	3383	7914194 7991598 8052861

## Sheet: GSE18123_0.05
source	term_name	term_id	highlighted	adjusted_p_value	negative_log10_of_adjusted_p_value	term_size	query_size	intersection_size	effective_domain_size	intersections
GO:MF	protein binding	GO:0005515	true	1.3555e-12	11.8679	14838	590	511	20212	1552701_A_AT 1553678_A_AT 1553979_AT 1554021_A_AT 1554078_S_AT 1554390_S_AT 1554868_S_AT 1555756_A_AT 1559078_AT 1559946_S_AT 1567214_A_AT 1568763_S_AT 200050_AT 200679_X_AT 200942_S_AT 200970_S_AT 201039_S_AT 201091_S_AT 201138_S_AT 201175_AT 201218_AT 201223_S_AT 201266_AT 201280_S_AT 201300_S_AT 201304_AT 201327_S_AT 201363_S_AT 201369_S_AT 201376_S_AT 201384_S_AT 201408_AT 201483_S_AT 201518_…
GO:MF	small molecule binding	GO:0036094	true	1.08125e-06	5.96608	6357	590	253	20212	1553678_A_AT 1553979_AT 1554021_A_AT 1554078_S_AT 1554390_S_AT 1555756_A_AT 1559078_AT 1559946_S_AT 1568763_S_AT 200050_AT 201218_AT 201266_AT 201300_S_AT 201327_S_AT 201369_S_AT 201384_S_AT 201408_AT 201483_S_AT 201595_S_AT 201699_AT 201713_S_AT 201879_AT 201898_S_AT 201930_AT 201971_S_AT 202097_AT 202163_S_AT 202171_AT 202425_X_AT 202428_X_AT 202574_S_AT 202673_AT 202719_S_AT 202798_AT 202888_S…
GO:MF	ion binding	GO:0043167	false	1.29316e-06	5.88835	6146	590	246	20212	1553678_A_AT 1553979_AT 1554021_A_AT 1554078_S_AT 1554390_S_AT 1555756_A_AT 1559078_AT 1559946_S_AT 1568763_S_AT 200050_AT 201266_AT 201300_S_AT 201327_S_AT 201369_S_AT 201384_S_AT 201408_AT 201483_S_AT 201595_S_AT 201699_AT 201713_S_AT 201879_AT 201898_S_AT 201930_AT 201971_S_AT 202097_AT 202163_S_AT 202171_AT 202425_X_AT 202428_X_AT 202574_S_AT 202673_AT 202719_S_AT 202798_AT 202888_S_AT 202918…
GO:MF	molecular adaptor activity	GO:0060090	true	3.13674e-06	5.50352	1136	590	69	20212	1559078_AT 1559946_S_AT 1568763_S_AT 200679_X_AT 200942_S_AT 201218_AT 201280_S_AT 201300_S_AT 201518_AT 201637_S_AT 201699_AT 202097_AT 202138_X_AT 202460_S_AT 202657_S_AT 202704_AT 202824_S_AT 203497_AT 205690_S_AT 206074_S_AT 207655_S_AT 208808_S_AT 208946_S_AT 209014_AT 209049_S_AT 210962_S_AT 211989_AT 212124_AT 212209_AT 212415_AT 214512_S_AT 215012_AT 217729_S_AT 217750_S_AT 217872_AT 2179…
GO:MF	protein-macromolecule adaptor activity	GO:0030674	false	7.42997e-06	5.12901	947	590	60	20212	1559078_AT 1559946_S_AT 1568763_S_AT 200679_X_AT 200942_S_AT 201218_AT 201280_S_AT 201300_S_AT 201637_S_AT 201699_AT 202097_AT 202460_S_AT 202657_S_AT 202704_AT 202824_S_AT 203497_AT 205690_S_AT 206074_S_AT 207655_S_AT 208808_S_AT 208946_S_AT 209014_AT 209049_S_AT 211989_AT 212124_AT 212209_AT 214512_S_AT 215012_AT 217729_S_AT 217872_AT 218131_S_AT 218283_AT 218386_X_AT 218482_AT 218846_AT 221763…
GO:MF	transcription coregulator activity	GO:0003712	false	0.00272178	2.56515	524	590	35	20212	1559078_AT 1559946_S_AT 200679_X_AT 200942_S_AT 201218_AT 202460_S_AT 202657_S_AT 202704_AT 203497_AT 205690_S_AT 206074_S_AT 208808_S_AT 209014_AT 209049_S_AT 211989_AT 212124_AT 212209_AT 214512_S_AT 215012_AT 217729_S_AT 218283_AT 218386_X_AT 218482_AT 218846_AT 221763_AT 222415_AT 222737_S_AT 223132_S_AT 224570_S_AT 227277_AT 229943_AT 1556058_S_AT 209334_S_AT 231934_AT 234393_AT
GO:MF	transcription coactivator activity	GO:0003713	false	0.00803079	2.09524	290	590	23	20212	200679_X_AT 201218_AT 202460_S_AT 202657_S_AT 203497_AT 205690_S_AT 206074_S_AT 208808_S_AT 209014_AT 211989_AT 212124_AT 214512_S_AT 218283_AT 218386_X_AT 218482_AT 218846_AT 222415_AT 222737_S_AT 223132_S_AT 227277_AT 229943_AT 209334_S_AT 231934_AT
GO:MF	oxidoreduction-driven active transmembrane transporter activity	GO:0015453	true	0.0103951	1.98317	66	590	10	20212	1553575_AT 201304_AT 201757_AT 202001_S_AT 202110_AT 202233_S_AT 202298_AT 203371_S_AT 218201_AT 223281_S_AT
GO:MF	enzyme binding	GO:0019899	false	0.0150929	1.82123	2103	590	93	20212	1552701_A_AT 1553678_A_AT 1554078_S_AT 1559078_AT 1559946_S_AT 200679_X_AT 201039_S_AT 201091_S_AT 201218_AT 201300_S_AT 201384_S_AT 201408_AT 201483_S_AT 201518_AT 201713_S_AT 201879_AT 201898_S_AT 202060_AT 202425_X_AT 202704_AT 202724_S_AT 202897_AT 202918_S_AT 203076_S_AT 203250_AT 203474_AT 203497_AT 204132_S_AT 204396_S_AT 204837_AT 205178_S_AT 205484_AT 206074_S_AT 206170_AT 206445_S_AT 20…
GO:MF	ubiquitin-like protein transferase activity	GO:0019787	true	0.0208859	1.68015	484	590	31	20212	201713_S_AT 201879_AT 201898_S_AT 203497_AT 205178_S_AT 208728_S_AT 208924_AT 210538_S_AT 212124_AT 212155_AT 215012_AT 217750_S_AT 223132_S_AT 224747_AT 225813_AT 226917_S_AT 229943_AT 234950_S_AT 235199_AT 235222_X_AT 1559214_AT 1570251_AT 210867_AT 211444_AT 231934_AT 232365_AT 232792_AT 236122_AT 241140_AT 241826_X_AT 241887_AT
GO:MF	aminoacyltransferase activity	GO:0016755	false	0.0396414	1.40185	501	590	31	20212	201713_S_AT 201879_AT 201898_S_AT 203497_AT 205178_S_AT 208728_S_AT 208924_AT 210538_S_AT 212124_AT 212155_AT 215012_AT 217750_S_AT 223132_S_AT 224747_AT 225813_AT 226917_S_AT 229943_AT 234950_S_AT 235199_AT 235222_X_AT 1559214_AT 1570251_AT 210867_AT 211444_AT 231934_AT 232365_AT 232792_AT 236122_AT 241140_AT 241826_X_AT 241887_AT
GO:MF	mitogen-activated protein kinase kinase kinase binding	GO:0031435	true	0.0496598	1.30399	17	590	5	20212	208728_S_AT 210776_X_AT 223132_S_AT 1556064_AT 228942_S_AT
GO:BP	cellular nitrogen compound biosynthetic process	GO:0044271	true	4.62768e-12	11.3346	4836	574	215	21031	1552701_A_AT 1553575_AT 1553979_AT 1554021_A_AT 1554078_S_AT 1554390_S_AT 1555756_A_AT 1559078_AT 1559946_S_AT 1569594_A_AT 200050_AT 200679_X_AT 200942_S_AT 200970_S_AT 201091_S_AT 201138_S_AT 201218_AT 201280_S_AT 201300_S_AT 201304_AT 201327_S_AT 201363_S_AT 201369_S_AT 201483_S_AT 201518_AT 201595_S_AT 201637_S_AT 201699_AT 201757_AT 201971_S_AT 202001_S_AT 202060_AT 202138_X_AT 202163_S_AT 2…
GO:BP	aromatic compound biosynthetic process	GO:0019438	false	1.61343e-08	7.79225	4116	574	180	21031	1552701_A_AT 1553575_AT 1553979_AT 1554021_A_AT 1554078_S_AT 1554390_S_AT 1555756_A_AT 1559078_AT 1559946_S_AT 200050_AT 200679_X_AT 200942_S_AT 201091_S_AT 201218_AT 201280_S_AT 201300_S_AT 201304_AT 201327_S_AT 201363_S_AT 201483_S_AT 201518_AT 201699_AT 201757_AT 201971_S_AT 202001_S_AT 202060_AT 202171_AT 202279_AT 202298_AT 202325_S_AT 202425_X_AT 202460_S_AT 202657_S_AT 202704_AT 202724_S_A…
GO:BP	heterocycle biosynthetic process	GO:0018130	false	2.46427e-08	7.60831	4105	574	179	21031	1552701_A_AT 1553575_AT 1553979_AT 1554021_A_AT 1554078_S_AT 1554390_S_AT 1555756_A_AT 1559078_AT 1559946_S_AT 200050_AT 200679_X_AT 200942_S_AT 201091_S_AT 201218_AT 201280_S_AT 201300_S_AT 201304_AT 201327_S_AT 201363_S_AT 201483_S_AT 201518_AT 201699_AT 201757_AT 201971_S_AT 202001_S_AT 202060_AT 202171_AT 202279_AT 202298_AT 202325_S_AT 202425_X_AT 202460_S_AT 202657_S_AT 202704_AT 202724_S_A…
GO:BP	regulation of primary metabolic process	GO:0080090	false	7.30047e-08	7.13665	5591	574	224	21031	1552701_A_AT 1553979_AT 1554021_A_AT 1554078_S_AT 1554390_S_AT 1555756_A_AT 1559078_AT 1559946_S_AT 1568763_S_AT 200050_AT 200679_X_AT 200942_S_AT 200970_S_AT 201039_S_AT 201091_S_AT 201138_S_AT 201218_AT 201223_S_AT 201280_S_AT 201300_S_AT 201327_S_AT 201363_S_AT 201369_S_AT 201376_S_AT 201483_S_AT 201518_AT 201626_AT 201637_S_AT 201678_S_AT 201699_AT 201713_S_AT 201879_AT 201930_AT 202060_AT 20…
GO:BP	nucleobase-containing compound biosynthetic process	GO:0034654	false	1.22127e-07	6.91319	4027	574	174	21031	1552701_A_AT 1553575_AT 1553979_AT 1554021_A_AT 1554078_S_AT 1554390_S_AT 1555756_A_AT 1559078_AT 1559946_S_AT 200050_AT 200679_X_AT 200942_S_AT 201091_S_AT 201218_AT 201280_S_AT 201300_S_AT 201304_AT 201327_S_AT 201363_S_AT 201483_S_AT 201518_AT 201699_AT 201757_AT 201971_S_AT 202001_S_AT 202060_AT 202171_AT 202279_AT 202298_AT 202325_S_AT 202425_X_AT 202460_S_AT 202657_S_AT 202704_AT 202724_S_A…
GO:BP	organonitrogen compound metabolic process	GO:1901564	false	1.31017e-07	6.88267	5986	574	235	21031	1552701_A_AT 1553575_AT 1554078_S_AT 1554868_S_AT 1555756_A_AT 1559078_AT 1559946_S_AT 1568763_S_AT 1569594_A_AT 200679_X_AT 200970_S_AT 201039_S_AT 201138_S_AT 201223_S_AT 201280_S_AT 201300_S_AT 201304_AT 201327_S_AT 201363_S_AT 201369_S_AT 201408_AT 201595_S_AT 201637_S_AT 201678_S_AT 201699_AT 201713_S_AT 201757_AT 201879_AT 201898_S_AT 201971_S_AT 202001_S_AT 202138_X_AT 202163_S_AT 202279_A…
GO:BP	regulation of nitrogen compound metabolic process	GO:0051171	false	1.6524e-07	6.78189	5440	574	218	21031	1552701_A_AT 1553979_AT 1554021_A_AT 1554078_S_AT 1554390_S_AT 1555756_A_AT 1559078_AT 1559946_S_AT 1568763_S_AT 200050_AT 200679_X_AT 200942_S_AT 200970_S_AT 201039_S_AT 201091_S_AT 201138_S_AT 201218_AT 201223_S_AT 201280_S_AT 201300_S_AT 201327_S_AT 201363_S_AT 201369_S_AT 201376_S_AT 201483_S_AT 201518_AT 201637_S_AT 201678_S_AT 201699_AT 201879_AT 201930_AT 202060_AT 202138_X_AT 202163_S_AT …
GO:BP	organic cyclic compound biosynthetic process	GO:1901362	false	1.82316e-07	6.73918	4264	574	181	21031	1552701_A_AT 1553575_AT 1553979_AT 1554021_A_AT 1554078_S_AT 1554390_S_AT 1555756_A_AT 1559078_AT 1559946_S_AT 200050_AT 200679_X_AT 200942_S_AT 201091_S_AT 201218_AT 201280_S_AT 201300_S_AT 201304_AT 201327_S_AT 201363_S_AT 201483_S_AT 201518_AT 201626_AT 201699_AT 201757_AT 201971_S_AT 202001_S_AT 202060_AT 202171_AT 202279_AT 202298_AT 202325_S_AT 202425_X_AT 202460_S_AT 202657_S_AT 202704_AT …
GO:BP	regulation of nucleobase-containing compound metabolic process	GO:0019219	false	2.94259e-06	5.53127	4063	574	170	21031	1552701_A_AT 1553979_AT 1554021_A_AT 1554078_S_AT 1554390_S_AT 1555756_A_AT 1559078_AT 1559946_S_AT 200050_AT 200679_X_AT 200942_S_AT 201091_S_AT 201218_AT 201280_S_AT 201300_S_AT 201327_S_AT 201369_S_AT 201376_S_AT 201483_S_AT 201518_AT 201637_S_AT 201678_S_AT 201699_AT 201930_AT 202060_AT 202163_S_AT 202171_AT 202425_X_AT 202460_S_AT 202657_S_AT 202704_AT 202724_S_AT 202824_S_AT 203076_S_AT 203…
GO:BP	positive regulation of biological process	GO:0048518	false	6.03415e-06	5.21938	6250	574	236	21031	1552426_A_AT 1552701_A_AT 1553678_A_AT 1554078_S_AT 1554390_S_AT 1555756_A_AT 1559078_AT 1559946_S_AT 1568763_S_AT 200679_X_AT 200970_S_AT 201039_S_AT 201138_S_AT 201218_AT 201280_S_AT 201300_S_AT 201327_S_AT 201369_S_AT 201483_S_AT 201637_S_AT 201678_S_AT 201699_AT 201879_AT 202060_AT 202138_X_AT 202163_S_AT 202171_AT 202425_X_AT 202428_X_AT 202460_S_AT 202574_S_AT 202657_S_AT 202704_AT 202724_S…
GO:BP	regulation of metabolic process	GO:0019222	false	8.46062e-06	5.0726	7158	574	262	21031	1552701_A_AT 1553678_A_AT 1553979_AT 1554021_A_AT 1554078_S_AT 1554390_S_AT 1555756_A_AT 1559078_AT 1559946_S_AT 1568763_S_AT 200050_AT 200679_X_AT 200942_S_AT 200970_S_AT 201039_S_AT 201091_S_AT 201138_S_AT 201218_AT 201223_S_AT 201280_S_AT 201300_S_AT 201327_S_AT 201363_S_AT 201369_S_AT 201376_S_AT 201408_AT 201483_S_AT 201518_AT 201626_AT 201637_S_AT 201678_S_AT 201699_AT 201713_S_AT 201879_AT…
GO:BP	regulation of RNA metabolic process	GO:0051252	false	1.18959e-05	4.9246	3763	574	158	21031	1552701_A_AT 1553979_AT 1554021_A_AT 1554078_S_AT 1554390_S_AT 1555756_A_AT 1559078_AT 1559946_S_AT 200050_AT 200679_X_AT 200942_S_AT 201091_S_AT 201218_AT 201280_S_AT 201300_S_AT 201369_S_AT 201376_S_AT 201483_S_AT 201518_AT 201637_S_AT 201699_AT 202060_AT 202163_S_AT 202171_AT 202425_X_AT 202460_S_AT 202657_S_AT 202704_AT 202724_S_AT 202824_S_AT 203076_S_AT 203250_AT 203497_AT 203534_AT 203693_…
GO:BP	intracellular transport	GO:0046907	true	1.48789e-05	4.82743	1371	574	75	21031	1554390_S_AT 1568763_S_AT 1569594_A_AT 200942_S_AT 201138_S_AT 201280_S_AT 201569_S_AT 201626_AT 201713_S_AT 202097_AT 202425_X_AT 202798_AT 203310_AT 203497_AT 203519_S_AT 203693_S_AT 206095_S_AT 206170_AT 208728_S_AT 208864_S_AT 208946_S_AT 209150_S_AT 210312_S_AT 213746_S_AT 213939_S_AT 215691_X_AT 215936_S_AT 217772_S_AT 217887_S_AT 218050_AT 218178_S_AT 218357_S_AT 218482_AT 219402_S_AT 2224…
GO:BP	positive regulation of nucleobase-containing compound metabolic process	GO:0045935	false	1.51481e-05	4.81964	2052	574	100	21031	1554390_S_AT 1559078_AT 1559946_S_AT 200679_X_AT 201218_AT 201280_S_AT 201327_S_AT 201369_S_AT 201483_S_AT 201637_S_AT 201678_S_AT 201699_AT 202060_AT 202163_S_AT 202171_AT 202425_X_AT 202460_S_AT 202657_S_AT 202704_AT 202724_S_AT 203076_S_AT 203250_AT 203497_AT 203534_AT 203693_S_AT 204132_S_AT 205690_S_AT 206074_S_AT 206170_AT 208003_S_AT 208442_S_AT 208691_AT 208728_S_AT 208808_S_AT 208863_S_A…
GO:BP	protein metabolic process	GO:0019538	false	3.91882e-05	4.40685	4912	574	192	21031	1552701_A_AT 1554078_S_AT 1554868_S_AT 1555756_A_AT 1559078_AT 1559946_S_AT 1568763_S_AT 1569594_A_AT 200679_X_AT 200970_S_AT 201039_S_AT 201138_S_AT 201223_S_AT 201280_S_AT 201300_S_AT 201327_S_AT 201363_S_AT 201369_S_AT 201408_AT 201595_S_AT 201637_S_AT 201678_S_AT 201699_AT 201713_S_AT 201879_AT 201898_S_AT 202138_X_AT 202163_S_AT 202292_X_AT 202425_X_AT 202428_X_AT 202574_S_AT 202673_AT 20270…
GO:BP	positive regulation of nitrogen compound metabolic process	GO:0051173	false	4.11951e-05	4.38515	3001	574	131	21031	1554078_S_AT 1554390_S_AT 1555756_A_AT 1559078_AT 1559946_S_AT 1568763_S_AT 200679_X_AT 200970_S_AT 201039_S_AT 201138_S_AT 201218_AT 201280_S_AT 201300_S_AT 201327_S_AT 201369_S_AT 201483_S_AT 201637_S_AT 201678_S_AT 201699_AT 201879_AT 202060_AT 202138_X_AT 202163_S_AT 202171_AT 202425_X_AT 202460_S_AT 202657_S_AT 202704_AT 202724_S_AT 203076_S_AT 203250_AT 203497_AT 203534_AT 203693_S_AT 20413…
GO:BP	biological regulation	GO:0065007	false	4.38965e-05	4.35757	12680	574	409	21031	1552426_A_AT 1552701_A_AT 1553678_A_AT 1553979_AT 1554021_A_AT 1554078_S_AT 1554390_S_AT 1555756_A_AT 1559078_AT 1559946_S_AT 1568763_S_AT 200050_AT 200679_X_AT 200942_S_AT 200970_S_AT 201039_S_AT 201091_S_AT 201138_S_AT 201218_AT 201223_S_AT 201266_AT 201280_S_AT 201300_S_AT 201327_S_AT 201363_S_AT 201369_S_AT 201376_S_AT 201384_S_AT 201408_AT 201483_S_AT 201518_AT 201595_S_AT 201626_AT 201637_S…
GO:BP	positive regulation of RNA metabolic process	GO:0051254	false	5.67328e-05	4.24617	1852	574	91	21031	1554390_S_AT 1559078_AT 1559946_S_AT 200679_X_AT 201218_AT 201280_S_AT 201369_S_AT 201483_S_AT 201637_S_AT 201699_AT 202060_AT 202163_S_AT 202171_AT 202425_X_AT 202460_S_AT 202657_S_AT 202704_AT 202724_S_AT 203076_S_AT 203250_AT 203497_AT 203534_AT 203693_S_AT 204132_S_AT 205690_S_AT 206074_S_AT 206170_AT 208003_S_AT 208442_S_AT 208808_S_AT 208863_S_AT 209014_AT 209049_S_AT 209330_S_AT 209348_S_A…
GO:BP	aerobic electron transport chain	GO:0019646	true	6.50911e-05	4.18648	92	574	15	21031	1553575_AT 201304_AT 201568_AT 201754_AT 201757_AT 202001_S_AT 202110_AT 202233_S_AT 202298_AT 203371_S_AT 205849_S_AT 209095_AT 213846_AT 218201_AT 223281_S_AT
GO:BP	regulation of biological process	GO:0050789	false	6.94589e-05	4.15827	12287	574	398	21031	1552426_A_AT 1552701_A_AT 1553678_A_AT 1553979_AT 1554021_A_AT 1554078_S_AT 1554390_S_AT 1555756_A_AT 1559078_AT 1559946_S_AT 1568763_S_AT 200050_AT 200679_X_AT 200942_S_AT 200970_S_AT 201039_S_AT 201091_S_AT 201138_S_AT 201218_AT 201223_S_AT 201266_AT 201280_S_AT 201300_S_AT 201327_S_AT 201363_S_AT 201369_S_AT 201376_S_AT 201384_S_AT 201408_AT 201483_S_AT 201518_AT 201595_S_AT 201626_AT 201637_S…
GO:BP	protein transport	GO:0015031	false	7.31453e-05	4.13581	1424	574	75	21031	1568763_S_AT 200970_S_AT 201280_S_AT 201569_S_AT 201626_AT 201713_S_AT 202097_AT 202425_X_AT 202724_S_AT 202798_AT 203076_S_AT 203310_AT 203497_AT 203693_S_AT 208691_AT 208728_S_AT 208864_S_AT 208946_S_AT 210312_S_AT 213746_S_AT 213939_S_AT 214433_S_AT 214709_S_AT 215691_X_AT 215936_S_AT 217772_S_AT 217887_S_AT 218050_AT 218178_S_AT 218357_S_AT 218482_AT 219402_S_AT 222436_S_AT 222708_S_AT 222826…
GO:BP	regulation of cellular process	GO:0050794	false	9.94268e-05	4.0025	11738	574	383	21031	1552426_A_AT 1552701_A_AT 1553678_A_AT 1553979_AT 1554021_A_AT 1554078_S_AT 1554390_S_AT 1555756_A_AT 1559078_AT 1559946_S_AT 1568763_S_AT 200050_AT 200679_X_AT 200942_S_AT 200970_S_AT 201039_S_AT 201091_S_AT 201138_S_AT 201218_AT 201266_AT 201280_S_AT 201300_S_AT 201327_S_AT 201363_S_AT 201369_S_AT 201376_S_AT 201384_S_AT 201408_AT 201483_S_AT 201518_AT 201595_S_AT 201626_AT 201637_S_AT 201678_S…
GO:BP	nitrogen compound transport	GO:0071705	false	0.000122616	3.91145	1911	574	92	21031	1553678_A_AT 1568763_S_AT 200970_S_AT 201138_S_AT 201280_S_AT 201569_S_AT 201626_AT 201713_S_AT 201917_S_AT 202097_AT 202425_X_AT 202724_S_AT 202798_AT 203076_S_AT 203310_AT 203497_AT 203519_S_AT 203693_S_AT 208691_AT 208728_S_AT 208863_S_AT 208864_S_AT 208946_S_AT 209301_AT 210312_S_AT 213746_S_AT 213939_S_AT 214433_S_AT 214709_S_AT 215691_X_AT 215936_S_AT 217772_S_AT 217887_S_AT 218050_AT 21817…
GO:BP	positive regulation of metabolic process	GO:0009893	false	0.000139733	3.8547	3711	574	152	21031	1554078_S_AT 1554390_S_AT 1555756_A_AT 1559078_AT 1559946_S_AT 1568763_S_AT 200679_X_AT 200970_S_AT 201039_S_AT 201138_S_AT 201218_AT 201280_S_AT 201300_S_AT 201327_S_AT 201369_S_AT 201483_S_AT 201637_S_AT 201678_S_AT 201699_AT 201879_AT 202060_AT 202138_X_AT 202163_S_AT 202171_AT 202425_X_AT 202460_S_AT 202657_S_AT 202704_AT 202724_S_AT 203076_S_AT 203250_AT 203497_AT 203534_AT 203693_S_AT 20413…
GO:BP	DNA-templated transcription	GO:0006351	false	0.000179298	3.74642	3569	574	147	21031	1552701_A_AT 1553979_AT 1554021_A_AT 1554078_S_AT 1554390_S_AT 1555756_A_AT 1559078_AT 1559946_S_AT 200050_AT 200679_X_AT 200942_S_AT 201091_S_AT 201218_AT 201280_S_AT 201300_S_AT 201363_S_AT 201483_S_AT 201518_AT 201699_AT 202060_AT 202171_AT 202425_X_AT 202460_S_AT 202657_S_AT 202704_AT 202724_S_AT 202824_S_AT 203076_S_AT 203250_AT 203497_AT 203693_S_AT 204132_S_AT 205594_AT 205690_S_AT 206074_…
GO:BP	RNA biosynthetic process	GO:0032774	false	0.000181953	3.74004	3601	574	148	21031	1552701_A_AT 1553979_AT 1554021_A_AT 1554078_S_AT 1554390_S_AT 1555756_A_AT 1559078_AT 1559946_S_AT 200050_AT 200679_X_AT 200942_S_AT 201091_S_AT 201218_AT 201280_S_AT 201300_S_AT 201363_S_AT 201483_S_AT 201518_AT 201699_AT 202060_AT 202171_AT 202425_X_AT 202460_S_AT 202657_S_AT 202704_AT 202724_S_AT 202824_S_AT 203076_S_AT 203250_AT 203497_AT 203693_S_AT 204132_S_AT 205594_AT 205690_S_AT 206074_…
GO:BP	positive regulation of macromolecule metabolic process	GO:0010604	false	0.000200679	3.6975	3420	574	142	21031	1554078_S_AT 1554390_S_AT 1555756_A_AT 1559078_AT 1559946_S_AT 1568763_S_AT 200679_X_AT 200970_S_AT 201039_S_AT 201138_S_AT 201218_AT 201280_S_AT 201300_S_AT 201327_S_AT 201369_S_AT 201483_S_AT 201637_S_AT 201678_S_AT 201699_AT 201879_AT 202060_AT 202138_X_AT 202163_S_AT 202171_AT 202425_X_AT 202460_S_AT 202657_S_AT 202704_AT 202724_S_AT 203076_S_AT 203250_AT 203497_AT 203534_AT 203693_S_AT 20413…
GO:BP	ATP synthesis coupled electron transport	GO:0042773	false	0.000205885	3.68638	100	574	15	21031	1553575_AT 201304_AT 201568_AT 201754_AT 201757_AT 202001_S_AT 202110_AT 202233_S_AT 202298_AT 203371_S_AT 205849_S_AT 209095_AT 213846_AT 218201_AT 223281_S_AT
GO:BP	mitochondrial ATP synthesis coupled electron transport	GO:0042775	false	0.000205885	3.68638	100	574	15	21031	1553575_AT 201304_AT 201568_AT 201754_AT 201757_AT 202001_S_AT 202110_AT 202233_S_AT 202298_AT 203371_S_AT 205849_S_AT 209095_AT 213846_AT 218201_AT 223281_S_AT
GO:BP	oxidative phosphorylation	GO:0006119	false	0.000216351	3.66484	145	574	18	21031	1553575_AT 201304_AT 201568_AT 201754_AT 201757_AT 202001_S_AT 202110_AT 202233_S_AT 202298_AT 202325_S_AT 203371_S_AT 205849_S_AT 207335_X_AT 209095_AT 213846_AT 218201_AT 223281_S_AT 204348_S_AT
GO:BP	positive regulation of cellular process	GO:0048522	false	0.000220145	3.65729	5717	574	213	21031	1552426_A_AT 1552701_A_AT 1553678_A_AT 1554078_S_AT 1554390_S_AT 1555756_A_AT 1559078_AT 1559946_S_AT 1568763_S_AT 200679_X_AT 200970_S_AT 201039_S_AT 201138_S_AT 201218_AT 201280_S_AT 201300_S_AT 201327_S_AT 201369_S_AT 201483_S_AT 201637_S_AT 201678_S_AT 201699_AT 202060_AT 202163_S_AT 202171_AT 202425_X_AT 202460_S_AT 202574_S_AT 202657_S_AT 202704_AT 202724_S_AT 202897_AT 203076_S_AT 203250_A…
GO:BP	cellular localization	GO:0051641	false	0.000258434	3.58765	3621	574	148	21031	1553678_A_AT 1554078_S_AT 1554390_S_AT 1559946_S_AT 1568763_S_AT 1569594_A_AT 200942_S_AT 200970_S_AT 201138_S_AT 201218_AT 201280_S_AT 201300_S_AT 201327_S_AT 201569_S_AT 201626_AT 201637_S_AT 201713_S_AT 201971_S_AT 202097_AT 202425_X_AT 202724_S_AT 202798_AT 203076_S_AT 203310_AT 203497_AT 203519_S_AT 203693_S_AT 204838_S_AT 206095_S_AT 206170_AT 207812_S_AT 208442_S_AT 208691_AT 208728_S_AT 2…
GO:BP	chromosome organization	GO:0051276	true	0.000313409	3.50389	635	574	42	21031	1559946_S_AT 200679_X_AT 201327_S_AT 201930_AT 203087_S_AT 204838_S_AT 206074_S_AT 208066_S_AT 208442_S_AT 208808_S_AT 208946_S_AT 209150_S_AT 209285_S_AT 209330_S_AT 211989_AT 212132_AT 212264_S_AT 212918_AT 213251_AT 213746_S_AT 214512_S_AT 216199_S_AT 218178_S_AT 221771_S_AT 222436_S_AT 222479_S_AT 222737_S_AT 225107_AT 226843_S_AT 226917_S_AT 231848_X_AT 1557502_AT 1559006_AT 228323_AT 228559…
GO:BP	establishment of localization in cell	GO:0051649	false	0.000516168	3.28721	1972	574	92	21031	1553678_A_AT 1554390_S_AT 1568763_S_AT 1569594_A_AT 200942_S_AT 201138_S_AT 201218_AT 201280_S_AT 201569_S_AT 201626_AT 201713_S_AT 201971_S_AT 202097_AT 202425_X_AT 202798_AT 203310_AT 203497_AT 203519_S_AT 203693_S_AT 206095_S_AT 206170_AT 208442_S_AT 208728_S_AT 208864_S_AT 208946_S_AT 209150_S_AT 210312_S_AT 211734_S_AT 213746_S_AT 213939_S_AT 215691_X_AT 215936_S_AT 217772_S_AT 217887_S_AT 2…
GO:BP	positive regulation of catabolic process	GO:0009896	false	0.0005485	3.26082	533	574	37	21031	200679_X_AT 201039_S_AT 201280_S_AT 201369_S_AT 201637_S_AT 201699_AT 201879_AT 202163_S_AT 202704_AT 202724_S_AT 203534_AT 204132_S_AT 206170_AT 208442_S_AT 208946_S_AT 209217_S_AT 209330_S_AT 214273_X_AT 223132_S_AT 224652_AT 225123_AT 225813_AT 226843_S_AT 227277_AT 227366_AT 229943_AT 234950_S_AT 1555330_AT 1556064_AT 1559214_AT 1570251_AT 207851_S_AT 210739_X_AT 210867_AT 211444_AT 228942_S_…
GO:BP	regulation of macromolecule metabolic process	GO:0060255	false	0.000562156	3.25014	6631	574	238	21031	1552701_A_AT 1553979_AT 1554021_A_AT 1554078_S_AT 1554390_S_AT 1555756_A_AT 1559078_AT 1559946_S_AT 1568763_S_AT 200050_AT 200679_X_AT 200942_S_AT 200970_S_AT 201039_S_AT 201091_S_AT 201138_S_AT 201218_AT 201223_S_AT 201280_S_AT 201300_S_AT 201327_S_AT 201363_S_AT 201369_S_AT 201376_S_AT 201408_AT 201483_S_AT 201518_AT 201637_S_AT 201678_S_AT 201699_AT 201879_AT 201930_AT 202060_AT 202138_X_AT 20…
GO:BP	macromolecule modification	GO:0043412	false	0.000572745	3.24204	3262	574	135	21031	1554078_S_AT 1554868_S_AT 1559078_AT 1568763_S_AT 200970_S_AT 201138_S_AT 201280_S_AT 201300_S_AT 201363_S_AT 201408_AT 201637_S_AT 201713_S_AT 201879_AT 201898_S_AT 202138_X_AT 202292_X_AT 202425_X_AT 202428_X_AT 202574_S_AT 202673_AT 202724_S_AT 202824_S_AT 202897_AT 203316_S_AT 203497_AT 204396_S_AT 205178_S_AT 205644_S_AT 206170_AT 206445_S_AT 206875_S_AT 208066_S_AT 208442_S_AT 208691_AT 208…
GO:BP	establishment of protein localization	GO:0045184	false	0.000637794	3.19532	1924	574	90	21031	1559946_S_AT 1568763_S_AT 200970_S_AT 201280_S_AT 201300_S_AT 201327_S_AT 201569_S_AT 201626_AT 201713_S_AT 202097_AT 202425_X_AT 202724_S_AT 202798_AT 203076_S_AT 203310_AT 203497_AT 203693_S_AT 207812_S_AT 208691_AT 208728_S_AT 208864_S_AT 208946_S_AT 210312_S_AT 213746_S_AT 213939_S_AT 214433_S_AT 214709_S_AT 215691_X_AT 215936_S_AT 217772_S_AT 217887_S_AT 218050_AT 218057_X_AT 218178_S_AT 218…
GO:BP	ribonucleotide biosynthetic process	GO:0009260	false	0.000978279	3.00954	231	574	22	21031	1553575_AT 201304_AT 201757_AT 201971_S_AT 202001_S_AT 202279_AT 202298_AT 202325_S_AT 203302_AT 203371_S_AT 203741_S_AT 204639_AT 207335_X_AT 208972_S_AT 209095_AT 218201_AT 221751_AT 222448_S_AT 239798_AT 1556064_AT 204348_S_AT 238856_S_AT
GO:BP	aerobic respiration	GO:0009060	false	0.00109521	2.9605	196	574	20	21031	1553575_AT 201304_AT 201568_AT 201754_AT 201757_AT 202001_S_AT 202110_AT 202233_S_AT 202298_AT 202325_S_AT 203371_S_AT 205849_S_AT 207335_X_AT 209095_AT 213846_AT 218201_AT 223281_S_AT 225892_AT 204348_S_AT 238856_S_AT
GO:BP	modification-dependent macromolecule catabolic process	GO:0043632	true	0.00119298	2.92337	620	574	40	21031	1554868_S_AT 1569594_A_AT 201039_S_AT 201223_S_AT 201280_S_AT 201699_AT 201879_AT 201898_S_AT 202824_S_AT 205178_S_AT 208924_AT 209150_S_AT 212155_AT 217750_S_AT 218178_S_AT 219402_S_AT 222436_S_AT 225422_AT 225813_AT 226843_S_AT 226917_S_AT 229467_AT 229943_AT 234950_S_AT 235199_AT 45828_AT 1555330_AT 1559214_AT 1570251_AT 209334_S_AT 210867_AT 211444_AT 215384_S_AT 215402_AT 231269_AT 232365_AT…
GO:BP	regulation of RNA biosynthetic process	GO:2001141	false	0.00127302	2.89516	3464	574	140	21031	1552701_A_AT 1553979_AT 1554021_A_AT 1554078_S_AT 1554390_S_AT 1555756_A_AT 1559078_AT 1559946_S_AT 200050_AT 200679_X_AT 200942_S_AT 201091_S_AT 201218_AT 201280_S_AT 201300_S_AT 201483_S_AT 201518_AT 201699_AT 202060_AT 202171_AT 202425_X_AT 202460_S_AT 202657_S_AT 202704_AT 202724_S_AT 202824_S_AT 203076_S_AT 203250_AT 203497_AT 203693_S_AT 204132_S_AT 205594_AT 205690_S_AT 206074_S_AT 206095_…
GO:BP	ubiquitin-dependent protein catabolic process	GO:0006511	false	0.00132284	2.87849	599	574	39	21031	1554868_S_AT 1569594_A_AT 201039_S_AT 201223_S_AT 201280_S_AT 201699_AT 201879_AT 201898_S_AT 202824_S_AT 205178_S_AT 208924_AT 209150_S_AT 212155_AT 217750_S_AT 218178_S_AT 219402_S_AT 222436_S_AT 225422_AT 225813_AT 226917_S_AT 229467_AT 229943_AT 234950_S_AT 235199_AT 45828_AT 1555330_AT 1559214_AT 1570251_AT 209334_S_AT 210867_AT 211444_AT 215384_S_AT 215402_AT 231269_AT 232365_AT 236122_AT 2…
GO:BP	organonitrogen compound biosynthetic process	GO:1901566	false	0.00147911	2.83	1761	574	83	21031	1553575_AT 1569594_A_AT 200970_S_AT 201138_S_AT 201304_AT 201369_S_AT 201595_S_AT 201637_S_AT 201757_AT 201971_S_AT 202001_S_AT 202138_X_AT 202163_S_AT 202279_AT 202298_AT 202325_S_AT 202428_X_AT 202574_S_AT 202673_AT 202704_AT 203302_AT 203371_S_AT 203741_S_AT 203781_AT 204132_S_AT 204639_AT 206445_S_AT 207335_X_AT 208972_S_AT 209095_AT 209330_S_AT 210243_S_AT 212132_AT 212442_S_AT 212603_AT 217…
GO:BP	localization	GO:0051179	false	0.0015245	2.81687	5520	574	203	21031	1553678_A_AT 1554078_S_AT 1554390_S_AT 1555756_A_AT 1559946_S_AT 1568763_S_AT 1569594_A_AT 200679_X_AT 200942_S_AT 200970_S_AT 201138_S_AT 201218_AT 201280_S_AT 201300_S_AT 201327_S_AT 201569_S_AT 201626_AT 201637_S_AT 201687_S_AT 201713_S_AT 201917_S_AT 201971_S_AT 202097_AT 202110_AT 202233_S_AT 202325_S_AT 202425_X_AT 202428_X_AT 202574_S_AT 202724_S_AT 202798_AT 202897_AT 203076_S_AT 203310_A…
GO:BP	response to stress	GO:0006950	true	0.00154834	2.81013	3855	574	152	21031	1552701_A_AT 1553678_A_AT 1554078_S_AT 1554390_S_AT 1555756_A_AT 1559946_S_AT 1568763_S_AT 200679_X_AT 200942_S_AT 200970_S_AT 201039_S_AT 201091_S_AT 201223_S_AT 201266_AT 201300_S_AT 201369_S_AT 201384_S_AT 201518_AT 201626_AT 201637_S_AT 201678_S_AT 201898_S_AT 201930_AT 202001_S_AT 202041_S_AT 202171_AT 202425_X_AT 202724_S_AT 202897_AT 203310_AT 203497_AT 203741_S_AT 204132_S_AT 204484_AT 20…
GO:BP	regulation of DNA-templated transcription	GO:0006355	false	0.00159011	2.79857	3446	574	139	21031	1552701_A_AT 1553979_AT 1554021_A_AT 1554078_S_AT 1554390_S_AT 1555756_A_AT 1559078_AT 1559946_S_AT 200050_AT 200679_X_AT 200942_S_AT 201091_S_AT 201218_AT 201280_S_AT 201300_S_AT 201483_S_AT 201518_AT 201699_AT 202060_AT 202171_AT 202425_X_AT 202460_S_AT 202657_S_AT 202704_AT 202724_S_AT 202824_S_AT 203076_S_AT 203250_AT 203497_AT 203693_S_AT 204132_S_AT 205594_AT 205690_S_AT 206074_S_AT 206095_…
GO:BP	ribose phosphate biosynthetic process	GO:0046390	false	0.00163008	2.78779	238	574	22	21031	1553575_AT 201304_AT 201757_AT 201971_S_AT 202001_S_AT 202279_AT 202298_AT 202325_S_AT 203302_AT 203371_S_AT 203741_S_AT 204639_AT 207335_X_AT 208972_S_AT 209095_AT 218201_AT 221751_AT 222448_S_AT 239798_AT 1556064_AT 204348_S_AT 238856_S_AT
GO:BP	organelle organization	GO:0006996	false	0.00186434	2.72948	3613	574	144	21031	1553575_AT 1553678_A_AT 1554078_S_AT 1554390_S_AT 1559946_S_AT 1568763_S_AT 1569594_A_AT 200679_X_AT 201304_AT 201327_S_AT 201569_S_AT 201626_AT 201637_S_AT 201757_AT 201917_S_AT 201930_AT 201971_S_AT 202001_S_AT 202097_AT 202209_AT 202298_AT 202798_AT 203087_S_AT 203371_S_AT 203474_AT 204484_AT 204838_S_AT 205681_AT 206074_S_AT 206170_AT 206875_S_AT 207812_S_AT 208066_S_AT 208442_S_AT 208691_AT …
GO:BP	transport	GO:0006810	false	0.0018996	2.72134	4350	574	167	21031	1553678_A_AT 1554390_S_AT 1555756_A_AT 1568763_S_AT 1569594_A_AT 200679_X_AT 200942_S_AT 200970_S_AT 201138_S_AT 201218_AT 201280_S_AT 201300_S_AT 201569_S_AT 201626_AT 201713_S_AT 201917_S_AT 201971_S_AT 202097_AT 202110_AT 202233_S_AT 202325_S_AT 202425_X_AT 202428_X_AT 202574_S_AT 202724_S_AT 202798_AT 202897_AT 203076_S_AT 203310_AT 203497_AT 203519_S_AT 203693_S_AT 204639_AT 204837_AT 205668…
GO:BP	modification-dependent protein catabolic process	GO:0019941	false	0.00199757	2.6995	609	574	39	21031	1554868_S_AT 1569594_A_AT 201039_S_AT 201223_S_AT 201280_S_AT 201699_AT 201879_AT 201898_S_AT 202824_S_AT 205178_S_AT 208924_AT 209150_S_AT 212155_AT 217750_S_AT 218178_S_AT 219402_S_AT 222436_S_AT 225422_AT 225813_AT 226917_S_AT 229467_AT 229943_AT 234950_S_AT 235199_AT 45828_AT 1555330_AT 1559214_AT 1570251_AT 209334_S_AT 210867_AT 211444_AT 215384_S_AT 215402_AT 231269_AT 232365_AT 236122_AT 2…
GO:BP	organic substance transport	GO:0071702	false	0.00202013	2.69462	2358	574	103	21031	1553678_A_AT 1568763_S_AT 200970_S_AT 201138_S_AT 201280_S_AT 201569_S_AT 201626_AT 201713_S_AT 201917_S_AT 202097_AT 202425_X_AT 202428_X_AT 202724_S_AT 202798_AT 203076_S_AT 203310_AT 203497_AT 203519_S_AT 203693_S_AT 208691_AT 208728_S_AT 208863_S_AT 208864_S_AT 208946_S_AT 209301_AT 210312_S_AT 213746_S_AT 213939_S_AT 214433_S_AT 214709_S_AT 215691_X_AT 215936_S_AT 217772_S_AT 217887_S_AT 218…
GO:BP	nuclear export	GO:0051168	false	0.00218673	2.6602	169	574	18	21031	1569594_A_AT 201138_S_AT 201713_S_AT 202097_AT 203519_S_AT 208864_S_AT 215936_S_AT 218482_AT 224068_X_AT 225107_AT 227728_AT 52169_AT 1555068_AT 1559006_AT 1562110_AT 206921_AT 236505_AT 244030_AT
GO:BP	protein modification process	GO:0036211	false	0.00224979	2.64786	3031	574	125	21031	1554078_S_AT 1554868_S_AT 1559078_AT 1568763_S_AT 200970_S_AT 201280_S_AT 201300_S_AT 201363_S_AT 201408_AT 201637_S_AT 201713_S_AT 201879_AT 201898_S_AT 202138_X_AT 202292_X_AT 202425_X_AT 202428_X_AT 202574_S_AT 202673_AT 202724_S_AT 202824_S_AT 202897_AT 203497_AT 204396_S_AT 205178_S_AT 206170_AT 206445_S_AT 206875_S_AT 208066_S_AT 208442_S_AT 208691_AT 208857_S_AT 208864_S_AT 208924_AT 20899…
GO:BP	protein modification by small protein conjugation	GO:0032446	false	0.00229613	2.639	858	574	49	21031	1554078_S_AT 1554868_S_AT 1559078_AT 1568763_S_AT 201363_S_AT 201713_S_AT 201879_AT 201898_S_AT 202138_X_AT 202824_S_AT 203497_AT 205178_S_AT 208924_AT 210538_S_AT 212124_AT 212155_AT 215012_AT 217750_S_AT 218050_AT 219242_AT 219402_S_AT 223132_S_AT 224747_AT 224793_S_AT 225422_AT 225813_AT 226119_AT 226845_S_AT 226917_S_AT 229943_AT 234950_S_AT 235199_AT 235222_X_AT 1555068_AT 1555330_AT 1556318…
GO:BP	proton motive force-driven ATP synthesis	GO:0015986	false	0.00264813	2.57706	77	574	12	21031	1553575_AT 201304_AT 201757_AT 201971_S_AT 202001_S_AT 202279_AT 202298_AT 202325_S_AT 203371_S_AT 207335_X_AT 208972_S_AT 218201_AT
GO:BP	positive regulation of DNA-templated transcription	GO:0045893	false	0.00277109	2.55735	1703	574	80	21031	1554390_S_AT 1559078_AT 1559946_S_AT 200679_X_AT 201218_AT 201280_S_AT 201483_S_AT 201699_AT 202060_AT 202171_AT 202425_X_AT 202460_S_AT 202657_S_AT 202724_S_AT 203076_S_AT 203250_AT 203497_AT 203693_S_AT 204132_S_AT 205690_S_AT 206074_S_AT 206170_AT 208003_S_AT 208442_S_AT 208808_S_AT 209014_AT 209049_S_AT 209330_S_AT 209348_S_AT 210776_X_AT 211989_AT 212124_AT 212155_AT 212382_AT 212591_AT 2132…
GO:BP	respiratory electron transport chain	GO:0022904	false	0.00288183	2.54033	122	574	15	21031	1553575_AT 201304_AT 201568_AT 201754_AT 201757_AT 202001_S_AT 202110_AT 202233_S_AT 202298_AT 203371_S_AT 205849_S_AT 209095_AT 213846_AT 218201_AT 223281_S_AT
GO:BP	positive regulation of RNA biosynthetic process	GO:1902680	false	0.00296782	2.52756	1706	574	80	21031	1554390_S_AT 1559078_AT 1559946_S_AT 200679_X_AT 201218_AT 201280_S_AT 201483_S_AT 201699_AT 202060_AT 202171_AT 202425_X_AT 202460_S_AT 202657_S_AT 202724_S_AT 203076_S_AT 203250_AT 203497_AT 203693_S_AT 204132_S_AT 205690_S_AT 206074_S_AT 206170_AT 208003_S_AT 208442_S_AT 208808_S_AT 209014_AT 209049_S_AT 209330_S_AT 209348_S_AT 210776_X_AT 211989_AT 212124_AT 212155_AT 212382_AT 212591_AT 2132…
GO:BP	cellular macromolecule localization	GO:0070727	false	0.0030791	2.51158	2742	574	115	21031	1553678_A_AT 1554078_S_AT 1559946_S_AT 1568763_S_AT 200970_S_AT 201138_S_AT 201280_S_AT 201300_S_AT 201327_S_AT 201569_S_AT 201626_AT 201713_S_AT 202097_AT 202425_X_AT 202724_S_AT 202798_AT 203076_S_AT 203310_AT 203497_AT 203693_S_AT 204838_S_AT 207812_S_AT 208442_S_AT 208691_AT 208728_S_AT 208864_S_AT 208946_S_AT 209014_AT 209049_S_AT 209217_S_AT 209285_S_AT 210312_S_AT 212264_S_AT 213396_S_AT 2…
GO:BP	protein modification by small protein conjugation or removal	GO:0070647	false	0.00310376	2.50811	970	574	53	21031	1554078_S_AT 1554868_S_AT 1559078_AT 1568763_S_AT 201363_S_AT 201713_S_AT 201879_AT 201898_S_AT 202138_X_AT 202824_S_AT 203497_AT 205178_S_AT 208924_AT 210538_S_AT 212124_AT 212155_AT 215012_AT 217750_S_AT 218050_AT 218386_X_AT 219242_AT 219402_S_AT 223132_S_AT 224747_AT 224793_S_AT 225422_AT 225813_AT 225925_S_AT 226119_AT 226505_X_AT 226845_S_AT 226917_S_AT 229943_AT 234950_S_AT 235199_AT 23522…
GO:BP	regulation of chromosome organization	GO:0033044	false	0.00326153	2.48658	248	574	22	21031	1559946_S_AT 201327_S_AT 208442_S_AT 208946_S_AT 209285_S_AT 209330_S_AT 211989_AT 212264_S_AT 213251_AT 214512_S_AT 216199_S_AT 221771_S_AT 222479_S_AT 222737_S_AT 225107_AT 226843_S_AT 226917_S_AT 231848_X_AT 228323_AT 234459_AT 235572_AT 236442_AT
GO:BP	macromolecule localization	GO:0033036	false	0.00337951	2.47115	3210	574	130	21031	1553678_A_AT 1554078_S_AT 1559946_S_AT 1568763_S_AT 200970_S_AT 201138_S_AT 201280_S_AT 201300_S_AT 201327_S_AT 201569_S_AT 201626_AT 201713_S_AT 202097_AT 202425_X_AT 202428_X_AT 202724_S_AT 202798_AT 203076_S_AT 203310_AT 203497_AT 203519_S_AT 203693_S_AT 204838_S_AT 207812_S_AT 208442_S_AT 208691_AT 208728_S_AT 208863_S_AT 208864_S_AT 208946_S_AT 209014_AT 209049_S_AT 209217_S_AT 209285_S_AT 2…
GO:BP	establishment of localization	GO:0051234	false	0.00340929	2.46734	4881	574	182	21031	1553678_A_AT 1554390_S_AT 1555756_A_AT 1559946_S_AT 1568763_S_AT 1569594_A_AT 200679_X_AT 200942_S_AT 200970_S_AT 201138_S_AT 201218_AT 201280_S_AT 201300_S_AT 201327_S_AT 201569_S_AT 201626_AT 201713_S_AT 201917_S_AT 201971_S_AT 202097_AT 202110_AT 202233_S_AT 202325_S_AT 202425_X_AT 202428_X_AT 202574_S_AT 202724_S_AT 202798_AT 202897_AT 203076_S_AT 203310_AT 203497_AT 203519_S_AT 203693_S_AT 2…
GO:BP	positive regulation of macromolecule biosynthetic process	GO:0010557	false	0.00389982	2.40896	2603	574	110	21031	1554390_S_AT 1555756_A_AT 1559078_AT 1559946_S_AT 200679_X_AT 200970_S_AT 201138_S_AT 201218_AT 201280_S_AT 201327_S_AT 201483_S_AT 201637_S_AT 201678_S_AT 201699_AT 202060_AT 202171_AT 202425_X_AT 202460_S_AT 202657_S_AT 202704_AT 202724_S_AT 203076_S_AT 203250_AT 203497_AT 203693_S_AT 204132_S_AT 205690_S_AT 206074_S_AT 206170_AT 206445_S_AT 207655_S_AT 208003_S_AT 208442_S_AT 208691_AT 208808_…
GO:BP	positive regulation of cellular catabolic process	GO:0031331	false	0.00394699	2.40373	332	574	26	21031	200679_X_AT 201369_S_AT 201637_S_AT 202163_S_AT 202704_AT 202724_S_AT 203534_AT 204132_S_AT 206170_AT 208442_S_AT 208946_S_AT 209217_S_AT 209330_S_AT 214273_X_AT 223132_S_AT 224652_AT 225123_AT 225813_AT 226843_S_AT 227277_AT 229943_AT 1556064_AT 207851_S_AT 210739_X_AT 210867_AT 234757_AT
GO:BP	positive regulation of cellular metabolic process	GO:0031325	false	0.00404061	2.39355	3346	574	134	21031	1554390_S_AT 1555756_A_AT 1559078_AT 1559946_S_AT 200679_X_AT 200970_S_AT 201138_S_AT 201218_AT 201280_S_AT 201300_S_AT 201327_S_AT 201369_S_AT 201483_S_AT 201637_S_AT 201678_S_AT 201699_AT 202060_AT 202163_S_AT 202171_AT 202425_X_AT 202460_S_AT 202657_S_AT 202704_AT 202724_S_AT 203076_S_AT 203250_AT 203497_AT 203534_AT 203693_S_AT 204132_S_AT 204837_AT 205690_S_AT 206074_S_AT 206170_AT 206445_S_…
GO:BP	protein localization	GO:0008104	false	0.00436464	2.36005	2731	574	114	21031	1553678_A_AT 1554078_S_AT 1559946_S_AT 1568763_S_AT 200970_S_AT 201138_S_AT 201280_S_AT 201300_S_AT 201327_S_AT 201569_S_AT 201626_AT 201713_S_AT 202097_AT 202425_X_AT 202724_S_AT 202798_AT 203076_S_AT 203310_AT 203497_AT 203693_S_AT 204838_S_AT 207812_S_AT 208691_AT 208728_S_AT 208864_S_AT 208946_S_AT 209014_AT 209049_S_AT 209217_S_AT 209285_S_AT 210312_S_AT 212264_S_AT 213396_S_AT 213475_S_AT 2…
GO:BP	purine ribonucleotide biosynthetic process	GO:0009152	false	0.00507427	2.29463	216	574	20	21031	1553575_AT 201304_AT 201757_AT 201971_S_AT 202001_S_AT 202279_AT 202298_AT 202325_S_AT 203371_S_AT 203741_S_AT 204639_AT 207335_X_AT 208972_S_AT 209095_AT 218201_AT 221751_AT 239798_AT 1556064_AT 204348_S_AT 238856_S_AT
GO:BP	regulation of cellular metabolic process	GO:0031323	false	0.00552116	2.25797	6673	574	234	21031	1552701_A_AT 1553979_AT 1554021_A_AT 1554078_S_AT 1554390_S_AT 1555756_A_AT 1559078_AT 1559946_S_AT 200050_AT 200679_X_AT 200942_S_AT 200970_S_AT 201091_S_AT 201138_S_AT 201218_AT 201280_S_AT 201300_S_AT 201327_S_AT 201369_S_AT 201376_S_AT 201408_AT 201483_S_AT 201518_AT 201626_AT 201637_S_AT 201678_S_AT 201699_AT 201930_AT 201971_S_AT 202060_AT 202163_S_AT 202171_AT 202425_X_AT 202428_X_AT 20246…
GO:BP	intracellular protein transport	GO:0006886	false	0.00600332	2.22161	686	574	41	21031	1568763_S_AT 201569_S_AT 201626_AT 201713_S_AT 202097_AT 202425_X_AT 202798_AT 203310_AT 203497_AT 203693_S_AT 208728_S_AT 208864_S_AT 208946_S_AT 213746_S_AT 213939_S_AT 217772_S_AT 218050_AT 218357_S_AT 219402_S_AT 222708_S_AT 224068_X_AT 224377_S_AT 224662_AT 227116_AT 227728_AT 231718_AT 49878_AT 52169_AT 1557562_AT 1559006_AT 1570441_AT 207092_AT 207495_AT 215384_S_AT 215402_AT 232049_AT 234…
GO:BP	cellular response to stress	GO:0033554	false	0.00650815	2.18654	1770	574	81	21031	1554078_S_AT 1554390_S_AT 1559946_S_AT 1568763_S_AT 200679_X_AT 200942_S_AT 200970_S_AT 201039_S_AT 201091_S_AT 201223_S_AT 201384_S_AT 201518_AT 201626_AT 201678_S_AT 201898_S_AT 201930_AT 202724_S_AT 202897_AT 204132_S_AT 204484_AT 204838_S_AT 205178_S_AT 205681_AT 206074_S_AT 207812_S_AT 208003_S_AT 208442_S_AT 208808_S_AT 208864_S_AT 208946_S_AT 209049_S_AT 209217_S_AT 209348_S_AT 211989_AT 2…
GO:BP	regulation of catabolic process	GO:0009894	false	0.0075015	2.12485	1026	574	54	21031	1553678_A_AT 200679_X_AT 201039_S_AT 201223_S_AT 201280_S_AT 201369_S_AT 201637_S_AT 201699_AT 201879_AT 201971_S_AT 202163_S_AT 202704_AT 202724_S_AT 203534_AT 204132_S_AT 204837_AT 206170_AT 208442_S_AT 208946_S_AT 209217_S_AT 209330_S_AT 213746_S_AT 214273_X_AT 218030_AT 223132_S_AT 224652_AT 225123_AT 225387_AT 225813_AT 225892_AT 226843_S_AT 227277_AT 227366_AT 229943_AT 234950_S_AT 1553989_…
GO:BP	positive regulation of cellular biosynthetic process	GO:0031328	false	0.00973251	2.01178	2685	574	111	21031	1554390_S_AT 1555756_A_AT 1559078_AT 1559946_S_AT 200679_X_AT 200970_S_AT 201138_S_AT 201218_AT 201280_S_AT 201327_S_AT 201483_S_AT 201637_S_AT 201678_S_AT 201699_AT 202060_AT 202171_AT 202425_X_AT 202460_S_AT 202657_S_AT 202704_AT 202724_S_AT 203076_S_AT 203250_AT 203497_AT 203693_S_AT 204132_S_AT 205690_S_AT 206074_S_AT 206170_AT 206445_S_AT 207655_S_AT 208003_S_AT 208442_S_AT 208691_AT 208808_…
GO:BP	ATP biosynthetic process	GO:0006754	false	0.0098346	2.00724	102	574	13	21031	1553575_AT 201304_AT 201757_AT 201971_S_AT 202001_S_AT 202279_AT 202298_AT 202325_S_AT 203371_S_AT 207335_X_AT 208972_S_AT 218201_AT 1556064_AT
GO:BP	proteolysis involved in protein catabolic process	GO:0051603	false	0.0117007	1.93179	730	574	42	21031	1554868_S_AT 1569594_A_AT 201039_S_AT 201223_S_AT 201280_S_AT 201699_AT 201879_AT 201898_S_AT 202824_S_AT 205178_S_AT 208924_AT 209150_S_AT 212155_AT 217750_S_AT 218178_S_AT 218671_S_AT 219402_S_AT 222436_S_AT 225422_AT 225813_AT 226917_S_AT 229467_AT 229943_AT 234950_S_AT 235199_AT 45828_AT 1555330_AT 1559214_AT 1570251_AT 209334_S_AT 210867_AT 211444_AT 215384_S_AT 215402_AT 228942_S_AT 231269_…
GO:BP	sister chromatid segregation	GO:0000819	false	0.0132401	1.87811	230	574	20	21031	203087_S_AT 208442_S_AT 208946_S_AT 209150_S_AT 211989_AT 212132_AT 212264_S_AT 213251_AT 213746_S_AT 218178_S_AT 222436_S_AT 222479_S_AT 222737_S_AT 226917_S_AT 231848_X_AT 1557502_AT 228323_AT 235572_AT 236442_AT 236505_AT
GO:BP	post-translational protein modification	GO:0043687	false	0.013803	1.86003	1021	574	53	21031	1554078_S_AT 1554868_S_AT 1559078_AT 1568763_S_AT 201363_S_AT 201713_S_AT 201879_AT 201898_S_AT 202138_X_AT 202824_S_AT 203497_AT 205178_S_AT 208924_AT 210538_S_AT 212124_AT 212155_AT 215012_AT 217750_S_AT 218050_AT 218386_X_AT 219242_AT 219402_S_AT 223132_S_AT 224747_AT 224793_S_AT 225422_AT 225813_AT 225925_S_AT 226119_AT 226505_X_AT 226845_S_AT 226917_S_AT 229943_AT 234950_S_AT 235199_AT 23522…
GO:BP	nuclear transport	GO:0051169	false	0.0138833	1.85751	334	574	25	21031	1569594_A_AT 201138_S_AT 201713_S_AT 202097_AT 202425_X_AT 203497_AT 203519_S_AT 203693_S_AT 208864_S_AT 213746_S_AT 215936_S_AT 218050_AT 218482_AT 224068_X_AT 225107_AT 227728_AT 52169_AT 1555068_AT 1559006_AT 1559214_AT 1562110_AT 206921_AT 207092_AT 236505_AT 244030_AT
GO:BP	nucleocytoplasmic transport	GO:0006913	false	0.0138833	1.85751	334	574	25	21031	1569594_A_AT 201138_S_AT 201713_S_AT 202097_AT 202425_X_AT 203497_AT 203519_S_AT 203693_S_AT 208864_S_AT 213746_S_AT 215936_S_AT 218050_AT 218482_AT 224068_X_AT 225107_AT 227728_AT 52169_AT 1555068_AT 1559006_AT 1559214_AT 1562110_AT 206921_AT 207092_AT 236505_AT 244030_AT
GO:BP	positive regulation of biosynthetic process	GO:0009891	false	0.0139317	1.856	2706	574	111	21031	1554390_S_AT 1555756_A_AT 1559078_AT 1559946_S_AT 200679_X_AT 200970_S_AT 201138_S_AT 201218_AT 201280_S_AT 201327_S_AT 201483_S_AT 201637_S_AT 201678_S_AT 201699_AT 202060_AT 202171_AT 202425_X_AT 202460_S_AT 202657_S_AT 202704_AT 202724_S_AT 203076_S_AT 203250_AT 203497_AT 203693_S_AT 204132_S_AT 205690_S_AT 206074_S_AT 206170_AT 206445_S_AT 207655_S_AT 208003_S_AT 208442_S_AT 208691_AT 208808_…
GO:BP	proteasome-mediated ubiquitin-dependent protein catabolic process	GO:0043161	false	0.0139524	1.85535	400	574	28	21031	1554868_S_AT 1569594_A_AT 201039_S_AT 201223_S_AT 201280_S_AT 201699_AT 201879_AT 201898_S_AT 212155_AT 219402_S_AT 225422_AT 226917_S_AT 229467_AT 229943_AT 234950_S_AT 45828_AT 1555330_AT 1559214_AT 1570251_AT 211444_AT 215384_S_AT 215402_AT 231269_AT 232365_AT 236122_AT 238425_AT 241887_AT 244030_AT
GO:BP	electron transport chain	GO:0022900	false	0.0153934	1.81266	175	574	17	21031	1553575_AT 201304_AT 201568_AT 201754_AT 201757_AT 202001_S_AT 202110_AT 202233_S_AT 202298_AT 203371_S_AT 205849_S_AT 209095_AT 213846_AT 214259_S_AT 218201_AT 223281_S_AT 237121_AT
GO:BP	RNA localization	GO:0006403	false	0.0195674	1.70847	197	574	18	21031	1559946_S_AT 201138_S_AT 201327_S_AT 201713_S_AT 202097_AT 203519_S_AT 208442_S_AT 208863_S_AT 217872_AT 218482_AT 225107_AT 56256_AT 1555068_AT 1559006_AT 1562110_AT 206921_AT 209662_AT 236505_AT
GO:BP	purine nucleotide biosynthetic process	GO:0006164	false	0.020458	1.68914	257	574	21	21031	1553575_AT 201304_AT 201757_AT 201971_S_AT 202001_S_AT 202279_AT 202298_AT 202325_S_AT 203302_AT 203371_S_AT 203741_S_AT 204639_AT 207335_X_AT 208972_S_AT 209095_AT 218201_AT 221751_AT 239798_AT 1556064_AT 204348_S_AT 238856_S_AT
GO:BP	nucleoside triphosphate biosynthetic process	GO:0009142	false	0.0236558	1.62606	127	574	14	21031	1553575_AT 201304_AT 201757_AT 201971_S_AT 202001_S_AT 202279_AT 202298_AT 202325_S_AT 203371_S_AT 207335_X_AT 208972_S_AT 218201_AT 1556064_AT 204348_S_AT
GO:BP	positive regulation of lymphocyte activation	GO:0051251	true	0.0240472	1.61894	323	574	24	21031	1554078_S_AT 1555756_A_AT 200679_X_AT 201678_S_AT 202425_X_AT 202897_AT 204132_S_AT 204639_AT 205671_S_AT 208691_AT 210776_X_AT 211989_AT 212124_AT 218852_AT 222737_S_AT 222826_AT 232843_S_AT 1554306_AT 1554519_AT 202932_AT 207092_AT 217263_X_AT 239796_X_AT 241716_AT
GO:BP	positive regulation of cell activation	GO:0050867	false	0.0293115	1.53296	371	574	26	21031	1554078_S_AT 1555756_A_AT 200679_X_AT 201678_S_AT 202425_X_AT 202897_AT 204132_S_AT 204639_AT 205671_S_AT 208691_AT 210776_X_AT 211989_AT 212124_AT 213746_S_AT 218852_AT 222737_S_AT 222826_AT 232843_S_AT 1554306_AT 1554519_AT 202932_AT 207092_AT 211525_S_AT 217263_X_AT 239796_X_AT 241716_AT
GO:BP	negative regulation of nitrogen compound metabolic process	GO:0051172	false	0.0301448	1.52079	2202	574	93	21031	1552701_A_AT 1554021_A_AT 1554078_S_AT 1559078_AT 1559946_S_AT 200679_X_AT 200942_S_AT 201091_S_AT 201218_AT 201280_S_AT 201300_S_AT 201363_S_AT 201483_S_AT 201518_AT 201637_S_AT 202060_AT 202428_X_AT 202704_AT 202724_S_AT 202897_AT 203076_S_AT 203250_AT 203497_AT 204132_S_AT 206074_S_AT 206095_S_AT 208442_S_AT 208808_S_AT 208864_S_AT 209014_AT 209049_S_AT 209285_S_AT 209330_S_AT 209348_S_AT 2107…
GO:BP	transcription by RNA polymerase II	GO:0006366	false	0.0302508	1.51926	2691	574	109	21031	1553979_AT 1554021_A_AT 1554078_S_AT 1554390_S_AT 1559078_AT 1559946_S_AT 200050_AT 200679_X_AT 200942_S_AT 201091_S_AT 201218_AT 201280_S_AT 201483_S_AT 201518_AT 201699_AT 202060_AT 202171_AT 202425_X_AT 202460_S_AT 202724_S_AT 202824_S_AT 203076_S_AT 203250_AT 203497_AT 203693_S_AT 204132_S_AT 205594_AT 205690_S_AT 206074_S_AT 206170_AT 206829_X_AT 208003_S_AT 208066_S_AT 208442_S_AT 208808_S_…
GO:BP	purine ribonucleoside triphosphate biosynthetic process	GO:0009206	false	0.0307179	1.51261	113	574	13	21031	1553575_AT 201304_AT 201757_AT 201971_S_AT 202001_S_AT 202279_AT 202298_AT 202325_S_AT 203371_S_AT 207335_X_AT 208972_S_AT 218201_AT 1556064_AT
GO:BP	cellular respiration	GO:0045333	false	0.031869	1.49663	244	574	20	21031	1553575_AT 201304_AT 201568_AT 201754_AT 201757_AT 202001_S_AT 202110_AT 202233_S_AT 202298_AT 202325_S_AT 203371_S_AT 205849_S_AT 207335_X_AT 209095_AT 213846_AT 218201_AT 223281_S_AT 225892_AT 204348_S_AT 238856_S_AT
GO:BP	purine nucleoside triphosphate biosynthetic process	GO:0009145	false	0.0338217	1.4708	114	574	13	21031	1553575_AT 201304_AT 201757_AT 201971_S_AT 202001_S_AT 202279_AT 202298_AT 202325_S_AT 203371_S_AT 207335_X_AT 208972_S_AT 218201_AT 1556064_AT
GO:BP	purine-containing compound biosynthetic process	GO:0072522	false	0.034565	1.46136	266	574	21	21031	1553575_AT 201304_AT 201757_AT 201971_S_AT 202001_S_AT 202279_AT 202298_AT 202325_S_AT 203302_AT 203371_S_AT 203741_S_AT 204639_AT 207335_X_AT 208972_S_AT 209095_AT 218201_AT 221751_AT 239798_AT 1556064_AT 204348_S_AT 238856_S_AT
GO:BP	regulation of cellular component organization	GO:0051128	false	0.0361948	1.44135	2425	574	100	21031	1553678_A_AT 1554390_S_AT 1555756_A_AT 1559078_AT 1559946_S_AT 200679_X_AT 201280_S_AT 201300_S_AT 201327_S_AT 201637_S_AT 201699_AT 202146_AT 202425_X_AT 202657_S_AT 202897_AT 203250_AT 203474_AT 206170_AT 206875_S_AT 208442_S_AT 208691_AT 208728_S_AT 208946_S_AT 209049_S_AT 209150_S_AT 209217_S_AT 209285_S_AT 209330_S_AT 210276_S_AT 210312_S_AT 210962_S_AT 211986_AT 211989_AT 212264_S_AT 213251…
GO:BP	macromolecule catabolic process	GO:0009057	false	0.0397215	1.40097	1338	574	63	21031	1554868_S_AT 1569594_A_AT 201039_S_AT 201138_S_AT 201223_S_AT 201280_S_AT 201369_S_AT 201637_S_AT 201699_AT 201879_AT 201898_S_AT 202163_S_AT 202292_X_AT 202704_AT 202724_S_AT 202824_S_AT 203519_S_AT 203534_AT 205178_S_AT 208442_S_AT 208924_AT 208946_S_AT 209150_S_AT 209330_S_AT 211747_S_AT 212155_AT 213746_S_AT 217750_S_AT 218178_S_AT 218671_S_AT 219402_S_AT 222436_S_AT 225387_AT 225422_AT 22581…
GO:BP	catabolic process	GO:0009056	false	0.0415273	1.38167	2556	574	104	21031	1553678_A_AT 1554868_S_AT 1569594_A_AT 200679_X_AT 201039_S_AT 201138_S_AT 201223_S_AT 201280_S_AT 201369_S_AT 201384_S_AT 201637_S_AT 201699_AT 201879_AT 201898_S_AT 201971_S_AT 202163_S_AT 202292_X_AT 202460_S_AT 202704_AT 202724_S_AT 202824_S_AT 202888_S_AT 203519_S_AT 203534_AT 204132_S_AT 204484_AT 204639_AT 204837_AT 205178_S_AT 206170_AT 208442_S_AT 208924_AT 208935_S_AT 208946_S_AT 209095…
GO:BP	chromosome segregation	GO:0007059	true	0.0427635	1.36893	425	574	28	21031	1554390_S_AT 203087_S_AT 204838_S_AT 208066_S_AT 208442_S_AT 208728_S_AT 208946_S_AT 209150_S_AT 211989_AT 212132_AT 212264_S_AT 213251_AT 213746_S_AT 218178_S_AT 219242_AT 222436_S_AT 222479_S_AT 222737_S_AT 226917_S_AT 231848_X_AT 1557502_AT 228323_AT 228559_AT 235572_AT 236442_AT 236505_AT 236957_AT 244389_AT
GO:BP	mitotic cell cycle process	GO:1903047	true	0.0433709	1.3628	745	574	41	21031	1553678_A_AT 201369_S_AT 201898_S_AT 201930_AT 202425_X_AT 202770_S_AT 203087_S_AT 203474_AT 203693_S_AT 208442_S_AT 208728_S_AT 208946_S_AT 209150_S_AT 210776_X_AT 211989_AT 212132_AT 212264_S_AT 212415_AT 213251_AT 213746_S_AT 218007_S_AT 218178_S_AT 218386_X_AT 221711_S_AT 222436_S_AT 222479_S_AT 222737_S_AT 223133_AT 224652_AT 226917_S_AT 231848_X_AT 1555068_AT 1557502_AT 205288_AT 207851_S_A…
GO:BP	protein-containing complex disassembly	GO:0032984	true	0.0454123	1.34283	250	574	20	21031	203087_S_AT 203250_AT 206074_S_AT 206170_AT 208946_S_AT 209150_S_AT 210276_S_AT 211989_AT 218178_S_AT 222065_S_AT 222436_S_AT 222708_S_AT 224662_AT 1555068_AT 1570441_AT 205506_AT 207851_S_AT 215384_S_AT 241374_AT 242316_AT
GO:CC	cytoplasm	GO:0005737	true	4.22963e-24	23.3737	12345	594	455	22097	1552701_A_AT 1553575_AT 1553678_A_AT 1554078_S_AT 1554390_S_AT 1555756_A_AT 1559078_AT 1559946_S_AT 1568763_S_AT 1569594_A_AT 200050_AT 200679_X_AT 200942_S_AT 200970_S_AT 201039_S_AT 201138_S_AT 201175_AT 201218_AT 201223_S_AT 201266_AT 201280_S_AT 201300_S_AT 201304_AT 201327_S_AT 201363_S_AT 201369_S_AT 201376_S_AT 201384_S_AT 201408_AT 201568_AT 201569_S_AT 201595_S_AT 201626_AT 201637_S_AT 2…
GO:CC	membrane-bounded organelle	GO:0043227	false	2.71402e-18	17.5664	15671	594	516	22097	1553575_AT 1553678_A_AT 1553979_AT 1554021_A_AT 1554078_S_AT 1554390_S_AT 1554868_S_AT 1559078_AT 1559946_S_AT 1567214_A_AT 1568763_S_AT 1569594_A_AT 200050_AT 200679_X_AT 200942_S_AT 200970_S_AT 201039_S_AT 201091_S_AT 201138_S_AT 201175_AT 201218_AT 201223_S_AT 201266_AT 201280_S_AT 201300_S_AT 201304_AT 201327_S_AT 201363_S_AT 201369_S_AT 201376_S_AT 201384_S_AT 201408_AT 201483_S_AT 201518_AT…
GO:CC	nucleoplasm	GO:0005654	false	4.76256e-18	17.3222	4220	594	208	22097	1554021_A_AT 1554868_S_AT 1559078_AT 1559946_S_AT 1567214_A_AT 1568763_S_AT 200679_X_AT 200942_S_AT 201039_S_AT 201091_S_AT 201223_S_AT 201266_AT 201363_S_AT 201376_S_AT 201384_S_AT 201408_AT 201483_S_AT 201518_AT 201687_S_AT 201699_AT 201713_S_AT 201879_AT 201898_S_AT 201930_AT 201971_S_AT 202041_S_AT 202060_AT 202097_AT 202171_AT 202209_AT 202292_X_AT 202425_X_AT 202657_S_AT 202724_S_AT 202776_…
GO:CC	intracellular membrane-bounded organelle	GO:0043231	false	7.00703e-18	17.1545	14605	594	492	22097	1553575_AT 1553678_A_AT 1553979_AT 1554021_A_AT 1554078_S_AT 1554390_S_AT 1554868_S_AT 1559078_AT 1559946_S_AT 1567214_A_AT 1568763_S_AT 1569594_A_AT 200050_AT 200679_X_AT 200942_S_AT 200970_S_AT 201039_S_AT 201091_S_AT 201138_S_AT 201175_AT 201218_AT 201223_S_AT 201266_AT 201280_S_AT 201300_S_AT 201304_AT 201363_S_AT 201369_S_AT 201376_S_AT 201384_S_AT 201408_AT 201483_S_AT 201518_AT 201568_AT 2…
GO:CC	organelle	GO:0043226	false	1.3477e-14	13.8704	16808	594	531	22097	1553575_AT 1553678_A_AT 1553979_AT 1554021_A_AT 1554078_S_AT 1554390_S_AT 1554868_S_AT 1559078_AT 1559946_S_AT 1567214_A_AT 1568763_S_AT 1569594_A_AT 200050_AT 200679_X_AT 200942_S_AT 200970_S_AT 201039_S_AT 201091_S_AT 201138_S_AT 201175_AT 201218_AT 201223_S_AT 201266_AT 201280_S_AT 201300_S_AT 201304_AT 201327_S_AT 201363_S_AT 201369_S_AT 201376_S_AT 201384_S_AT 201408_AT 201483_S_AT 201518_AT…
GO:CC	cytosol	GO:0005829	false	2.84122e-14	13.5465	5487	594	238	22097	1552701_A_AT 1554078_S_AT 1554390_S_AT 1559078_AT 1559946_S_AT 1568763_S_AT 1569594_A_AT 200050_AT 200942_S_AT 200970_S_AT 201039_S_AT 201138_S_AT 201218_AT 201223_S_AT 201266_AT 201280_S_AT 201300_S_AT 201327_S_AT 201363_S_AT 201376_S_AT 201384_S_AT 201408_AT 201595_S_AT 201637_S_AT 201699_AT 201713_S_AT 201879_AT 201898_S_AT 201971_S_AT 202097_AT 202138_X_AT 202163_S_AT 202209_AT 202292_X_AT 20…
GO:CC	intracellular organelle	GO:0043229	false	1.38286e-13	12.8592	16018	594	512	22097	1553575_AT 1553678_A_AT 1553979_AT 1554021_A_AT 1554078_S_AT 1554390_S_AT 1554868_S_AT 1559078_AT 1559946_S_AT 1567214_A_AT 1568763_S_AT 1569594_A_AT 200050_AT 200679_X_AT 200942_S_AT 200970_S_AT 201039_S_AT 201091_S_AT 201138_S_AT 201175_AT 201218_AT 201223_S_AT 201266_AT 201280_S_AT 201300_S_AT 201304_AT 201327_S_AT 201363_S_AT 201369_S_AT 201376_S_AT 201384_S_AT 201408_AT 201483_S_AT 201518_AT…
GO:CC	catalytic complex	GO:1902494	false	1.20887e-12	11.9176	1776	594	106	22097	1553575_AT 1559078_AT 1559946_S_AT 1567214_A_AT 1568763_S_AT 201039_S_AT 201223_S_AT 201304_AT 201376_S_AT 201408_AT 201568_AT 201699_AT 201713_S_AT 201754_AT 201757_AT 201879_AT 201898_S_AT 201971_S_AT 202001_S_AT 202060_AT 202110_AT 202138_X_AT 202209_AT 202233_S_AT 202279_AT 202298_AT 202325_S_AT 202425_X_AT 202673_AT 202770_S_AT 202824_S_AT 203316_S_AT 203371_S_AT 203497_AT 204484_AT 205644_S…
GO:CC	membrane-enclosed lumen	GO:0031974	false	2.77488e-12	11.5568	6657	594	267	22097	1554021_A_AT 1554078_S_AT 1554390_S_AT 1554868_S_AT 1559078_AT 1559946_S_AT 1567214_A_AT 1568763_S_AT 200050_AT 200679_X_AT 200942_S_AT 201039_S_AT 201091_S_AT 201223_S_AT 201266_AT 201280_S_AT 201363_S_AT 201376_S_AT 201384_S_AT 201408_AT 201483_S_AT 201518_AT 201637_S_AT 201687_S_AT 201699_AT 201713_S_AT 201757_AT 201879_AT 201898_S_AT 201930_AT 201971_S_AT 202041_S_AT 202060_AT 202097_AT 20217…
GO:CC	organelle lumen	GO:0043233	false	2.77488e-12	11.5568	6657	594	267	22097	1554021_A_AT 1554078_S_AT 1554390_S_AT 1554868_S_AT 1559078_AT 1559946_S_AT 1567214_A_AT 1568763_S_AT 200050_AT 200679_X_AT 200942_S_AT 201039_S_AT 201091_S_AT 201223_S_AT 201266_AT 201280_S_AT 201363_S_AT 201376_S_AT 201384_S_AT 201408_AT 201483_S_AT 201518_AT 201637_S_AT 201687_S_AT 201699_AT 201713_S_AT 201757_AT 201879_AT 201898_S_AT 201930_AT 201971_S_AT 202041_S_AT 202060_AT 202097_AT 20217…
GO:CC	intracellular organelle lumen	GO:0070013	false	2.77488e-12	11.5568	6657	594	267	22097	1554021_A_AT 1554078_S_AT 1554390_S_AT 1554868_S_AT 1559078_AT 1559946_S_AT 1567214_A_AT 1568763_S_AT 200050_AT 200679_X_AT 200942_S_AT 201039_S_AT 201091_S_AT 201223_S_AT 201266_AT 201280_S_AT 201363_S_AT 201376_S_AT 201384_S_AT 201408_AT 201483_S_AT 201518_AT 201637_S_AT 201687_S_AT 201699_AT 201713_S_AT 201757_AT 201879_AT 201898_S_AT 201930_AT 201971_S_AT 202041_S_AT 202060_AT 202097_AT 20217…
GO:CC	intracellular anatomical structure	GO:0005622	false	3.15515e-12	11.501	17834	594	546	22097	1552701_A_AT 1553575_AT 1553678_A_AT 1553979_AT 1554021_A_AT 1554078_S_AT 1554390_S_AT 1554868_S_AT 1555756_A_AT 1559078_AT 1559946_S_AT 1567214_A_AT 1568763_S_AT 1569594_A_AT 200050_AT 200679_X_AT 200942_S_AT 200970_S_AT 201039_S_AT 201091_S_AT 201138_S_AT 201175_AT 201218_AT 201223_S_AT 201266_AT 201280_S_AT 201300_S_AT 201304_AT 201327_S_AT 201363_S_AT 201369_S_AT 201376_S_AT 201384_S_AT 20140…
GO:CC	nuclear lumen	GO:0031981	false	1.63428e-11	10.7867	5521	594	230	22097	1554021_A_AT 1554868_S_AT 1559078_AT 1559946_S_AT 1567214_A_AT 1568763_S_AT 200050_AT 200679_X_AT 200942_S_AT 201039_S_AT 201091_S_AT 201223_S_AT 201266_AT 201280_S_AT 201363_S_AT 201376_S_AT 201384_S_AT 201408_AT 201483_S_AT 201518_AT 201637_S_AT 201687_S_AT 201699_AT 201713_S_AT 201879_AT 201898_S_AT 201930_AT 201971_S_AT 202041_S_AT 202060_AT 202097_AT 202171_AT 202209_AT 202292_X_AT 202425_X_…
GO:CC	organelle membrane	GO:0031090	false	3.35463e-08	7.47436	3770	594	163	22097	1553575_AT 1553678_A_AT 1568763_S_AT 200970_S_AT 201091_S_AT 201175_AT 201280_S_AT 201300_S_AT 201304_AT 201384_S_AT 201568_AT 201569_S_AT 201626_AT 201713_S_AT 201754_AT 201757_AT 201917_S_AT 201971_S_AT 202001_S_AT 202097_AT 202110_AT 202233_S_AT 202279_AT 202298_AT 202325_S_AT 202460_S_AT 202673_AT 202798_AT 202888_S_AT 202897_AT 202918_S_AT 203371_S_AT 203474_AT 203781_AT 204132_S_AT 204396_S…
GO:CC	mitochondrion	GO:0005739	false	4.59335e-07	6.33787	1689	594	88	22097	1553575_AT 1554078_S_AT 201175_AT 201266_AT 201304_AT 201384_S_AT 201568_AT 201569_S_AT 201754_AT 201757_AT 201917_S_AT 202001_S_AT 202041_S_AT 202110_AT 202233_S_AT 202279_AT 202298_AT 202325_S_AT 202425_X_AT 202724_S_AT 203302_AT 203371_S_AT 203781_AT 204132_S_AT 205133_S_AT 205681_AT 205849_S_AT 207335_X_AT 208946_S_AT 208972_S_AT 209095_AT 209623_AT 212591_AT 212603_AT 213396_S_AT 213846_AT 2…
GO:CC	mitochondrial protein-containing complex	GO:0098798	false	1.59493e-06	5.79726	306	594	29	22097	1553575_AT 201304_AT 201568_AT 201569_S_AT 201754_AT 201757_AT 202001_S_AT 202110_AT 202233_S_AT 202279_AT 202298_AT 202325_S_AT 203371_S_AT 203781_AT 205849_S_AT 207335_X_AT 208972_S_AT 209095_AT 209623_AT 212603_AT 213846_AT 218201_AT 218357_S_AT 222997_S_AT 223480_S_AT 224671_AT 225260_S_AT 239798_AT 45828_AT
GO:CC	envelope	GO:0031975	false	7.32909e-06	5.13495	1299	594	70	22097	1553575_AT 201091_S_AT 201175_AT 201300_S_AT 201304_AT 201384_S_AT 201568_AT 201569_S_AT 201637_S_AT 201713_S_AT 201754_AT 201757_AT 201917_S_AT 202001_S_AT 202097_AT 202110_AT 202233_S_AT 202279_AT 202298_AT 202325_S_AT 203371_S_AT 203675_AT 203781_AT 204132_S_AT 204396_S_AT 205681_AT 205849_S_AT 207335_X_AT 208946_S_AT 208972_S_AT 209150_S_AT 212603_AT 213846_AT 217772_S_AT 218178_S_AT 218201_A…
GO:CC	organelle envelope	GO:0031967	false	7.32909e-06	5.13495	1299	594	70	22097	1553575_AT 201091_S_AT 201175_AT 201300_S_AT 201304_AT 201384_S_AT 201568_AT 201569_S_AT 201637_S_AT 201713_S_AT 201754_AT 201757_AT 201917_S_AT 202001_S_AT 202097_AT 202110_AT 202233_S_AT 202279_AT 202298_AT 202325_S_AT 203371_S_AT 203675_AT 203781_AT 204132_S_AT 204396_S_AT 205681_AT 205849_S_AT 207335_X_AT 208946_S_AT 208972_S_AT 209150_S_AT 212603_AT 213846_AT 217772_S_AT 218178_S_AT 218201_A…
GO:CC	mitochondrial respirasome	GO:0005746	false	1.33962e-05	4.87302	96	594	15	22097	1553575_AT 201304_AT 201568_AT 201754_AT 201757_AT 202001_S_AT 202110_AT 202233_S_AT 202298_AT 203371_S_AT 205849_S_AT 213846_AT 218201_AT 223281_S_AT 45828_AT
GO:CC	inner mitochondrial membrane protein complex	GO:0098800	false	2.629e-05	4.58021	162	594	19	22097	1553575_AT 201304_AT 201568_AT 201569_S_AT 201754_AT 201757_AT 202001_S_AT 202110_AT 202233_S_AT 202279_AT 202298_AT 202325_S_AT 203371_S_AT 205849_S_AT 207335_X_AT 208972_S_AT 213846_AT 218201_AT 45828_AT
GO:CC	respirasome	GO:0070469	false	4.00836e-05	4.39703	104	594	15	22097	1553575_AT 201304_AT 201568_AT 201754_AT 201757_AT 202001_S_AT 202110_AT 202233_S_AT 202298_AT 203371_S_AT 205849_S_AT 213846_AT 218201_AT 223281_S_AT 45828_AT
GO:CC	respiratory chain complex	GO:0098803	false	6.11715e-05	4.21345	93	594	14	22097	1553575_AT 201304_AT 201568_AT 201754_AT 201757_AT 202001_S_AT 202110_AT 202233_S_AT 202298_AT 203371_S_AT 205849_S_AT 213846_AT 218201_AT 45828_AT
GO:CC	mitochondrial inner membrane	GO:0005743	false	0.000165643	3.78083	512	594	35	22097	1553575_AT 201304_AT 201568_AT 201569_S_AT 201754_AT 201757_AT 201917_S_AT 202001_S_AT 202110_AT 202233_S_AT 202279_AT 202298_AT 202325_S_AT 203371_S_AT 203781_AT 205849_S_AT 207335_X_AT 208972_S_AT 212603_AT 213846_AT 218201_AT 218357_S_AT 220094_S_AT 222997_S_AT 223157_AT 223281_S_AT 223480_S_AT 224671_AT 225260_S_AT 226006_AT 45828_AT 1563708_AT 230457_AT 232245_AT 241716_AT
GO:CC	nucleus	GO:0005634	false	0.000381363	3.41866	10074	594	328	22097	1553979_AT 1554021_A_AT 1554078_S_AT 1554390_S_AT 1554868_S_AT 1559078_AT 1559946_S_AT 1567214_A_AT 1568763_S_AT 1569594_A_AT 200050_AT 200679_X_AT 200942_S_AT 201039_S_AT 201091_S_AT 201138_S_AT 201218_AT 201223_S_AT 201266_AT 201280_S_AT 201300_S_AT 201363_S_AT 201369_S_AT 201376_S_AT 201384_S_AT 201408_AT 201483_S_AT 201518_AT 201595_S_AT 201637_S_AT 201687_S_AT 201699_AT 201713_S_AT 201879_AT…
GO:CC	mitochondrial envelope	GO:0005740	false	0.000470608	3.32734	831	594	47	22097	1553575_AT 201175_AT 201304_AT 201384_S_AT 201568_AT 201569_S_AT 201754_AT 201757_AT 201917_S_AT 202001_S_AT 202110_AT 202233_S_AT 202279_AT 202298_AT 202325_S_AT 203371_S_AT 203781_AT 204132_S_AT 205681_AT 205849_S_AT 207335_X_AT 208946_S_AT 208972_S_AT 212603_AT 213846_AT 217772_S_AT 218201_AT 218357_S_AT 220094_S_AT 222997_S_AT 223133_AT 223157_AT 223281_S_AT 223480_S_AT 224671_AT 224693_AT 22…
GO:CC	mitochondrial membrane	GO:0031966	false	0.000501688	3.29957	782	594	45	22097	1553575_AT 201175_AT 201304_AT 201568_AT 201569_S_AT 201754_AT 201757_AT 201917_S_AT 202001_S_AT 202110_AT 202233_S_AT 202279_AT 202298_AT 202325_S_AT 203371_S_AT 203781_AT 204132_S_AT 205681_AT 205849_S_AT 207335_X_AT 208946_S_AT 208972_S_AT 212603_AT 213846_AT 217772_S_AT 218201_AT 218357_S_AT 220094_S_AT 222997_S_AT 223133_AT 223157_AT 223281_S_AT 223480_S_AT 224671_AT 224693_AT 225260_S_AT 22…
GO:CC	organelle inner membrane	GO:0019866	false	0.000669991	3.17393	568	594	36	22097	1553575_AT 201091_S_AT 201304_AT 201568_AT 201569_S_AT 201754_AT 201757_AT 201917_S_AT 202001_S_AT 202110_AT 202233_S_AT 202279_AT 202298_AT 202325_S_AT 203371_S_AT 203781_AT 205849_S_AT 207335_X_AT 208972_S_AT 212603_AT 213846_AT 218201_AT 218357_S_AT 220094_S_AT 222997_S_AT 223157_AT 223281_S_AT 223480_S_AT 224671_AT 225260_S_AT 226006_AT 45828_AT 1563708_AT 230457_AT 232245_AT 241716_AT
GO:CC	spliceosomal complex	GO:0005681	false	0.00107573	2.9683	206	594	19	22097	1567214_A_AT 201363_S_AT 201376_S_AT 201687_S_AT 202209_AT 203316_S_AT 205644_S_AT 205690_S_AT 208863_S_AT 210588_X_AT 211747_S_AT 212721_AT 223067_AT 223416_AT 224068_X_AT 224781_S_AT 225107_AT 230413_S_AT 231718_AT
GO:CC	catalytic step 2 spliceosome	GO:0071013	false	0.00151006	2.821	89	594	12	22097	1567214_A_AT 201376_S_AT 202209_AT 203316_S_AT 205644_S_AT 205690_S_AT 208863_S_AT 223067_AT 223416_AT 224068_X_AT 225107_AT 231718_AT
GO:CC	nuclear body	GO:0016604	false	0.0015587	2.80724	895	594	48	22097	1554868_S_AT 1559078_AT 1567214_A_AT 201384_S_AT 201518_AT 201687_S_AT 201879_AT 202041_S_AT 202060_AT 203087_S_AT 204396_S_AT 205178_S_AT 206095_S_AT 208066_S_AT 208863_S_AT 208946_S_AT 208993_S_AT 211257_X_AT 212721_AT 215012_AT 218131_S_AT 221711_S_AT 222473_S_AT 223067_AT 223132_S_AT 223160_S_AT 225107_AT 225326_AT 227277_AT 231718_AT 233380_S_AT 234950_S_AT 242735_X_AT 1555317_AT 1557502_AT …
GO:CC	chromosomal region	GO:0098687	true	0.00458244	2.3389	402	594	27	22097	201091_S_AT 201138_S_AT 201408_AT 201518_AT 201930_AT 208066_S_AT 208442_S_AT 209150_S_AT 209814_AT 210276_S_AT 211989_AT 212264_S_AT 212415_AT 213251_AT 218178_S_AT 222436_S_AT 222479_S_AT 222737_S_AT 225107_AT 231848_X_AT 1557502_AT 208572_AT 220085_AT 228323_AT 228559_AT 235160_AT 235572_AT
GO:CC	transferase complex	GO:1990234	false	0.0131588	1.88078	890	594	45	22097	1559946_S_AT 1568763_S_AT 201713_S_AT 201879_AT 201898_S_AT 202060_AT 202673_AT 202770_S_AT 202824_S_AT 203316_S_AT 203497_AT 204484_AT 205644_S_AT 206445_S_AT 208066_S_AT 208924_AT 208946_S_AT 209095_AT 209181_S_AT 213357_AT 218482_AT 219402_S_AT 222104_X_AT 222415_AT 223187_S_AT 223269_AT 224129_S_AT 224652_AT 224793_S_AT 225422_AT 226119_AT 226917_S_AT 234950_S_AT 235009_AT 45828_AT 52169_AT 1…
GO:CC	protein-containing complex	GO:0032991	false	0.0131709	1.88038	8588	594	278	22097	1552701_A_AT 1553575_AT 1553678_A_AT 1554390_S_AT 1559078_AT 1559946_S_AT 1567214_A_AT 1568763_S_AT 1569594_A_AT 200679_X_AT 201039_S_AT 201091_S_AT 201138_S_AT 201218_AT 201223_S_AT 201304_AT 201327_S_AT 201363_S_AT 201369_S_AT 201376_S_AT 201384_S_AT 201408_AT 201483_S_AT 201518_AT 201568_AT 201569_S_AT 201626_AT 201687_S_AT 201699_AT 201713_S_AT 201754_AT 201757_AT 201879_AT 201898_S_AT 201930…
GO:CC	oxidoreductase complex	GO:1990204	false	0.0191364	1.71814	132	594	13	22097	1553575_AT 201304_AT 201568_AT 201757_AT 202001_S_AT 202233_S_AT 202298_AT 203371_S_AT 205849_S_AT 209095_AT 218201_AT 239798_AT 45828_AT
GO:CC	ATPase complex	GO:1904949	false	0.0225993	1.64591	153	594	14	22097	1559078_AT 1559946_S_AT 201971_S_AT 202279_AT 202325_S_AT 207335_X_AT 208972_S_AT 211989_AT 213251_AT 218131_S_AT 222737_S_AT 1553989_A_AT 235864_AT 236442_AT
GO:CC	respiratory chain complex I	GO:0045271	false	0.0261132	1.58314	53	594	8	22097	1553575_AT 201304_AT 201757_AT 202001_S_AT 202298_AT 203371_S_AT 218201_AT 45828_AT
GO:CC	NADH dehydrogenase complex	GO:0030964	false	0.0261132	1.58314	53	594	8	22097	1553575_AT 201304_AT 201757_AT 202001_S_AT 202298_AT 203371_S_AT 218201_AT 45828_AT
GO:CC	mitochondrial respiratory chain complex I	GO:0005747	false	0.0261132	1.58314	53	594	8	22097	1553575_AT 201304_AT 201757_AT 202001_S_AT 202298_AT 203371_S_AT 218201_AT 45828_AT
GO:CC	chromosome centromeric region	GO:0000775	false	0.026752	1.57264	259	594	19	22097	201091_S_AT 201518_AT 208066_S_AT 209150_S_AT 209814_AT 211989_AT 212264_S_AT 212415_AT 213251_AT 218178_S_AT 222436_S_AT 222479_S_AT 222737_S_AT 231848_X_AT 1557502_AT 220085_AT 228323_AT 228559_AT 235572_AT
GO:CC	cytochrome complex	GO:0070069	false	0.0277715	1.5564	40	594	7	22097	201568_AT 201754_AT 202110_AT 202233_S_AT 205849_S_AT 213846_AT 223281_S_AT
GO:CC	chromosome	GO:0005694	false	0.0296896	1.5274	1949	594	80	22097	1554390_S_AT 1559078_AT 1559946_S_AT 200679_X_AT 201091_S_AT 201138_S_AT 201408_AT 201518_AT 201678_S_AT 201898_S_AT 201930_AT 202060_AT 202724_S_AT 202776_AT 203076_S_AT 203497_AT 203693_S_AT 204132_S_AT 204838_S_AT 205178_S_AT 205690_S_AT 206074_S_AT 208003_S_AT 208066_S_AT 208442_S_AT 208808_S_AT 209014_AT 209049_S_AT 209150_S_AT 209285_S_AT 209348_S_AT 209814_AT 210276_S_AT 210776_X_AT 211989…
GO:CC	intracellular protein-containing complex	GO:0140535	false	0.0309429	1.50944	951	594	46	22097	1559946_S_AT 1568763_S_AT 201039_S_AT 201223_S_AT 201327_S_AT 201699_AT 201879_AT 201898_S_AT 202060_AT 202138_X_AT 202163_S_AT 202425_X_AT 202673_AT 202704_AT 202824_S_AT 203087_S_AT 203497_AT 208066_S_AT 208924_AT 213357_AT 215936_S_AT 217971_AT 218482_AT 219402_S_AT 222104_X_AT 222826_AT 223269_AT 225049_AT 225123_AT 225422_AT 226119_AT 226917_S_AT 227116_AT 234950_S_AT 45828_AT 52169_AT 15559…
GO:CC	endomembrane system	GO:0012505	true	0.0440764	1.35579	4777	594	166	22097	1553678_A_AT 1554390_S_AT 1568763_S_AT 200679_X_AT 200970_S_AT 201039_S_AT 201091_S_AT 201175_AT 201280_S_AT 201300_S_AT 201384_S_AT 201626_AT 201637_S_AT 201713_S_AT 201971_S_AT 202041_S_AT 202097_AT 202292_X_AT 202428_X_AT 202460_S_AT 202673_AT 202798_AT 202888_S_AT 202897_AT 202918_S_AT 203310_AT 203474_AT 203675_AT 204396_S_AT 204484_AT 204619_S_AT 204837_AT 205118_AT 205671_S_AT 206170_AT 20…
GO:CC	membrane protein complex	GO:0098796	false	0.0462054	1.33531	1401	594	61	22097	1553575_AT 1553678_A_AT 1568763_S_AT 200679_X_AT 201304_AT 201568_AT 201569_S_AT 201626_AT 201754_AT 201757_AT 201971_S_AT 202001_S_AT 202110_AT 202233_S_AT 202279_AT 202298_AT 202325_S_AT 202798_AT 203371_S_AT 204484_AT 205671_S_AT 205849_S_AT 207335_X_AT 208691_AT 208946_S_AT 208972_S_AT 210962_S_AT 211986_AT 213475_S_AT 213746_S_AT 213846_AT 217887_S_AT 217971_AT 218057_X_AT 218178_S_AT 218201…
GO:CC	membrane	GO:0016020	false	0.0493888	1.30637	9864	594	309	22097	1552426_A_AT 1553575_AT 1553678_A_AT 1554078_S_AT 1554390_S_AT 1555756_A_AT 1559946_S_AT 1567214_A_AT 1568763_S_AT 200679_X_AT 200970_S_AT 201091_S_AT 201175_AT 201280_S_AT 201300_S_AT 201304_AT 201376_S_AT 201384_S_AT 201568_AT 201569_S_AT 201626_AT 201637_S_AT 201687_S_AT 201699_AT 201713_S_AT 201754_AT 201757_AT 201917_S_AT 201971_S_AT 202001_S_AT 202041_S_AT 202097_AT 202110_AT 202138_X_AT 20…
KEGG	Oxidative phosphorylation	KEGG:00190	false	2.94905e-06	5.53032	134	293	20	8484	1553575_AT 201304_AT 201568_AT 201754_AT 201757_AT 201971_S_AT 202001_S_AT 202110_AT 202233_S_AT 202298_AT 202325_S_AT 203371_S_AT 205849_S_AT 207335_X_AT 208972_S_AT 213846_AT 218201_AT 223281_S_AT 1553989_A_AT 235864_AT
KEGG	Amyotrophic lateral sclerosis	KEGG:05014	false	0.00211002	2.67571	363	293	29	8484	1553575_AT 201304_AT 201568_AT 201699_AT 201713_S_AT 201754_AT 201757_AT 202001_S_AT 202097_AT 202110_AT 202233_S_AT 202298_AT 202325_S_AT 202425_X_AT 203371_S_AT 205849_S_AT 208946_S_AT 208972_S_AT 213846_AT 218201_AT 219402_S_AT 224662_AT 225107_AT 1559006_AT 206921_AT 209334_S_AT 236505_AT 238425_AT 243802_AT
KEGG	Diabetic cardiomyopathy	KEGG:05415	false	0.00216814	2.66391	202	293	20	8484	1553575_AT 201304_AT 201408_AT 201568_AT 201754_AT 201757_AT 202001_S_AT 202110_AT 202233_S_AT 202298_AT 202325_S_AT 203076_S_AT 203371_S_AT 205849_S_AT 208972_S_AT 213846_AT 218201_AT 224793_S_AT 1556064_AT 207851_S_AT
KEGG	Thermogenesis	KEGG:04714	false	0.00518455	2.28529	232	293	21	8484	1553575_AT 201304_AT 201568_AT 201754_AT 201757_AT 202001_S_AT 202110_AT 202233_S_AT 202298_AT 202325_S_AT 203371_S_AT 203741_S_AT 205849_S_AT 207335_X_AT 208972_S_AT 211989_AT 213846_AT 218201_AT 223281_S_AT 230379_X_AT 236442_AT
KEGG	Non-alcoholic fatty liver disease	KEGG:04932	false	0.00826799	2.0826	154	293	16	8484	201304_AT 201568_AT 201754_AT 201757_AT 202001_S_AT 202110_AT 202233_S_AT 202298_AT 203371_S_AT 205849_S_AT 208728_S_AT 213846_AT 218201_AT 1556064_AT 207092_AT 207851_S_AT
KEGG	Prion disease	KEGG:05020	false	0.0173552	1.76057	271	293	22	8484	1553575_AT 201300_S_AT 201304_AT 201568_AT 201699_AT 201754_AT 201757_AT 202001_S_AT 202110_AT 202233_S_AT 202298_AT 202325_S_AT 202425_X_AT 203371_S_AT 205849_S_AT 208972_S_AT 213846_AT 218201_AT 224662_AT 205485_AT 209334_S_AT 238425_AT
KEGG	Parkinson disease	KEGG:05012	false	0.0339678	1.46893	265	293	21	8484	1553575_AT 201304_AT 201568_AT 201699_AT 201754_AT 201757_AT 202001_S_AT 202110_AT 202233_S_AT 202298_AT 202325_S_AT 203371_S_AT 205849_S_AT 208864_S_AT 208972_S_AT 213846_AT 218201_AT 224662_AT 209334_S_AT 237106_AT 238425_AT
REAC	The citric acid (TCA) cycle and respiratory electron transport	REAC:R-HSA-1428517	false	0.000149408	3.82563	177	385	22	10842	1553575_AT 201304_AT 201568_AT 201754_AT 201757_AT 202001_S_AT 202110_AT 202233_S_AT 202298_AT 202325_S_AT 203371_S_AT 205849_S_AT 207335_X_AT 208972_S_AT 209095_AT 213846_AT 218201_AT 222572_AT 239798_AT 1570339_X_AT 230379_X_AT 232861_AT
REAC	Respiratory electron transport ATP synthesis by chemiosmotic coupling and heat production by uncoupling proteins.	REAC:R-HSA-163200	false	0.00121363	2.91591	127	385	17	10842	1553575_AT 201304_AT 201568_AT 201754_AT 201757_AT 202001_S_AT 202110_AT 202233_S_AT 202298_AT 202325_S_AT 203371_S_AT 205849_S_AT 207335_X_AT 208972_S_AT 213846_AT 218201_AT 230379_X_AT
REAC	Processing of Capped Intron-Containing Pre-mRNA	REAC:R-HSA-72203	false	0.0027779	2.55628	276	385	26	10842	1567214_A_AT 201376_S_AT 201713_S_AT 202097_AT 202209_AT 203316_S_AT 205644_S_AT 205690_S_AT 206095_S_AT 208863_S_AT 208993_S_AT 209330_S_AT 211747_S_AT 222035_S_AT 223067_AT 223416_AT 224068_X_AT 224781_S_AT 225107_AT 229467_AT 230413_S_AT 231718_AT 1559006_AT 206921_AT 233405_AT 236505_AT
REAC	Respiratory electron transport	REAC:R-HSA-611105	false	0.0079133	2.10164	103	385	14	10842	1553575_AT 201304_AT 201568_AT 201754_AT 201757_AT 202001_S_AT 202110_AT 202233_S_AT 202298_AT 203371_S_AT 205849_S_AT 213846_AT 218201_AT 230379_X_AT
WP	Electron transport chain OXPHOS system in mitochondria	WP:WP111	false	3.99579e-06	5.3984	104	293	18	8286	1553575_AT 201304_AT 201568_AT 201754_AT 201757_AT 202001_S_AT 202110_AT 202233_S_AT 202298_AT 202325_S_AT 203371_S_AT 205849_S_AT 207335_X_AT 208972_S_AT 213846_AT 218201_AT 218671_S_AT 223281_S_AT
WP	Nonalcoholic fatty liver disease	WP:WP4396	false	0.020242	1.69375	153	293	16	8286	201304_AT 201568_AT 201754_AT 201757_AT 202001_S_AT 202110_AT 202233_S_AT 202298_AT 203371_S_AT 205849_S_AT 208728_S_AT 213846_AT 218201_AT 1556064_AT 207092_AT 207851_S_AT
WP	Mitochondrial complex I assembly model OXPHOS system	WP:WP4324	false	0.0284129	1.54649	56	293	9	8286	1553575_AT 201304_AT 201757_AT 202001_S_AT 202298_AT 203371_S_AT 218201_AT 45828_AT 230379_X_AT
TF	Factor: ZF5; motif: GSGCGCGR; match class: 1	TF:M00716_1	false	1.05045e-12	11.9786	14519	604	520	20045	1552426_A_AT 1553678_A_AT 1553979_AT 1554021_A_AT 1554078_S_AT 1554390_S_AT 1554868_S_AT 1559078_AT 1559946_S_AT 1567214_A_AT 1568763_S_AT 1569594_A_AT 200050_AT 200679_X_AT 200942_S_AT 200970_S_AT 201039_S_AT 201091_S_AT 201138_S_AT 201175_AT 201218_AT 201223_S_AT 201266_AT 201280_S_AT 201300_S_AT 201327_S_AT 201363_S_AT 201369_S_AT 201376_S_AT 201384_S_AT 201408_AT 201483_S_AT 201518_AT 201568_…
TF	Factor: ZF5; motif: GGSGCGCGS; match class: 1	TF:M10438_1	false	2.5614e-12	11.5915	15279	604	537	20045	1552426_A_AT 1553678_A_AT 1553979_AT 1554021_A_AT 1554078_S_AT 1554390_S_AT 1554868_S_AT 1559078_AT 1559946_S_AT 1567214_A_AT 1568763_S_AT 1569594_A_AT 200050_AT 200679_X_AT 200942_S_AT 200970_S_AT 201039_S_AT 201091_S_AT 201138_S_AT 201218_AT 201223_S_AT 201266_AT 201280_S_AT 201300_S_AT 201327_S_AT 201363_S_AT 201369_S_AT 201376_S_AT 201384_S_AT 201408_AT 201483_S_AT 201518_AT 201568_AT 201569_…
TF	Factor: E2F4; motif: YCCCGCCNCNNSSNNSNN; match class: 1	TF:M12599_1	false	1.80897e-11	10.7426	16076	604	553	20045	1552426_A_AT 1553678_A_AT 1553979_AT 1554021_A_AT 1554078_S_AT 1554390_S_AT 1554868_S_AT 1559078_AT 1559946_S_AT 1567214_A_AT 1568763_S_AT 1569594_A_AT 200050_AT 200679_X_AT 200942_S_AT 200970_S_AT 201039_S_AT 201091_S_AT 201138_S_AT 201175_AT 201218_AT 201223_S_AT 201266_AT 201280_S_AT 201300_S_AT 201304_AT 201327_S_AT 201363_S_AT 201369_S_AT 201376_S_AT 201384_S_AT 201408_AT 201483_S_AT 201518_…
TF	Factor: E2F-1:Elk-1; motif: SGCGCSNNAMCGGAAGT	TF:M08205	false	1.06597e-10	9.97225	14824	604	522	20045	1552426_A_AT 1553678_A_AT 1553979_AT 1554021_A_AT 1554078_S_AT 1554390_S_AT 1554868_S_AT 1559078_AT 1559946_S_AT 1567214_A_AT 1568763_S_AT 1569594_A_AT 200050_AT 200679_X_AT 200942_S_AT 200970_S_AT 201039_S_AT 201091_S_AT 201138_S_AT 201175_AT 201218_AT 201223_S_AT 201266_AT 201300_S_AT 201304_AT 201327_S_AT 201363_S_AT 201369_S_AT 201376_S_AT 201384_S_AT 201408_AT 201483_S_AT 201518_AT 201568_AT…
TF	Factor: E2F-3:HES-7; motif: NNNSGCGCSNNNNNCRCGYGNN; match class: 1	TF:M08526_1	false	3.6686e-10	9.4355	15386	604	534	20045	1552426_A_AT 1553575_AT 1553678_A_AT 1553979_AT 1554021_A_AT 1554078_S_AT 1554390_S_AT 1554868_S_AT 1559078_AT 1559946_S_AT 1567214_A_AT 1568763_S_AT 1569594_A_AT 200050_AT 200679_X_AT 200942_S_AT 200970_S_AT 201039_S_AT 201091_S_AT 201138_S_AT 201175_AT 201218_AT 201223_S_AT 201266_AT 201280_S_AT 201300_S_AT 201304_AT 201327_S_AT 201363_S_AT 201369_S_AT 201376_S_AT 201384_S_AT 201408_AT 201483_S…
TF	Factor: ZF5; motif: GGSGCGCGS	TF:M10438	false	9.23032e-10	9.03478	16621	604	561	20045	1552426_A_AT 1553678_A_AT 1553979_AT 1554021_A_AT 1554078_S_AT 1554390_S_AT 1554868_S_AT 1555756_A_AT 1559078_AT 1559946_S_AT 1567214_A_AT 1568763_S_AT 1569594_A_AT 200050_AT 200679_X_AT 200942_S_AT 200970_S_AT 201039_S_AT 201091_S_AT 201138_S_AT 201175_AT 201218_AT 201223_S_AT 201266_AT 201280_S_AT 201300_S_AT 201327_S_AT 201363_S_AT 201369_S_AT 201376_S_AT 201384_S_AT 201408_AT 201483_S_AT 2015…
TF	Factor: IRX-1; motif: NACRYNNNNNNNNRYGNN; match class: 1	TF:M11018_1	false	9.7061e-10	9.01296	16304	604	554	20045	1552426_A_AT 1553575_AT 1553678_A_AT 1553979_AT 1554021_A_AT 1554078_S_AT 1554390_S_AT 1554868_S_AT 1559078_AT 1559946_S_AT 1567214_A_AT 1568763_S_AT 1569594_A_AT 200050_AT 200679_X_AT 200942_S_AT 200970_S_AT 201039_S_AT 201091_S_AT 201138_S_AT 201175_AT 201218_AT 201223_S_AT 201266_AT 201280_S_AT 201300_S_AT 201327_S_AT 201363_S_AT 201369_S_AT 201376_S_AT 201384_S_AT 201408_AT 201483_S_AT 201518…
TF	Factor: ZF5; motif: GSGCGCGR	TF:M00716	false	1.074e-09	8.96899	16490	604	558	20045	1552426_A_AT 1552701_A_AT 1553678_A_AT 1553979_AT 1554021_A_AT 1554078_S_AT 1554390_S_AT 1554868_S_AT 1559078_AT 1559946_S_AT 1567214_A_AT 1568763_S_AT 1569594_A_AT 200050_AT 200679_X_AT 200942_S_AT 200970_S_AT 201039_S_AT 201091_S_AT 201138_S_AT 201175_AT 201218_AT 201223_S_AT 201266_AT 201280_S_AT 201300_S_AT 201304_AT 201327_S_AT 201363_S_AT 201369_S_AT 201376_S_AT 201384_S_AT 201408_AT 201483…
TF	Factor: meis1:Elf-1; motif: NTGCCGGAAGTN	TF:M08377	false	2.69479e-09	8.56948	11536	604	431	20045	1553575_AT 1553678_A_AT 1553979_AT 1554021_A_AT 1554078_S_AT 1554390_S_AT 1554868_S_AT 1567214_A_AT 1568763_S_AT 1569594_A_AT 200679_X_AT 200942_S_AT 200970_S_AT 201039_S_AT 201091_S_AT 201138_S_AT 201175_AT 201223_S_AT 201266_AT 201300_S_AT 201327_S_AT 201363_S_AT 201376_S_AT 201384_S_AT 201408_AT 201483_S_AT 201518_AT 201568_AT 201569_S_AT 201595_S_AT 201637_S_AT 201687_S_AT 201699_AT 201754_AT…
TF	Factor: p300; motif: ACNTCCG; match class: 1	TF:M04826_1	false	5.44302e-09	8.26416	15605	604	536	20045	1552426_A_AT 1553678_A_AT 1553979_AT 1554021_A_AT 1554078_S_AT 1554390_S_AT 1554868_S_AT 1559078_AT 1559946_S_AT 1567214_A_AT 1568763_S_AT 1569594_A_AT 200050_AT 200679_X_AT 200942_S_AT 200970_S_AT 201039_S_AT 201091_S_AT 201138_S_AT 201175_AT 201218_AT 201223_S_AT 201266_AT 201300_S_AT 201304_AT 201327_S_AT 201363_S_AT 201369_S_AT 201376_S_AT 201384_S_AT 201408_AT 201483_S_AT 201518_AT 201568_AT…
TF	Factor: E2F; motif: GGCGSG	TF:M00803	false	1.09251e-08	7.96158	13566	604	484	20045	1552426_A_AT 1553678_A_AT 1553979_AT 1554021_A_AT 1554078_S_AT 1554390_S_AT 1559946_S_AT 1567214_A_AT 1568763_S_AT 1569594_A_AT 200050_AT 200679_X_AT 200942_S_AT 200970_S_AT 201039_S_AT 201091_S_AT 201138_S_AT 201175_AT 201218_AT 201223_S_AT 201266_AT 201280_S_AT 201300_S_AT 201327_S_AT 201363_S_AT 201369_S_AT 201376_S_AT 201408_AT 201483_S_AT 201518_AT 201568_AT 201569_S_AT 201595_S_AT 201626_AT…
TF	Factor: E2F-4; motif: SNGGGCGGGAANN; match class: 1	TF:M09894_1	false	1.1947e-08	7.92274	14345	604	504	20045	1552426_A_AT 1553678_A_AT 1553979_AT 1554021_A_AT 1554078_S_AT 1554390_S_AT 1554868_S_AT 1559078_AT 1559946_S_AT 1567214_A_AT 1568763_S_AT 200050_AT 200679_X_AT 200942_S_AT 201039_S_AT 201091_S_AT 201138_S_AT 201175_AT 201218_AT 201223_S_AT 201266_AT 201280_S_AT 201300_S_AT 201304_AT 201327_S_AT 201363_S_AT 201369_S_AT 201376_S_AT 201384_S_AT 201408_AT 201483_S_AT 201518_AT 201568_AT 201569_S_AT …
TF	Factor: E2F-1; motif: NGGGCGGGARV	TF:M07206	false	1.99883e-08	7.69922	14971	604	519	20045	1552426_A_AT 1553678_A_AT 1553979_AT 1554021_A_AT 1554078_S_AT 1554390_S_AT 1554868_S_AT 1559078_AT 1559946_S_AT 1567214_A_AT 1568763_S_AT 200050_AT 200942_S_AT 200970_S_AT 201039_S_AT 201091_S_AT 201138_S_AT 201175_AT 201218_AT 201223_S_AT 201300_S_AT 201304_AT 201327_S_AT 201363_S_AT 201369_S_AT 201376_S_AT 201384_S_AT 201408_AT 201483_S_AT 201518_AT 201568_AT 201569_S_AT 201626_AT 201637_S_AT …
TF	Factor: Elk-1; motif: NNCCGGAAGTN	TF:M11435	false	2.09776e-08	7.67824	11976	604	440	20045	1552426_A_AT 1553575_AT 1553678_A_AT 1553979_AT 1554021_A_AT 1554078_S_AT 1554390_S_AT 1554868_S_AT 1559078_AT 1559946_S_AT 1567214_A_AT 1568763_S_AT 200679_X_AT 200942_S_AT 200970_S_AT 201039_S_AT 201091_S_AT 201175_AT 201223_S_AT 201266_AT 201280_S_AT 201300_S_AT 201363_S_AT 201369_S_AT 201376_S_AT 201384_S_AT 201408_AT 201483_S_AT 201518_AT 201568_AT 201569_S_AT 201595_S_AT 201637_S_AT 201699_…
TF	Factor: E2F-1:Elk-1; motif: SGCGCSNNAMCGGAAGT; match class: 1	TF:M08205_1	false	2.25118e-08	7.64759	10744	604	405	20045	1552426_A_AT 1553678_A_AT 1553979_AT 1554078_S_AT 1554390_S_AT 1554868_S_AT 1559078_AT 1559946_S_AT 1567214_A_AT 1568763_S_AT 200050_AT 200679_X_AT 200942_S_AT 201039_S_AT 201091_S_AT 201175_AT 201218_AT 201223_S_AT 201300_S_AT 201327_S_AT 201363_S_AT 201369_S_AT 201376_S_AT 201384_S_AT 201408_AT 201483_S_AT 201518_AT 201568_AT 201595_S_AT 201626_AT 201637_S_AT 201678_S_AT 201687_S_AT 201699_AT 2…
TF	Factor: E2F4; motif: YCCCGCCNCNNSSNNSNN	TF:M12599	false	5.91989e-08	7.22769	17574	604	577	20045	1552426_A_AT 1553575_AT 1553678_A_AT 1553979_AT 1554021_A_AT 1554078_S_AT 1554390_S_AT 1554868_S_AT 1555756_A_AT 1559078_AT 1559946_S_AT 1567214_A_AT 1568763_S_AT 1569594_A_AT 200050_AT 200679_X_AT 200942_S_AT 200970_S_AT 201039_S_AT 201091_S_AT 201138_S_AT 201175_AT 201218_AT 201223_S_AT 201266_AT 201280_S_AT 201300_S_AT 201304_AT 201327_S_AT 201363_S_AT 201369_S_AT 201376_S_AT 201384_S_AT 20140…
TF	Factor: E2F-3; motif: GGCGGGN	TF:M02089	false	7.12559e-08	7.14718	13559	604	481	20045	1552426_A_AT 1553678_A_AT 1553979_AT 1554021_A_AT 1554078_S_AT 1554390_S_AT 1554868_S_AT 1559078_AT 1559946_S_AT 1567214_A_AT 1568763_S_AT 200050_AT 200679_X_AT 200942_S_AT 201039_S_AT 201091_S_AT 201175_AT 201218_AT 201223_S_AT 201266_AT 201280_S_AT 201300_S_AT 201304_AT 201327_S_AT 201363_S_AT 201369_S_AT 201376_S_AT 201384_S_AT 201408_AT 201483_S_AT 201518_AT 201568_AT 201569_S_AT 201626_AT 20…
TF	Factor: E2F-4; motif: NNTTCCCGCCNN	TF:M04823	false	7.78798e-08	7.10858	13114	604	469	20045	1552426_A_AT 1553678_A_AT 1554021_A_AT 1554078_S_AT 1554868_S_AT 1559078_AT 1559946_S_AT 1567214_A_AT 1568763_S_AT 200050_AT 200942_S_AT 200970_S_AT 201039_S_AT 201091_S_AT 201138_S_AT 201175_AT 201218_AT 201300_S_AT 201304_AT 201327_S_AT 201363_S_AT 201369_S_AT 201376_S_AT 201384_S_AT 201408_AT 201483_S_AT 201518_AT 201568_AT 201569_S_AT 201626_AT 201637_S_AT 201678_S_AT 201687_S_AT 201713_S_AT …
TF	Factor: E2F-1:HES-7; motif: GGCRCGTGSYNNWNGGCGCSM; match class: 1	TF:M08525_1	false	8.39425e-08	7.07602	15663	604	534	20045	1552426_A_AT 1553678_A_AT 1553979_AT 1554021_A_AT 1554078_S_AT 1554390_S_AT 1554868_S_AT 1559078_AT 1559946_S_AT 1567214_A_AT 1568763_S_AT 1569594_A_AT 200050_AT 200679_X_AT 200942_S_AT 200970_S_AT 201039_S_AT 201091_S_AT 201138_S_AT 201175_AT 201218_AT 201223_S_AT 201266_AT 201280_S_AT 201300_S_AT 201327_S_AT 201363_S_AT 201369_S_AT 201376_S_AT 201384_S_AT 201408_AT 201483_S_AT 201518_AT 201568_…
TF	Factor: E2F-2; motif: GCGCGCGCGYW	TF:M11531	false	1.0809e-07	6.96621	13659	604	483	20045	1552426_A_AT 1553678_A_AT 1553979_AT 1554021_A_AT 1554078_S_AT 1554390_S_AT 1559078_AT 1559946_S_AT 1567214_A_AT 1568763_S_AT 200050_AT 200679_X_AT 200942_S_AT 200970_S_AT 201039_S_AT 201091_S_AT 201138_S_AT 201218_AT 201223_S_AT 201266_AT 201280_S_AT 201300_S_AT 201327_S_AT 201363_S_AT 201369_S_AT 201376_S_AT 201384_S_AT 201408_AT 201518_AT 201568_AT 201569_S_AT 201595_S_AT 201626_AT 201678_S_AT…
TF	Factor: E2F-3:HES-7; motif: NNNSGCGCSNNNNNCRCGYGNN	TF:M08526	false	1.37357e-07	6.86215	17226	604	569	20045	1552426_A_AT 1553575_AT 1553678_A_AT 1553979_AT 1554021_A_AT 1554078_S_AT 1554390_S_AT 1554868_S_AT 1559078_AT 1559946_S_AT 1567214_A_AT 1568763_S_AT 1569594_A_AT 200050_AT 200679_X_AT 200942_S_AT 200970_S_AT 201039_S_AT 201091_S_AT 201138_S_AT 201175_AT 201218_AT 201223_S_AT 201266_AT 201280_S_AT 201300_S_AT 201304_AT 201327_S_AT 201363_S_AT 201369_S_AT 201376_S_AT 201384_S_AT 201408_AT 201483_S…
TF	Factor: ZF5; motif: NRNGNGCGCGCWN	TF:M00333	false	2.0714e-07	6.68374	15464	604	528	20045	1552426_A_AT 1553575_AT 1553678_A_AT 1553979_AT 1554021_A_AT 1554078_S_AT 1554390_S_AT 1554868_S_AT 1559078_AT 1559946_S_AT 1567214_A_AT 1568763_S_AT 1569594_A_AT 200050_AT 200679_X_AT 200942_S_AT 200970_S_AT 201039_S_AT 201091_S_AT 201138_S_AT 201218_AT 201223_S_AT 201266_AT 201300_S_AT 201327_S_AT 201363_S_AT 201369_S_AT 201376_S_AT 201384_S_AT 201408_AT 201483_S_AT 201518_AT 201568_AT 201569_S…
TF	Factor: E2F-4; motif: NTTTCSCGCC; match class: 1	TF:M07380_1	false	2.50403e-07	6.60136	8243	604	326	20045	1552426_A_AT 1553678_A_AT 1553979_AT 1554078_S_AT 1554868_S_AT 1559946_S_AT 1568763_S_AT 200050_AT 201039_S_AT 201091_S_AT 201223_S_AT 201300_S_AT 201327_S_AT 201363_S_AT 201369_S_AT 201376_S_AT 201384_S_AT 201408_AT 201483_S_AT 201518_AT 201569_S_AT 201637_S_AT 201678_S_AT 201713_S_AT 201757_AT 201879_AT 201917_S_AT 201930_AT 201971_S_AT 202001_S_AT 202041_S_AT 202097_AT 202138_X_AT 202171_AT 20…
TF	Factor: E2F-1; motif: NNNNGGCGGGAARN; match class: 1	TF:M09892_1	false	2.52572e-07	6.59761	9460	604	363	20045	1552426_A_AT 1553678_A_AT 1554021_A_AT 1554078_S_AT 1554390_S_AT 1554868_S_AT 1567214_A_AT 1568763_S_AT 200050_AT 200942_S_AT 201039_S_AT 201091_S_AT 201218_AT 201300_S_AT 201327_S_AT 201363_S_AT 201369_S_AT 201376_S_AT 201384_S_AT 201408_AT 201483_S_AT 201518_AT 201568_AT 201569_S_AT 201626_AT 201637_S_AT 201678_S_AT 201687_S_AT 201713_S_AT 201754_AT 201879_AT 201898_S_AT 201917_S_AT 201971_S_AT…
TF	Factor: CHD2; motif: TCTCGCGAG; match class: 1	TF:M04710_1	false	3.61362e-07	6.44206	11754	604	429	20045	1552426_A_AT 1553678_A_AT 1553979_AT 1554021_A_AT 1554078_S_AT 1554390_S_AT 1554868_S_AT 1559078_AT 1559946_S_AT 1567214_A_AT 1568763_S_AT 200679_X_AT 200942_S_AT 201039_S_AT 201091_S_AT 201138_S_AT 201175_AT 201218_AT 201223_S_AT 201266_AT 201280_S_AT 201300_S_AT 201304_AT 201327_S_AT 201363_S_AT 201369_S_AT 201376_S_AT 201384_S_AT 201408_AT 201483_S_AT 201568_AT 201569_S_AT 201626_AT 201678_S_A…
TF	Factor: E2F-4; motif: NTTTCSCGCC	TF:M07380	false	4.58336e-07	6.33882	13369	604	473	20045	1552426_A_AT 1553575_AT 1553678_A_AT 1553979_AT 1554021_A_AT 1554078_S_AT 1554868_S_AT 1559078_AT 1559946_S_AT 1567214_A_AT 1568763_S_AT 1569594_A_AT 200050_AT 200679_X_AT 200942_S_AT 200970_S_AT 201039_S_AT 201091_S_AT 201218_AT 201223_S_AT 201266_AT 201300_S_AT 201327_S_AT 201363_S_AT 201369_S_AT 201376_S_AT 201384_S_AT 201408_AT 201483_S_AT 201518_AT 201569_S_AT 201595_S_AT 201626_AT 201637_S_…
TF	Factor: E2F-4; motif: SNGGGCGGGAANN	TF:M09894	false	4.65463e-07	6.33211	16606	604	554	20045	1552426_A_AT 1553678_A_AT 1553979_AT 1554021_A_AT 1554078_S_AT 1554390_S_AT 1554868_S_AT 1559078_AT 1559946_S_AT 1567214_A_AT 1568763_S_AT 200050_AT 200679_X_AT 200942_S_AT 200970_S_AT 201039_S_AT 201091_S_AT 201138_S_AT 201175_AT 201218_AT 201223_S_AT 201266_AT 201280_S_AT 201300_S_AT 201304_AT 201327_S_AT 201363_S_AT 201369_S_AT 201376_S_AT 201384_S_AT 201408_AT 201483_S_AT 201518_AT 201568_AT …
TF	Factor: Egr-1; motif: GCGCATGCG; match class: 1	TF:M04869_1	false	5.39005e-07	6.26841	10557	604	394	20045	1552426_A_AT 1553678_A_AT 1554021_A_AT 1554078_S_AT 1554390_S_AT 1559078_AT 1567214_A_AT 1568763_S_AT 1569594_A_AT 200050_AT 200679_X_AT 200942_S_AT 200970_S_AT 201039_S_AT 201091_S_AT 201138_S_AT 201175_AT 201218_AT 201223_S_AT 201280_S_AT 201300_S_AT 201304_AT 201327_S_AT 201363_S_AT 201369_S_AT 201376_S_AT 201408_AT 201483_S_AT 201518_AT 201568_AT 201569_S_AT 201595_S_AT 201626_AT 201678_S_AT …
TF	Factor: pax-6; motif: NYACGCNYSANYGMNCN; match class: 1	TF:M11882_1	false	5.6151e-07	6.25064	11746	604	428	20045	1552426_A_AT 1552701_A_AT 1553575_AT 1553678_A_AT 1553979_AT 1554021_A_AT 1554078_S_AT 1554390_S_AT 1559078_AT 1567214_A_AT 1568763_S_AT 1569594_A_AT 200050_AT 200679_X_AT 200970_S_AT 201039_S_AT 201091_S_AT 201138_S_AT 201218_AT 201223_S_AT 201266_AT 201280_S_AT 201327_S_AT 201363_S_AT 201369_S_AT 201384_S_AT 201408_AT 201518_AT 201568_AT 201569_S_AT 201595_S_AT 201626_AT 201637_S_AT 201678_S_AT…
TF	Factor: ETF; motif: GVGGMGG	TF:M00695	false	6.93533e-07	6.15893	10745	604	399	20045	1553678_A_AT 1554021_A_AT 1554078_S_AT 1554390_S_AT 1554868_S_AT 1559078_AT 1567214_A_AT 1568763_S_AT 200970_S_AT 201039_S_AT 201091_S_AT 201138_S_AT 201175_AT 201218_AT 201223_S_AT 201266_AT 201280_S_AT 201300_S_AT 201327_S_AT 201363_S_AT 201369_S_AT 201376_S_AT 201408_AT 201483_S_AT 201518_AT 201568_AT 201626_AT 201637_S_AT 201678_S_AT 201687_S_AT 201713_S_AT 201754_AT 201757_AT 201879_AT 20189…
TF	Factor: GABP-alpha; motif: CTTCCK	TF:M01660	false	1.27756e-06	5.89362	11340	604	415	20045	1552426_A_AT 1553575_AT 1553678_A_AT 1553979_AT 1554021_A_AT 1554078_S_AT 1554390_S_AT 1554868_S_AT 1559078_AT 1567214_A_AT 1568763_S_AT 1569594_A_AT 200679_X_AT 200942_S_AT 200970_S_AT 201039_S_AT 201091_S_AT 201175_AT 201223_S_AT 201266_AT 201280_S_AT 201300_S_AT 201363_S_AT 201369_S_AT 201376_S_AT 201408_AT 201483_S_AT 201518_AT 201568_AT 201595_S_AT 201637_S_AT 201699_AT 201754_AT 201757_AT 2…
TF	Factor: TCF-1; motif: ACATCGRGRCGCTGW	TF:M11601	false	1.66705e-06	5.77805	15178	604	518	20045	1552426_A_AT 1553678_A_AT 1553979_AT 1554021_A_AT 1554078_S_AT 1554390_S_AT 1554868_S_AT 1559078_AT 1559946_S_AT 1567214_A_AT 1568763_S_AT 1569594_A_AT 200050_AT 200679_X_AT 200942_S_AT 200970_S_AT 201039_S_AT 201091_S_AT 201138_S_AT 201175_AT 201218_AT 201223_S_AT 201266_AT 201280_S_AT 201300_S_AT 201304_AT 201327_S_AT 201363_S_AT 201369_S_AT 201376_S_AT 201408_AT 201483_S_AT 201518_AT 201568_AT…
TF	Factor: E2F-1; motif: NNNNGGCGGGAARN	TF:M09892	false	2.20512e-06	5.65657	13916	604	485	20045	1552426_A_AT 1553678_A_AT 1554021_A_AT 1554078_S_AT 1554390_S_AT 1554868_S_AT 1559078_AT 1559946_S_AT 1567214_A_AT 1568763_S_AT 200050_AT 200679_X_AT 200942_S_AT 200970_S_AT 201039_S_AT 201091_S_AT 201138_S_AT 201175_AT 201218_AT 201300_S_AT 201304_AT 201327_S_AT 201363_S_AT 201369_S_AT 201376_S_AT 201384_S_AT 201408_AT 201483_S_AT 201518_AT 201568_AT 201569_S_AT 201626_AT 201637_S_AT 201678_S_AT…
TF	Factor: Egr-1; motif: GCGCATGCG	TF:M04869	false	2.92352e-06	5.53409	11569	604	420	20045	1552426_A_AT 1553678_A_AT 1554021_A_AT 1554078_S_AT 1554390_S_AT 1559078_AT 1567214_A_AT 1568763_S_AT 1569594_A_AT 200050_AT 200679_X_AT 200942_S_AT 200970_S_AT 201039_S_AT 201091_S_AT 201138_S_AT 201175_AT 201218_AT 201223_S_AT 201280_S_AT 201300_S_AT 201304_AT 201327_S_AT 201363_S_AT 201369_S_AT 201376_S_AT 201408_AT 201483_S_AT 201518_AT 201568_AT 201569_S_AT 201595_S_AT 201626_AT 201678_S_AT …
TF	Factor: IRX-1; motif: NACRYNNNNNNNNRYGNN	TF:M11018	false	3.01581e-06	5.5206	17328	604	568	20045	1552426_A_AT 1553575_AT 1553678_A_AT 1553979_AT 1554021_A_AT 1554078_S_AT 1554390_S_AT 1554868_S_AT 1559078_AT 1559946_S_AT 1567214_A_AT 1568763_S_AT 1569594_A_AT 200050_AT 200679_X_AT 200942_S_AT 200970_S_AT 201039_S_AT 201091_S_AT 201138_S_AT 201175_AT 201218_AT 201223_S_AT 201266_AT 201280_S_AT 201300_S_AT 201304_AT 201327_S_AT 201363_S_AT 201369_S_AT 201376_S_AT 201384_S_AT 201408_AT 201483_S…
TF	Factor: E2F-2; motif: NWTTTGGCGCCAWWNN	TF:M11530	false	3.25607e-06	5.48731	14980	604	512	20045	1552426_A_AT 1553575_AT 1553678_A_AT 1553979_AT 1554021_A_AT 1554078_S_AT 1554868_S_AT 1559078_AT 1559946_S_AT 1567214_A_AT 1568763_S_AT 1569594_A_AT 200050_AT 200679_X_AT 200942_S_AT 200970_S_AT 201039_S_AT 201091_S_AT 201138_S_AT 201175_AT 201218_AT 201223_S_AT 201266_AT 201280_S_AT 201300_S_AT 201304_AT 201327_S_AT 201363_S_AT 201369_S_AT 201376_S_AT 201384_S_AT 201408_AT 201518_AT 201568_AT 2…
TF	Factor: TCF-1; motif: ACATCGRGRCGCTGW; match class: 1	TF:M11601_1	false	3.4286e-06	5.46488	11404	604	415	20045	1552426_A_AT 1553678_A_AT 1554078_S_AT 1554390_S_AT 1554868_S_AT 1559078_AT 1559946_S_AT 1567214_A_AT 1568763_S_AT 200050_AT 200679_X_AT 200942_S_AT 200970_S_AT 201091_S_AT 201138_S_AT 201175_AT 201218_AT 201223_S_AT 201266_AT 201300_S_AT 201304_AT 201327_S_AT 201363_S_AT 201369_S_AT 201376_S_AT 201408_AT 201483_S_AT 201518_AT 201568_AT 201569_S_AT 201595_S_AT 201626_AT 201637_S_AT 201713_S_AT 20…
TF	Factor: CHD2; motif: TCTCGCGAG	TF:M04710	false	3.52221e-06	5.45319	14402	604	497	20045	1552426_A_AT 1553678_A_AT 1553979_AT 1554021_A_AT 1554078_S_AT 1554390_S_AT 1554868_S_AT 1559078_AT 1559946_S_AT 1567214_A_AT 1568763_S_AT 1569594_A_AT 200679_X_AT 200942_S_AT 200970_S_AT 201039_S_AT 201091_S_AT 201138_S_AT 201175_AT 201218_AT 201223_S_AT 201266_AT 201280_S_AT 201300_S_AT 201304_AT 201327_S_AT 201363_S_AT 201369_S_AT 201376_S_AT 201384_S_AT 201408_AT 201483_S_AT 201518_AT 201568_…
TF	Factor: E2F-1:DP-1; motif: TTTCSCGC	TF:M00736	false	4.08682e-06	5.38861	10653	604	393	20045	1553678_A_AT 1553979_AT 1554021_A_AT 1554078_S_AT 1554868_S_AT 1559946_S_AT 1567214_A_AT 1568763_S_AT 1569594_A_AT 200050_AT 200679_X_AT 200970_S_AT 201039_S_AT 201091_S_AT 201223_S_AT 201300_S_AT 201304_AT 201327_S_AT 201363_S_AT 201369_S_AT 201376_S_AT 201384_S_AT 201408_AT 201483_S_AT 201518_AT 201595_S_AT 201678_S_AT 201687_S_AT 201713_S_AT 201754_AT 201757_AT 201879_AT 201898_S_AT 201917_S_A…
TF	Factor: TCF-1; motif: ACATCGRGRCGCTGW; match class: 1	TF:M11603_1	false	4.20242e-06	5.3765	13544	604	474	20045	1552426_A_AT 1553678_A_AT 1553979_AT 1554078_S_AT 1554390_S_AT 1554868_S_AT 1559078_AT 1559946_S_AT 1567214_A_AT 1568763_S_AT 1569594_A_AT 200050_AT 200679_X_AT 200942_S_AT 200970_S_AT 201039_S_AT 201091_S_AT 201138_S_AT 201175_AT 201218_AT 201223_S_AT 201266_AT 201300_S_AT 201304_AT 201327_S_AT 201363_S_AT 201369_S_AT 201376_S_AT 201408_AT 201483_S_AT 201518_AT 201568_AT 201569_S_AT 201595_S_AT …
TF	Factor: E2F-3:TBR2; motif: ANGTGYKANGGCGCSTTNNCRNNT; match class: 1	TF:M08207_1	false	4.90984e-06	5.30893	15846	604	533	20045	1552426_A_AT 1552701_A_AT 1553678_A_AT 1553979_AT 1554021_A_AT 1554078_S_AT 1559078_AT 1559946_S_AT 1567214_A_AT 1568763_S_AT 1569594_A_AT 200050_AT 200679_X_AT 200942_S_AT 200970_S_AT 201039_S_AT 201091_S_AT 201138_S_AT 201175_AT 201218_AT 201223_S_AT 201266_AT 201280_S_AT 201300_S_AT 201304_AT 201327_S_AT 201363_S_AT 201369_S_AT 201376_S_AT 201408_AT 201483_S_AT 201518_AT 201568_AT 201569_S_AT …
TF	Factor: E2F-1; motif: NGGGCGGGARV; match class: 1	TF:M07206_1	false	4.95171e-06	5.30524	11184	604	408	20045	1552426_A_AT 1553678_A_AT 1554021_A_AT 1554868_S_AT 1559946_S_AT 1567214_A_AT 1568763_S_AT 200050_AT 200942_S_AT 200970_S_AT 201039_S_AT 201091_S_AT 201218_AT 201223_S_AT 201300_S_AT 201327_S_AT 201363_S_AT 201369_S_AT 201376_S_AT 201384_S_AT 201408_AT 201483_S_AT 201518_AT 201568_AT 201626_AT 201637_S_AT 201678_S_AT 201687_S_AT 201754_AT 201879_AT 201898_S_AT 201917_S_AT 201930_AT 201971_S_AT 20…
TF	Factor: Elk-1; motif: NRSCGGAAGNN	TF:M11434	false	8.48738e-06	5.07123	8430	604	325	20045	1552426_A_AT 1553575_AT 1553678_A_AT 1553979_AT 1554021_A_AT 1554078_S_AT 1554390_S_AT 1554868_S_AT 1559078_AT 1567214_A_AT 1568763_S_AT 200679_X_AT 200942_S_AT 200970_S_AT 201039_S_AT 201091_S_AT 201175_AT 201223_S_AT 201266_AT 201363_S_AT 201369_S_AT 201376_S_AT 201483_S_AT 201518_AT 201568_AT 201595_S_AT 201699_AT 201754_AT 201757_AT 201879_AT 201898_S_AT 201930_AT 202041_S_AT 202060_AT 202138…
TF	Factor: ZF5; motif: NRNGNGCGCGCWN; match class: 1	TF:M00333_1	false	8.79691e-06	5.05567	12784	604	452	20045	1552426_A_AT 1553678_A_AT 1554021_A_AT 1554078_S_AT 1554390_S_AT 1559078_AT 1559946_S_AT 1567214_A_AT 1569594_A_AT 200050_AT 200679_X_AT 200942_S_AT 200970_S_AT 201039_S_AT 201091_S_AT 201218_AT 201223_S_AT 201266_AT 201300_S_AT 201327_S_AT 201363_S_AT 201369_S_AT 201376_S_AT 201408_AT 201483_S_AT 201518_AT 201568_AT 201569_S_AT 201595_S_AT 201626_AT 201678_S_AT 201687_S_AT 201713_S_AT 201754_AT …
TF	Factor: ER81; motif: RCCGGAARYN	TF:M02065	false	8.88694e-06	5.05125	13076	604	460	20045	1552426_A_AT 1553575_AT 1553678_A_AT 1553979_AT 1554021_A_AT 1554078_S_AT 1554390_S_AT 1554868_S_AT 1559078_AT 1559946_S_AT 1567214_A_AT 1568763_S_AT 1569594_A_AT 200679_X_AT 200942_S_AT 200970_S_AT 201039_S_AT 201091_S_AT 201138_S_AT 201175_AT 201218_AT 201266_AT 201280_S_AT 201300_S_AT 201304_AT 201327_S_AT 201363_S_AT 201369_S_AT 201376_S_AT 201384_S_AT 201408_AT 201483_S_AT 201518_AT 201568_A…
TF	Factor: GABP-alpha; motif: CTTCCK; match class: 1	TF:M01660_1	false	9.13527e-06	5.03928	5249	604	223	20045	1552426_A_AT 1553678_A_AT 1554078_S_AT 1554390_S_AT 1554868_S_AT 1567214_A_AT 1568763_S_AT 200679_X_AT 200942_S_AT 200970_S_AT 201039_S_AT 201091_S_AT 201175_AT 201363_S_AT 201376_S_AT 201483_S_AT 201518_AT 201699_AT 201757_AT 201930_AT 202041_S_AT 202060_AT 202171_AT 202233_S_AT 202279_AT 202292_X_AT 202298_AT 202325_S_AT 202428_X_AT 202460_S_AT 202574_S_AT 202673_AT 202719_S_AT 202770_S_AT 2028…
TF	Factor: E2F-4:DP-1; motif: TTTSGCGC	TF:M00738	false	1.01059e-05	4.99542	10100	604	375	20045	1553575_AT 1553678_A_AT 1553979_AT 1554021_A_AT 1554390_S_AT 1559946_S_AT 1567214_A_AT 1568763_S_AT 1569594_A_AT 200050_AT 200679_X_AT 200970_S_AT 201039_S_AT 201091_S_AT 201218_AT 201223_S_AT 201304_AT 201327_S_AT 201363_S_AT 201369_S_AT 201376_S_AT 201408_AT 201483_S_AT 201518_AT 201568_AT 201569_S_AT 201595_S_AT 201678_S_AT 201687_S_AT 201713_S_AT 201754_AT 201898_S_AT 201917_S_AT 201930_AT 20…
TF	Factor: E2F-2; motif: GCGCGCGCNCS; match class: 1	TF:M11529_1	false	1.0391e-05	4.98334	14894	604	508	20045	1552426_A_AT 1553678_A_AT 1553979_AT 1554021_A_AT 1554078_S_AT 1554390_S_AT 1559078_AT 1559946_S_AT 1567214_A_AT 1568763_S_AT 200050_AT 200679_X_AT 200942_S_AT 200970_S_AT 201039_S_AT 201091_S_AT 201138_S_AT 201175_AT 201218_AT 201223_S_AT 201266_AT 201280_S_AT 201300_S_AT 201327_S_AT 201363_S_AT 201369_S_AT 201376_S_AT 201384_S_AT 201408_AT 201483_S_AT 201518_AT 201568_AT 201569_S_AT 201595_S_AT…
TF	Factor: E2F-4; motif: GCGGGAAANA	TF:M02090	false	1.56682e-05	4.80498	12283	604	437	20045	1552426_A_AT 1553575_AT 1553678_A_AT 1554390_S_AT 1554868_S_AT 1559078_AT 1559946_S_AT 1567214_A_AT 1568763_S_AT 200050_AT 200679_X_AT 200942_S_AT 201039_S_AT 201091_S_AT 201138_S_AT 201218_AT 201223_S_AT 201280_S_AT 201300_S_AT 201304_AT 201327_S_AT 201363_S_AT 201369_S_AT 201376_S_AT 201384_S_AT 201408_AT 201483_S_AT 201518_AT 201569_S_AT 201595_S_AT 201626_AT 201637_S_AT 201678_S_AT 201687_S_A…
TF	Factor: E2F1; motif: GSGCGGGAAN	TF:M12597	false	2.35336e-05	4.62831	14407	604	494	20045	1552426_A_AT 1553678_A_AT 1553979_AT 1554021_A_AT 1554078_S_AT 1554390_S_AT 1554868_S_AT 1559946_S_AT 1567214_A_AT 1568763_S_AT 200050_AT 200679_X_AT 200942_S_AT 201039_S_AT 201091_S_AT 201138_S_AT 201175_AT 201218_AT 201300_S_AT 201304_AT 201327_S_AT 201363_S_AT 201369_S_AT 201376_S_AT 201384_S_AT 201408_AT 201483_S_AT 201518_AT 201568_AT 201569_S_AT 201626_AT 201637_S_AT 201678_S_AT 201687_S_AT…
TF	Factor: E2F-1; motif: NNNSSCGCSAANN	TF:M07250	false	2.42949e-05	4.61448	11049	604	401	20045	1552426_A_AT 1553575_AT 1554021_A_AT 1554390_S_AT 1554868_S_AT 1559078_AT 1559946_S_AT 1567214_A_AT 1568763_S_AT 1569594_A_AT 200050_AT 200679_X_AT 200942_S_AT 200970_S_AT 201039_S_AT 201091_S_AT 201218_AT 201223_S_AT 201300_S_AT 201304_AT 201327_S_AT 201363_S_AT 201369_S_AT 201376_S_AT 201408_AT 201483_S_AT 201518_AT 201568_AT 201569_S_AT 201626_AT 201637_S_AT 201713_S_AT 201898_S_AT 201917_S_AT…
TF	Factor: Elk-1; motif: NNCCGGAAGTN; match class: 1	TF:M11435_1	false	2.45463e-05	4.61001	5881	604	242	20045	1552426_A_AT 1553678_A_AT 1554078_S_AT 1554390_S_AT 1554868_S_AT 1559946_S_AT 1567214_A_AT 1568763_S_AT 200679_X_AT 200942_S_AT 200970_S_AT 201039_S_AT 201091_S_AT 201175_AT 201300_S_AT 201363_S_AT 201376_S_AT 201483_S_AT 201568_AT 201699_AT 201757_AT 201930_AT 202041_S_AT 202060_AT 202279_AT 202292_X_AT 202298_AT 202325_S_AT 202428_X_AT 202460_S_AT 202574_S_AT 202673_AT 202719_S_AT 202770_S_AT 2…
TF	Factor: E2F; motif: GGCGSG; match class: 1	TF:M00803_1	false	2.47419e-05	4.60657	10535	604	386	20045	1552426_A_AT 1553678_A_AT 1553979_AT 1554021_A_AT 1554078_S_AT 1567214_A_AT 1568763_S_AT 200050_AT 200679_X_AT 200942_S_AT 200970_S_AT 201039_S_AT 201091_S_AT 201138_S_AT 201175_AT 201218_AT 201223_S_AT 201266_AT 201300_S_AT 201327_S_AT 201363_S_AT 201369_S_AT 201376_S_AT 201408_AT 201518_AT 201569_S_AT 201626_AT 201713_S_AT 201757_AT 201879_AT 201898_S_AT 201917_S_AT 201930_AT 201971_S_AT 202001…
TF	Factor: TAFII250; motif: RARRWGGCGGMGGNGR	TF:M10086	false	2.95791e-05	4.52902	9269	604	348	20045	1552426_A_AT 1553575_AT 1553678_A_AT 1554021_A_AT 1554078_S_AT 1554868_S_AT 1559946_S_AT 1567214_A_AT 1568763_S_AT 200050_AT 200679_X_AT 200942_S_AT 200970_S_AT 201039_S_AT 201091_S_AT 201138_S_AT 201175_AT 201223_S_AT 201266_AT 201300_S_AT 201363_S_AT 201369_S_AT 201408_AT 201595_S_AT 201626_AT 201637_S_AT 201687_S_AT 201699_AT 201757_AT 201879_AT 201930_AT 201971_S_AT 202001_S_AT 202041_S_AT 20…
TF	Factor: E2F1; motif: GSGCGGGAAN; match class: 1	TF:M12597_1	false	3.25028e-05	4.48808	10180	604	375	20045	1552426_A_AT 1553678_A_AT 1554021_A_AT 1554868_S_AT 1559946_S_AT 1567214_A_AT 1568763_S_AT 200942_S_AT 201039_S_AT 201091_S_AT 201175_AT 201218_AT 201300_S_AT 201327_S_AT 201363_S_AT 201369_S_AT 201376_S_AT 201384_S_AT 201408_AT 201483_S_AT 201518_AT 201568_AT 201569_S_AT 201626_AT 201637_S_AT 201678_S_AT 201687_S_AT 201713_S_AT 201879_AT 201898_S_AT 201917_S_AT 201971_S_AT 202001_S_AT 202041_S_A…
TF	Factor: E2F-2; motif: GCGCGCGCGYW; match class: 1	TF:M11531_1	false	4.14469e-05	4.38251	12708	604	447	20045	1552426_A_AT 1553678_A_AT 1553979_AT 1554021_A_AT 1554078_S_AT 1559078_AT 1567214_A_AT 200050_AT 200679_X_AT 200942_S_AT 200970_S_AT 201039_S_AT 201091_S_AT 201138_S_AT 201218_AT 201223_S_AT 201266_AT 201300_S_AT 201327_S_AT 201363_S_AT 201369_S_AT 201376_S_AT 201384_S_AT 201408_AT 201518_AT 201569_S_AT 201595_S_AT 201626_AT 201678_S_AT 201687_S_AT 201713_S_AT 201754_AT 201879_AT 201898_S_AT 2019…
TF	Factor: Rb:E2F-1:DP-1; motif: TTTSGCGC	TF:M00740	false	5.29194e-05	4.27638	10725	604	390	20045	1552426_A_AT 1553575_AT 1553678_A_AT 1553979_AT 1554021_A_AT 1554390_S_AT 1559946_S_AT 1567214_A_AT 1568763_S_AT 1569594_A_AT 200050_AT 200679_X_AT 200970_S_AT 201039_S_AT 201091_S_AT 201218_AT 201223_S_AT 201304_AT 201327_S_AT 201363_S_AT 201369_S_AT 201376_S_AT 201408_AT 201483_S_AT 201518_AT 201568_AT 201569_S_AT 201637_S_AT 201678_S_AT 201687_S_AT 201713_S_AT 201754_AT 201898_S_AT 201917_S_AT…
TF	Factor: Elf-1; motif: NANGCGGAAGTN	TF:M11448	false	5.30221e-05	4.27554	7777	604	301	20045	1552426_A_AT 1553575_AT 1553678_A_AT 1553979_AT 1554021_A_AT 1554078_S_AT 1554390_S_AT 1554868_S_AT 1559946_S_AT 1568763_S_AT 200679_X_AT 200942_S_AT 200970_S_AT 201039_S_AT 201091_S_AT 201175_AT 201280_S_AT 201300_S_AT 201363_S_AT 201369_S_AT 201376_S_AT 201483_S_AT 201518_AT 201568_AT 201699_AT 201754_AT 201757_AT 201898_S_AT 201930_AT 202041_S_AT 202060_AT 202163_S_AT 202171_AT 202233_S_AT 202…
TF	Factor: ER81; motif: RCCGGAARYN; match class: 1	TF:M02065_1	false	6.30925e-05	4.20002	7184	604	282	20045	1552426_A_AT 1553678_A_AT 1553979_AT 1554078_S_AT 1554390_S_AT 1554868_S_AT 1559946_S_AT 1567214_A_AT 1568763_S_AT 200679_X_AT 200942_S_AT 200970_S_AT 201039_S_AT 201091_S_AT 201138_S_AT 201175_AT 201266_AT 201300_S_AT 201327_S_AT 201363_S_AT 201376_S_AT 201384_S_AT 201483_S_AT 201568_AT 201595_S_AT 201699_AT 201757_AT 201879_AT 201917_S_AT 201930_AT 202041_S_AT 202060_AT 202110_AT 202138_X_AT 20…
TF	Factor: nerf; motif: NRRNSCGGAAGNRNNNN	TF:M09606	false	6.56928e-05	4.18248	6435	604	258	20045	1552426_A_AT 1553575_AT 1553979_AT 1554078_S_AT 1554390_S_AT 1554868_S_AT 1559078_AT 1567214_A_AT 1568763_S_AT 200679_X_AT 200970_S_AT 201039_S_AT 201091_S_AT 201223_S_AT 201266_AT 201300_S_AT 201363_S_AT 201376_S_AT 201483_S_AT 201518_AT 201595_S_AT 201699_AT 201754_AT 201757_AT 201898_S_AT 201930_AT 202041_S_AT 202060_AT 202171_AT 202233_S_AT 202279_AT 202292_X_AT 202298_AT 202325_S_AT 202428_X…
TF	Factor: LHX4; motif: NNCRTTAN	TF:M11005	false	6.85996e-05	4.16368	10812	604	392	20045	1552426_A_AT 1552701_A_AT 1553575_AT 1554021_A_AT 1554078_S_AT 1554390_S_AT 1554868_S_AT 1555756_A_AT 1567214_A_AT 1569594_A_AT 200050_AT 200679_X_AT 200970_S_AT 201039_S_AT 201091_S_AT 201175_AT 201218_AT 201266_AT 201280_S_AT 201300_S_AT 201304_AT 201327_S_AT 201369_S_AT 201376_S_AT 201408_AT 201483_S_AT 201518_AT 201568_AT 201595_S_AT 201637_S_AT 201687_S_AT 201699_AT 201713_S_AT 201754_AT 201…
TF	Factor: E2F-2; motif: NWTTTGGCGCCAWWNN; match class: 1	TF:M11530_1	false	7.38248e-05	4.1318	13807	604	476	20045	1552426_A_AT 1553575_AT 1553678_A_AT 1553979_AT 1554021_A_AT 1554078_S_AT 1554868_S_AT 1559078_AT 1559946_S_AT 1567214_A_AT 1568763_S_AT 1569594_A_AT 200050_AT 200679_X_AT 200942_S_AT 200970_S_AT 201039_S_AT 201091_S_AT 201175_AT 201223_S_AT 201266_AT 201280_S_AT 201300_S_AT 201304_AT 201327_S_AT 201363_S_AT 201369_S_AT 201376_S_AT 201384_S_AT 201408_AT 201518_AT 201568_AT 201569_S_AT 201595_S_AT…
TF	Factor: E2F-4; motif: NGGCGGGAARN	TF:M07084	false	7.95038e-05	4.09961	11167	604	402	20045	1552426_A_AT 1553678_A_AT 1554078_S_AT 1554868_S_AT 1567214_A_AT 1568763_S_AT 200050_AT 200942_S_AT 201039_S_AT 201091_S_AT 201175_AT 201218_AT 201300_S_AT 201304_AT 201327_S_AT 201363_S_AT 201369_S_AT 201376_S_AT 201384_S_AT 201408_AT 201483_S_AT 201518_AT 201568_AT 201569_S_AT 201626_AT 201637_S_AT 201678_S_AT 201687_S_AT 201713_S_AT 201879_AT 201898_S_AT 201917_S_AT 201971_S_AT 202001_S_AT 202…
TF	Factor: PEA3; motif: NACCGGAAGTN	TF:M11430	false	9.15354e-05	4.03841	11108	604	400	20045	1552426_A_AT 1553575_AT 1553678_A_AT 1553979_AT 1554021_A_AT 1554078_S_AT 1554390_S_AT 1554868_S_AT 1559078_AT 1559946_S_AT 1567214_A_AT 1568763_S_AT 200679_X_AT 200942_S_AT 200970_S_AT 201039_S_AT 201091_S_AT 201175_AT 201266_AT 201300_S_AT 201363_S_AT 201376_S_AT 201384_S_AT 201408_AT 201483_S_AT 201568_AT 201569_S_AT 201595_S_AT 201626_AT 201699_AT 201754_AT 201757_AT 201879_AT 201898_S_AT 201…
TF	Factor: EHF; motif: CSCGGAARTN; match class: 1	TF:M02052_1	false	9.93953e-05	4.00263	4145	604	181	20045	1552426_A_AT 1553979_AT 1554078_S_AT 1554390_S_AT 1567214_A_AT 1568763_S_AT 200679_X_AT 200942_S_AT 200970_S_AT 201039_S_AT 201091_S_AT 201363_S_AT 201376_S_AT 201483_S_AT 201568_AT 201757_AT 202041_S_AT 202060_AT 202171_AT 202233_S_AT 202279_AT 202292_X_AT 202298_AT 202325_S_AT 202428_X_AT 202673_AT 202704_AT 202719_S_AT 202770_S_AT 202824_S_AT 202918_S_AT 203316_S_AT 203371_S_AT 203519_S_AT 203…
TF	Factor: E2F-4; motif: NNTTCCCGCCNN; match class: 1	TF:M04823_1	false	0.000110999	3.95468	8085	604	309	20045	1552426_A_AT 1553678_A_AT 1554021_A_AT 1554868_S_AT 1567214_A_AT 1568763_S_AT 200942_S_AT 201039_S_AT 201091_S_AT 201218_AT 201327_S_AT 201363_S_AT 201369_S_AT 201376_S_AT 201384_S_AT 201408_AT 201483_S_AT 201518_AT 201568_AT 201626_AT 201637_S_AT 201678_S_AT 201754_AT 201879_AT 201917_S_AT 201971_S_AT 202001_S_AT 202041_S_AT 202097_AT 202138_X_AT 202171_AT 202209_AT 202279_AT 202292_X_AT 202325_…
TF	Factor: ELF4; motif: NCCACTTCCGGNNNN	TF:M12601	false	0.000118001	3.92812	5795	604	236	20045	1552426_A_AT 1553575_AT 1553979_AT 1554021_A_AT 1554078_S_AT 1554390_S_AT 1554868_S_AT 1559078_AT 1567214_A_AT 1568763_S_AT 200679_X_AT 200942_S_AT 200970_S_AT 201039_S_AT 201091_S_AT 201300_S_AT 201363_S_AT 201376_S_AT 201483_S_AT 201568_AT 201595_S_AT 201699_AT 201757_AT 201879_AT 201930_AT 202041_S_AT 202060_AT 202171_AT 202233_S_AT 202279_AT 202292_X_AT 202298_AT 202325_S_AT 202428_X_AT 20246…
TF	Factor: GABPA; motif: ACCGGAAGTN	TF:M03990	false	0.000126408	3.89823	5374	604	222	20045	1552426_A_AT 1553575_AT 1554021_A_AT 1554390_S_AT 1554868_S_AT 1567214_A_AT 1568763_S_AT 200679_X_AT 200942_S_AT 200970_S_AT 201039_S_AT 201175_AT 201363_S_AT 201376_S_AT 201384_S_AT 201483_S_AT 201568_AT 201569_S_AT 201595_S_AT 201699_AT 201757_AT 201879_AT 201917_S_AT 202041_S_AT 202060_AT 202138_X_AT 202171_AT 202209_AT 202233_S_AT 202292_X_AT 202298_AT 202325_S_AT 202428_X_AT 202460_S_AT 2026…
TF	Factor: BSX; motif: NNCGTTAN	TF:M10591	false	0.000171207	3.76648	7922	604	303	20045	1552426_A_AT 1554021_A_AT 1554390_S_AT 1554868_S_AT 1555756_A_AT 1567214_A_AT 1569594_A_AT 200050_AT 201039_S_AT 201091_S_AT 201175_AT 201218_AT 201266_AT 201300_S_AT 201304_AT 201369_S_AT 201376_S_AT 201408_AT 201483_S_AT 201518_AT 201568_AT 201595_S_AT 201637_S_AT 201687_S_AT 201713_S_AT 201754_AT 201971_S_AT 202001_S_AT 202060_AT 202110_AT 202146_AT 202279_AT 202298_AT 202325_S_AT 202460_S_AT …
TF	Factor: Elk-1:HOXA1; motif: ACCGGAAGTAATTA; match class: 1	TF:M08451_1	false	0.000172036	3.76438	2624	604	126	20045	1552426_A_AT 1553979_AT 1554868_S_AT 1567214_A_AT 1568763_S_AT 200679_X_AT 200942_S_AT 200970_S_AT 201039_S_AT 201175_AT 201483_S_AT 201699_AT 201757_AT 202041_S_AT 202060_AT 202292_X_AT 202298_AT 202325_S_AT 202428_X_AT 202673_AT 202824_S_AT 202918_S_AT 203316_S_AT 203534_AT 203667_AT 203831_AT 204132_S_AT 204837_AT 205178_S_AT 205644_S_AT 205668_AT 205690_S_AT 206445_S_AT 207812_S_AT 208442_S_A…
TF	Factor: E2F-3:TBR2; motif: ANGTGYKANGGCGCSTTNNCRNNT	TF:M08207	false	0.000201408	3.69592	17410	604	565	20045	1552426_A_AT 1552701_A_AT 1553678_A_AT 1553979_AT 1554021_A_AT 1554078_S_AT 1559078_AT 1559946_S_AT 1567214_A_AT 1568763_S_AT 1569594_A_AT 200050_AT 200679_X_AT 200942_S_AT 200970_S_AT 201039_S_AT 201091_S_AT 201138_S_AT 201175_AT 201218_AT 201223_S_AT 201266_AT 201280_S_AT 201300_S_AT 201304_AT 201327_S_AT 201363_S_AT 201369_S_AT 201376_S_AT 201384_S_AT 201408_AT 201483_S_AT 201518_AT 201568_AT …
TF	Factor: ETV4; motif: ACCGGAAGTN	TF:M13031	false	0.000208288	3.68134	11030	604	396	20045	1552426_A_AT 1553575_AT 1553678_A_AT 1553979_AT 1554021_A_AT 1554078_S_AT 1554390_S_AT 1554868_S_AT 1559078_AT 1559946_S_AT 1567214_A_AT 1568763_S_AT 200679_X_AT 200942_S_AT 200970_S_AT 201039_S_AT 201091_S_AT 201138_S_AT 201175_AT 201266_AT 201300_S_AT 201327_S_AT 201363_S_AT 201376_S_AT 201384_S_AT 201408_AT 201483_S_AT 201568_AT 201569_S_AT 201595_S_AT 201626_AT 201699_AT 201754_AT 201757_AT 2…
TF	Factor: BEN; motif: CAGCGRNV; match class: 1	TF:M01240_1	false	0.000214089	3.6694	13586	604	468	20045	1552426_A_AT 1553575_AT 1553678_A_AT 1553979_AT 1554078_S_AT 1554390_S_AT 1554868_S_AT 1559078_AT 1559946_S_AT 1567214_A_AT 1568763_S_AT 200050_AT 200679_X_AT 200942_S_AT 200970_S_AT 201039_S_AT 201091_S_AT 201218_AT 201223_S_AT 201266_AT 201280_S_AT 201300_S_AT 201304_AT 201327_S_AT 201376_S_AT 201408_AT 201483_S_AT 201518_AT 201568_AT 201569_S_AT 201626_AT 201637_S_AT 201678_S_AT 201713_S_AT 20…
TF	Factor: ESE-1; motif: NSMGGAARTN	TF:M01214	false	0.000220105	3.65737	7715	604	296	20045	1552426_A_AT 1553575_AT 1553678_A_AT 1553979_AT 1554021_A_AT 1554078_S_AT 1554390_S_AT 1554868_S_AT 1559946_S_AT 1567214_A_AT 1568763_S_AT 200679_X_AT 200942_S_AT 200970_S_AT 201039_S_AT 201091_S_AT 201138_S_AT 201175_AT 201280_S_AT 201300_S_AT 201363_S_AT 201376_S_AT 201384_S_AT 201483_S_AT 201568_AT 201569_S_AT 201595_S_AT 201699_AT 201757_AT 201879_AT 201898_S_AT 201917_S_AT 202041_S_AT 202060…
TF	Factor: ESE-1; motif: NSMGGAARTN	TF:M02055	false	0.000220105	3.65737	7715	604	296	20045	1552426_A_AT 1553575_AT 1553678_A_AT 1553979_AT 1554021_A_AT 1554078_S_AT 1554390_S_AT 1554868_S_AT 1559946_S_AT 1567214_A_AT 1568763_S_AT 200679_X_AT 200942_S_AT 200970_S_AT 201039_S_AT 201091_S_AT 201138_S_AT 201175_AT 201280_S_AT 201300_S_AT 201363_S_AT 201376_S_AT 201384_S_AT 201483_S_AT 201568_AT 201569_S_AT 201595_S_AT 201699_AT 201757_AT 201879_AT 201898_S_AT 201917_S_AT 202041_S_AT 202060…
TF	Factor: E2F-1:DP-2; motif: TTTSSCGC	TF:M00737	false	0.000272121	3.56524	8964	604	334	20045	1553678_A_AT 1553979_AT 1554078_S_AT 1554868_S_AT 1559078_AT 1567214_A_AT 1568763_S_AT 1569594_A_AT 200050_AT 200679_X_AT 200942_S_AT 200970_S_AT 201039_S_AT 201091_S_AT 201138_S_AT 201218_AT 201223_S_AT 201363_S_AT 201369_S_AT 201376_S_AT 201408_AT 201483_S_AT 201518_AT 201595_S_AT 201678_S_AT 201687_S_AT 201713_S_AT 201754_AT 201879_AT 201898_S_AT 201917_S_AT 201930_AT 201971_S_AT 202001_S_AT 2…
TF	Factor: c-ets-2; motif: ACCGGAWRTN; match class: 1	TF:M02064_1	false	0.000279148	3.55417	4674	604	197	20045	1552426_A_AT 1553678_A_AT 1553979_AT 1554021_A_AT 1554390_S_AT 1554868_S_AT 1559946_S_AT 1567214_A_AT 1568763_S_AT 200679_X_AT 200942_S_AT 200970_S_AT 201300_S_AT 201327_S_AT 201363_S_AT 201376_S_AT 201483_S_AT 201568_AT 201569_S_AT 201678_S_AT 201699_AT 201757_AT 201971_S_AT 202041_S_AT 202060_AT 202138_X_AT 202163_S_AT 202233_S_AT 202292_X_AT 202298_AT 202325_S_AT 202428_X_AT 202460_S_AT 202574…
TF	Factor: Nkx3-2; motif: NTCGTTAN	TF:M10625	false	0.000323856	3.48965	6168	604	246	20045	1552426_A_AT 1554021_A_AT 1554390_S_AT 1554868_S_AT 1555756_A_AT 1567214_A_AT 1569594_A_AT 200050_AT 201091_S_AT 201175_AT 201218_AT 201483_S_AT 201518_AT 201568_AT 201595_S_AT 201687_S_AT 201713_S_AT 201754_AT 201971_S_AT 202001_S_AT 202110_AT 202146_AT 202279_AT 202325_S_AT 202460_S_AT 202574_S_AT 202657_S_AT 202719_S_AT 202776_AT 202824_S_AT 202918_S_AT 203087_S_AT 203250_AT 203302_AT 203316_S…
TF	Factor: RNF96; motif: BCCCGCRGCC	TF:M01199	false	0.00032854	3.48341	8748	604	327	20045	1553678_A_AT 1554021_A_AT 1554390_S_AT 1554868_S_AT 1559078_AT 1568763_S_AT 200942_S_AT 200970_S_AT 201091_S_AT 201138_S_AT 201218_AT 201223_S_AT 201266_AT 201300_S_AT 201327_S_AT 201363_S_AT 201369_S_AT 201376_S_AT 201408_AT 201518_AT 201569_S_AT 201626_AT 201637_S_AT 201687_S_AT 201699_AT 201754_AT 201879_AT 201971_S_AT 202097_AT 202138_X_AT 202171_AT 202209_AT 202279_AT 202292_X_AT 202298_AT 2…
TF	Factor: E2F-2; motif: GCGCGCGCNCS	TF:M11529	false	0.000354577	3.45029	16674	604	547	20045	1552426_A_AT 1553575_AT 1553678_A_AT 1553979_AT 1554021_A_AT 1554078_S_AT 1554390_S_AT 1559078_AT 1559946_S_AT 1567214_A_AT 1568763_S_AT 1569594_A_AT 200050_AT 200679_X_AT 200942_S_AT 200970_S_AT 201039_S_AT 201091_S_AT 201138_S_AT 201175_AT 201218_AT 201223_S_AT 201266_AT 201280_S_AT 201300_S_AT 201304_AT 201327_S_AT 201363_S_AT 201369_S_AT 201376_S_AT 201384_S_AT 201408_AT 201483_S_AT 201518_AT…
TF	Factor: E2F-1:TBR2; motif: NGGTGNNANGGCGCNNTNNCRNNN	TF:M08523	false	0.000428745	3.3678	12482	604	436	20045	1553678_A_AT 1553979_AT 1554021_A_AT 1554078_S_AT 1559078_AT 1567214_A_AT 1568763_S_AT 1569594_A_AT 200050_AT 200679_X_AT 200970_S_AT 201039_S_AT 201091_S_AT 201138_S_AT 201218_AT 201223_S_AT 201266_AT 201300_S_AT 201304_AT 201327_S_AT 201369_S_AT 201376_S_AT 201384_S_AT 201408_AT 201483_S_AT 201518_AT 201568_AT 201595_S_AT 201626_AT 201678_S_AT 201699_AT 201713_S_AT 201757_AT 201879_AT 201898_S_…
TF	Factor: TEL1; motif: CNCGGAANNN	TF:M02070	false	0.000435122	3.36139	11085	604	396	20045	1552426_A_AT 1553678_A_AT 1553979_AT 1554021_A_AT 1554078_S_AT 1554390_S_AT 1554868_S_AT 1559078_AT 1559946_S_AT 1567214_A_AT 1568763_S_AT 1569594_A_AT 200679_X_AT 200942_S_AT 200970_S_AT 201039_S_AT 201091_S_AT 201138_S_AT 201175_AT 201218_AT 201266_AT 201280_S_AT 201300_S_AT 201327_S_AT 201363_S_AT 201376_S_AT 201384_S_AT 201408_AT 201483_S_AT 201568_AT 201569_S_AT 201595_S_AT 201626_AT 201637_…
TF	Factor: Nkx3-2; motif: NTCGTTAN; match class: 1	TF:M10625_1	false	0.000492069	3.30797	1338	604	75	20045	1554390_S_AT 1569594_A_AT 201091_S_AT 201568_AT 201595_S_AT 201754_AT 202279_AT 202657_S_AT 202719_S_AT 202776_AT 203667_AT 205644_S_AT 208066_S_AT 208808_S_AT 208863_S_AT 208924_AT 210243_S_AT 211257_X_AT 211747_S_AT 212382_AT 212918_AT 213251_AT 217750_S_AT 218283_AT 218386_X_AT 218482_AT 218671_S_AT 218852_AT 219737_S_AT 221570_S_AT 222997_S_AT 223416_AT 223451_S_AT 223455_AT 223480_S_AT 22406…
TF	Factor: E2F-1; motif: NTTTCGCGCS	TF:M00940	false	0.000506239	3.29564	8032	604	304	20045	1553678_A_AT 1553979_AT 1554021_A_AT 1567214_A_AT 1568763_S_AT 1569594_A_AT 200050_AT 200970_S_AT 201091_S_AT 201223_S_AT 201327_S_AT 201363_S_AT 201369_S_AT 201376_S_AT 201384_S_AT 201408_AT 201518_AT 201637_S_AT 201678_S_AT 201687_S_AT 201713_S_AT 201879_AT 201898_S_AT 201917_S_AT 201930_AT 202097_AT 202110_AT 202138_X_AT 202163_S_AT 202209_AT 202233_S_AT 202279_AT 202425_X_AT 202574_S_AT 20265…
TF	Factor: rax; motif: NNCRTTAN	TF:M10948	false	0.000562668	3.24975	12008	604	422	20045	1552426_A_AT 1552701_A_AT 1553575_AT 1553678_A_AT 1554021_A_AT 1554078_S_AT 1554390_S_AT 1554868_S_AT 1555756_A_AT 1567214_A_AT 1569594_A_AT 200050_AT 200679_X_AT 200970_S_AT 201039_S_AT 201091_S_AT 201138_S_AT 201175_AT 201218_AT 201266_AT 201280_S_AT 201300_S_AT 201304_AT 201327_S_AT 201369_S_AT 201376_S_AT 201408_AT 201483_S_AT 201518_AT 201568_AT 201569_S_AT 201595_S_AT 201637_S_AT 201687_S_A…
TF	Factor: PEA3; motif: NACCGGAAGTN; match class: 1	TF:M11425_1	false	0.000601945	3.22044	2383	604	115	20045	1552426_A_AT 1554390_S_AT 1567214_A_AT 1568763_S_AT 200679_X_AT 200942_S_AT 200970_S_AT 201039_S_AT 201363_S_AT 201376_S_AT 201483_S_AT 201699_AT 201757_AT 202041_S_AT 202060_AT 202097_AT 202138_X_AT 202292_X_AT 202298_AT 202325_S_AT 202428_X_AT 202673_AT 202719_S_AT 202824_S_AT 202918_S_AT 203316_S_AT 203534_AT 203781_AT 204837_AT 205644_S_AT 205668_AT 205690_S_AT 206445_S_AT 207812_S_AT 208442_…
TF	Factor: E2F-7; motif: GRGGCGGGAANNN	TF:M09896	false	0.000622183	3.20608	10463	604	377	20045	1552426_A_AT 1553678_A_AT 1554021_A_AT 1554868_S_AT 1559946_S_AT 1567214_A_AT 1568763_S_AT 200050_AT 200679_X_AT 200942_S_AT 201039_S_AT 201091_S_AT 201138_S_AT 201218_AT 201300_S_AT 201327_S_AT 201363_S_AT 201369_S_AT 201376_S_AT 201384_S_AT 201408_AT 201483_S_AT 201518_AT 201569_S_AT 201626_AT 201637_S_AT 201678_S_AT 201687_S_AT 201713_S_AT 201879_AT 201917_S_AT 201971_S_AT 202001_S_AT 202041_S…
TF	Factor: TAFII250; motif: RARRWGGCGGMGGNGR; match class: 1	TF:M10086_1	false	0.000638924	3.19455	4076	604	175	20045	1553678_A_AT 1554078_S_AT 1559946_S_AT 1568763_S_AT 201091_S_AT 201138_S_AT 201175_AT 201363_S_AT 201369_S_AT 201408_AT 201637_S_AT 201971_S_AT 202001_S_AT 202041_S_AT 202097_AT 202171_AT 202209_AT 202233_S_AT 202298_AT 202325_S_AT 202425_X_AT 202657_S_AT 202724_S_AT 203087_S_AT 203371_S_AT 203534_AT 203693_S_AT 203944_X_AT 204132_S_AT 204619_S_AT 205594_AT 205690_S_AT 206074_S_AT 206095_S_AT 206…
TF	Factor: Pax-3; motif: TCGTCACRCTTHM; match class: 1	TF:M00360_1	false	0.000663823	3.17795	5571	604	225	20045	1554021_A_AT 1554868_S_AT 1559946_S_AT 1569594_A_AT 200050_AT 200679_X_AT 201039_S_AT 201091_S_AT 201138_S_AT 201223_S_AT 201300_S_AT 201304_AT 201408_AT 201483_S_AT 201568_AT 201569_S_AT 201595_S_AT 201626_AT 201678_S_AT 201699_AT 201713_S_AT 201879_AT 201917_S_AT 201930_AT 202097_AT 202110_AT 202138_X_AT 202163_S_AT 202209_AT 202279_AT 202428_X_AT 202657_S_AT 202776_AT 202824_S_AT 203076_S_AT 2…
TF	Factor: Elf-1; motif: NAMCCGGAAGTN	TF:M11447	false	0.000772756	3.11196	7902	604	299	20045	1552426_A_AT 1553575_AT 1553979_AT 1554021_A_AT 1554078_S_AT 1554390_S_AT 1554868_S_AT 1559078_AT 1567214_A_AT 1568763_S_AT 200679_X_AT 200942_S_AT 200970_S_AT 201039_S_AT 201091_S_AT 201266_AT 201280_S_AT 201300_S_AT 201363_S_AT 201376_S_AT 201483_S_AT 201568_AT 201595_S_AT 201699_AT 201757_AT 201879_AT 201898_S_AT 201917_S_AT 202041_S_AT 202060_AT 202138_X_AT 202171_AT 202209_AT 202233_S_AT 202…
TF	Factor: ELF1; motif: NCCGGAARTN	TF:M02053	false	0.000782378	3.10658	6166	604	244	20045	1552426_A_AT 1553678_A_AT 1553979_AT 1554021_A_AT 1554390_S_AT 1554868_S_AT 1559946_S_AT 1567214_A_AT 1568763_S_AT 200679_X_AT 200970_S_AT 201039_S_AT 201091_S_AT 201175_AT 201266_AT 201300_S_AT 201363_S_AT 201376_S_AT 201384_S_AT 201483_S_AT 201568_AT 201569_S_AT 201595_S_AT 201637_S_AT 201699_AT 201757_AT 201879_AT 201917_S_AT 202041_S_AT 202060_AT 202110_AT 202171_AT 202209_AT 202233_S_AT 2022…
TF	Factor: TCF-1; motif: ACATCGRGRCGCTGW	TF:M11603	false	0.000810958	3.091	16683	604	546	20045	1552426_A_AT 1553678_A_AT 1553979_AT 1554021_A_AT 1554078_S_AT 1554390_S_AT 1554868_S_AT 1559078_AT 1559946_S_AT 1567214_A_AT 1568763_S_AT 1569594_A_AT 200050_AT 200679_X_AT 200942_S_AT 200970_S_AT 201039_S_AT 201091_S_AT 201138_S_AT 201175_AT 201218_AT 201223_S_AT 201266_AT 201280_S_AT 201300_S_AT 201304_AT 201327_S_AT 201363_S_AT 201369_S_AT 201376_S_AT 201408_AT 201483_S_AT 201518_AT 201568_AT…
TF	Factor: Elk-1:TBR2; motif: TNRCACCGGAAGN	TF:M08213	false	0.000911623	3.04018	6394	604	251	20045	1552426_A_AT 1553678_A_AT 1553979_AT 1554021_A_AT 1554390_S_AT 1554868_S_AT 1567214_A_AT 1568763_S_AT 200679_X_AT 200942_S_AT 200970_S_AT 201039_S_AT 201091_S_AT 201300_S_AT 201327_S_AT 201363_S_AT 201376_S_AT 201408_AT 201483_S_AT 201687_S_AT 201699_AT 201754_AT 201757_AT 201971_S_AT 202060_AT 202138_X_AT 202171_AT 202209_AT 202233_S_AT 202292_X_AT 202298_AT 202428_X_AT 202460_S_AT 202574_S_AT 2…
TF	Factor: ELK1; motif: NACTTCCGSCGGAAGYN	TF:M03971	false	0.000965684	3.01516	11526	604	407	20045	1553575_AT 1553678_A_AT 1554021_A_AT 1554078_S_AT 1554868_S_AT 1567214_A_AT 1568763_S_AT 200679_X_AT 200970_S_AT 201039_S_AT 201091_S_AT 201175_AT 201218_AT 201266_AT 201280_S_AT 201304_AT 201327_S_AT 201363_S_AT 201369_S_AT 201408_AT 201483_S_AT 201568_AT 201699_AT 201713_S_AT 201754_AT 201757_AT 201879_AT 201971_S_AT 202041_S_AT 202060_AT 202171_AT 202233_S_AT 202279_AT 202292_X_AT 202298_AT 20…
TF	Factor: ETF; motif: GVGGMGG; match class: 1	TF:M00695_1	false	0.000990752	3.00404	7249	604	278	20045	1553678_A_AT 1554021_A_AT 1554390_S_AT 1554868_S_AT 1559078_AT 1568763_S_AT 200970_S_AT 201039_S_AT 201091_S_AT 201138_S_AT 201218_AT 201266_AT 201300_S_AT 201327_S_AT 201363_S_AT 201369_S_AT 201376_S_AT 201408_AT 201518_AT 201626_AT 201637_S_AT 201678_S_AT 201687_S_AT 201713_S_AT 201879_AT 201930_AT 201971_S_AT 202001_S_AT 202097_AT 202171_AT 202279_AT 202425_X_AT 202428_X_AT 202460_S_AT 202574_…
TF	Factor: Elk-1; motif: RCCGGAAGTGN	TF:M09904	false	0.00107351	2.96919	8347	604	312	20045	1552426_A_AT 1553575_AT 1553678_A_AT 1553979_AT 1554021_A_AT 1554078_S_AT 1554390_S_AT 1554868_S_AT 1559078_AT 1567214_A_AT 1568763_S_AT 200679_X_AT 200942_S_AT 200970_S_AT 201039_S_AT 201091_S_AT 201138_S_AT 201175_AT 201266_AT 201363_S_AT 201376_S_AT 201483_S_AT 201568_AT 201569_S_AT 201595_S_AT 201637_S_AT 201699_AT 201757_AT 201879_AT 201917_S_AT 202041_S_AT 202060_AT 202097_AT 202138_X_AT 20…
TF	Factor: Elf-1; motif: NANGCGGAAGTN; match class: 1	TF:M11448_1	false	0.00108361	2.96513	2383	604	114	20045	1552426_A_AT 1554078_S_AT 1554390_S_AT 1568763_S_AT 200679_X_AT 200942_S_AT 200970_S_AT 201039_S_AT 201091_S_AT 201175_AT 201363_S_AT 201699_AT 202041_S_AT 202171_AT 202279_AT 202292_X_AT 202325_S_AT 202428_X_AT 202673_AT 202719_S_AT 202824_S_AT 203316_S_AT 203831_AT 204837_AT 205668_AT 205690_S_AT 208442_S_AT 208863_S_AT 209014_AT 209217_S_AT 211747_S_AT 212040_AT 212721_AT 212918_AT 213846_AT 2…
TF	Factor: Elf-1; motif: ACTTCCGGG	TF:M04714	false	0.00108882	2.96304	7992	604	301	20045	1552426_A_AT 1553575_AT 1553979_AT 1554021_A_AT 1554078_S_AT 1554390_S_AT 1554868_S_AT 1559078_AT 1559946_S_AT 1567214_A_AT 1568763_S_AT 200679_X_AT 200942_S_AT 200970_S_AT 201039_S_AT 201091_S_AT 201175_AT 201266_AT 201280_S_AT 201300_S_AT 201363_S_AT 201376_S_AT 201483_S_AT 201568_AT 201595_S_AT 201699_AT 201757_AT 201879_AT 201917_S_AT 202041_S_AT 202060_AT 202138_X_AT 202171_AT 202209_AT 2022…
TF	Factor: MAZ; motif: GGGMGGGGSSGGGGGGGGGGGG; match class: 1	TF:M09636_1	false	0.00130353	2.88488	14493	604	489	20045	1552426_A_AT 1553575_AT 1553678_A_AT 1553979_AT 1554021_A_AT 1554078_S_AT 1554390_S_AT 1554868_S_AT 1559078_AT 1559946_S_AT 1568763_S_AT 1569594_A_AT 200050_AT 200679_X_AT 200942_S_AT 200970_S_AT 201039_S_AT 201091_S_AT 201138_S_AT 201175_AT 201218_AT 201223_S_AT 201266_AT 201280_S_AT 201300_S_AT 201363_S_AT 201369_S_AT 201376_S_AT 201408_AT 201483_S_AT 201518_AT 201626_AT 201637_S_AT 201678_S_AT…
TF	Factor: Elf-1; motif: NAANCMGGAAGTGN	TF:M09605	false	0.00133628	2.8741	5925	604	235	20045	1552426_A_AT 1552701_A_AT 1553575_AT 1553678_A_AT 1554021_A_AT 1554078_S_AT 1554390_S_AT 1554868_S_AT 1559078_AT 1567214_A_AT 1568763_S_AT 200679_X_AT 200942_S_AT 200970_S_AT 201039_S_AT 201091_S_AT 201138_S_AT 201175_AT 201363_S_AT 201376_S_AT 201483_S_AT 201568_AT 201569_S_AT 201595_S_AT 201699_AT 201757_AT 201879_AT 202041_S_AT 202060_AT 202138_X_AT 202146_AT 202171_AT 202233_S_AT 202292_X_AT …
TF	Factor: Egr-1; motif: NGCGTGCGY	TF:M04950	false	0.00142723	2.8455	11211	604	397	20045	1552426_A_AT 1553575_AT 1553678_A_AT 1553979_AT 1554021_A_AT 1554078_S_AT 1554390_S_AT 1554868_S_AT 1559078_AT 1559946_S_AT 200050_AT 200942_S_AT 200970_S_AT 201039_S_AT 201091_S_AT 201138_S_AT 201218_AT 201223_S_AT 201300_S_AT 201304_AT 201327_S_AT 201363_S_AT 201369_S_AT 201376_S_AT 201408_AT 201518_AT 201568_AT 201569_S_AT 201595_S_AT 201626_AT 201678_S_AT 201687_S_AT 201879_AT 201917_S_AT 202…
TF	Factor: ER81; motif: NACCGGAAGTN	TF:M11420	false	0.00155303	2.80882	3291	604	146	20045	1552426_A_AT 1554021_A_AT 1554390_S_AT 1567214_A_AT 1568763_S_AT 200679_X_AT 200942_S_AT 200970_S_AT 201039_S_AT 201483_S_AT 201568_AT 201569_S_AT 201699_AT 201757_AT 202041_S_AT 202060_AT 202138_X_AT 202146_AT 202171_AT 202209_AT 202233_S_AT 202292_X_AT 202298_AT 202325_S_AT 202428_X_AT 202460_S_AT 202673_AT 202918_S_AT 203316_S_AT 203534_AT 204837_AT 205644_S_AT 205690_S_AT 206445_S_AT 207335_X…
TF	Factor: E2F-1:HES-7; motif: GGCRCGTGSYNNWNGGCGCSM	TF:M08525	false	0.00157637	2.80234	17481	604	564	20045	1552426_A_AT 1553678_A_AT 1553979_AT 1554021_A_AT 1554078_S_AT 1554390_S_AT 1554868_S_AT 1559078_AT 1559946_S_AT 1567214_A_AT 1568763_S_AT 1569594_A_AT 200050_AT 200679_X_AT 200942_S_AT 200970_S_AT 201039_S_AT 201091_S_AT 201138_S_AT 201175_AT 201218_AT 201223_S_AT 201266_AT 201280_S_AT 201300_S_AT 201304_AT 201327_S_AT 201363_S_AT 201369_S_AT 201376_S_AT 201384_S_AT 201408_AT 201483_S_AT 201518_…
TF	Factor: rax; motif: NNCRTTAN; match class: 1	TF:M10948_1	false	0.00159174	2.79813	5325	604	215	20045	1553575_AT 1554390_S_AT 1554868_S_AT 1567214_A_AT 1569594_A_AT 200050_AT 201091_S_AT 201175_AT 201218_AT 201280_S_AT 201300_S_AT 201304_AT 201376_S_AT 201408_AT 201518_AT 201568_AT 201595_S_AT 201637_S_AT 201754_AT 202001_S_AT 202060_AT 202110_AT 202279_AT 202298_AT 202574_S_AT 202657_S_AT 202719_S_AT 202776_AT 202824_S_AT 202918_S_AT 203302_AT 203316_S_AT 203371_S_AT 203667_AT 203831_AT 204396_S…
TF	Factor: ELK-1; motif: ACCGGAAGTN	TF:M02059	false	0.00159223	2.79799	9628	604	350	20045	1552426_A_AT 1553575_AT 1553678_A_AT 1553979_AT 1554021_A_AT 1554078_S_AT 1554390_S_AT 1554868_S_AT 1559078_AT 1559946_S_AT 1567214_A_AT 1568763_S_AT 200679_X_AT 200942_S_AT 200970_S_AT 201039_S_AT 201091_S_AT 201175_AT 201266_AT 201300_S_AT 201327_S_AT 201363_S_AT 201369_S_AT 201376_S_AT 201408_AT 201483_S_AT 201568_AT 201595_S_AT 201699_AT 201754_AT 201757_AT 201879_AT 201917_S_AT 202041_S_AT 2…
TF	Factor: GABPA; motif: ACCGGAAGTN; match class: 1	TF:M03990_1	false	0.00159722	2.79664	1230	604	69	20045	1552426_A_AT 1554390_S_AT 200679_X_AT 200942_S_AT 201376_S_AT 201483_S_AT 201568_AT 201699_AT 201757_AT 202041_S_AT 202060_AT 202292_X_AT 202325_S_AT 202673_AT 202719_S_AT 202918_S_AT 203316_S_AT 203781_AT 205644_S_AT 205690_S_AT 206445_S_AT 208946_S_AT 212721_AT 213396_S_AT 215693_X_AT 217750_S_AT 217872_AT 218249_AT 218386_X_AT 219242_AT 219598_S_AT 221570_S_AT 222103_AT 222436_S_AT 222708_S_AT…
TF	Factor: pax-6; motif: NYACGCNYSANYGMNCN	TF:M11882	false	0.00178226	2.74903	15852	604	524	20045	1552426_A_AT 1552701_A_AT 1553575_AT 1553678_A_AT 1553979_AT 1554021_A_AT 1554078_S_AT 1554390_S_AT 1554868_S_AT 1555756_A_AT 1559078_AT 1559946_S_AT 1567214_A_AT 1568763_S_AT 1569594_A_AT 200050_AT 200679_X_AT 200942_S_AT 200970_S_AT 201039_S_AT 201091_S_AT 201138_S_AT 201218_AT 201223_S_AT 201266_AT 201280_S_AT 201304_AT 201327_S_AT 201363_S_AT 201369_S_AT 201376_S_AT 201384_S_AT 201408_AT 2014…
TF	Factor: E2F; motif: TTTSGCGC	TF:M00050	false	0.00227083	2.64382	7247	604	276	20045	1553678_A_AT 1553979_AT 1567214_A_AT 1568763_S_AT 200050_AT 200679_X_AT 200970_S_AT 201039_S_AT 201091_S_AT 201218_AT 201223_S_AT 201304_AT 201327_S_AT 201369_S_AT 201376_S_AT 201408_AT 201483_S_AT 201518_AT 201568_AT 201678_S_AT 201687_S_AT 201713_S_AT 201754_AT 201898_S_AT 201917_S_AT 201930_AT 201971_S_AT 202001_S_AT 202097_AT 202110_AT 202138_X_AT 202171_AT 202209_AT 202233_S_AT 202325_S_AT 2…
TF	Factor: TEL1; motif: CNCGGAANNN; match class: 1	TF:M02070_1	false	0.00234943	2.62904	4988	604	203	20045	1552426_A_AT 1553678_A_AT 1553979_AT 1554078_S_AT 1554390_S_AT 1554868_S_AT 1559946_S_AT 1567214_A_AT 200679_X_AT 200970_S_AT 201039_S_AT 201280_S_AT 201300_S_AT 201363_S_AT 201376_S_AT 201384_S_AT 201408_AT 201483_S_AT 201568_AT 201595_S_AT 201626_AT 201757_AT 201917_S_AT 201930_AT 202041_S_AT 202060_AT 202171_AT 202209_AT 202292_X_AT 202325_S_AT 202425_X_AT 202673_AT 202770_S_AT 202776_AT 20282…
TF	Factor: E2F; motif: TTTCGCGC	TF:M00425	false	0.00248697	2.60433	11393	604	401	20045	1552426_A_AT 1553575_AT 1554021_A_AT 1554390_S_AT 1559078_AT 1559946_S_AT 1567214_A_AT 1568763_S_AT 1569594_A_AT 200050_AT 200942_S_AT 200970_S_AT 201039_S_AT 201091_S_AT 201175_AT 201218_AT 201223_S_AT 201266_AT 201304_AT 201327_S_AT 201363_S_AT 201369_S_AT 201376_S_AT 201408_AT 201483_S_AT 201518_AT 201568_AT 201569_S_AT 201626_AT 201637_S_AT 201713_S_AT 201754_AT 201917_S_AT 201930_AT 202001_S…
TF	Factor: sp4; motif: NNGNARGRGGCGGRGCNNRR	TF:M10072	false	0.0024896	2.60387	10844	604	385	20045	1552426_A_AT 1553678_A_AT 1554078_S_AT 1554390_S_AT 1559946_S_AT 1567214_A_AT 1568763_S_AT 200050_AT 200679_X_AT 200942_S_AT 201039_S_AT 201091_S_AT 201138_S_AT 201175_AT 201218_AT 201223_S_AT 201266_AT 201280_S_AT 201300_S_AT 201327_S_AT 201363_S_AT 201369_S_AT 201376_S_AT 201384_S_AT 201483_S_AT 201518_AT 201568_AT 201626_AT 201637_S_AT 201678_S_AT 201699_AT 201879_AT 201898_S_AT 201917_S_AT 20…
TF	Factor: Sp1; motif: NGGGGCGGGGN	TF:M07395	false	0.00249897	2.60224	10981	604	389	20045	1552426_A_AT 1553678_A_AT 1553979_AT 1559078_AT 1559946_S_AT 1567214_A_AT 1568763_S_AT 200050_AT 200679_X_AT 200942_S_AT 201039_S_AT 201091_S_AT 201175_AT 201218_AT 201223_S_AT 201266_AT 201280_S_AT 201300_S_AT 201304_AT 201327_S_AT 201363_S_AT 201369_S_AT 201376_S_AT 201384_S_AT 201483_S_AT 201518_AT 201626_AT 201637_S_AT 201678_S_AT 201687_S_AT 201699_AT 201879_AT 201898_S_AT 201917_S_AT 201930…
TF	Factor: Kaiso; motif: SARNYCTCGCGAGAN	TF:M09966	false	0.00260034	2.58497	2452	604	115	20045	1559078_AT 200942_S_AT 200970_S_AT 201039_S_AT 201138_S_AT 201327_S_AT 201363_S_AT 201971_S_AT 202110_AT 202138_X_AT 202209_AT 202279_AT 202574_S_AT 202673_AT 202770_S_AT 202776_AT 202897_AT 203497_AT 203667_AT 204132_S_AT 204484_AT 204838_S_AT 205178_S_AT 205594_AT 205644_S_AT 205668_AT 205690_S_AT 205849_S_AT 206074_S_AT 206095_S_AT 207812_S_AT 208691_AT 208972_S_AT 208993_S_AT 209330_S_AT 2102…
TF	Factor: E2F; motif: NNTTTCGCGCN	TF:M08875	false	0.00272182	2.56514	6410	604	249	20045	1553678_A_AT 1553979_AT 1554021_A_AT 1567214_A_AT 1568763_S_AT 1569594_A_AT 200050_AT 200970_S_AT 201091_S_AT 201223_S_AT 201327_S_AT 201363_S_AT 201369_S_AT 201408_AT 201518_AT 201678_S_AT 201713_S_AT 201898_S_AT 201917_S_AT 201930_AT 202097_AT 202110_AT 202138_X_AT 202163_S_AT 202209_AT 202233_S_AT 202298_AT 202425_X_AT 202574_S_AT 202657_S_AT 202673_AT 202724_S_AT 202776_AT 202897_AT 203250_AT…
TF	Factor: E2F; motif: TTTCGCGC; match class: 1	TF:M00425_1	false	0.00280003	2.55284	5516	604	220	20045	1553575_AT 1554390_S_AT 1559946_S_AT 1567214_A_AT 1569594_A_AT 200050_AT 200942_S_AT 200970_S_AT 201039_S_AT 201091_S_AT 201218_AT 201223_S_AT 201304_AT 201327_S_AT 201369_S_AT 201376_S_AT 201408_AT 201483_S_AT 201568_AT 201569_S_AT 201637_S_AT 201713_S_AT 201754_AT 201917_S_AT 201930_AT 202001_S_AT 202163_S_AT 202171_AT 202209_AT 202233_S_AT 202292_X_AT 202425_X_AT 202673_AT 202719_S_AT 202724_S…
TF	Factor: Erm; motif: NRCMGGAAGTN	TF:M11422	false	0.00350097	2.45581	4774	604	195	20045	1552426_A_AT 1553575_AT 1553678_A_AT 1553979_AT 1554021_A_AT 1554390_S_AT 1554868_S_AT 1567214_A_AT 1568763_S_AT 200679_X_AT 200942_S_AT 200970_S_AT 201039_S_AT 201266_AT 201376_S_AT 201483_S_AT 201568_AT 201569_S_AT 201699_AT 201757_AT 202041_S_AT 202060_AT 202097_AT 202146_AT 202171_AT 202233_S_AT 202292_X_AT 202298_AT 202325_S_AT 202428_X_AT 202460_S_AT 202574_S_AT 202673_AT 202719_S_AT 202824…
TF	Factor: Sp1; motif: GGGGCGGGGC	TF:M00931	false	0.00375322	2.4256	10605	604	377	20045	1552426_A_AT 1553678_A_AT 1553979_AT 1554390_S_AT 1554868_S_AT 1559078_AT 1559946_S_AT 1567214_A_AT 1568763_S_AT 200050_AT 200679_X_AT 200942_S_AT 201039_S_AT 201091_S_AT 201175_AT 201218_AT 201223_S_AT 201266_AT 201280_S_AT 201300_S_AT 201304_AT 201327_S_AT 201363_S_AT 201369_S_AT 201376_S_AT 201384_S_AT 201483_S_AT 201518_AT 201626_AT 201637_S_AT 201678_S_AT 201687_S_AT 201699_AT 201713_S_AT 20…
TF	Factor: EHF; motif: CSCGGAARTN	TF:M02052	false	0.00396996	2.40121	10305	604	368	20045	1552426_A_AT 1553575_AT 1553979_AT 1554021_A_AT 1554078_S_AT 1554390_S_AT 1554868_S_AT 1559946_S_AT 1567214_A_AT 1568763_S_AT 200679_X_AT 200942_S_AT 200970_S_AT 201039_S_AT 201091_S_AT 201138_S_AT 201175_AT 201280_S_AT 201300_S_AT 201363_S_AT 201376_S_AT 201384_S_AT 201483_S_AT 201568_AT 201595_S_AT 201637_S_AT 201699_AT 201754_AT 201757_AT 201879_AT 201898_S_AT 201917_S_AT 201930_AT 202041_S_AT…
TF	Factor: SP1; motif: GGCCCCGCCCCCN	TF:M12666	false	0.00404433	2.39315	8941	604	327	20045	1552426_A_AT 1553678_A_AT 1553979_AT 1554390_S_AT 1559078_AT 1559946_S_AT 1568763_S_AT 200050_AT 200679_X_AT 200942_S_AT 201039_S_AT 201091_S_AT 201223_S_AT 201266_AT 201300_S_AT 201304_AT 201363_S_AT 201369_S_AT 201376_S_AT 201384_S_AT 201518_AT 201626_AT 201678_S_AT 201699_AT 201879_AT 201898_S_AT 201930_AT 201971_S_AT 202041_S_AT 202060_AT 202138_X_AT 202209_AT 202233_S_AT 202279_AT 202298_AT …
TF	Factor: E2F; motif: TTTSGCGS; match class: 1	TF:M00426_1	false	0.00406245	2.39121	6004	604	235	20045	1553575_AT 1559946_S_AT 1567214_A_AT 1569594_A_AT 200050_AT 201039_S_AT 201091_S_AT 201218_AT 201223_S_AT 201304_AT 201327_S_AT 201369_S_AT 201376_S_AT 201408_AT 201568_AT 201569_S_AT 201637_S_AT 201713_S_AT 201754_AT 201917_S_AT 201930_AT 202041_S_AT 202097_AT 202163_S_AT 202171_AT 202209_AT 202233_S_AT 202425_X_AT 202460_S_AT 202657_S_AT 202673_AT 202719_S_AT 202724_S_AT 202897_AT 203250_AT 203…
TF	Factor: ELF2; motif: CCCGGAARYN	TF:M02054	false	0.00421032	2.37568	3119	604	138	20045	1552426_A_AT 1554021_A_AT 1554390_S_AT 1568763_S_AT 200679_X_AT 200970_S_AT 201039_S_AT 201376_S_AT 201483_S_AT 201568_AT 201595_S_AT 201699_AT 201757_AT 201879_AT 201917_S_AT 202041_S_AT 202060_AT 202171_AT 202233_S_AT 202292_X_AT 202298_AT 202325_S_AT 202428_X_AT 202673_AT 202918_S_AT 203087_S_AT 203316_S_AT 203781_AT 204837_AT 205133_S_AT 205644_S_AT 205690_S_AT 206829_X_AT 207335_X_AT 208442_…
TF	Factor: GABP-ALPHA; motif: RCCGGAARTNN	TF:M08917	false	0.00428977	2.36757	2754	604	125	20045	1552426_A_AT 1553979_AT 1554021_A_AT 1554390_S_AT 1554868_S_AT 1568763_S_AT 200679_X_AT 200970_S_AT 201039_S_AT 201483_S_AT 201568_AT 201699_AT 201757_AT 201917_S_AT 202041_S_AT 202060_AT 202171_AT 202209_AT 202233_S_AT 202292_X_AT 202298_AT 202325_S_AT 202428_X_AT 202673_AT 202776_AT 202824_S_AT 203302_AT 203316_S_AT 204837_AT 205133_S_AT 205644_S_AT 205690_S_AT 207335_X_AT 208442_S_AT 208857_S_…
TF	Factor: Elf-1; motif: NNANCCGGAAGTGS	TF:M09900	false	0.00434272	2.36224	5333	604	213	20045	1552426_A_AT 1553575_AT 1553678_A_AT 1554021_A_AT 1554078_S_AT 1554390_S_AT 1554868_S_AT 1559078_AT 1567214_A_AT 1568763_S_AT 200679_X_AT 200942_S_AT 200970_S_AT 201039_S_AT 201091_S_AT 201175_AT 201363_S_AT 201376_S_AT 201483_S_AT 201568_AT 201569_S_AT 201595_S_AT 201699_AT 201757_AT 201879_AT 202041_S_AT 202060_AT 202146_AT 202171_AT 202233_S_AT 202292_X_AT 202298_AT 202325_S_AT 202428_X_AT 202…
TF	Factor: GABPalpha; motif: RCCGGAWRYN	TF:M02074	false	0.00458265	2.33888	4702	604	192	20045	1552426_A_AT 1553575_AT 1553678_A_AT 1553979_AT 1554021_A_AT 1554390_S_AT 1568763_S_AT 200679_X_AT 200942_S_AT 200970_S_AT 201039_S_AT 201091_S_AT 201266_AT 201300_S_AT 201483_S_AT 201568_AT 201699_AT 201757_AT 201917_S_AT 202041_S_AT 202060_AT 202110_AT 202163_S_AT 202171_AT 202209_AT 202233_S_AT 202292_X_AT 202298_AT 202325_S_AT 202428_X_AT 202574_S_AT 202673_AT 202776_AT 203302_AT 203316_S_AT …
TF	Factor: Fli-1; motif: NACCGGAARTN; match class: 1	TF:M11404_1	false	0.00461258	2.33606	3238	604	142	20045	1552426_A_AT 1553979_AT 1554390_S_AT 1559946_S_AT 1567214_A_AT 1568763_S_AT 200679_X_AT 200942_S_AT 200970_S_AT 201039_S_AT 201091_S_AT 201266_AT 201300_S_AT 201363_S_AT 201376_S_AT 201483_S_AT 201568_AT 201699_AT 201757_AT 202041_S_AT 202060_AT 202209_AT 202233_S_AT 202292_X_AT 202298_AT 202325_S_AT 202428_X_AT 202574_S_AT 202673_AT 202776_AT 202918_S_AT 203316_S_AT 203371_S_AT 203534_AT 203781_…
TF	Factor: meis1:Elf-1; motif: NTGCCGGAAGTN; match class: 1	TF:M08377_1	false	0.00476288	2.32213	5157	604	207	20045	1553678_A_AT 1553979_AT 1554021_A_AT 1554078_S_AT 1554390_S_AT 1568763_S_AT 200970_S_AT 201039_S_AT 201091_S_AT 201175_AT 201266_AT 201300_S_AT 201327_S_AT 201363_S_AT 201384_S_AT 201408_AT 201483_S_AT 201568_AT 201569_S_AT 201595_S_AT 201637_S_AT 201757_AT 201898_S_AT 201930_AT 202041_S_AT 202060_AT 202110_AT 202163_S_AT 202279_AT 202292_X_AT 202298_AT 202325_S_AT 202428_X_AT 202574_S_AT 202673_…
TF	Factor: DP-1; motif: NRNNGGCGGGAANN	TF:M10098	false	0.00489619	2.31014	7274	604	275	20045	1552426_A_AT 1553678_A_AT 1554021_A_AT 1554868_S_AT 1567214_A_AT 1568763_S_AT 200942_S_AT 201039_S_AT 201091_S_AT 201138_S_AT 201363_S_AT 201369_S_AT 201376_S_AT 201384_S_AT 201408_AT 201483_S_AT 201518_AT 201637_S_AT 201678_S_AT 201687_S_AT 201713_S_AT 201879_AT 201917_S_AT 201971_S_AT 202001_S_AT 202097_AT 202171_AT 202209_AT 202279_AT 202325_S_AT 202425_X_AT 202428_X_AT 202460_S_AT 202574_S_AT…
TF	Factor: ELF1; motif: NNNASCCGGAAGTGGNNNN	TF:M12600	false	0.00496139	2.3044	8859	604	324	20045	1552426_A_AT 1553575_AT 1553979_AT 1554021_A_AT 1554078_S_AT 1554390_S_AT 1554868_S_AT 1559078_AT 1567214_A_AT 1568763_S_AT 200679_X_AT 200942_S_AT 200970_S_AT 201039_S_AT 201091_S_AT 201175_AT 201223_S_AT 201266_AT 201300_S_AT 201363_S_AT 201369_S_AT 201376_S_AT 201483_S_AT 201518_AT 201568_AT 201595_S_AT 201699_AT 201754_AT 201757_AT 201879_AT 201898_S_AT 201930_AT 202041_S_AT 202060_AT 202138_…
TF	Factor: PEA3; motif: NACCGGAAGTN	TF:M11427	false	0.00508297	2.29388	10834	604	383	20045	1552426_A_AT 1553575_AT 1553678_A_AT 1553979_AT 1554021_A_AT 1554078_S_AT 1554390_S_AT 1554868_S_AT 1559078_AT 1559946_S_AT 1567214_A_AT 1568763_S_AT 200679_X_AT 200942_S_AT 200970_S_AT 201039_S_AT 201091_S_AT 201175_AT 201266_AT 201300_S_AT 201363_S_AT 201376_S_AT 201384_S_AT 201408_AT 201483_S_AT 201568_AT 201569_S_AT 201595_S_AT 201626_AT 201699_AT 201754_AT 201757_AT 201879_AT 201917_S_AT 202…
TF	Factor: GABP-alpha; motif: NACCGGAAGTN	TF:M11414	false	0.00509548	2.29281	2988	604	133	20045	1552426_A_AT 1553575_AT 1554021_A_AT 1554390_S_AT 1567214_A_AT 1568763_S_AT 200679_X_AT 200942_S_AT 200970_S_AT 201039_S_AT 201483_S_AT 201568_AT 201699_AT 201757_AT 202041_S_AT 202060_AT 202138_X_AT 202171_AT 202209_AT 202233_S_AT 202292_X_AT 202298_AT 202325_S_AT 202428_X_AT 202460_S_AT 202673_AT 202918_S_AT 203316_S_AT 204837_AT 205644_S_AT 205690_S_AT 206445_S_AT 207335_X_AT 208442_S_AT 20899…
TF	Factor: E2F3; motif: NNRGMKGGAR; match class: 1	TF:M12598_1	false	0.00523196	2.28134	7152	604	271	20045	1552426_A_AT 1553678_A_AT 1559078_AT 1567214_A_AT 1568763_S_AT 200050_AT 201039_S_AT 201218_AT 201327_S_AT 201363_S_AT 201369_S_AT 201376_S_AT 201408_AT 201483_S_AT 201518_AT 201568_AT 201637_S_AT 201678_S_AT 201687_S_AT 201754_AT 201879_AT 201917_S_AT 201971_S_AT 202001_S_AT 202041_S_AT 202097_AT 202138_X_AT 202171_AT 202209_AT 202292_X_AT 202325_S_AT 202425_X_AT 202428_X_AT 202574_S_AT 202657_S…
TF	Factor: Foxn2; motif: NNGCGTCNNNNNGACGCNN	TF:M11541	false	0.0052647	2.27863	5992	604	234	20045	1552426_A_AT 1553678_A_AT 1554078_S_AT 1559078_AT 200679_X_AT 200970_S_AT 201218_AT 201223_S_AT 201300_S_AT 201376_S_AT 201408_AT 201518_AT 201626_AT 201678_S_AT 201713_S_AT 201754_AT 201879_AT 201917_S_AT 201930_AT 202279_AT 202292_X_AT 202325_S_AT 202425_X_AT 202460_S_AT 202574_S_AT 202657_S_AT 202719_S_AT 202724_S_AT 202798_AT 202888_S_AT 202918_S_AT 203250_AT 203302_AT 203371_S_AT 203474_AT 2…
TF	Factor: E2F-1; motif: NTTSGCGG; match class: 1	TF:M00430_1	false	0.00568682	2.24513	2574	604	118	20045	1554390_S_AT 200942_S_AT 201091_S_AT 201218_AT 201327_S_AT 201369_S_AT 201376_S_AT 201637_S_AT 201713_S_AT 201930_AT 202001_S_AT 202041_S_AT 202163_S_AT 202171_AT 202425_X_AT 202719_S_AT 203302_AT 203519_S_AT 203667_AT 203675_AT 203693_S_AT 203831_AT 205178_S_AT 205594_AT 206095_S_AT 206445_S_AT 206829_X_AT 207812_S_AT 208442_S_AT 208728_S_AT 208808_S_AT 208863_S_AT 208924_AT 209014_AT 209095_AT …
TF	Factor: NRF-1; motif: YGCGCMTGCGC	TF:M02102	false	0.00580785	2.23598	2083	604	100	20045	1554021_A_AT 1554078_S_AT 1569594_A_AT 200050_AT 200970_S_AT 201408_AT 201483_S_AT 201518_AT 201595_S_AT 201754_AT 201930_AT 202138_X_AT 203087_S_AT 203519_S_AT 203667_AT 204132_S_AT 204838_S_AT 205133_S_AT 205594_AT 205849_S_AT 206095_S_AT 206875_S_AT 207335_X_AT 208003_S_AT 208442_S_AT 208728_S_AT 208863_S_AT 210588_X_AT 212591_AT 212594_AT 213251_AT 213357_AT 214273_X_AT 215691_X_AT 215693_X_A…
TF	Factor: E2F1; motif: NNNNNGCGSSAAAN	TF:M08874	false	0.00604421	2.21866	7418	604	279	20045	1553678_A_AT 1553979_AT 1554868_S_AT 1567214_A_AT 1568763_S_AT 1569594_A_AT 200050_AT 200679_X_AT 200970_S_AT 201091_S_AT 201218_AT 201223_S_AT 201327_S_AT 201363_S_AT 201369_S_AT 201408_AT 201483_S_AT 201518_AT 201678_S_AT 201713_S_AT 201754_AT 201898_S_AT 201917_S_AT 201930_AT 201971_S_AT 202001_S_AT 202097_AT 202110_AT 202138_X_AT 202171_AT 202209_AT 202325_S_AT 202425_X_AT 202574_S_AT 202657_…
TF	Factor: Erg; motif: ACCGGAAGTN	TF:M02062	false	0.00631371	2.19972	8226	604	304	20045	1552426_A_AT 1553575_AT 1553678_A_AT 1553979_AT 1554021_A_AT 1554078_S_AT 1554390_S_AT 1554868_S_AT 1559078_AT 1567214_A_AT 1568763_S_AT 200679_X_AT 200942_S_AT 200970_S_AT 201039_S_AT 201091_S_AT 201266_AT 201300_S_AT 201327_S_AT 201363_S_AT 201376_S_AT 201483_S_AT 201568_AT 201595_S_AT 201626_AT 201699_AT 201754_AT 201757_AT 201879_AT 201917_S_AT 202041_S_AT 202060_AT 202110_AT 202138_X_AT 2021…
TF	Factor: c-ets-1; motif: ACCGGAWGTN; match class: 1	TF:M02063_1	false	0.00641327	2.19292	2442	604	113	20045	1552426_A_AT 1554390_S_AT 1567214_A_AT 1568763_S_AT 200679_X_AT 200942_S_AT 200970_S_AT 201175_AT 201376_S_AT 201483_S_AT 201568_AT 201569_S_AT 201699_AT 201757_AT 202041_S_AT 202060_AT 202292_X_AT 202325_S_AT 202428_X_AT 202673_AT 202719_S_AT 202824_S_AT 202918_S_AT 203316_S_AT 203534_AT 203781_AT 204837_AT 205644_S_AT 205668_AT 205690_S_AT 206445_S_AT 207812_S_AT 208442_S_AT 208946_S_AT 209014_…
TF	Factor: FLI-1; motif: NAYTTCCGGT; match class: 1	TF:M08913_1	false	0.00649331	2.18753	3115	604	137	20045	1552426_A_AT 1553979_AT 1554390_S_AT 1559946_S_AT 1567214_A_AT 200679_X_AT 200942_S_AT 200970_S_AT 201091_S_AT 201266_AT 201300_S_AT 201363_S_AT 201376_S_AT 201483_S_AT 201568_AT 201699_AT 201757_AT 202041_S_AT 202060_AT 202209_AT 202233_S_AT 202292_X_AT 202298_AT 202325_S_AT 202428_X_AT 202574_S_AT 202673_AT 202719_S_AT 202776_AT 202824_S_AT 202918_S_AT 203316_S_AT 203371_S_AT 203534_AT 204837_A…
TF	Factor: NRF-1; motif: GCGCMTGCGCN	TF:M07052	false	0.00686551	2.16333	2172	604	103	20045	1552426_A_AT 1554021_A_AT 1554078_S_AT 1569594_A_AT 200970_S_AT 201408_AT 201518_AT 201595_S_AT 201754_AT 201930_AT 202138_X_AT 203087_S_AT 203519_S_AT 203534_AT 203667_AT 204132_S_AT 204838_S_AT 205133_S_AT 205594_AT 205849_S_AT 206095_S_AT 206170_AT 206875_S_AT 207335_X_AT 208003_S_AT 208442_S_AT 208728_S_AT 209181_S_AT 210588_X_AT 212264_S_AT 212594_AT 213251_AT 213357_AT 214259_S_AT 214273_X_…
TF	Factor: ELF1; motif: NNNASCCGGAAGTGGNNNN; match class: 1	TF:M12600_1	false	0.00699439	2.15525	3262	604	142	20045	1552426_A_AT 1554078_S_AT 1554390_S_AT 1554868_S_AT 1567214_A_AT 1568763_S_AT 200679_X_AT 200942_S_AT 200970_S_AT 201039_S_AT 201175_AT 201363_S_AT 201376_S_AT 201483_S_AT 201699_AT 201757_AT 201930_AT 202041_S_AT 202060_AT 202292_X_AT 202298_AT 202325_S_AT 202428_X_AT 202460_S_AT 202574_S_AT 202673_AT 202719_S_AT 202824_S_AT 202918_S_AT 203316_S_AT 203534_AT 204837_AT 205644_S_AT 205668_AT 20569…
TF	Factor: nerf; motif: NNNCCGGAAGTGN	TF:M09901	false	0.00708412	2.14971	5490	604	217	20045	1552426_A_AT 1553575_AT 1553979_AT 1554021_A_AT 1554078_S_AT 1554390_S_AT 1554868_S_AT 1559078_AT 1567214_A_AT 1568763_S_AT 200679_X_AT 200942_S_AT 200970_S_AT 201039_S_AT 201091_S_AT 201363_S_AT 201483_S_AT 201568_AT 201595_S_AT 201699_AT 201757_AT 201879_AT 202041_S_AT 202060_AT 202171_AT 202233_S_AT 202292_X_AT 202298_AT 202325_S_AT 202428_X_AT 202460_S_AT 202574_S_AT 202673_AT 202719_S_AT 202…
TF	Factor: E2F-1; motif: WWTGGCGCCAAA	TF:M04515	false	0.00725936	2.1391	13705	604	464	20045	1552426_A_AT 1553575_AT 1553678_A_AT 1553979_AT 1554021_A_AT 1554390_S_AT 1554868_S_AT 1559078_AT 1559946_S_AT 1567214_A_AT 1568763_S_AT 1569594_A_AT 200050_AT 200679_X_AT 200942_S_AT 200970_S_AT 201039_S_AT 201091_S_AT 201218_AT 201223_S_AT 201300_S_AT 201327_S_AT 201363_S_AT 201369_S_AT 201376_S_AT 201384_S_AT 201408_AT 201518_AT 201568_AT 201569_S_AT 201595_S_AT 201626_AT 201637_S_AT 201678_S_…
TF	Factor: CREB ; motif: NTGACGTNA	TF:M00981	false	0.00766802	2.11532	8502	604	312	20045	1552426_A_AT 1552701_A_AT 1553678_A_AT 1553979_AT 1554021_A_AT 1554078_S_AT 1554868_S_AT 1559078_AT 1559946_S_AT 1567214_A_AT 200050_AT 200679_X_AT 200970_S_AT 201039_S_AT 201091_S_AT 201138_S_AT 201266_AT 201300_S_AT 201304_AT 201327_S_AT 201363_S_AT 201369_S_AT 201384_S_AT 201483_S_AT 201568_AT 201595_S_AT 201626_AT 201678_S_AT 201699_AT 201713_S_AT 201757_AT 201879_AT 201917_S_AT 201971_S_AT 2…
TF	Factor: ESE-1; motif: SATKGCGGATGCN; match class: 1	TF:M11381_1	false	0.00779534	2.10817	9991	604	357	20045	1552426_A_AT 1553575_AT 1553979_AT 1554021_A_AT 1554078_S_AT 1554390_S_AT 1554868_S_AT 1555756_A_AT 1559078_AT 200050_AT 200679_X_AT 200942_S_AT 200970_S_AT 201039_S_AT 201091_S_AT 201175_AT 201223_S_AT 201266_AT 201280_S_AT 201300_S_AT 201304_AT 201327_S_AT 201363_S_AT 201369_S_AT 201376_S_AT 201384_S_AT 201408_AT 201568_AT 201595_S_AT 201637_S_AT 201687_S_AT 201699_AT 201713_S_AT 201879_AT 2019…
TF	Factor: Elf-1; motif: NNANCCGGAAGTGS; match class: 1	TF:M09900_1	false	0.00803876	2.09481	1187	604	65	20045	1554390_S_AT 200679_X_AT 200942_S_AT 200970_S_AT 201039_S_AT 201483_S_AT 201699_AT 201757_AT 202041_S_AT 202292_X_AT 202298_AT 202325_S_AT 202673_AT 202719_S_AT 202918_S_AT 203316_S_AT 203534_AT 204837_AT 206445_S_AT 208728_S_AT 209217_S_AT 212040_AT 213396_S_AT 215693_X_AT 217729_S_AT 217872_AT 218249_AT 220023_AT 221570_S_AT 221983_AT 222035_S_AT 222103_AT 222104_X_AT 222826_AT 224740_AT 224957…
TF	Factor: Elk-1; motif: RCCGGAAGTGN; match class: 1	TF:M09904_1	false	0.00837052	2.07725	2818	604	126	20045	1552426_A_AT 1554390_S_AT 1567214_A_AT 1568763_S_AT 200679_X_AT 200942_S_AT 200970_S_AT 201039_S_AT 201091_S_AT 201175_AT 201363_S_AT 201376_S_AT 201483_S_AT 201568_AT 201699_AT 201757_AT 202041_S_AT 202060_AT 202292_X_AT 202298_AT 202325_S_AT 202428_X_AT 202673_AT 202719_S_AT 202824_S_AT 202918_S_AT 203316_S_AT 203534_AT 204837_AT 205133_S_AT 205644_S_AT 205668_AT 205690_S_AT 206445_S_AT 208066_…
TF	Factor: SATB1; motif: NTTTAT	TF:M03564	false	0.00866828	2.06207	16118	604	528	20045	1552426_A_AT 1552701_A_AT 1553575_AT 1553678_A_AT 1553979_AT 1554021_A_AT 1554078_S_AT 1554390_S_AT 1554868_S_AT 1555756_A_AT 1559078_AT 1559946_S_AT 1567214_A_AT 1568763_S_AT 1569594_A_AT 200050_AT 200942_S_AT 201039_S_AT 201091_S_AT 201138_S_AT 201175_AT 201218_AT 201223_S_AT 201266_AT 201280_S_AT 201300_S_AT 201304_AT 201327_S_AT 201376_S_AT 201384_S_AT 201408_AT 201483_S_AT 201518_AT 201568_A…
TF	Factor: E2F-1; motif: NTTTCGCGCS; match class: 1	TF:M00940_1	false	0.0088827	2.05146	2709	604	122	20045	1553979_AT 1568763_S_AT 200050_AT 200970_S_AT 201223_S_AT 201363_S_AT 201369_S_AT 201376_S_AT 201408_AT 201678_S_AT 201713_S_AT 201930_AT 202138_X_AT 202209_AT 202574_S_AT 202657_S_AT 202673_AT 202897_AT 203519_S_AT 203693_S_AT 203781_AT 204619_S_AT 206074_S_AT 206095_S_AT 206445_S_AT 206875_S_AT 208003_S_AT 208808_S_AT 208863_S_AT 209049_S_AT 209301_AT 209330_S_AT 210588_X_AT 210776_X_AT 212264_…
TF	Factor: E2F-1; motif: NNNSSCGCSAANN; match class: 1	TF:M07250_1	false	0.00890409	2.05041	5691	604	223	20045	1554390_S_AT 1559946_S_AT 1567214_A_AT 200050_AT 200970_S_AT 201039_S_AT 201091_S_AT 201218_AT 201223_S_AT 201327_S_AT 201363_S_AT 201369_S_AT 201376_S_AT 201569_S_AT 201637_S_AT 201713_S_AT 201898_S_AT 201930_AT 201971_S_AT 202001_S_AT 202163_S_AT 202171_AT 202209_AT 202233_S_AT 202425_X_AT 202460_S_AT 202574_S_AT 202657_S_AT 202673_AT 202719_S_AT 202724_S_AT 202897_AT 203076_S_AT 203087_S_AT 20…
TF	Factor: sp4; motif: NNNGCYCCGCCCCCY	TF:M10530	false	0.008999	2.04581	8450	604	310	20045	1552426_A_AT 1553678_A_AT 1553979_AT 1559078_AT 1559946_S_AT 1567214_A_AT 200050_AT 200679_X_AT 200942_S_AT 201039_S_AT 201091_S_AT 201175_AT 201223_S_AT 201266_AT 201280_S_AT 201300_S_AT 201363_S_AT 201376_S_AT 201384_S_AT 201483_S_AT 201518_AT 201626_AT 201637_S_AT 201678_S_AT 201699_AT 201879_AT 201898_S_AT 201930_AT 201971_S_AT 202001_S_AT 202041_S_AT 202060_AT 202138_X_AT 202163_S_AT 202209_…
TF	Factor: E2F-1:DP-1; motif: TTTCSCGC; match class: 1	TF:M00736_1	false	0.00913547	2.03927	4779	604	193	20045	1553678_A_AT 1554868_S_AT 1567214_A_AT 1568763_S_AT 200970_S_AT 201091_S_AT 201223_S_AT 201327_S_AT 201363_S_AT 201369_S_AT 201376_S_AT 201408_AT 201518_AT 201678_S_AT 201687_S_AT 201879_AT 201898_S_AT 201917_S_AT 201930_AT 201971_S_AT 202001_S_AT 202097_AT 202110_AT 202138_X_AT 202171_AT 202209_AT 202233_S_AT 202279_AT 202657_S_AT 202673_AT 202724_S_AT 202776_AT 202897_AT 203076_S_AT 203087_S_AT…
TF	Factor: c-Ets-2; motif: NCCGGAAGTG; match class: 1	TF:M08759_1	false	0.00924092	2.03429	2993	604	132	20045	1552426_A_AT 1554390_S_AT 1554868_S_AT 1567214_A_AT 1568763_S_AT 200679_X_AT 200942_S_AT 200970_S_AT 201091_S_AT 201175_AT 201363_S_AT 201376_S_AT 201483_S_AT 201568_AT 201699_AT 201757_AT 202041_S_AT 202060_AT 202292_X_AT 202298_AT 202325_S_AT 202428_X_AT 202673_AT 202719_S_AT 202824_S_AT 202918_S_AT 203316_S_AT 203534_AT 203781_AT 204837_AT 205644_S_AT 205668_AT 205690_S_AT 206445_S_AT 208442_S…
TF	Factor: ER71; motif: ACCGGAARYN	TF:M02067	false	0.0094933	2.02258	6067	604	235	20045	1552426_A_AT 1553575_AT 1553678_A_AT 1553979_AT 1554021_A_AT 1554390_S_AT 1554868_S_AT 1567214_A_AT 1568763_S_AT 200679_X_AT 200942_S_AT 200970_S_AT 201039_S_AT 201091_S_AT 201266_AT 201300_S_AT 201363_S_AT 201376_S_AT 201483_S_AT 201568_AT 201595_S_AT 201699_AT 201754_AT 201757_AT 201879_AT 201917_S_AT 202041_S_AT 202060_AT 202110_AT 202138_X_AT 202163_S_AT 202171_AT 202209_AT 202233_S_AT 202292…
TF	Factor: p300; motif: ACNTCCG	TF:M04826	false	0.00952339	2.02121	18156	604	577	20045	1552426_A_AT 1552701_A_AT 1553575_AT 1553678_A_AT 1553979_AT 1554021_A_AT 1554078_S_AT 1554390_S_AT 1554868_S_AT 1559078_AT 1559946_S_AT 1567214_A_AT 1568763_S_AT 1569594_A_AT 200050_AT 200679_X_AT 200942_S_AT 200970_S_AT 201039_S_AT 201091_S_AT 201138_S_AT 201175_AT 201218_AT 201223_S_AT 201266_AT 201280_S_AT 201300_S_AT 201304_AT 201327_S_AT 201363_S_AT 201369_S_AT 201376_S_AT 201384_S_AT 20140…
TF	Factor: ETV5; motif: ACCGGAAGTN; match class: 1	TF:M13032_1	false	0.00954359	2.02029	3627	604	154	20045	1552426_A_AT 1554390_S_AT 1554868_S_AT 1559946_S_AT 1567214_A_AT 1568763_S_AT 200679_X_AT 200942_S_AT 200970_S_AT 201039_S_AT 201300_S_AT 201363_S_AT 201376_S_AT 201483_S_AT 201568_AT 201569_S_AT 201699_AT 201757_AT 202041_S_AT 202060_AT 202138_X_AT 202292_X_AT 202298_AT 202325_S_AT 202428_X_AT 202574_S_AT 202673_AT 202719_S_AT 202776_AT 202918_S_AT 203316_S_AT 203534_AT 203781_AT 204837_AT 20513…
TF	Factor: Alx-4; motif: NNCRTTAN; match class: 1	TF:M10880_1	false	0.00973527	2.01165	2742	604	123	20045	1554390_S_AT 1554868_S_AT 1567214_A_AT 1569594_A_AT 200050_AT 201091_S_AT 201175_AT 201218_AT 201376_S_AT 201568_AT 201595_S_AT 201754_AT 202279_AT 202657_S_AT 202719_S_AT 202776_AT 202918_S_AT 203667_AT 203831_AT 204396_S_AT 204639_AT 205644_S_AT 208066_S_AT 208808_S_AT 208863_S_AT 208924_AT 209330_S_AT 209814_AT 210243_S_AT 210538_S_AT 210588_X_AT 211257_X_AT 211747_S_AT 212382_AT 212918_AT 213…
TF	Factor: Elk-1; motif: NRCCGGAAGTN	TF:M11433	false	0.0099724	2.0012	7843	604	291	20045	1552426_A_AT 1553575_AT 1553979_AT 1554021_A_AT 1554390_S_AT 1554868_S_AT 1559078_AT 1559946_S_AT 1567214_A_AT 1568763_S_AT 1569594_A_AT 200679_X_AT 200942_S_AT 200970_S_AT 201039_S_AT 201266_AT 201363_S_AT 201369_S_AT 201376_S_AT 201384_S_AT 201483_S_AT 201568_AT 201569_S_AT 201595_S_AT 201699_AT 201713_S_AT 201754_AT 201757_AT 201879_AT 202041_S_AT 202060_AT 202097_AT 202138_X_AT 202146_AT 2021…
TF	Factor: Elf-1; motif: NANGCGGAAGTR	TF:M11452	false	0.0101269	1.99452	6415	604	246	20045	1552426_A_AT 1553575_AT 1553678_A_AT 1553979_AT 1554021_A_AT 1554078_S_AT 1554390_S_AT 1554868_S_AT 1559946_S_AT 1568763_S_AT 200679_X_AT 200942_S_AT 200970_S_AT 201039_S_AT 201091_S_AT 201175_AT 201300_S_AT 201363_S_AT 201369_S_AT 201376_S_AT 201483_S_AT 201568_AT 201699_AT 201757_AT 201898_S_AT 201930_AT 202041_S_AT 202060_AT 202171_AT 202233_S_AT 202292_X_AT 202298_AT 202325_S_AT 202428_X_AT 2…
TF	Factor: Elk-1:T-bet; motif: TCACACCGGAAGNN	TF:M08231	false	0.0104399	1.9813	6763	604	257	20045	1552426_A_AT 1553678_A_AT 1553979_AT 1554021_A_AT 1554390_S_AT 1554868_S_AT 1567214_A_AT 1568763_S_AT 200679_X_AT 200942_S_AT 200970_S_AT 201039_S_AT 201300_S_AT 201327_S_AT 201363_S_AT 201376_S_AT 201408_AT 201483_S_AT 201687_S_AT 201699_AT 201754_AT 201757_AT 201971_S_AT 202060_AT 202138_X_AT 202163_S_AT 202171_AT 202209_AT 202233_S_AT 202292_X_AT 202298_AT 202428_X_AT 202460_S_AT 202574_S_AT 2…
TF	Factor: Elk-1; motif: NNNNCCGGAARTNN	TF:M00025	false	0.0110898	1.95508	10256	604	364	20045	1552426_A_AT 1553575_AT 1553678_A_AT 1553979_AT 1554021_A_AT 1554078_S_AT 1554390_S_AT 1554868_S_AT 1559078_AT 1559946_S_AT 1567214_A_AT 1568763_S_AT 200679_X_AT 200942_S_AT 200970_S_AT 201039_S_AT 201091_S_AT 201138_S_AT 201175_AT 201218_AT 201266_AT 201300_S_AT 201327_S_AT 201363_S_AT 201376_S_AT 201408_AT 201483_S_AT 201568_AT 201595_S_AT 201699_AT 201757_AT 201879_AT 201917_S_AT 201930_AT 201…
TF	Factor: PEA3; motif: RCCGGAAGYN	TF:M02066	false	0.0114683	1.9405	7214	604	271	20045	1552426_A_AT 1553575_AT 1553979_AT 1554021_A_AT 1554390_S_AT 1554868_S_AT 1559078_AT 1567214_A_AT 1568763_S_AT 200679_X_AT 200942_S_AT 200970_S_AT 201039_S_AT 201091_S_AT 201175_AT 201266_AT 201363_S_AT 201376_S_AT 201483_S_AT 201568_AT 201595_S_AT 201699_AT 201754_AT 201757_AT 201879_AT 201917_S_AT 202041_S_AT 202060_AT 202110_AT 202138_X_AT 202171_AT 202209_AT 202233_S_AT 202292_X_AT 202298_AT …
TF	Factor: SAP-1; motif: ACCGGAAGTNN	TF:M09607	false	0.011825	1.9272	4797	604	193	20045	1552426_A_AT 1553678_A_AT 1553979_AT 1554021_A_AT 1554078_S_AT 1554868_S_AT 1567214_A_AT 1568763_S_AT 200679_X_AT 200942_S_AT 200970_S_AT 201039_S_AT 201091_S_AT 201175_AT 201376_S_AT 201483_S_AT 201568_AT 201569_S_AT 201699_AT 201754_AT 201757_AT 202041_S_AT 202060_AT 202097_AT 202138_X_AT 202146_AT 202171_AT 202209_AT 202233_S_AT 202292_X_AT 202325_S_AT 202428_X_AT 202673_AT 202719_S_AT 202824_…
TF	Factor: ETS1; motif: ACCGGAARYN; match class: 1	TF:M03977_1	false	0.011825	1.9272	4797	604	193	20045	1552426_A_AT 1553678_A_AT 1553979_AT 1554021_A_AT 1554390_S_AT 1554868_S_AT 1559946_S_AT 1567214_A_AT 200679_X_AT 200942_S_AT 200970_S_AT 201039_S_AT 201091_S_AT 201266_AT 201300_S_AT 201327_S_AT 201363_S_AT 201376_S_AT 201483_S_AT 201568_AT 201595_S_AT 201699_AT 201757_AT 201917_S_AT 201930_AT 201971_S_AT 202041_S_AT 202060_AT 202138_X_AT 202209_AT 202292_X_AT 202298_AT 202325_S_AT 202428_X_AT 2…
TF	Factor: BTEB3; motif: CCNNSCCNSCCCCKCCCCC	TF:M09826	false	0.0123629	1.90788	11837	604	410	20045	1552426_A_AT 1553678_A_AT 1559078_AT 1559946_S_AT 1567214_A_AT 1568763_S_AT 1569594_A_AT 200050_AT 200679_X_AT 200942_S_AT 201039_S_AT 201091_S_AT 201175_AT 201218_AT 201223_S_AT 201266_AT 201280_S_AT 201300_S_AT 201327_S_AT 201363_S_AT 201369_S_AT 201376_S_AT 201408_AT 201483_S_AT 201518_AT 201595_S_AT 201626_AT 201637_S_AT 201678_S_AT 201699_AT 201754_AT 201879_AT 201898_S_AT 201917_S_AT 201930…
TF	Factor: Elf-1; motif: NANSCGGAAGTR	TF:M11450	false	0.0127923	1.89305	5718	604	223	20045	1552426_A_AT 1553979_AT 1554021_A_AT 1554078_S_AT 1554390_S_AT 1554868_S_AT 1567214_A_AT 1568763_S_AT 200679_X_AT 200942_S_AT 200970_S_AT 201039_S_AT 201091_S_AT 201175_AT 201218_AT 201376_S_AT 201483_S_AT 201568_AT 201699_AT 201757_AT 201898_S_AT 202041_S_AT 202060_AT 202171_AT 202233_S_AT 202292_X_AT 202325_S_AT 202428_X_AT 202673_AT 202719_S_AT 202824_S_AT 202888_S_AT 203316_S_AT 203693_S_AT 2…
TF	Factor: isx; motif: NTCRTTAA; match class: 1	TF:M10956_1	false	0.0129824	1.88664	3414	604	146	20045	1554390_S_AT 1554868_S_AT 1567214_A_AT 1569594_A_AT 200050_AT 201091_S_AT 201175_AT 201218_AT 201300_S_AT 201376_S_AT 201568_AT 201595_S_AT 201637_S_AT 201754_AT 202060_AT 202279_AT 202298_AT 202574_S_AT 202657_S_AT 202719_S_AT 202776_AT 202918_S_AT 203316_S_AT 203667_AT 203831_AT 204396_S_AT 204639_AT 205644_S_AT 205849_S_AT 206095_S_AT 208066_S_AT 208808_S_AT 208863_S_AT 208924_AT 208993_S_AT 2…
TF	Factor: ELK1; motif: ACCGGAAGTN	TF:M03970	false	0.0138892	1.85732	4899	604	196	20045	1552426_A_AT 1553575_AT 1553979_AT 1554021_A_AT 1554390_S_AT 1554868_S_AT 1567214_A_AT 1568763_S_AT 200679_X_AT 200942_S_AT 200970_S_AT 201039_S_AT 201376_S_AT 201483_S_AT 201568_AT 201569_S_AT 201595_S_AT 201699_AT 201757_AT 202041_S_AT 202060_AT 202138_X_AT 202146_AT 202171_AT 202209_AT 202233_S_AT 202292_X_AT 202298_AT 202325_S_AT 202428_X_AT 202460_S_AT 202673_AT 202824_S_AT 202918_S_AT 20308…
TF	Factor: Kaiso; motif: TCTCGCGAG	TF:M04691	false	0.0140294	1.85296	15460	604	510	20045	1552426_A_AT 1553678_A_AT 1553979_AT 1554021_A_AT 1554078_S_AT 1554868_S_AT 1555756_A_AT 1559078_AT 1559946_S_AT 1567214_A_AT 1568763_S_AT 1569594_A_AT 200050_AT 200679_X_AT 200942_S_AT 200970_S_AT 201039_S_AT 201091_S_AT 201138_S_AT 201175_AT 201223_S_AT 201266_AT 201280_S_AT 201300_S_AT 201304_AT 201327_S_AT 201363_S_AT 201369_S_AT 201376_S_AT 201384_S_AT 201408_AT 201483_S_AT 201518_AT 201568_…
TF	Factor: ELK1; motif: ACCGGAAGTN; match class: 1	TF:M03970_1	false	0.0143304	1.84374	1133	604	62	20045	1552426_A_AT 1554390_S_AT 1567214_A_AT 1568763_S_AT 200679_X_AT 200942_S_AT 200970_S_AT 201483_S_AT 201699_AT 201757_AT 202041_S_AT 202060_AT 202292_X_AT 202325_S_AT 202428_X_AT 202673_AT 202918_S_AT 203316_S_AT 203534_AT 204837_AT 205644_S_AT 205690_S_AT 206445_S_AT 207812_S_AT 208442_S_AT 208946_S_AT 212721_AT 213396_S_AT 215693_X_AT 217729_S_AT 217872_AT 218249_AT 221570_S_AT 221998_S_AT 22210…
TF	Factor: c-ets-2; motif: ACCGGAWRTN	TF:M02064	false	0.0147339	1.83168	11163	604	390	20045	1552426_A_AT 1553575_AT 1553678_A_AT 1553979_AT 1554021_A_AT 1554390_S_AT 1554868_S_AT 1555756_A_AT 1559946_S_AT 1567214_A_AT 1568763_S_AT 200679_X_AT 200942_S_AT 200970_S_AT 201039_S_AT 201175_AT 201266_AT 201300_S_AT 201327_S_AT 201363_S_AT 201376_S_AT 201384_S_AT 201408_AT 201483_S_AT 201568_AT 201569_S_AT 201595_S_AT 201626_AT 201678_S_AT 201699_AT 201754_AT 201757_AT 201879_AT 201898_S_AT 20…
TF	Factor: ER71; motif: NACCGGAARTN	TF:M11413	false	0.0150746	1.82175	2156	604	101	20045	1552426_A_AT 1554021_A_AT 1568763_S_AT 200679_X_AT 200970_S_AT 201039_S_AT 201483_S_AT 201568_AT 201699_AT 201757_AT 202041_S_AT 202060_AT 202171_AT 202209_AT 202233_S_AT 202292_X_AT 202298_AT 202325_S_AT 202428_X_AT 202673_AT 203316_S_AT 204837_AT 205690_S_AT 208442_S_AT 208993_S_AT 209014_AT 209181_S_AT 209217_S_AT 209330_S_AT 211747_S_AT 213396_S_AT 214512_S_AT 215693_X_AT 215936_S_AT 217872_A…
TF	Factor: Net; motif: NRCCGGAAGTN	TF:M11439	false	0.01525	1.81673	2321	604	107	20045	1552426_A_AT 1554021_A_AT 1554390_S_AT 1568763_S_AT 200679_X_AT 200970_S_AT 201039_S_AT 201483_S_AT 201568_AT 201699_AT 201757_AT 202041_S_AT 202060_AT 202171_AT 202233_S_AT 202292_X_AT 202298_AT 202325_S_AT 202428_X_AT 202673_AT 203316_S_AT 204837_AT 205644_S_AT 205690_S_AT 206445_S_AT 207335_X_AT 208442_S_AT 208993_S_AT 209014_AT 209181_S_AT 209217_S_AT 209330_S_AT 211747_S_AT 212603_AT 212721_…
TF	Factor: Erg; motif: NACCGGAARYN	TF:M11392	false	0.0158398	1.80025	8890	604	322	20045	1552426_A_AT 1553575_AT 1553678_A_AT 1553979_AT 1554021_A_AT 1554078_S_AT 1554390_S_AT 1554868_S_AT 1559078_AT 1567214_A_AT 1568763_S_AT 200679_X_AT 200942_S_AT 200970_S_AT 201039_S_AT 201091_S_AT 201218_AT 201266_AT 201300_S_AT 201327_S_AT 201363_S_AT 201376_S_AT 201483_S_AT 201568_AT 201595_S_AT 201699_AT 201757_AT 201879_AT 201917_S_AT 202041_S_AT 202060_AT 202110_AT 202138_X_AT 202163_S_AT 20…
TF	Factor: MAZ; motif: GGGMGGGGSSGGGGGGGGGGGG	TF:M09636	false	0.0161838	1.79092	16635	604	540	20045	1552426_A_AT 1552701_A_AT 1553575_AT 1553678_A_AT 1553979_AT 1554021_A_AT 1554078_S_AT 1554390_S_AT 1554868_S_AT 1559078_AT 1559946_S_AT 1567214_A_AT 1568763_S_AT 1569594_A_AT 200050_AT 200679_X_AT 200942_S_AT 200970_S_AT 201039_S_AT 201091_S_AT 201138_S_AT 201175_AT 201218_AT 201223_S_AT 201266_AT 201280_S_AT 201300_S_AT 201327_S_AT 201363_S_AT 201369_S_AT 201376_S_AT 201384_S_AT 201408_AT 20148…
TF	Factor: E2F-1; motif: TTTSGCGCGMNR	TF:M00516	false	0.0162526	1.78908	7115	604	267	20045	1553575_AT 1554021_A_AT 1554390_S_AT 1559946_S_AT 1567214_A_AT 1568763_S_AT 1569594_A_AT 200050_AT 201039_S_AT 201091_S_AT 201218_AT 201223_S_AT 201304_AT 201327_S_AT 201369_S_AT 201376_S_AT 201408_AT 201518_AT 201568_AT 201569_S_AT 201713_S_AT 201917_S_AT 201930_AT 202001_S_AT 202097_AT 202163_S_AT 202171_AT 202209_AT 202233_S_AT 202325_S_AT 202460_S_AT 202657_S_AT 202673_AT 202724_S_AT 202888_S…
TF	Factor: E2F-6; motif: NGGGCGGGARRNN	TF:M09895	false	0.0162913	1.78805	8045	604	296	20045	1552426_A_AT 1553678_A_AT 1554868_S_AT 1567214_A_AT 1568763_S_AT 200050_AT 200942_S_AT 201039_S_AT 201091_S_AT 201300_S_AT 201327_S_AT 201363_S_AT 201369_S_AT 201376_S_AT 201384_S_AT 201408_AT 201483_S_AT 201518_AT 201569_S_AT 201626_AT 201637_S_AT 201678_S_AT 201687_S_AT 201713_S_AT 201879_AT 201917_S_AT 201971_S_AT 202001_S_AT 202041_S_AT 202097_AT 202138_X_AT 202171_AT 202209_AT 202279_AT 2022…
TF	Factor: Tax/CREB; motif: GGGGGTTGACGYANA	TF:M00114	false	0.0165549	1.78107	6705	604	254	20045	1552426_A_AT 1553678_A_AT 1553979_AT 1554021_A_AT 1554078_S_AT 1554868_S_AT 200050_AT 200679_X_AT 200970_S_AT 201091_S_AT 201266_AT 201300_S_AT 201304_AT 201327_S_AT 201384_S_AT 201568_AT 201595_S_AT 201678_S_AT 201699_AT 201713_S_AT 201754_AT 201757_AT 201879_AT 201917_S_AT 202041_S_AT 202060_AT 202097_AT 202163_S_AT 202209_AT 202279_AT 202298_AT 202574_S_AT 202673_AT 202724_S_AT 202888_S_AT 203…
TF	Factor: Erg; motif: NACCGGATATCCGGTN	TF:M11393	false	0.0171728	1.76516	14394	604	481	20045	1552426_A_AT 1553678_A_AT 1553979_AT 1554021_A_AT 1554390_S_AT 1559078_AT 1559946_S_AT 1567214_A_AT 1568763_S_AT 1569594_A_AT 200679_X_AT 200942_S_AT 200970_S_AT 201091_S_AT 201175_AT 201218_AT 201223_S_AT 201266_AT 201280_S_AT 201300_S_AT 201327_S_AT 201369_S_AT 201376_S_AT 201384_S_AT 201408_AT 201518_AT 201568_AT 201569_S_AT 201595_S_AT 201626_AT 201637_S_AT 201678_S_AT 201699_AT 201713_S_AT 2…
TF	Factor: Elf-1; motif: AWCCCGGAAGTN	TF:M07415	false	0.0176782	1.75256	8149	604	299	20045	1552426_A_AT 1553575_AT 1554021_A_AT 1554078_S_AT 1554390_S_AT 1559078_AT 1559946_S_AT 1567214_A_AT 1568763_S_AT 200679_X_AT 200942_S_AT 200970_S_AT 201039_S_AT 201091_S_AT 201138_S_AT 201266_AT 201300_S_AT 201363_S_AT 201376_S_AT 201483_S_AT 201568_AT 201569_S_AT 201595_S_AT 201699_AT 201757_AT 201879_AT 201917_S_AT 202041_S_AT 202060_AT 202097_AT 202138_X_AT 202146_AT 202171_AT 202209_AT 202233…
TF	Factor: Elf-1; motif: NANCCGGAAGTN	TF:M11449	false	0.0179745	1.74534	4376	604	178	20045	1552426_A_AT 1553575_AT 1554021_A_AT 1554078_S_AT 1554390_S_AT 1554868_S_AT 1568763_S_AT 200679_X_AT 200970_S_AT 201039_S_AT 201138_S_AT 201483_S_AT 201568_AT 201569_S_AT 201699_AT 201754_AT 201757_AT 202041_S_AT 202060_AT 202146_AT 202171_AT 202233_S_AT 202292_X_AT 202298_AT 202325_S_AT 202428_X_AT 202574_S_AT 202673_AT 202704_AT 202719_S_AT 203316_S_AT 203741_S_AT 204837_AT 205644_S_AT 205668_A…
TF	Factor: Foxn2; motif: NNGCGTCNNNNNGACGCNN; match class: 1	TF:M11541_1	false	0.0191836	1.71707	5687	604	221	20045	1552426_A_AT 1553678_A_AT 1554078_S_AT 1559078_AT 200679_X_AT 200970_S_AT 201218_AT 201223_S_AT 201300_S_AT 201376_S_AT 201408_AT 201518_AT 201626_AT 201678_S_AT 201713_S_AT 201754_AT 201879_AT 201917_S_AT 201930_AT 202279_AT 202325_S_AT 202425_X_AT 202460_S_AT 202574_S_AT 202657_S_AT 202719_S_AT 202724_S_AT 202798_AT 202888_S_AT 202918_S_AT 203250_AT 203302_AT 203371_S_AT 203474_AT 203519_S_AT 2…
TF	Factor: NRF-1; motif: SYGCGCMTGCGCRNNGSN	TF:M09641	false	0.0193747	1.71277	3323	604	142	20045	1552426_A_AT 1554021_A_AT 1554078_S_AT 1567214_A_AT 1569594_A_AT 200050_AT 200970_S_AT 201039_S_AT 201138_S_AT 201223_S_AT 201376_S_AT 201408_AT 201483_S_AT 201518_AT 201595_S_AT 201754_AT 201917_S_AT 201930_AT 202001_S_AT 202138_X_AT 202460_S_AT 202724_S_AT 203087_S_AT 203519_S_AT 203534_AT 203667_AT 204132_S_AT 204396_S_AT 204838_S_AT 205133_S_AT 205594_AT 205849_S_AT 206095_S_AT 206170_AT 2068…
TF	Factor: ER71:SREBP-2; motif: NTSACGTGACGGAARY; match class: 1	TF:M08457_1	false	0.0194672	1.7107	5719	604	222	20045	1553575_AT 1553678_A_AT 1554078_S_AT 1554390_S_AT 1554868_S_AT 1559946_S_AT 1567214_A_AT 1568763_S_AT 1569594_A_AT 200679_X_AT 201175_AT 201223_S_AT 201266_AT 201363_S_AT 201376_S_AT 201384_S_AT 201408_AT 201518_AT 201569_S_AT 201699_AT 201879_AT 201917_S_AT 201930_AT 202060_AT 202097_AT 202163_S_AT 202209_AT 202233_S_AT 202279_AT 202298_AT 202425_X_AT 202574_S_AT 202673_AT 202770_S_AT 202897_AT …
TF	Factor: LHX4; motif: NNCRTTAN; match class: 1	TF:M11005_1	false	0.0194686	1.71067	4292	604	175	20045	1554390_S_AT 1554868_S_AT 1567214_A_AT 1569594_A_AT 200050_AT 201091_S_AT 201175_AT 201218_AT 201300_S_AT 201304_AT 201376_S_AT 201408_AT 201518_AT 201568_AT 201595_S_AT 201637_S_AT 201754_AT 202001_S_AT 202060_AT 202110_AT 202279_AT 202298_AT 202574_S_AT 202657_S_AT 202719_S_AT 202776_AT 202824_S_AT 202918_S_AT 203316_S_AT 203667_AT 203831_AT 204396_S_AT 204639_AT 205644_S_AT 205849_S_AT 206095_…
TF	Factor: ESE-1; motif: NWTRCGGAWGCN; match class: 1	TF:M11382_1	false	0.0196269	1.70715	4233	604	173	20045	1553575_AT 1553678_A_AT 1554078_S_AT 1554390_S_AT 1554868_S_AT 200679_X_AT 200942_S_AT 200970_S_AT 201039_S_AT 201091_S_AT 201363_S_AT 201568_AT 201569_S_AT 201595_S_AT 201637_S_AT 201699_AT 201898_S_AT 202041_S_AT 202163_S_AT 202171_AT 202279_AT 202292_X_AT 202298_AT 202673_AT 202824_S_AT 202918_S_AT 203076_S_AT 203250_AT 203316_S_AT 203534_AT 203831_AT 204837_AT 205668_AT 205690_S_AT 205849_S_A…
TF	Factor: Elf-1; motif: ACTTCCGGG; match class: 1	TF:M04714_1	false	0.0197612	1.70419	2725	604	121	20045	1552426_A_AT 1554078_S_AT 1554390_S_AT 1567214_A_AT 200679_X_AT 200942_S_AT 200970_S_AT 201039_S_AT 201091_S_AT 201300_S_AT 201363_S_AT 201376_S_AT 201483_S_AT 201568_AT 201699_AT 201757_AT 202041_S_AT 202060_AT 202292_X_AT 202298_AT 202325_S_AT 202428_X_AT 202673_AT 202719_S_AT 202776_AT 202824_S_AT 202918_S_AT 203316_S_AT 203534_AT 204837_AT 205644_S_AT 205668_AT 205690_S_AT 206445_S_AT 208442_…
TF	Factor: ER71:Pax-5; motif: ACCGGAACYACGCWTSANTG; match class: 1	TF:M08266_1	false	0.0198901	1.70136	9206	604	331	20045	1552426_A_AT 1553678_A_AT 1554021_A_AT 1554390_S_AT 1559946_S_AT 1567214_A_AT 200942_S_AT 200970_S_AT 201091_S_AT 201138_S_AT 201300_S_AT 201304_AT 201327_S_AT 201363_S_AT 201376_S_AT 201408_AT 201483_S_AT 201518_AT 201569_S_AT 201595_S_AT 201626_AT 201678_S_AT 201713_S_AT 201754_AT 201757_AT 201879_AT 201917_S_AT 201930_AT 202041_S_AT 202060_AT 202097_AT 202138_X_AT 202146_AT 202163_S_AT 202209_…
TF	Factor: Elk-1; motif: NRCCGGAAGTN; match class: 1	TF:M11433_1	false	0.0202054	1.69453	2308	604	106	20045	1552426_A_AT 1554390_S_AT 1554868_S_AT 1567214_A_AT 1568763_S_AT 200679_X_AT 200942_S_AT 200970_S_AT 201376_S_AT 201483_S_AT 201699_AT 201757_AT 202041_S_AT 202060_AT 202138_X_AT 202171_AT 202292_X_AT 202325_S_AT 202428_X_AT 202673_AT 202719_S_AT 202918_S_AT 203316_S_AT 203534_AT 203667_AT 203781_AT 204837_AT 205644_S_AT 205668_AT 205690_S_AT 206170_AT 206445_S_AT 207812_S_AT 208442_S_AT 208946_S…
TF	Factor: ESE-1; motif: NWTRCGGAWGCN	TF:M11382	false	0.0204111	1.69013	10545	604	371	20045	1552426_A_AT 1553575_AT 1553678_A_AT 1553979_AT 1554021_A_AT 1554078_S_AT 1554390_S_AT 1554868_S_AT 1559078_AT 1568763_S_AT 1569594_A_AT 200050_AT 200679_X_AT 200942_S_AT 200970_S_AT 201039_S_AT 201091_S_AT 201175_AT 201223_S_AT 201280_S_AT 201300_S_AT 201363_S_AT 201369_S_AT 201376_S_AT 201408_AT 201518_AT 201568_AT 201569_S_AT 201595_S_AT 201637_S_AT 201678_S_AT 201699_AT 201754_AT 201757_AT 20…
TF	Factor: E2F; motif: TTTSGCGSG	TF:M00918	false	0.0205338	1.68753	5754	604	223	20045	1553575_AT 1559078_AT 1559946_S_AT 1567214_A_AT 1568763_S_AT 200050_AT 201039_S_AT 201091_S_AT 201218_AT 201223_S_AT 201304_AT 201327_S_AT 201363_S_AT 201369_S_AT 201376_S_AT 201568_AT 201569_S_AT 201637_S_AT 201713_S_AT 201917_S_AT 201930_AT 202097_AT 202171_AT 202233_S_AT 202298_AT 202425_X_AT 202460_S_AT 202673_AT 202888_S_AT 203076_S_AT 203250_AT 203302_AT 203675_AT 203693_S_AT 203831_AT 2041…
TF	Factor: pax-6; motif: NYACGCNTSANYGCNYN	TF:M11881	false	0.0210092	1.67759	13468	604	455	20045	1552426_A_AT 1552701_A_AT 1553575_AT 1553678_A_AT 1553979_AT 1554021_A_AT 1554078_S_AT 1554390_S_AT 1554868_S_AT 1555756_A_AT 1559078_AT 1559946_S_AT 1567214_A_AT 1568763_S_AT 1569594_A_AT 200050_AT 200679_X_AT 200942_S_AT 200970_S_AT 201039_S_AT 201091_S_AT 201223_S_AT 201266_AT 201280_S_AT 201300_S_AT 201304_AT 201327_S_AT 201363_S_AT 201369_S_AT 201376_S_AT 201384_S_AT 201408_AT 201483_S_AT 20…
TF	Factor: E2F; motif: TTTSGCGS	TF:M00426	false	0.0211162	1.67538	12231	604	420	20045	1553575_AT 1553979_AT 1554021_A_AT 1554390_S_AT 1554868_S_AT 1559078_AT 1559946_S_AT 1567214_A_AT 1568763_S_AT 1569594_A_AT 200050_AT 200679_X_AT 200942_S_AT 200970_S_AT 201039_S_AT 201091_S_AT 201175_AT 201218_AT 201223_S_AT 201266_AT 201304_AT 201327_S_AT 201369_S_AT 201376_S_AT 201408_AT 201518_AT 201568_AT 201569_S_AT 201595_S_AT 201626_AT 201637_S_AT 201678_S_AT 201713_S_AT 201754_AT 201879_…
TF	Factor: E2F-1; motif: TWSGCGCGAAAAYKR	TF:M00024	false	0.0213031	1.67156	9080	604	327	20045	1552701_A_AT 1553678_A_AT 1553979_AT 1554021_A_AT 1554390_S_AT 1554868_S_AT 1559078_AT 1567214_A_AT 1568763_S_AT 1569594_A_AT 200050_AT 200679_X_AT 200942_S_AT 200970_S_AT 201091_S_AT 201138_S_AT 201218_AT 201223_S_AT 201300_S_AT 201304_AT 201363_S_AT 201376_S_AT 201384_S_AT 201408_AT 201483_S_AT 201569_S_AT 201637_S_AT 201678_S_AT 201754_AT 201879_AT 201898_S_AT 201917_S_AT 201930_AT 202001_S_AT…
TF	Factor: FLI1; motif: ACCGGAARTN	TF:M03988	false	0.0233895	1.63098	8498	604	309	20045	1552426_A_AT 1553575_AT 1553678_A_AT 1553979_AT 1554021_A_AT 1554390_S_AT 1554868_S_AT 1559078_AT 1559946_S_AT 1567214_A_AT 1568763_S_AT 200679_X_AT 200942_S_AT 200970_S_AT 201039_S_AT 201091_S_AT 201266_AT 201300_S_AT 201327_S_AT 201363_S_AT 201376_S_AT 201483_S_AT 201568_AT 201595_S_AT 201678_S_AT 201699_AT 201757_AT 201879_AT 201917_S_AT 202041_S_AT 202060_AT 202110_AT 202138_X_AT 202163_S_AT …
TF	Factor: isx; motif: NTCRTTAA	TF:M10956	false	0.0236896	1.62544	9619	604	343	20045	1552426_A_AT 1554021_A_AT 1554078_S_AT 1554390_S_AT 1554868_S_AT 1555756_A_AT 1567214_A_AT 1569594_A_AT 200050_AT 200679_X_AT 200970_S_AT 201039_S_AT 201091_S_AT 201175_AT 201218_AT 201266_AT 201280_S_AT 201300_S_AT 201304_AT 201369_S_AT 201376_S_AT 201408_AT 201483_S_AT 201568_AT 201595_S_AT 201637_S_AT 201687_S_AT 201713_S_AT 201754_AT 201879_AT 201917_S_AT 201971_S_AT 202001_S_AT 202060_AT 202…
TF	Factor: Erm; motif: NNSCGGAWGYN; match class: 1	TF:M11424_1	false	0.0244263	1.61214	2907	604	127	20045	1552426_A_AT 1554078_S_AT 1554390_S_AT 1567214_A_AT 1568763_S_AT 200679_X_AT 200942_S_AT 200970_S_AT 201039_S_AT 201363_S_AT 201376_S_AT 201483_S_AT 201568_AT 201699_AT 201757_AT 202041_S_AT 202060_AT 202279_AT 202292_X_AT 202298_AT 202325_S_AT 202574_S_AT 202673_AT 202719_S_AT 202918_S_AT 203316_S_AT 203534_AT 203781_AT 204837_AT 205644_S_AT 205668_AT 205690_S_AT 206445_S_AT 208442_S_AT 208946_S…
TF	Factor: c-Ets-2; motif: NCCGGAAGTG	TF:M08759	false	0.0244985	1.61086	8502	604	309	20045	1552426_A_AT 1553575_AT 1553678_A_AT 1553979_AT 1554021_A_AT 1554078_S_AT 1554390_S_AT 1554868_S_AT 1559078_AT 1559946_S_AT 1567214_A_AT 1568763_S_AT 200679_X_AT 200942_S_AT 200970_S_AT 201039_S_AT 201091_S_AT 201175_AT 201266_AT 201363_S_AT 201376_S_AT 201384_S_AT 201483_S_AT 201568_AT 201595_S_AT 201699_AT 201757_AT 201879_AT 201917_S_AT 202041_S_AT 202060_AT 202138_X_AT 202171_AT 202209_AT 202…
TF	Factor: Kaiso; motif: GNTCTCGCGAGRNNNNGGN	TF:M09632	false	0.0271602	1.56607	3056	604	132	20045	1553678_A_AT 1554021_A_AT 1554078_S_AT 1559078_AT 200942_S_AT 201039_S_AT 201138_S_AT 201218_AT 201363_S_AT 201376_S_AT 201678_S_AT 201971_S_AT 202110_AT 202138_X_AT 202209_AT 202279_AT 202325_S_AT 202657_S_AT 202724_S_AT 203497_AT 203667_AT 204396_S_AT 204639_AT 205133_S_AT 205178_S_AT 205594_AT 205644_S_AT 205668_AT 205690_S_AT 206074_S_AT 206095_S_AT 206875_S_AT 207812_S_AT 208972_S_AT 209330_…
TF	Factor: E2F-1; motif: NTTTTGGCGCCAWWWN	TF:M11533	false	0.0271737	1.56585	13454	604	454	20045	1552426_A_AT 1553575_AT 1553678_A_AT 1553979_AT 1554021_A_AT 1554078_S_AT 1554390_S_AT 1554868_S_AT 1559078_AT 1559946_S_AT 1567214_A_AT 1568763_S_AT 1569594_A_AT 200050_AT 200679_X_AT 200942_S_AT 200970_S_AT 201039_S_AT 201091_S_AT 201138_S_AT 201223_S_AT 201300_S_AT 201304_AT 201327_S_AT 201363_S_AT 201369_S_AT 201376_S_AT 201384_S_AT 201408_AT 201518_AT 201568_AT 201569_S_AT 201595_S_AT 201626…
TF	Factor: FLI1; motif: ACCGGAARTN; match class: 1	TF:M03988_1	false	0.0272551	1.56455	2999	604	130	20045	1552426_A_AT 1553979_AT 1554390_S_AT 1559946_S_AT 1567214_A_AT 1568763_S_AT 200679_X_AT 200942_S_AT 200970_S_AT 201091_S_AT 201266_AT 201300_S_AT 201363_S_AT 201376_S_AT 201483_S_AT 201568_AT 201699_AT 201757_AT 202041_S_AT 202060_AT 202209_AT 202233_S_AT 202292_X_AT 202298_AT 202325_S_AT 202428_X_AT 202574_S_AT 202673_AT 202776_AT 202918_S_AT 203316_S_AT 203371_S_AT 203534_AT 204837_AT 205178_S_…
TF	Factor: ERG; motif: ACCGGAART; match class: 1	TF:M01752_1	false	0.0272984	1.56386	3782	604	157	20045	1552426_A_AT 1553678_A_AT 1553979_AT 1554390_S_AT 1559946_S_AT 1567214_A_AT 1568763_S_AT 200679_X_AT 200942_S_AT 200970_S_AT 201039_S_AT 201091_S_AT 201300_S_AT 201363_S_AT 201376_S_AT 201483_S_AT 201568_AT 201699_AT 201757_AT 202041_S_AT 202060_AT 202209_AT 202233_S_AT 202292_X_AT 202298_AT 202325_S_AT 202428_X_AT 202574_S_AT 202673_AT 202719_S_AT 202776_AT 202824_S_AT 202918_S_AT 203316_S_AT 20…
TF	Factor: Sp1; motif: NGGGGGCGGGGYN	TF:M00196	false	0.0273988	1.56227	10571	604	371	20045	1552426_A_AT 1553678_A_AT 1553979_AT 1554868_S_AT 1559078_AT 1559946_S_AT 1567214_A_AT 1568763_S_AT 200050_AT 200679_X_AT 200942_S_AT 201039_S_AT 201091_S_AT 201175_AT 201218_AT 201223_S_AT 201266_AT 201280_S_AT 201300_S_AT 201304_AT 201363_S_AT 201369_S_AT 201376_S_AT 201384_S_AT 201483_S_AT 201518_AT 201626_AT 201637_S_AT 201678_S_AT 201687_S_AT 201699_AT 201879_AT 201898_S_AT 201917_S_AT 20193…
TF	Factor: ETV7; motif: NCCGGAANNN; match class: 1	TF:M02071_1	false	0.0275825	1.55937	4586	604	184	20045	1552426_A_AT 1553979_AT 1554390_S_AT 1559946_S_AT 1567214_A_AT 200679_X_AT 200942_S_AT 200970_S_AT 201039_S_AT 201091_S_AT 201266_AT 201300_S_AT 201327_S_AT 201363_S_AT 201376_S_AT 201408_AT 201483_S_AT 201568_AT 201595_S_AT 201699_AT 201757_AT 201917_S_AT 201930_AT 202041_S_AT 202060_AT 202138_X_AT 202209_AT 202292_X_AT 202298_AT 202325_S_AT 202428_X_AT 202574_S_AT 202673_AT 202776_AT 202897_AT …
TF	Factor: Kaiso; motif: TCTCGCGAG; match class: 1	TF:M04691_1	false	0.0298535	1.525	10748	604	376	20045	1552426_A_AT 1553678_A_AT 1553979_AT 1554021_A_AT 1554078_S_AT 1554868_S_AT 1559078_AT 1559946_S_AT 1567214_A_AT 1569594_A_AT 200050_AT 200942_S_AT 201039_S_AT 201091_S_AT 201175_AT 201223_S_AT 201266_AT 201280_S_AT 201300_S_AT 201304_AT 201327_S_AT 201363_S_AT 201369_S_AT 201376_S_AT 201384_S_AT 201408_AT 201483_S_AT 201568_AT 201569_S_AT 201595_S_AT 201637_S_AT 201678_S_AT 201754_AT 201757_AT 2…
TF	Factor: Sp1; motif: NNGGGGCGGGGNN	TF:M00932	false	0.0305296	1.51528	10750	604	376	20045	1552426_A_AT 1553678_A_AT 1553979_AT 1554868_S_AT 1559078_AT 1559946_S_AT 1567214_A_AT 1568763_S_AT 200050_AT 200679_X_AT 200942_S_AT 201039_S_AT 201091_S_AT 201175_AT 201218_AT 201223_S_AT 201266_AT 201280_S_AT 201300_S_AT 201304_AT 201327_S_AT 201363_S_AT 201369_S_AT 201376_S_AT 201384_S_AT 201483_S_AT 201518_AT 201626_AT 201637_S_AT 201678_S_AT 201687_S_AT 201699_AT 201879_AT 201898_S_AT 20191…
TF	Factor: Elk-1; motif: NNNNCCGGAARTNN; match class: 1	TF:M00025_1	false	0.0309014	1.51002	4534	604	182	20045	1552426_A_AT 1553678_A_AT 1553979_AT 1554078_S_AT 1554390_S_AT 1554868_S_AT 1559946_S_AT 1567214_A_AT 200679_X_AT 200942_S_AT 200970_S_AT 201039_S_AT 201091_S_AT 201266_AT 201300_S_AT 201363_S_AT 201376_S_AT 201483_S_AT 201568_AT 201595_S_AT 201699_AT 201757_AT 201917_S_AT 201930_AT 202041_S_AT 202060_AT 202138_X_AT 202209_AT 202292_X_AT 202298_AT 202325_S_AT 202428_X_AT 202574_S_AT 202673_AT 202…
TF	Factor: Elf-1; motif: NANCCGGAAGTN; match class: 1	TF:M11451_1	false	0.0309497	1.50934	2165	604	100	20045	1552426_A_AT 1554078_S_AT 1554390_S_AT 1568763_S_AT 200679_X_AT 200942_S_AT 200970_S_AT 201039_S_AT 201091_S_AT 201376_S_AT 201483_S_AT 201699_AT 201757_AT 202041_S_AT 202060_AT 202292_X_AT 202298_AT 202325_S_AT 202428_X_AT 202673_AT 202719_S_AT 202824_S_AT 202918_S_AT 203316_S_AT 203534_AT 204837_AT 205644_S_AT 205690_S_AT 206445_S_AT 208442_S_AT 208946_S_AT 209217_S_AT 209285_S_AT 211747_S_AT 2…
TF	Factor: Elk-1:OC-2; motif: RCCGGAASCGATCGATNN	TF:M08223	false	0.0320075	1.49475	12970	604	440	20045	1552426_A_AT 1552701_A_AT 1553575_AT 1553678_A_AT 1553979_AT 1554021_A_AT 1554078_S_AT 1554390_S_AT 1554868_S_AT 1559946_S_AT 1567214_A_AT 1568763_S_AT 1569594_A_AT 200050_AT 200679_X_AT 200942_S_AT 200970_S_AT 201039_S_AT 201091_S_AT 201138_S_AT 201175_AT 201266_AT 201280_S_AT 201327_S_AT 201363_S_AT 201369_S_AT 201384_S_AT 201483_S_AT 201518_AT 201568_AT 201569_S_AT 201626_AT 201637_S_AT 201687…
TF	Factor: Pet-1; motif: GCNGGAAGYG; match class: 1	TF:M09918_1	false	0.0325726	1.48715	7364	604	273	20045	1553575_AT 1553979_AT 1554021_A_AT 1554390_S_AT 1554868_S_AT 1567214_A_AT 1568763_S_AT 200679_X_AT 200942_S_AT 200970_S_AT 201175_AT 201363_S_AT 201376_S_AT 201384_S_AT 201483_S_AT 201518_AT 201568_AT 201678_S_AT 201699_AT 201757_AT 201898_S_AT 201930_AT 202041_S_AT 202097_AT 202171_AT 202279_AT 202292_X_AT 202298_AT 202325_S_AT 202425_X_AT 202428_X_AT 202574_S_AT 202673_AT 202719_S_AT 202798_AT …
TF	Factor: E2F-4; motif: GCGGGAAANA; match class: 1	TF:M02090_1	false	0.0330258	1.48115	6572	604	248	20045	1553678_A_AT 1554868_S_AT 1567214_A_AT 200942_S_AT 201039_S_AT 201091_S_AT 201218_AT 201223_S_AT 201280_S_AT 201300_S_AT 201304_AT 201327_S_AT 201363_S_AT 201369_S_AT 201376_S_AT 201384_S_AT 201408_AT 201518_AT 201569_S_AT 201626_AT 201637_S_AT 201678_S_AT 201754_AT 201879_AT 201917_S_AT 201930_AT 201971_S_AT 202097_AT 202171_AT 202209_AT 202292_X_AT 202325_S_AT 202425_X_AT 202428_X_AT 202460_S_A…
TF	Factor: PEA3; motif: NACCGGAAGTN; match class: 1	TF:M11428_1	false	0.0331283	1.4798	2196	604	101	20045	1552426_A_AT 1554390_S_AT 1567214_A_AT 1568763_S_AT 200679_X_AT 200942_S_AT 200970_S_AT 201039_S_AT 201363_S_AT 201376_S_AT 201483_S_AT 201568_AT 201699_AT 201757_AT 202041_S_AT 202060_AT 202292_X_AT 202298_AT 202325_S_AT 202428_X_AT 202673_AT 202918_S_AT 203316_S_AT 203534_AT 203781_AT 204837_AT 205644_S_AT 205668_AT 205690_S_AT 206445_S_AT 207812_S_AT 208442_S_AT 208946_S_AT 209014_AT 209217_S_…
TF	Factor: E2F-7; motif: GRGGCGGGAANNN; match class: 1	TF:M09896_1	false	0.0337398	1.47186	4903	604	194	20045	1553678_A_AT 1554021_A_AT 1559946_S_AT 1567214_A_AT 1568763_S_AT 201039_S_AT 201091_S_AT 201300_S_AT 201327_S_AT 201363_S_AT 201369_S_AT 201376_S_AT 201384_S_AT 201518_AT 201637_S_AT 201678_S_AT 201879_AT 201917_S_AT 201971_S_AT 202001_S_AT 202041_S_AT 202097_AT 202171_AT 202209_AT 202325_S_AT 202425_X_AT 202428_X_AT 202460_S_AT 202704_AT 202724_S_AT 202770_S_AT 202897_AT 203076_S_AT 203250_AT 20…
TF	Factor: AP-2gamma:Elk-1; motif: NGCCKNRGGSGRCGGAAGTG; match class: 1	TF:M08441_1	false	0.0337979	1.47111	13081	604	443	20045	1552426_A_AT 1552701_A_AT 1553678_A_AT 1553979_AT 1554021_A_AT 1554390_S_AT 1559078_AT 1559946_S_AT 1567214_A_AT 1568763_S_AT 200050_AT 200679_X_AT 200942_S_AT 200970_S_AT 201091_S_AT 201138_S_AT 201175_AT 201218_AT 201223_S_AT 201266_AT 201280_S_AT 201300_S_AT 201327_S_AT 201363_S_AT 201369_S_AT 201376_S_AT 201384_S_AT 201518_AT 201568_AT 201569_S_AT 201626_AT 201637_S_AT 201678_S_AT 201699_AT 2…
TF	Factor: ER81; motif: NACCGGAAGTN	TF:M11421	false	0.0358935	1.44498	2394	604	108	20045	1552426_A_AT 1554021_A_AT 1554390_S_AT 1568763_S_AT 200679_X_AT 200970_S_AT 201039_S_AT 201483_S_AT 201568_AT 201699_AT 201757_AT 202041_S_AT 202060_AT 202171_AT 202209_AT 202233_S_AT 202292_X_AT 202298_AT 202325_S_AT 202428_X_AT 202673_AT 203316_S_AT 204837_AT 205644_S_AT 205690_S_AT 207335_X_AT 208442_S_AT 208993_S_AT 209014_AT 209181_S_AT 209217_S_AT 209330_S_AT 211747_S_AT 212721_AT 213396_S_…
TF	Factor: Cdx-2; motif: NRTCGTAANNNN	TF:M10849	false	0.0367451	1.4348	11312	604	392	20045	1552426_A_AT 1552701_A_AT 1553575_AT 1554021_A_AT 1554078_S_AT 1554390_S_AT 1554868_S_AT 1559078_AT 1569594_A_AT 200050_AT 200942_S_AT 200970_S_AT 201039_S_AT 201091_S_AT 201138_S_AT 201175_AT 201218_AT 201266_AT 201300_S_AT 201304_AT 201327_S_AT 201363_S_AT 201369_S_AT 201384_S_AT 201483_S_AT 201518_AT 201595_S_AT 201626_AT 201637_S_AT 201687_S_AT 201713_S_AT 201754_AT 201757_AT 201879_AT 201917…
TF	Factor: SAP-1; motif: NRCCGGAWGYN	TF:M11437	false	0.0375546	1.42534	2847	604	124	20045	1552426_A_AT 1553575_AT 1554021_A_AT 1554390_S_AT 1568763_S_AT 200679_X_AT 200942_S_AT 200970_S_AT 201039_S_AT 201483_S_AT 201568_AT 201699_AT 201757_AT 202041_S_AT 202060_AT 202171_AT 202233_S_AT 202292_X_AT 202298_AT 202325_S_AT 202428_X_AT 202673_AT 203316_S_AT 203534_AT 204837_AT 205644_S_AT 205690_S_AT 206445_S_AT 207335_X_AT 208442_S_AT 208993_S_AT 209014_AT 209181_S_AT 209217_S_AT 209285_S…
TF	Factor: nerf; motif: NNNCCGGAAGTGN; match class: 1	TF:M09901_1	false	0.0377945	1.42257	1399	604	71	20045	1552426_A_AT 1554390_S_AT 1567214_A_AT 1568763_S_AT 200679_X_AT 200970_S_AT 201039_S_AT 201363_S_AT 201483_S_AT 201699_AT 201757_AT 202041_S_AT 202060_AT 202292_X_AT 202298_AT 202325_S_AT 202673_AT 202918_S_AT 203316_S_AT 204837_AT 205644_S_AT 205690_S_AT 206445_S_AT 209217_S_AT 211747_S_AT 212040_AT 212594_AT 212603_AT 212721_AT 213396_S_AT 215693_X_AT 217729_S_AT 218249_AT 221570_S_AT 222035_S_…
TF	Factor: ATF-3; motif: GGCGCSSNSNGRTSACGTSA; match class: 1	TF:M04744_1	false	0.0381607	1.41838	4973	604	196	20045	1553678_A_AT 1553979_AT 1554868_S_AT 1559078_AT 1567214_A_AT 200050_AT 200679_X_AT 200970_S_AT 201039_S_AT 201091_S_AT 201138_S_AT 201300_S_AT 201363_S_AT 201369_S_AT 201384_S_AT 201408_AT 201595_S_AT 201626_AT 201687_S_AT 201713_S_AT 201879_AT 201917_S_AT 201971_S_AT 202001_S_AT 202138_X_AT 202279_AT 202298_AT 202460_S_AT 202574_S_AT 202657_S_AT 202673_AT 202776_AT 203250_AT 203302_AT 203310_AT …
TF	Factor: PEA3; motif: NACCGGAAGTN	TF:M11425	false	0.0382968	1.41684	7570	604	279	20045	1552426_A_AT 1553575_AT 1553678_A_AT 1553979_AT 1554021_A_AT 1554078_S_AT 1554390_S_AT 1554868_S_AT 1559078_AT 1567214_A_AT 1568763_S_AT 200679_X_AT 200942_S_AT 200970_S_AT 201039_S_AT 201091_S_AT 201175_AT 201266_AT 201363_S_AT 201376_S_AT 201384_S_AT 201483_S_AT 201568_AT 201569_S_AT 201595_S_AT 201699_AT 201757_AT 201879_AT 202041_S_AT 202060_AT 202097_AT 202138_X_AT 202146_AT 202171_AT 202209…
TF	Factor: c-ets-1; motif: ACCGGAWGTN	TF:M02063	false	0.0383508	1.41623	7763	604	285	20045	1552426_A_AT 1553575_AT 1553678_A_AT 1553979_AT 1554021_A_AT 1554390_S_AT 1554868_S_AT 1567214_A_AT 1568763_S_AT 200679_X_AT 200942_S_AT 200970_S_AT 201039_S_AT 201175_AT 201266_AT 201363_S_AT 201376_S_AT 201384_S_AT 201483_S_AT 201568_AT 201569_S_AT 201595_S_AT 201626_AT 201699_AT 201754_AT 201757_AT 201879_AT 201917_S_AT 202041_S_AT 202060_AT 202138_X_AT 202146_AT 202171_AT 202209_AT 202233_S_A…
TF	Factor: ETV7; motif: NCCGGAANNN	TF:M02071	false	0.0405888	1.39159	10370	604	364	20045	1552426_A_AT 1553575_AT 1553678_A_AT 1553979_AT 1554021_A_AT 1554078_S_AT 1554390_S_AT 1554868_S_AT 1559078_AT 1559946_S_AT 1567214_A_AT 1568763_S_AT 200679_X_AT 200942_S_AT 200970_S_AT 201039_S_AT 201091_S_AT 201138_S_AT 201218_AT 201266_AT 201300_S_AT 201327_S_AT 201363_S_AT 201376_S_AT 201408_AT 201483_S_AT 201568_AT 201595_S_AT 201699_AT 201713_S_AT 201757_AT 201879_AT 201917_S_AT 201930_AT 2…
TF	Factor: GABP-alpha; motif: NRCCGGAAGTN	TF:M11415	false	0.0409407	1.38784	3341	604	141	20045	1552426_A_AT 1553575_AT 1554021_A_AT 1554390_S_AT 1567214_A_AT 1568763_S_AT 200679_X_AT 200942_S_AT 200970_S_AT 201039_S_AT 201363_S_AT 201483_S_AT 201568_AT 201699_AT 201757_AT 202041_S_AT 202060_AT 202138_X_AT 202171_AT 202233_S_AT 202292_X_AT 202298_AT 202325_S_AT 202428_X_AT 202460_S_AT 202673_AT 202719_S_AT 202918_S_AT 203316_S_AT 203534_AT 204837_AT 205644_S_AT 205690_S_AT 206445_S_AT 20733…
TF	Factor: Erm; motif: NNSCGGAWGYN	TF:M11424	false	0.0416947	1.37992	8353	604	303	20045	1552426_A_AT 1553575_AT 1553979_AT 1554021_A_AT 1554078_S_AT 1554390_S_AT 1554868_S_AT 1559078_AT 1567214_A_AT 1568763_S_AT 200679_X_AT 200942_S_AT 200970_S_AT 201039_S_AT 201091_S_AT 201175_AT 201266_AT 201280_S_AT 201300_S_AT 201363_S_AT 201376_S_AT 201384_S_AT 201483_S_AT 201518_AT 201568_AT 201569_S_AT 201595_S_AT 201699_AT 201754_AT 201757_AT 201879_AT 201898_S_AT 201930_AT 202041_S_AT 20206…
TF	Factor: ELF1; motif: AACCCGGAAGTR	TF:M03966	false	0.0421485	1.37522	6750	604	253	20045	1552426_A_AT 1552701_A_AT 1554021_A_AT 1554078_S_AT 1554390_S_AT 1554868_S_AT 1559946_S_AT 1567214_A_AT 1568763_S_AT 200679_X_AT 200942_S_AT 200970_S_AT 201039_S_AT 201138_S_AT 201175_AT 201369_S_AT 201376_S_AT 201384_S_AT 201483_S_AT 201568_AT 201569_S_AT 201699_AT 201754_AT 201757_AT 201879_AT 202041_S_AT 202060_AT 202146_AT 202171_AT 202233_S_AT 202279_AT 202292_X_AT 202298_AT 202325_S_AT 2024…
TF	Factor: SAP-1; motif: NNCCGGAAGTGN; match class: 1	TF:M09905_1	false	0.0427829	1.36873	3055	604	131	20045	1552426_A_AT 1553979_AT 1554390_S_AT 1554868_S_AT 1559946_S_AT 1567214_A_AT 200679_X_AT 200942_S_AT 200970_S_AT 201039_S_AT 201363_S_AT 201376_S_AT 201483_S_AT 201568_AT 201699_AT 201757_AT 202041_S_AT 202060_AT 202138_X_AT 202209_AT 202292_X_AT 202298_AT 202325_S_AT 202574_S_AT 202673_AT 202776_AT 202918_S_AT 203316_S_AT 203534_AT 204837_AT 205178_S_AT 205644_S_AT 205668_AT 205690_S_AT 206445_S_…
TF	Factor: E2F; motif: NKCGCGCSAAAN	TF:M00920	false	0.046304	1.33438	5849	604	224	20045	1553575_AT 1554390_S_AT 1559078_AT 1559946_S_AT 1567214_A_AT 1568763_S_AT 1569594_A_AT 200050_AT 201039_S_AT 201091_S_AT 201218_AT 201223_S_AT 201327_S_AT 201369_S_AT 201376_S_AT 201568_AT 201637_S_AT 201713_S_AT 201917_S_AT 201930_AT 202001_S_AT 202097_AT 202163_S_AT 202171_AT 202209_AT 202233_S_AT 202325_S_AT 202460_S_AT 202657_S_AT 202673_AT 202724_S_AT 202888_S_AT 203250_AT 203302_AT 203519_S…
TF	Factor: GKLF; motif: NNCCMCRCCCN	TF:M12173	false	0.0468149	1.32962	10282	604	361	20045	1552426_A_AT 1553678_A_AT 1553979_AT 1554021_A_AT 1554078_S_AT 1554390_S_AT 1554868_S_AT 1559078_AT 1559946_S_AT 1567214_A_AT 1568763_S_AT 200050_AT 200679_X_AT 200942_S_AT 201039_S_AT 201091_S_AT 201175_AT 201218_AT 201223_S_AT 201266_AT 201280_S_AT 201300_S_AT 201304_AT 201363_S_AT 201369_S_AT 201376_S_AT 201384_S_AT 201483_S_AT 201518_AT 201626_AT 201678_S_AT 201687_S_AT 201699_AT 201713_S_AT …
TF	Factor: Erg; motif: NNACCGGAARTSN; match class: 1	TF:M09608_1	false	0.0472133	1.32594	2437	604	109	20045	1552426_A_AT 1554390_S_AT 1559946_S_AT 1567214_A_AT 1568763_S_AT 200679_X_AT 200942_S_AT 200970_S_AT 201300_S_AT 201483_S_AT 201568_AT 201699_AT 202041_S_AT 202138_X_AT 202171_AT 202233_S_AT 202292_X_AT 202298_AT 202325_S_AT 202428_X_AT 202673_AT 202776_AT 203316_S_AT 203371_S_AT 204837_AT 205133_S_AT 205644_S_AT 205690_S_AT 207335_X_AT 207812_S_AT 208442_S_AT 208946_S_AT 209014_AT 209181_S_AT 20…
TF	Factor: GABP; motif: VCCGGAAGNGCR	TF:M00341	false	0.0479752	1.31898	8398	604	304	20045	1552426_A_AT 1553678_A_AT 1553979_AT 1554021_A_AT 1554390_S_AT 1554868_S_AT 1559078_AT 1559946_S_AT 1567214_A_AT 1568763_S_AT 200679_X_AT 200942_S_AT 200970_S_AT 201039_S_AT 201091_S_AT 201138_S_AT 201175_AT 201223_S_AT 201300_S_AT 201363_S_AT 201376_S_AT 201384_S_AT 201483_S_AT 201518_AT 201595_S_AT 201626_AT 201637_S_AT 201678_S_AT 201687_S_AT 201699_AT 201757_AT 201879_AT 201930_AT 202041_S_AT…
TF	Factor: ELF3; motif: WACCCGGAAGTAN	TF:M03967	false	0.0483622	1.31549	7751	604	284	20045	1552426_A_AT 1553575_AT 1553678_A_AT 1554021_A_AT 1554078_S_AT 1554390_S_AT 1554868_S_AT 1559946_S_AT 1567214_A_AT 1568763_S_AT 200679_X_AT 200942_S_AT 200970_S_AT 201039_S_AT 201091_S_AT 201138_S_AT 201175_AT 201376_S_AT 201384_S_AT 201483_S_AT 201568_AT 201569_S_AT 201626_AT 201678_S_AT 201699_AT 201754_AT 201757_AT 202041_S_AT 202060_AT 202146_AT 202171_AT 202209_AT 202233_S_AT 202279_AT 20229…
TF	Factor: ERG; motif: ACCGGAART	TF:M01752	false	0.0491632	1.30836	9651	604	342	20045	1552426_A_AT 1553575_AT 1553678_A_AT 1553979_AT 1554021_A_AT 1554078_S_AT 1554390_S_AT 1554868_S_AT 1559078_AT 1559946_S_AT 1567214_A_AT 1568763_S_AT 200679_X_AT 200942_S_AT 200970_S_AT 201039_S_AT 201091_S_AT 201175_AT 201266_AT 201300_S_AT 201327_S_AT 201363_S_AT 201376_S_AT 201384_S_AT 201483_S_AT 201568_AT 201569_S_AT 201595_S_AT 201699_AT 201754_AT 201757_AT 201879_AT 201917_S_AT 202041_S_AT…
TF	Factor: E2F-4; motif: NGGCGGGAARN; match class: 1	TF:M07084_1	false	0.0491788	1.30822	5606	604	216	20045	1552426_A_AT 1553678_A_AT 1554868_S_AT 1567214_A_AT 1568763_S_AT 201039_S_AT 201091_S_AT 201218_AT 201327_S_AT 201363_S_AT 201369_S_AT 201376_S_AT 201384_S_AT 201408_AT 201483_S_AT 201518_AT 201637_S_AT 201678_S_AT 201879_AT 201917_S_AT 201971_S_AT 202001_S_AT 202041_S_AT 202097_AT 202171_AT 202209_AT 202279_AT 202325_S_AT 202428_X_AT 202460_S_AT 202574_S_AT 202657_S_AT 202704_AT 202724_S_AT 2028…
TF	Factor: Erm; motif: ACCGGAAGTN	TF:M02069	false	0.0495151	1.30526	7049	604	262	20045	1552426_A_AT 1553575_AT 1554021_A_AT 1554078_S_AT 1554390_S_AT 1559946_S_AT 1567214_A_AT 1568763_S_AT 200679_X_AT 200942_S_AT 200970_S_AT 201039_S_AT 201175_AT 201266_AT 201300_S_AT 201363_S_AT 201376_S_AT 201384_S_AT 201483_S_AT 201568_AT 201569_S_AT 201595_S_AT 201626_AT 201699_AT 201757_AT 201879_AT 201917_S_AT 202041_S_AT 202060_AT 202138_X_AT 202171_AT 202209_AT 202233_S_AT 202292_X_AT 20229…
TF	Factor: ETV4; motif: ACCGGAAGTN	TF:M03982	false	0.0498415	1.30241	6986	604	260	20045	1552426_A_AT 1553575_AT 1553979_AT 1554021_A_AT 1554078_S_AT 1554390_S_AT 1554868_S_AT 1559078_AT 1567214_A_AT 1568763_S_AT 200679_X_AT 200942_S_AT 200970_S_AT 201039_S_AT 201091_S_AT 201266_AT 201363_S_AT 201376_S_AT 201384_S_AT 201483_S_AT 201568_AT 201595_S_AT 201699_AT 201757_AT 201879_AT 201917_S_AT 202041_S_AT 202060_AT 202138_X_AT 202163_S_AT 202171_AT 202209_AT 202233_S_AT 202292_X_AT 202…
MIRNA	hsa-miR-887-5p	MIRNA:hsa-miR-887-5p	false	0.00942623	2.02566	469	547	37	14819	1554868_S_AT 1555756_A_AT 201568_AT 201757_AT 201971_S_AT 202719_S_AT 202776_AT 205484_AT 206074_S_AT 209285_S_AT 215012_AT 218178_S_AT 219024_AT 221983_AT 224576_AT 224957_AT 225515_S_AT 225517_AT 225810_AT 226277_AT 227200_AT 228992_AT 235222_X_AT 236301_AT 47608_AT 1558251_A_AT 1559006_AT 202932_AT 205351_AT 207855_S_AT 211525_S_AT 220260_AT 232245_AT 234756_AT 237106_AT 239259_AT 243696_AT
MIRNA	hsa-miR-106b-5p	MIRNA:hsa-miR-106b-5p	false	0.0303828	1.51737	1085	547	66	14819	1553678_A_AT 1554021_A_AT 1554390_S_AT 200679_X_AT 201223_S_AT 201280_S_AT 201300_S_AT 201518_AT 201568_AT 201626_AT 202209_AT 202776_AT 202824_S_AT 203693_S_AT 204837_AT 205594_AT 206875_S_AT 208003_S_AT 208728_S_AT 208808_S_AT 210276_S_AT 212040_AT 212289_AT 212382_AT 212591_AT 212956_AT 214259_S_AT 214875_X_AT 215716_S_AT 218386_X_AT 221751_AT 222104_X_AT 222231_S_AT 222448_S_AT 223132_S_AT 22…
MIRNA	hsa-miR-155-5p	MIRNA:hsa-miR-155-5p	false	0.0357785	1.44638	921	547	58	14819	1554390_S_AT 201223_S_AT 201266_AT 202171_AT 202209_AT 202574_S_AT 202657_S_AT 202798_AT 202888_S_AT 203076_S_AT 203519_S_AT 203667_AT 204132_S_AT 205594_AT 205690_S_AT 205849_S_AT 208003_S_AT 208863_S_AT 211989_AT 212209_AT 212289_AT 212382_AT 212594_AT 213396_S_AT 213746_S_AT 214259_S_AT 215691_X_AT 218303_X_AT 219737_S_AT 222035_S_AT 222231_S_AT 222473_S_AT 224068_X_AT 224570_S_AT 224576_AT 22…
MIRNA	hsa-miR-21-5p	MIRNA:hsa-miR-21-5p	false	0.0372525	1.42884	636	547	44	14819	1554390_S_AT 200679_X_AT 201363_S_AT 202724_S_AT 203693_S_AT 204132_S_AT 204837_AT 205849_S_AT 206875_S_AT 208003_S_AT 208924_AT 210962_S_AT 212382_AT 212442_S_AT 212594_AT 212721_AT 213939_S_AT 219024_AT 219402_S_AT 224862_AT 225326_AT 225892_AT 226150_AT 227627_AT 229513_AT 230263_S_AT 231848_X_AT 1555068_AT 1555996_S_AT 1556064_AT 1558251_A_AT 1570251_AT 201016_AT 206825_AT 209334_S_AT 209708_…
MIRNA	hsa-let-7e-5p	MIRNA:hsa-let-7e-5p	false	0.0494942	1.30545	604	547	42	14819	200679_X_AT 201138_S_AT 201266_AT 201483_S_AT 201713_S_AT 201757_AT 201879_AT 203675_AT 205118_AT 205594_AT 206074_S_AT 208993_S_AT 212040_AT 212209_AT 212382_AT 214512_S_AT 215012_AT 217772_S_AT 217952_X_AT 218223_S_AT 219598_S_AT 221763_AT 223067_AT 223157_AT 225517_AT 229467_AT 235222_X_AT 236301_AT 244354_AT 1558251_A_AT 1559006_AT 204348_S_AT 209401_S_AT 220260_AT 230523_AT 232861_AT 236122_…
HPA	appendix	HPA:0030000	false	3.30858e-17	16.4804	7831	442	392	11019	1554078_S_AT 1554390_S_AT 1554868_S_AT 1559078_AT 1559946_S_AT 1567214_A_AT 1569594_A_AT 200050_AT 200679_X_AT 200970_S_AT 201039_S_AT 201091_S_AT 201138_S_AT 201175_AT 201218_AT 201223_S_AT 201266_AT 201304_AT 201327_S_AT 201363_S_AT 201369_S_AT 201376_S_AT 201384_S_AT 201408_AT 201518_AT 201568_AT 201569_S_AT 201595_S_AT 201637_S_AT 201678_S_AT 201687_S_AT 201699_AT 201713_S_AT 201754_AT 201757…
HPA	lymph node	HPA:0310000	false	2.22735e-16	15.6522	6530	442	348	11019	1554078_S_AT 1554390_S_AT 1554868_S_AT 1567214_A_AT 1569594_A_AT 200050_AT 200679_X_AT 200970_S_AT 201039_S_AT 201091_S_AT 201138_S_AT 201175_AT 201218_AT 201223_S_AT 201266_AT 201280_S_AT 201304_AT 201327_S_AT 201363_S_AT 201369_S_AT 201376_S_AT 201384_S_AT 201408_AT 201518_AT 201568_AT 201569_S_AT 201595_S_AT 201637_S_AT 201678_S_AT 201687_S_AT 201699_AT 201713_S_AT 201754_AT 201757_AT 201879_A…
HPA	cervix	HPA:0630000	false	8.24555e-15	14.0838	6930	442	358	11019	1554078_S_AT 1554390_S_AT 1554868_S_AT 1559078_AT 1559946_S_AT 1567214_A_AT 1569594_A_AT 200050_AT 200679_X_AT 200970_S_AT 201039_S_AT 201091_S_AT 201138_S_AT 201175_AT 201218_AT 201223_S_AT 201266_AT 201280_S_AT 201304_AT 201327_S_AT 201363_S_AT 201369_S_AT 201376_S_AT 201384_S_AT 201408_AT 201518_AT 201568_AT 201569_S_AT 201595_S_AT 201637_S_AT 201678_S_AT 201687_S_AT 201699_AT 201713_S_AT 2017…
HPA	breast	HPA:0050000	false	1.40617e-14	13.852	7185	442	366	11019	1553678_A_AT 1554078_S_AT 1554390_S_AT 1554868_S_AT 1559078_AT 1567214_A_AT 1569594_A_AT 200050_AT 200679_X_AT 200970_S_AT 201039_S_AT 201091_S_AT 201138_S_AT 201175_AT 201218_AT 201223_S_AT 201266_AT 201280_S_AT 201304_AT 201327_S_AT 201363_S_AT 201369_S_AT 201376_S_AT 201384_S_AT 201408_AT 201518_AT 201568_AT 201569_S_AT 201595_S_AT 201637_S_AT 201678_S_AT 201687_S_AT 201699_AT 201713_S_AT 2017…
HPA	pancreas	HPA:0350000	false	1.98133e-14	13.703	7409	442	373	11019	1554078_S_AT 1554390_S_AT 1554868_S_AT 1559946_S_AT 1567214_A_AT 1569594_A_AT 200050_AT 200679_X_AT 200970_S_AT 201039_S_AT 201091_S_AT 201138_S_AT 201175_AT 201218_AT 201223_S_AT 201266_AT 201280_S_AT 201300_S_AT 201304_AT 201327_S_AT 201363_S_AT 201369_S_AT 201376_S_AT 201384_S_AT 201408_AT 201518_AT 201568_AT 201569_S_AT 201595_S_AT 201637_S_AT 201678_S_AT 201687_S_AT 201699_AT 201713_S_AT 201…
HPA	lymph node; non-germinal center cells[в‰ҐLow]	HPA:0310441	false	2.7323e-14	13.5635	6061	442	326	11019	1554078_S_AT 1554390_S_AT 1554868_S_AT 1567214_A_AT 1569594_A_AT 200050_AT 200679_X_AT 200970_S_AT 201039_S_AT 201091_S_AT 201138_S_AT 201218_AT 201223_S_AT 201266_AT 201280_S_AT 201304_AT 201327_S_AT 201363_S_AT 201369_S_AT 201376_S_AT 201384_S_AT 201408_AT 201518_AT 201568_AT 201569_S_AT 201595_S_AT 201637_S_AT 201678_S_AT 201687_S_AT 201699_AT 201713_S_AT 201754_AT 201757_AT 201879_AT 201917_S…
HPA	tonsil	HPA:0600000	false	5.91879e-14	13.2278	7788	442	384	11019	1554078_S_AT 1554390_S_AT 1554868_S_AT 1559078_AT 1559946_S_AT 1567214_A_AT 1569594_A_AT 200050_AT 200679_X_AT 200970_S_AT 201039_S_AT 201091_S_AT 201138_S_AT 201175_AT 201218_AT 201223_S_AT 201266_AT 201280_S_AT 201304_AT 201327_S_AT 201363_S_AT 201369_S_AT 201376_S_AT 201384_S_AT 201408_AT 201518_AT 201568_AT 201569_S_AT 201595_S_AT 201637_S_AT 201678_S_AT 201687_S_AT 201699_AT 201713_S_AT 2017…
HPA	urinary bladder; urothelial cells[в‰ҐLow]	HPA:0610831	false	9.23901e-14	13.0344	7304	442	368	11019	1553678_A_AT 1554078_S_AT 1554390_S_AT 1554868_S_AT 1559078_AT 1559946_S_AT 1567214_A_AT 1569594_A_AT 200050_AT 200679_X_AT 201039_S_AT 201091_S_AT 201138_S_AT 201175_AT 201218_AT 201223_S_AT 201266_AT 201280_S_AT 201304_AT 201327_S_AT 201369_S_AT 201376_S_AT 201384_S_AT 201408_AT 201518_AT 201568_AT 201569_S_AT 201595_S_AT 201637_S_AT 201678_S_AT 201687_S_AT 201699_AT 201713_S_AT 201754_AT 20175…
HPA	urinary bladder	HPA:0610000	false	9.23901e-14	13.0344	7304	442	368	11019	1553678_A_AT 1554078_S_AT 1554390_S_AT 1554868_S_AT 1559078_AT 1559946_S_AT 1567214_A_AT 1569594_A_AT 200050_AT 200679_X_AT 201039_S_AT 201091_S_AT 201138_S_AT 201175_AT 201218_AT 201223_S_AT 201266_AT 201280_S_AT 201304_AT 201327_S_AT 201369_S_AT 201376_S_AT 201384_S_AT 201408_AT 201518_AT 201568_AT 201569_S_AT 201595_S_AT 201637_S_AT 201678_S_AT 201687_S_AT 201699_AT 201713_S_AT 201754_AT 20175…
HPA	kidney	HPA:0270000	false	1.2078e-13	12.918	8237	442	397	11019	1553678_A_AT 1554078_S_AT 1554390_S_AT 1554868_S_AT 1559078_AT 1559946_S_AT 1567214_A_AT 1569594_A_AT 200050_AT 200679_X_AT 200970_S_AT 201039_S_AT 201091_S_AT 201138_S_AT 201175_AT 201218_AT 201223_S_AT 201266_AT 201280_S_AT 201304_AT 201327_S_AT 201363_S_AT 201369_S_AT 201376_S_AT 201384_S_AT 201408_AT 201518_AT 201568_AT 201569_S_AT 201595_S_AT 201637_S_AT 201678_S_AT 201687_S_AT 201699_AT 201…
HPA	rectum	HPA:0400000	false	1.27372e-13	12.8949	7973	442	389	11019	1553678_A_AT 1554078_S_AT 1554390_S_AT 1554868_S_AT 1559946_S_AT 1567214_A_AT 1569594_A_AT 200050_AT 200679_X_AT 200970_S_AT 201039_S_AT 201091_S_AT 201138_S_AT 201175_AT 201218_AT 201223_S_AT 201266_AT 201280_S_AT 201300_S_AT 201304_AT 201327_S_AT 201363_S_AT 201369_S_AT 201376_S_AT 201384_S_AT 201408_AT 201518_AT 201568_AT 201569_S_AT 201595_S_AT 201637_S_AT 201678_S_AT 201687_S_AT 201699_AT 20…
HPA	cervix; glandular cells[в‰ҐLow]	HPA:0630051	false	1.84705e-13	12.7335	5692	442	310	11019	1554078_S_AT 1554390_S_AT 1554868_S_AT 1559946_S_AT 1567214_A_AT 1569594_A_AT 200050_AT 200679_X_AT 201039_S_AT 201091_S_AT 201138_S_AT 201218_AT 201223_S_AT 201266_AT 201280_S_AT 201304_AT 201327_S_AT 201363_S_AT 201384_S_AT 201408_AT 201518_AT 201568_AT 201595_S_AT 201637_S_AT 201678_S_AT 201687_S_AT 201699_AT 201713_S_AT 201754_AT 201757_AT 201879_AT 201930_AT 202041_S_AT 202060_AT 202097_AT 2…
HPA	endometrium 1	HPA:0160000	false	4.3501e-13	12.3615	7055	442	358	11019	1553678_A_AT 1554078_S_AT 1554390_S_AT 1554868_S_AT 1559946_S_AT 1567214_A_AT 1569594_A_AT 200050_AT 200679_X_AT 200970_S_AT 201039_S_AT 201091_S_AT 201138_S_AT 201218_AT 201223_S_AT 201266_AT 201280_S_AT 201304_AT 201327_S_AT 201363_S_AT 201369_S_AT 201376_S_AT 201384_S_AT 201408_AT 201518_AT 201568_AT 201569_S_AT 201595_S_AT 201637_S_AT 201678_S_AT 201687_S_AT 201699_AT 201713_S_AT 201754_AT 20…
HPA	breast; glandular cells[в‰ҐLow]	HPA:0050051	false	7.92888e-13	12.1008	6813	442	349	11019	1554078_S_AT 1554390_S_AT 1554868_S_AT 1559078_AT 1567214_A_AT 1569594_A_AT 200050_AT 200679_X_AT 200970_S_AT 201039_S_AT 201091_S_AT 201138_S_AT 201175_AT 201218_AT 201223_S_AT 201266_AT 201280_S_AT 201304_AT 201327_S_AT 201363_S_AT 201369_S_AT 201376_S_AT 201384_S_AT 201408_AT 201518_AT 201568_AT 201569_S_AT 201595_S_AT 201637_S_AT 201678_S_AT 201699_AT 201713_S_AT 201754_AT 201757_AT 201879_AT…
HPA	gallbladder; glandular cells[в‰ҐLow]	HPA:0220051	false	1.29514e-12	11.8877	7664	442	377	11019	1554078_S_AT 1554390_S_AT 1554868_S_AT 1559946_S_AT 1569594_A_AT 200050_AT 200679_X_AT 200970_S_AT 201039_S_AT 201091_S_AT 201138_S_AT 201175_AT 201218_AT 201223_S_AT 201266_AT 201280_S_AT 201304_AT 201327_S_AT 201363_S_AT 201369_S_AT 201376_S_AT 201384_S_AT 201408_AT 201518_AT 201568_AT 201569_S_AT 201595_S_AT 201637_S_AT 201678_S_AT 201687_S_AT 201699_AT 201713_S_AT 201754_AT 201757_AT 201879_A…
HPA	gallbladder	HPA:0220000	false	1.29514e-12	11.8877	7664	442	377	11019	1554078_S_AT 1554390_S_AT 1554868_S_AT 1559946_S_AT 1569594_A_AT 200050_AT 200679_X_AT 200970_S_AT 201039_S_AT 201091_S_AT 201138_S_AT 201175_AT 201218_AT 201223_S_AT 201266_AT 201280_S_AT 201304_AT 201327_S_AT 201363_S_AT 201369_S_AT 201376_S_AT 201384_S_AT 201408_AT 201518_AT 201568_AT 201569_S_AT 201595_S_AT 201637_S_AT 201678_S_AT 201687_S_AT 201699_AT 201713_S_AT 201754_AT 201757_AT 201879_A…
HPA	stomach 1	HPA:0540000	false	1.29514e-12	11.8877	7664	442	377	11019	1554078_S_AT 1554390_S_AT 1554868_S_AT 1559078_AT 1567214_A_AT 1569594_A_AT 200050_AT 200679_X_AT 200970_S_AT 201039_S_AT 201091_S_AT 201138_S_AT 201175_AT 201218_AT 201223_S_AT 201266_AT 201280_S_AT 201304_AT 201327_S_AT 201363_S_AT 201369_S_AT 201376_S_AT 201384_S_AT 201408_AT 201518_AT 201568_AT 201569_S_AT 201595_S_AT 201637_S_AT 201678_S_AT 201687_S_AT 201699_AT 201713_S_AT 201754_AT 201757_…
HPA	stomach 1; glandular cells[в‰ҐLow]	HPA:0540051	false	1.29514e-12	11.8877	7664	442	377	11019	1554078_S_AT 1554390_S_AT 1554868_S_AT 1559078_AT 1567214_A_AT 1569594_A_AT 200050_AT 200679_X_AT 200970_S_AT 201039_S_AT 201091_S_AT 201138_S_AT 201175_AT 201218_AT 201223_S_AT 201266_AT 201280_S_AT 201304_AT 201327_S_AT 201363_S_AT 201369_S_AT 201376_S_AT 201384_S_AT 201408_AT 201518_AT 201568_AT 201569_S_AT 201595_S_AT 201637_S_AT 201678_S_AT 201687_S_AT 201699_AT 201713_S_AT 201754_AT 201757_…
HPA	appendix; glandular cells[в‰ҐLow]	HPA:0030051	false	1.63481e-12	11.7865	6751	442	346	11019	1554078_S_AT 1554390_S_AT 1554868_S_AT 1559078_AT 1559946_S_AT 1567214_A_AT 1569594_A_AT 200050_AT 200970_S_AT 201039_S_AT 201091_S_AT 201138_S_AT 201175_AT 201218_AT 201223_S_AT 201266_AT 201304_AT 201327_S_AT 201363_S_AT 201369_S_AT 201376_S_AT 201384_S_AT 201518_AT 201568_AT 201569_S_AT 201595_S_AT 201637_S_AT 201678_S_AT 201687_S_AT 201699_AT 201713_S_AT 201754_AT 201757_AT 201879_AT 201917_S…
HPA	epididymis	HPA:0180000	false	1.69962e-12	11.7696	7337	442	366	11019	1554078_S_AT 1554390_S_AT 1554868_S_AT 1567214_A_AT 1569594_A_AT 200050_AT 200679_X_AT 201039_S_AT 201091_S_AT 201138_S_AT 201175_AT 201218_AT 201223_S_AT 201266_AT 201280_S_AT 201304_AT 201327_S_AT 201363_S_AT 201369_S_AT 201376_S_AT 201384_S_AT 201408_AT 201518_AT 201568_AT 201569_S_AT 201595_S_AT 201637_S_AT 201678_S_AT 201687_S_AT 201699_AT 201713_S_AT 201754_AT 201757_AT 201879_AT 201917_S_A…
HPA	epididymis; glandular cells[в‰ҐLow]	HPA:0180051	false	1.69962e-12	11.7696	7337	442	366	11019	1554078_S_AT 1554390_S_AT 1554868_S_AT 1567214_A_AT 1569594_A_AT 200050_AT 200679_X_AT 201039_S_AT 201091_S_AT 201138_S_AT 201175_AT 201218_AT 201223_S_AT 201266_AT 201280_S_AT 201304_AT 201327_S_AT 201363_S_AT 201369_S_AT 201376_S_AT 201384_S_AT 201408_AT 201518_AT 201568_AT 201569_S_AT 201595_S_AT 201637_S_AT 201678_S_AT 201687_S_AT 201699_AT 201713_S_AT 201754_AT 201757_AT 201879_AT 201917_S_A…
HPA	stomach 2; glandular cells[в‰ҐLow]	HPA:0550051	false	1.76182e-12	11.754	7612	442	375	11019	1554078_S_AT 1554390_S_AT 1554868_S_AT 1559078_AT 1559946_S_AT 1567214_A_AT 1569594_A_AT 200050_AT 200679_X_AT 200970_S_AT 201039_S_AT 201091_S_AT 201138_S_AT 201175_AT 201218_AT 201223_S_AT 201266_AT 201280_S_AT 201304_AT 201327_S_AT 201363_S_AT 201369_S_AT 201376_S_AT 201384_S_AT 201408_AT 201518_AT 201568_AT 201569_S_AT 201595_S_AT 201637_S_AT 201678_S_AT 201687_S_AT 201699_AT 201713_S_AT 2017…
HPA	stomach 2	HPA:0550000	false	1.76182e-12	11.754	7612	442	375	11019	1554078_S_AT 1554390_S_AT 1554868_S_AT 1559078_AT 1559946_S_AT 1567214_A_AT 1569594_A_AT 200050_AT 200679_X_AT 200970_S_AT 201039_S_AT 201091_S_AT 201138_S_AT 201175_AT 201218_AT 201223_S_AT 201266_AT 201280_S_AT 201304_AT 201327_S_AT 201363_S_AT 201369_S_AT 201376_S_AT 201384_S_AT 201408_AT 201518_AT 201568_AT 201569_S_AT 201595_S_AT 201637_S_AT 201678_S_AT 201687_S_AT 201699_AT 201713_S_AT 2017…
HPA	thyroid gland; glandular cells[в‰ҐLow]	HPA:0590051	false	1.81211e-12	11.7418	7131	442	359	11019	1554078_S_AT 1554390_S_AT 1554868_S_AT 1567214_A_AT 1569594_A_AT 200050_AT 200679_X_AT 200970_S_AT 201039_S_AT 201091_S_AT 201138_S_AT 201218_AT 201223_S_AT 201266_AT 201280_S_AT 201304_AT 201327_S_AT 201363_S_AT 201369_S_AT 201376_S_AT 201384_S_AT 201408_AT 201518_AT 201568_AT 201569_S_AT 201595_S_AT 201637_S_AT 201678_S_AT 201687_S_AT 201699_AT 201713_S_AT 201754_AT 201757_AT 201879_AT 201930_A…
HPA	thyroid gland	HPA:0590000	false	1.81211e-12	11.7418	7131	442	359	11019	1554078_S_AT 1554390_S_AT 1554868_S_AT 1567214_A_AT 1569594_A_AT 200050_AT 200679_X_AT 200970_S_AT 201039_S_AT 201091_S_AT 201138_S_AT 201218_AT 201223_S_AT 201266_AT 201280_S_AT 201304_AT 201327_S_AT 201363_S_AT 201369_S_AT 201376_S_AT 201384_S_AT 201408_AT 201518_AT 201568_AT 201569_S_AT 201595_S_AT 201637_S_AT 201678_S_AT 201687_S_AT 201699_AT 201713_S_AT 201754_AT 201757_AT 201879_AT 201930_A…
HPA	endometrium 1; glandular cells[в‰ҐLow]	HPA:0160051	false	2.19828e-12	11.6579	6818	442	348	11019	1553678_A_AT 1554078_S_AT 1554390_S_AT 1554868_S_AT 1559946_S_AT 1567214_A_AT 1569594_A_AT 200050_AT 200679_X_AT 200970_S_AT 201039_S_AT 201091_S_AT 201138_S_AT 201218_AT 201223_S_AT 201266_AT 201280_S_AT 201304_AT 201327_S_AT 201363_S_AT 201369_S_AT 201384_S_AT 201408_AT 201518_AT 201568_AT 201569_S_AT 201595_S_AT 201637_S_AT 201678_S_AT 201687_S_AT 201699_AT 201713_S_AT 201754_AT 201757_AT 2018…
HPA	spleen	HPA:0530000	false	3.31665e-12	11.4793	5893	442	314	11019	1554078_S_AT 1554390_S_AT 1554868_S_AT 1559078_AT 1559946_S_AT 1567214_A_AT 1569594_A_AT 200050_AT 200679_X_AT 200970_S_AT 201039_S_AT 201091_S_AT 201138_S_AT 201223_S_AT 201266_AT 201280_S_AT 201304_AT 201327_S_AT 201363_S_AT 201369_S_AT 201376_S_AT 201518_AT 201569_S_AT 201595_S_AT 201678_S_AT 201699_AT 201713_S_AT 201754_AT 201757_AT 201879_AT 201917_S_AT 201930_AT 201971_S_AT 202060_AT 202097…
HPA	appendix; lymphoid tissue[в‰ҐLow]	HPA:0030071	false	6.05804e-12	11.2177	4734	442	268	11019	1554078_S_AT 1554390_S_AT 1554868_S_AT 1559078_AT 1559946_S_AT 1567214_A_AT 1569594_A_AT 200050_AT 201091_S_AT 201138_S_AT 201218_AT 201223_S_AT 201266_AT 201304_AT 201327_S_AT 201363_S_AT 201369_S_AT 201376_S_AT 201518_AT 201569_S_AT 201595_S_AT 201637_S_AT 201678_S_AT 201687_S_AT 201699_AT 201713_S_AT 201754_AT 201917_S_AT 201971_S_AT 202060_AT 202097_AT 202138_X_AT 202146_AT 202163_S_AT 202279…
HPA	rectum; glandular cells[в‰ҐLow]	HPA:0400051	false	8.89148e-12	11.051	7067	442	355	11019	1553678_A_AT 1554078_S_AT 1554390_S_AT 1554868_S_AT 1559946_S_AT 1567214_A_AT 1569594_A_AT 200050_AT 200970_S_AT 201039_S_AT 201091_S_AT 201138_S_AT 201175_AT 201218_AT 201223_S_AT 201266_AT 201304_AT 201327_S_AT 201363_S_AT 201369_S_AT 201376_S_AT 201384_S_AT 201518_AT 201568_AT 201569_S_AT 201595_S_AT 201637_S_AT 201678_S_AT 201687_S_AT 201699_AT 201713_S_AT 201754_AT 201757_AT 201879_AT 201917…
HPA	fallopian tube	HPA:0210000	false	1.35861e-11	10.8669	7466	442	368	11019	1554078_S_AT 1554390_S_AT 1554868_S_AT 1559078_AT 1559946_S_AT 1567214_A_AT 1569594_A_AT 200050_AT 200679_X_AT 200970_S_AT 201039_S_AT 201091_S_AT 201138_S_AT 201175_AT 201218_AT 201223_S_AT 201266_AT 201280_S_AT 201304_AT 201327_S_AT 201363_S_AT 201369_S_AT 201376_S_AT 201384_S_AT 201408_AT 201518_AT 201568_AT 201569_S_AT 201595_S_AT 201637_S_AT 201678_S_AT 201687_S_AT 201699_AT 201713_S_AT 2017…
HPA	pancreas; exocrine glandular cells[в‰ҐLow]	HPA:0350471	false	1.58151e-11	10.8009	6942	442	350	11019	1554078_S_AT 1554390_S_AT 1554868_S_AT 1559946_S_AT 1567214_A_AT 1569594_A_AT 200050_AT 200679_X_AT 200970_S_AT 201039_S_AT 201091_S_AT 201138_S_AT 201175_AT 201218_AT 201223_S_AT 201266_AT 201280_S_AT 201304_AT 201327_S_AT 201363_S_AT 201369_S_AT 201376_S_AT 201384_S_AT 201408_AT 201518_AT 201568_AT 201569_S_AT 201595_S_AT 201637_S_AT 201678_S_AT 201687_S_AT 201699_AT 201713_S_AT 201754_AT 20175…
HPA	small intestine	HPA:0480000	false	1.93985e-11	10.7122	7877	442	381	11019	1554078_S_AT 1554390_S_AT 1554868_S_AT 1559078_AT 1567214_A_AT 1569594_A_AT 200050_AT 200679_X_AT 200970_S_AT 201039_S_AT 201091_S_AT 201138_S_AT 201175_AT 201218_AT 201223_S_AT 201266_AT 201304_AT 201327_S_AT 201363_S_AT 201369_S_AT 201376_S_AT 201384_S_AT 201408_AT 201518_AT 201568_AT 201569_S_AT 201595_S_AT 201637_S_AT 201678_S_AT 201687_S_AT 201699_AT 201713_S_AT 201754_AT 201757_AT 201879_AT…
HPA	tonsil; non-germinal center cells[в‰ҐLow]	HPA:0600441	false	2.09913e-11	10.678	6117	442	320	11019	1554078_S_AT 1554390_S_AT 1554868_S_AT 1559078_AT 1559946_S_AT 1567214_A_AT 1569594_A_AT 200050_AT 200679_X_AT 200970_S_AT 201039_S_AT 201091_S_AT 201138_S_AT 201218_AT 201223_S_AT 201266_AT 201280_S_AT 201304_AT 201363_S_AT 201369_S_AT 201376_S_AT 201384_S_AT 201408_AT 201518_AT 201568_AT 201569_S_AT 201595_S_AT 201637_S_AT 201678_S_AT 201687_S_AT 201699_AT 201713_S_AT 201754_AT 201757_AT 201879…
HPA	cerebral cortex	HPA:0100000	false	2.3949e-11	10.6207	8106	442	388	11019	1553678_A_AT 1554078_S_AT 1554390_S_AT 1554868_S_AT 1559078_AT 1567214_A_AT 1569594_A_AT 200050_AT 200679_X_AT 200970_S_AT 201039_S_AT 201091_S_AT 201138_S_AT 201175_AT 201218_AT 201223_S_AT 201266_AT 201280_S_AT 201300_S_AT 201304_AT 201327_S_AT 201363_S_AT 201376_S_AT 201384_S_AT 201408_AT 201518_AT 201568_AT 201569_S_AT 201595_S_AT 201637_S_AT 201678_S_AT 201687_S_AT 201699_AT 201713_S_AT 2017…
HPA	cerebellum	HPA:0090000	false	3.56795e-11	10.4476	7202	442	358	11019	1554078_S_AT 1554390_S_AT 1554868_S_AT 1559078_AT 1567214_A_AT 1569594_A_AT 200050_AT 200679_X_AT 200970_S_AT 201039_S_AT 201091_S_AT 201138_S_AT 201175_AT 201223_S_AT 201266_AT 201280_S_AT 201300_S_AT 201304_AT 201327_S_AT 201363_S_AT 201376_S_AT 201384_S_AT 201408_AT 201518_AT 201568_AT 201569_S_AT 201595_S_AT 201637_S_AT 201687_S_AT 201699_AT 201713_S_AT 201754_AT 201757_AT 201879_AT 201917_S_…
HPA	tonsil; germinal center cells[в‰ҐLow]	HPA:0600431	false	5.11229e-11	10.2914	5987	442	314	11019	1554078_S_AT 1554390_S_AT 1554868_S_AT 1559078_AT 1559946_S_AT 1567214_A_AT 1569594_A_AT 200050_AT 200679_X_AT 200970_S_AT 201039_S_AT 201091_S_AT 201138_S_AT 201175_AT 201223_S_AT 201266_AT 201280_S_AT 201304_AT 201327_S_AT 201363_S_AT 201369_S_AT 201376_S_AT 201518_AT 201569_S_AT 201595_S_AT 201637_S_AT 201678_S_AT 201687_S_AT 201699_AT 201713_S_AT 201754_AT 201757_AT 201879_AT 201917_S_AT 2019…
HPA	placenta	HPA:0380000	false	6.10386e-11	10.2144	7517	442	368	11019	1553678_A_AT 1554078_S_AT 1554390_S_AT 1554868_S_AT 1559946_S_AT 1567214_A_AT 1569594_A_AT 200050_AT 200679_X_AT 201039_S_AT 201091_S_AT 201138_S_AT 201175_AT 201218_AT 201223_S_AT 201266_AT 201280_S_AT 201304_AT 201327_S_AT 201363_S_AT 201369_S_AT 201376_S_AT 201384_S_AT 201408_AT 201518_AT 201568_AT 201569_S_AT 201595_S_AT 201637_S_AT 201678_S_AT 201687_S_AT 201699_AT 201713_S_AT 201754_AT 2017…
HPA	pancreas; pancreatic endocrine cells[в‰ҐLow]	HPA:0351181	false	6.85301e-11	10.1641	5628	442	300	11019	1554078_S_AT 1554390_S_AT 1554868_S_AT 1559946_S_AT 1567214_A_AT 1569594_A_AT 200050_AT 200679_X_AT 200970_S_AT 201039_S_AT 201091_S_AT 201138_S_AT 201223_S_AT 201266_AT 201300_S_AT 201304_AT 201327_S_AT 201363_S_AT 201376_S_AT 201384_S_AT 201408_AT 201518_AT 201568_AT 201569_S_AT 201595_S_AT 201637_S_AT 201678_S_AT 201687_S_AT 201699_AT 201713_S_AT 201754_AT 201757_AT 201879_AT 201917_S_AT 20197…
HPA	colon	HPA:0130000	false	8.44306e-11	10.0735	8342	442	394	11019	1553678_A_AT 1554078_S_AT 1554390_S_AT 1554868_S_AT 1567214_A_AT 1569594_A_AT 200679_X_AT 200970_S_AT 201039_S_AT 201091_S_AT 201138_S_AT 201175_AT 201218_AT 201223_S_AT 201266_AT 201280_S_AT 201300_S_AT 201304_AT 201327_S_AT 201363_S_AT 201369_S_AT 201376_S_AT 201384_S_AT 201408_AT 201518_AT 201568_AT 201569_S_AT 201595_S_AT 201637_S_AT 201678_S_AT 201687_S_AT 201699_AT 201713_S_AT 201754_AT 201…
HPA	duodenum	HPA:0150000	false	9.52336e-11	10.0212	7899	442	380	11019	1554078_S_AT 1554390_S_AT 1554868_S_AT 1567214_A_AT 1569594_A_AT 200050_AT 200679_X_AT 200970_S_AT 201039_S_AT 201091_S_AT 201138_S_AT 201175_AT 201218_AT 201223_S_AT 201266_AT 201304_AT 201327_S_AT 201363_S_AT 201369_S_AT 201376_S_AT 201384_S_AT 201408_AT 201518_AT 201568_AT 201569_S_AT 201595_S_AT 201637_S_AT 201678_S_AT 201687_S_AT 201699_AT 201713_S_AT 201754_AT 201757_AT 201879_AT 201917_S_A…
HPA	skin 1	HPA:0460000	false	1.26406e-10	9.89823	7246	442	358	11019	1553678_A_AT 1554078_S_AT 1554390_S_AT 1554868_S_AT 1559078_AT 1559946_S_AT 1567214_A_AT 1569594_A_AT 200050_AT 200679_X_AT 200970_S_AT 201039_S_AT 201091_S_AT 201138_S_AT 201175_AT 201218_AT 201223_S_AT 201266_AT 201280_S_AT 201300_S_AT 201304_AT 201327_S_AT 201363_S_AT 201369_S_AT 201376_S_AT 201384_S_AT 201408_AT 201518_AT 201568_AT 201569_S_AT 201595_S_AT 201637_S_AT 201678_S_AT 201687_S_AT 2…
HPA	esophagus; squamous epithelial cells[в‰ҐLow]	HPA:0190221	false	1.4307e-10	9.84445	6679	442	338	11019	1554078_S_AT 1554390_S_AT 1554868_S_AT 1559078_AT 1567214_A_AT 1569594_A_AT 200050_AT 200679_X_AT 200970_S_AT 201039_S_AT 201091_S_AT 201138_S_AT 201175_AT 201218_AT 201223_S_AT 201266_AT 201280_S_AT 201304_AT 201327_S_AT 201363_S_AT 201369_S_AT 201376_S_AT 201408_AT 201518_AT 201568_AT 201569_S_AT 201595_S_AT 201637_S_AT 201678_S_AT 201687_S_AT 201699_AT 201713_S_AT 201754_AT 201757_AT 201879_AT…
HPA	esophagus	HPA:0190000	false	1.4307e-10	9.84445	6679	442	338	11019	1554078_S_AT 1554390_S_AT 1554868_S_AT 1559078_AT 1567214_A_AT 1569594_A_AT 200050_AT 200679_X_AT 200970_S_AT 201039_S_AT 201091_S_AT 201138_S_AT 201175_AT 201218_AT 201223_S_AT 201266_AT 201280_S_AT 201304_AT 201327_S_AT 201363_S_AT 201369_S_AT 201376_S_AT 201408_AT 201518_AT 201568_AT 201569_S_AT 201595_S_AT 201637_S_AT 201678_S_AT 201687_S_AT 201699_AT 201713_S_AT 201754_AT 201757_AT 201879_AT…
HPA	tonsil; squamous epithelial cells[в‰ҐLow]	HPA:0600221	false	1.46817e-10	9.83322	6652	442	337	11019	1554078_S_AT 1554390_S_AT 1554868_S_AT 1559078_AT 1567214_A_AT 1569594_A_AT 200050_AT 200679_X_AT 201039_S_AT 201091_S_AT 201138_S_AT 201175_AT 201218_AT 201223_S_AT 201266_AT 201280_S_AT 201304_AT 201327_S_AT 201363_S_AT 201369_S_AT 201376_S_AT 201384_S_AT 201518_AT 201568_AT 201569_S_AT 201595_S_AT 201637_S_AT 201678_S_AT 201687_S_AT 201699_AT 201713_S_AT 201754_AT 201757_AT 201879_AT 201917_S_…
HPA	small intestine; glandular cells[в‰ҐLow]	HPA:0480051	false	1.59135e-10	9.79823	7080	442	352	11019	1554078_S_AT 1554390_S_AT 1554868_S_AT 1559078_AT 1567214_A_AT 1569594_A_AT 200050_AT 200970_S_AT 201039_S_AT 201091_S_AT 201138_S_AT 201175_AT 201218_AT 201223_S_AT 201266_AT 201304_AT 201327_S_AT 201363_S_AT 201369_S_AT 201376_S_AT 201384_S_AT 201518_AT 201568_AT 201569_S_AT 201595_S_AT 201637_S_AT 201678_S_AT 201687_S_AT 201699_AT 201713_S_AT 201754_AT 201757_AT 201879_AT 201917_S_AT 201971_S_…
HPA	adrenal gland; glandular cells[в‰ҐLow]	HPA:0020051	false	2.35887e-10	9.6273	7415	442	363	11019	1554078_S_AT 1554390_S_AT 1554868_S_AT 1567214_A_AT 1569594_A_AT 200050_AT 200679_X_AT 200970_S_AT 201039_S_AT 201091_S_AT 201138_S_AT 201175_AT 201223_S_AT 201266_AT 201280_S_AT 201300_S_AT 201304_AT 201327_S_AT 201363_S_AT 201369_S_AT 201376_S_AT 201384_S_AT 201408_AT 201518_AT 201568_AT 201569_S_AT 201595_S_AT 201637_S_AT 201678_S_AT 201687_S_AT 201699_AT 201713_S_AT 201754_AT 201757_AT 201879…
HPA	adrenal gland	HPA:0020000	false	2.87562e-10	9.54127	7422	442	363	11019	1554078_S_AT 1554390_S_AT 1554868_S_AT 1567214_A_AT 1569594_A_AT 200050_AT 200679_X_AT 200970_S_AT 201039_S_AT 201091_S_AT 201138_S_AT 201175_AT 201223_S_AT 201266_AT 201280_S_AT 201300_S_AT 201304_AT 201327_S_AT 201363_S_AT 201369_S_AT 201376_S_AT 201384_S_AT 201408_AT 201518_AT 201568_AT 201569_S_AT 201595_S_AT 201637_S_AT 201678_S_AT 201687_S_AT 201699_AT 201713_S_AT 201754_AT 201757_AT 201879…
HPA	smooth muscle; smooth muscle cells[в‰ҐLow]	HPA:0490691	false	3.58474e-10	9.44554	5454	442	291	11019	1553678_A_AT 1554078_S_AT 1554390_S_AT 1554868_S_AT 1567214_A_AT 1569594_A_AT 200050_AT 200679_X_AT 200970_S_AT 201039_S_AT 201091_S_AT 201138_S_AT 201218_AT 201223_S_AT 201266_AT 201280_S_AT 201304_AT 201327_S_AT 201363_S_AT 201369_S_AT 201376_S_AT 201408_AT 201518_AT 201569_S_AT 201595_S_AT 201637_S_AT 201678_S_AT 201699_AT 201713_S_AT 201754_AT 201757_AT 201879_AT 201930_AT 201971_S_AT 202041_…
HPA	smooth muscle	HPA:0490000	false	3.58474e-10	9.44554	5454	442	291	11019	1553678_A_AT 1554078_S_AT 1554390_S_AT 1554868_S_AT 1567214_A_AT 1569594_A_AT 200050_AT 200679_X_AT 200970_S_AT 201039_S_AT 201091_S_AT 201138_S_AT 201218_AT 201223_S_AT 201266_AT 201280_S_AT 201304_AT 201327_S_AT 201363_S_AT 201369_S_AT 201376_S_AT 201408_AT 201518_AT 201569_S_AT 201595_S_AT 201637_S_AT 201678_S_AT 201699_AT 201713_S_AT 201754_AT 201757_AT 201879_AT 201930_AT 201971_S_AT 202041_…
HPA	endometrium 2	HPA:0170000	false	4.46519e-10	9.35016	6917	442	345	11019	1554078_S_AT 1554390_S_AT 1554868_S_AT 1559946_S_AT 1567214_A_AT 1569594_A_AT 200050_AT 200679_X_AT 201039_S_AT 201091_S_AT 201138_S_AT 201175_AT 201218_AT 201223_S_AT 201266_AT 201280_S_AT 201304_AT 201327_S_AT 201363_S_AT 201369_S_AT 201376_S_AT 201384_S_AT 201408_AT 201518_AT 201568_AT 201569_S_AT 201595_S_AT 201637_S_AT 201678_S_AT 201687_S_AT 201699_AT 201713_S_AT 201754_AT 201757_AT 201879_…
HPA	lymph node; non-germinal center cells[в‰ҐMedium]	HPA:0310442	false	4.76773e-10	9.32169	3989	442	231	11019	1554078_S_AT 1554390_S_AT 1554868_S_AT 1567214_A_AT 1569594_A_AT 200050_AT 200679_X_AT 201039_S_AT 201091_S_AT 201138_S_AT 201223_S_AT 201280_S_AT 201304_AT 201327_S_AT 201369_S_AT 201376_S_AT 201518_AT 201569_S_AT 201595_S_AT 201637_S_AT 201678_S_AT 201699_AT 201713_S_AT 201754_AT 201757_AT 201879_AT 201930_AT 201971_S_AT 202060_AT 202097_AT 202146_AT 202163_S_AT 202279_AT 202325_S_AT 202657_S_A…
HPA	endometrium 2; glandular cells[в‰ҐLow]	HPA:0170051	false	4.84085e-10	9.31508	6723	442	338	11019	1554078_S_AT 1554390_S_AT 1554868_S_AT 1559946_S_AT 1567214_A_AT 1569594_A_AT 200050_AT 200679_X_AT 201039_S_AT 201091_S_AT 201138_S_AT 201175_AT 201218_AT 201223_S_AT 201266_AT 201280_S_AT 201304_AT 201327_S_AT 201363_S_AT 201369_S_AT 201376_S_AT 201384_S_AT 201408_AT 201518_AT 201568_AT 201569_S_AT 201595_S_AT 201637_S_AT 201678_S_AT 201687_S_AT 201699_AT 201713_S_AT 201754_AT 201757_AT 201879_…
HPA	gallbladder; glandular cells[в‰ҐMedium]	HPA:0220052	false	5.29583e-10	9.27607	6615	442	334	11019	1554078_S_AT 1554390_S_AT 1554868_S_AT 1559946_S_AT 1569594_A_AT 200050_AT 200679_X_AT 201039_S_AT 201091_S_AT 201138_S_AT 201175_AT 201218_AT 201223_S_AT 201266_AT 201280_S_AT 201304_AT 201327_S_AT 201369_S_AT 201376_S_AT 201384_S_AT 201408_AT 201518_AT 201568_AT 201569_S_AT 201595_S_AT 201637_S_AT 201678_S_AT 201687_S_AT 201699_AT 201713_S_AT 201754_AT 201757_AT 201879_AT 201917_S_AT 201930_AT …
HPA	prostate	HPA:0390000	false	6.31873e-10	9.19937	6677	442	336	11019	1554078_S_AT 1554390_S_AT 1554868_S_AT 1567214_A_AT 1569594_A_AT 200050_AT 200679_X_AT 201039_S_AT 201091_S_AT 201138_S_AT 201175_AT 201218_AT 201223_S_AT 201266_AT 201280_S_AT 201304_AT 201327_S_AT 201363_S_AT 201369_S_AT 201376_S_AT 201384_S_AT 201408_AT 201518_AT 201568_AT 201569_S_AT 201595_S_AT 201637_S_AT 201678_S_AT 201687_S_AT 201699_AT 201713_S_AT 201754_AT 201757_AT 201879_AT 201917_S_A…
HPA	prostate; glandular cells[в‰ҐLow]	HPA:0390051	false	6.31873e-10	9.19937	6677	442	336	11019	1554078_S_AT 1554390_S_AT 1554868_S_AT 1567214_A_AT 1569594_A_AT 200050_AT 200679_X_AT 201039_S_AT 201091_S_AT 201138_S_AT 201175_AT 201218_AT 201223_S_AT 201266_AT 201280_S_AT 201304_AT 201327_S_AT 201363_S_AT 201369_S_AT 201376_S_AT 201384_S_AT 201408_AT 201518_AT 201568_AT 201569_S_AT 201595_S_AT 201637_S_AT 201678_S_AT 201687_S_AT 201699_AT 201713_S_AT 201754_AT 201757_AT 201879_AT 201917_S_A…
HPA	caudate	HPA:0080000	false	7.44689e-10	9.12802	6964	442	346	11019	1554078_S_AT 1554390_S_AT 1554868_S_AT 1559078_AT 1559946_S_AT 1567214_A_AT 1569594_A_AT 200050_AT 200679_X_AT 201039_S_AT 201091_S_AT 201138_S_AT 201175_AT 201223_S_AT 201266_AT 201280_S_AT 201300_S_AT 201304_AT 201327_S_AT 201363_S_AT 201376_S_AT 201384_S_AT 201518_AT 201568_AT 201569_S_AT 201595_S_AT 201637_S_AT 201678_S_AT 201687_S_AT 201699_AT 201713_S_AT 201754_AT 201757_AT 201879_AT 201917…
HPA	lung	HPA:0300000	false	1.01789e-09	8.9923	7379	442	360	11019	1554078_S_AT 1554390_S_AT 1554868_S_AT 1567214_A_AT 1569594_A_AT 200050_AT 200679_X_AT 200970_S_AT 201039_S_AT 201091_S_AT 201138_S_AT 201175_AT 201218_AT 201223_S_AT 201266_AT 201280_S_AT 201300_S_AT 201304_AT 201327_S_AT 201363_S_AT 201369_S_AT 201376_S_AT 201384_S_AT 201408_AT 201518_AT 201568_AT 201569_S_AT 201595_S_AT 201637_S_AT 201678_S_AT 201687_S_AT 201699_AT 201713_S_AT 201754_AT 201757…
HPA	tonsil; germinal center cells[в‰ҐMedium]	HPA:0600432	false	1.53662e-09	8.81343	4100	442	234	11019	1554078_S_AT 1554390_S_AT 1554868_S_AT 1567214_A_AT 1569594_A_AT 200050_AT 200679_X_AT 201039_S_AT 201091_S_AT 201138_S_AT 201223_S_AT 201266_AT 201304_AT 201327_S_AT 201363_S_AT 201369_S_AT 201376_S_AT 201518_AT 201569_S_AT 201595_S_AT 201637_S_AT 201678_S_AT 201699_AT 201713_S_AT 201754_AT 201757_AT 201930_AT 201971_S_AT 202060_AT 202097_AT 202138_X_AT 202279_AT 202298_AT 202325_S_AT 202657_S_A…
HPA	duodenum; glandular cells[в‰ҐLow]	HPA:0150051	false	1.68335e-09	8.77383	7108	442	350	11019	1554078_S_AT 1554390_S_AT 1554868_S_AT 1567214_A_AT 1569594_A_AT 200050_AT 200970_S_AT 201039_S_AT 201091_S_AT 201138_S_AT 201175_AT 201218_AT 201223_S_AT 201266_AT 201304_AT 201327_S_AT 201363_S_AT 201369_S_AT 201376_S_AT 201384_S_AT 201518_AT 201568_AT 201569_S_AT 201595_S_AT 201637_S_AT 201678_S_AT 201687_S_AT 201699_AT 201713_S_AT 201754_AT 201757_AT 201879_AT 201917_S_AT 201971_S_AT 202041_S…
HPA	tonsil; non-germinal center cells[в‰ҐMedium]	HPA:0600442	false	1.77056e-09	8.75189	4200	442	238	11019	1554078_S_AT 1554390_S_AT 1554868_S_AT 1559078_AT 1559946_S_AT 1567214_A_AT 1569594_A_AT 200050_AT 200679_X_AT 201138_S_AT 201223_S_AT 201304_AT 201369_S_AT 201376_S_AT 201518_AT 201569_S_AT 201595_S_AT 201637_S_AT 201678_S_AT 201699_AT 201713_S_AT 201754_AT 201879_AT 201930_AT 201971_S_AT 202060_AT 202097_AT 202138_X_AT 202146_AT 202163_S_AT 202279_AT 202325_S_AT 202425_X_AT 202657_S_AT 202673_A…
HPA	bone marrow; hematopoietic cells[в‰ҐLow]	HPA:0040081	false	1.84483e-09	8.73404	6496	442	328	11019	1554078_S_AT 1554390_S_AT 1554868_S_AT 1559078_AT 1559946_S_AT 1567214_A_AT 1569594_A_AT 200050_AT 200679_X_AT 200970_S_AT 201039_S_AT 201091_S_AT 201138_S_AT 201218_AT 201223_S_AT 201266_AT 201280_S_AT 201304_AT 201327_S_AT 201363_S_AT 201369_S_AT 201376_S_AT 201408_AT 201518_AT 201569_S_AT 201595_S_AT 201637_S_AT 201678_S_AT 201687_S_AT 201699_AT 201713_S_AT 201754_AT 201879_AT 201917_S_AT 2019…
HPA	bone marrow	HPA:0040000	false	1.84483e-09	8.73404	6496	442	328	11019	1554078_S_AT 1554390_S_AT 1554868_S_AT 1559078_AT 1559946_S_AT 1567214_A_AT 1569594_A_AT 200050_AT 200679_X_AT 200970_S_AT 201039_S_AT 201091_S_AT 201138_S_AT 201218_AT 201223_S_AT 201266_AT 201280_S_AT 201304_AT 201327_S_AT 201363_S_AT 201369_S_AT 201376_S_AT 201408_AT 201518_AT 201569_S_AT 201595_S_AT 201637_S_AT 201678_S_AT 201687_S_AT 201699_AT 201713_S_AT 201754_AT 201879_AT 201917_S_AT 2019…
HPA	hippocampus	HPA:0250000	false	1.92907e-09	8.71465	6830	442	340	11019	1554078_S_AT 1554390_S_AT 1554868_S_AT 1559078_AT 1567214_A_AT 1569594_A_AT 200050_AT 200679_X_AT 201039_S_AT 201091_S_AT 201138_S_AT 201175_AT 201223_S_AT 201266_AT 201280_S_AT 201300_S_AT 201304_AT 201327_S_AT 201363_S_AT 201376_S_AT 201384_S_AT 201518_AT 201568_AT 201569_S_AT 201595_S_AT 201637_S_AT 201678_S_AT 201687_S_AT 201699_AT 201713_S_AT 201754_AT 201757_AT 201879_AT 201971_S_AT 202041_…
HPA	skeletal muscle; myocytes[в‰ҐLow]	HPA:0440341	false	2.05061e-09	8.68812	5909	442	306	11019	1554078_S_AT 1554868_S_AT 1567214_A_AT 1569594_A_AT 200050_AT 200679_X_AT 200970_S_AT 201039_S_AT 201091_S_AT 201138_S_AT 201175_AT 201218_AT 201223_S_AT 201266_AT 201280_S_AT 201304_AT 201327_S_AT 201369_S_AT 201376_S_AT 201384_S_AT 201518_AT 201568_AT 201569_S_AT 201595_S_AT 201637_S_AT 201687_S_AT 201699_AT 201713_S_AT 201754_AT 201757_AT 201879_AT 201930_AT 201971_S_AT 202041_S_AT 202060_AT 2…
HPA	skeletal muscle	HPA:0440000	false	2.05061e-09	8.68812	5909	442	306	11019	1554078_S_AT 1554868_S_AT 1567214_A_AT 1569594_A_AT 200050_AT 200679_X_AT 200970_S_AT 201039_S_AT 201091_S_AT 201138_S_AT 201175_AT 201218_AT 201223_S_AT 201266_AT 201280_S_AT 201304_AT 201327_S_AT 201369_S_AT 201376_S_AT 201384_S_AT 201518_AT 201568_AT 201569_S_AT 201595_S_AT 201637_S_AT 201687_S_AT 201699_AT 201713_S_AT 201754_AT 201757_AT 201879_AT 201930_AT 201971_S_AT 202041_S_AT 202060_AT 2…
HPA	cerebellum; Purkinje cells[в‰ҐLow]	HPA:0090161	false	2.62477e-09	8.58091	5579	442	293	11019	1554078_S_AT 1554390_S_AT 1554868_S_AT 1559078_AT 1567214_A_AT 1569594_A_AT 200050_AT 200970_S_AT 201039_S_AT 201138_S_AT 201175_AT 201223_S_AT 201266_AT 201280_S_AT 201304_AT 201327_S_AT 201363_S_AT 201376_S_AT 201384_S_AT 201408_AT 201518_AT 201568_AT 201569_S_AT 201595_S_AT 201637_S_AT 201699_AT 201713_S_AT 201754_AT 201879_AT 201971_S_AT 202041_S_AT 202060_AT 202097_AT 202138_X_AT 202146_AT 2…
HPA	vagina; squamous epithelial cells[в‰ҐLow]	HPA:0620221	false	2.7947e-09	8.55367	6000	442	309	11019	1554078_S_AT 1554390_S_AT 1554868_S_AT 1559078_AT 1567214_A_AT 1569594_A_AT 200050_AT 200679_X_AT 200970_S_AT 201039_S_AT 201091_S_AT 201138_S_AT 201175_AT 201218_AT 201223_S_AT 201266_AT 201280_S_AT 201304_AT 201327_S_AT 201376_S_AT 201408_AT 201518_AT 201568_AT 201569_S_AT 201595_S_AT 201637_S_AT 201678_S_AT 201687_S_AT 201699_AT 201713_S_AT 201754_AT 201757_AT 201879_AT 201930_AT 201971_S_AT 2…
HPA	vagina	HPA:0620000	false	2.7947e-09	8.55367	6000	442	309	11019	1554078_S_AT 1554390_S_AT 1554868_S_AT 1559078_AT 1567214_A_AT 1569594_A_AT 200050_AT 200679_X_AT 200970_S_AT 201039_S_AT 201091_S_AT 201138_S_AT 201175_AT 201218_AT 201223_S_AT 201266_AT 201280_S_AT 201304_AT 201327_S_AT 201376_S_AT 201408_AT 201518_AT 201568_AT 201569_S_AT 201595_S_AT 201637_S_AT 201678_S_AT 201687_S_AT 201699_AT 201713_S_AT 201754_AT 201757_AT 201879_AT 201930_AT 201971_S_AT 2…
HPA	stomach 2; glandular cells[в‰ҐMedium]	HPA:0550052	false	4.3427e-09	8.36224	6284	442	319	11019	1554078_S_AT 1554390_S_AT 1554868_S_AT 1567214_A_AT 1569594_A_AT 200050_AT 200679_X_AT 200970_S_AT 201039_S_AT 201091_S_AT 201138_S_AT 201175_AT 201218_AT 201223_S_AT 201266_AT 201304_AT 201327_S_AT 201363_S_AT 201369_S_AT 201376_S_AT 201384_S_AT 201408_AT 201518_AT 201568_AT 201569_S_AT 201595_S_AT 201637_S_AT 201678_S_AT 201687_S_AT 201699_AT 201713_S_AT 201754_AT 201757_AT 201879_AT 201917_S_A…
HPA	salivary gland; glandular cells[в‰ҐLow]	HPA:0420051	false	6.17801e-09	8.20915	6902	442	341	11019	1554078_S_AT 1554868_S_AT 1559078_AT 1567214_A_AT 1569594_A_AT 200050_AT 200679_X_AT 200970_S_AT 201039_S_AT 201091_S_AT 201138_S_AT 201175_AT 201218_AT 201223_S_AT 201266_AT 201280_S_AT 201300_S_AT 201304_AT 201327_S_AT 201363_S_AT 201369_S_AT 201376_S_AT 201384_S_AT 201408_AT 201518_AT 201568_AT 201569_S_AT 201595_S_AT 201637_S_AT 201678_S_AT 201699_AT 201713_S_AT 201754_AT 201757_AT 201879_AT …
HPA	salivary gland	HPA:0420000	false	6.17801e-09	8.20915	6902	442	341	11019	1554078_S_AT 1554868_S_AT 1559078_AT 1567214_A_AT 1569594_A_AT 200050_AT 200679_X_AT 200970_S_AT 201039_S_AT 201091_S_AT 201138_S_AT 201175_AT 201218_AT 201223_S_AT 201266_AT 201280_S_AT 201300_S_AT 201304_AT 201327_S_AT 201363_S_AT 201369_S_AT 201376_S_AT 201384_S_AT 201408_AT 201518_AT 201568_AT 201569_S_AT 201595_S_AT 201637_S_AT 201678_S_AT 201699_AT 201713_S_AT 201754_AT 201757_AT 201879_AT …
HPA	liver	HPA:0290000	false	6.25325e-09	8.20389	6298	442	319	11019	1554078_S_AT 1554390_S_AT 1554868_S_AT 1567214_A_AT 1569594_A_AT 200050_AT 200679_X_AT 200970_S_AT 201039_S_AT 201091_S_AT 201138_S_AT 201175_AT 201223_S_AT 201266_AT 201280_S_AT 201304_AT 201327_S_AT 201376_S_AT 201384_S_AT 201408_AT 201518_AT 201568_AT 201569_S_AT 201595_S_AT 201637_S_AT 201678_S_AT 201687_S_AT 201699_AT 201713_S_AT 201754_AT 201757_AT 201879_AT 201917_S_AT 202041_S_AT 202097_A…
HPA	cerebral cortex; neuronal cells[в‰ҐMedium]	HPA:0100132	false	1.0203e-08	7.99127	4996	442	268	11019	1554078_S_AT 1554390_S_AT 1554868_S_AT 1559078_AT 1567214_A_AT 1569594_A_AT 200050_AT 201039_S_AT 201138_S_AT 201175_AT 201223_S_AT 201266_AT 201304_AT 201327_S_AT 201363_S_AT 201376_S_AT 201408_AT 201518_AT 201568_AT 201569_S_AT 201595_S_AT 201637_S_AT 201699_AT 201713_S_AT 201754_AT 201757_AT 201879_AT 201971_S_AT 202041_S_AT 202060_AT 202097_AT 202138_X_AT 202146_AT 202233_S_AT 202279_AT 20229…
HPA	skin 2	HPA:0470000	false	1.08014e-08	7.96652	7036	442	345	11019	1553678_A_AT 1554078_S_AT 1554390_S_AT 1554868_S_AT 1559078_AT 1559946_S_AT 1567214_A_AT 1569594_A_AT 200050_AT 200679_X_AT 200970_S_AT 201039_S_AT 201091_S_AT 201138_S_AT 201175_AT 201223_S_AT 201266_AT 201280_S_AT 201300_S_AT 201304_AT 201327_S_AT 201363_S_AT 201376_S_AT 201384_S_AT 201408_AT 201518_AT 201568_AT 201569_S_AT 201595_S_AT 201637_S_AT 201678_S_AT 201687_S_AT 201699_AT 201713_S_AT 2…
HPA	cervix; squamous epithelial cells[в‰ҐLow]	HPA:0630221	false	1.29354e-08	7.88822	5460	442	286	11019	1554078_S_AT 1554390_S_AT 1554868_S_AT 1559078_AT 1559946_S_AT 1569594_A_AT 200050_AT 200679_X_AT 200970_S_AT 201039_S_AT 201138_S_AT 201175_AT 201218_AT 201223_S_AT 201266_AT 201280_S_AT 201304_AT 201327_S_AT 201363_S_AT 201369_S_AT 201376_S_AT 201384_S_AT 201408_AT 201518_AT 201569_S_AT 201595_S_AT 201637_S_AT 201678_S_AT 201687_S_AT 201699_AT 201713_S_AT 201754_AT 201757_AT 201930_AT 202060_AT…
HPA	cerebral cortex; neuronal cells[в‰ҐLow]	HPA:0100131	false	1.43533e-08	7.84305	6712	442	333	11019	1554078_S_AT 1554390_S_AT 1554868_S_AT 1559078_AT 1567214_A_AT 1569594_A_AT 200050_AT 200679_X_AT 201039_S_AT 201091_S_AT 201138_S_AT 201175_AT 201223_S_AT 201266_AT 201280_S_AT 201304_AT 201327_S_AT 201363_S_AT 201376_S_AT 201408_AT 201518_AT 201568_AT 201569_S_AT 201595_S_AT 201637_S_AT 201678_S_AT 201699_AT 201713_S_AT 201754_AT 201757_AT 201879_AT 201971_S_AT 202041_S_AT 202060_AT 202097_AT 2…
HPA	bronchus; respiratory epithelial cells[High]	HPA:0060103	false	1.43965e-08	7.84174	1845	442	128	11019	1554078_S_AT 1554868_S_AT 1567214_A_AT 1569594_A_AT 200050_AT 200679_X_AT 201039_S_AT 201138_S_AT 201223_S_AT 201327_S_AT 201376_S_AT 201518_AT 201568_AT 201595_S_AT 201637_S_AT 201678_S_AT 201713_S_AT 201754_AT 201971_S_AT 202060_AT 202097_AT 202163_S_AT 202279_AT 202325_S_AT 202657_S_AT 202770_S_AT 202918_S_AT 203087_S_AT 203250_AT 203781_AT 203944_X_AT 204484_AT 205133_S_AT 205644_S_AT 205849_…
HPA	heart muscle; cardiomyocytes[в‰ҐLow]	HPA:0241101	false	1.49883e-08	7.82425	6332	442	319	11019	1554078_S_AT 1554868_S_AT 1567214_A_AT 1569594_A_AT 200050_AT 200679_X_AT 200970_S_AT 201039_S_AT 201091_S_AT 201138_S_AT 201175_AT 201218_AT 201223_S_AT 201266_AT 201304_AT 201327_S_AT 201363_S_AT 201369_S_AT 201384_S_AT 201408_AT 201518_AT 201568_AT 201569_S_AT 201595_S_AT 201637_S_AT 201687_S_AT 201699_AT 201713_S_AT 201754_AT 201757_AT 201879_AT 201917_S_AT 201930_AT 201971_S_AT 202041_S_AT 2…
HPA	heart muscle	HPA:0240000	false	1.49883e-08	7.82425	6332	442	319	11019	1554078_S_AT 1554868_S_AT 1567214_A_AT 1569594_A_AT 200050_AT 200679_X_AT 200970_S_AT 201039_S_AT 201091_S_AT 201138_S_AT 201175_AT 201218_AT 201223_S_AT 201266_AT 201304_AT 201327_S_AT 201363_S_AT 201369_S_AT 201384_S_AT 201408_AT 201518_AT 201568_AT 201569_S_AT 201595_S_AT 201637_S_AT 201687_S_AT 201699_AT 201713_S_AT 201754_AT 201757_AT 201879_AT 201917_S_AT 201930_AT 201971_S_AT 202041_S_AT 2…
HPA	hippocampus; neuronal cells[в‰ҐLow]	HPA:0250131	false	1.63428e-08	7.78667	6228	442	315	11019	1554078_S_AT 1554390_S_AT 1554868_S_AT 1559078_AT 1567214_A_AT 1569594_A_AT 200050_AT 200679_X_AT 201039_S_AT 201091_S_AT 201138_S_AT 201175_AT 201223_S_AT 201266_AT 201300_S_AT 201304_AT 201327_S_AT 201363_S_AT 201376_S_AT 201384_S_AT 201518_AT 201568_AT 201569_S_AT 201595_S_AT 201637_S_AT 201678_S_AT 201699_AT 201713_S_AT 201754_AT 201757_AT 201879_AT 201971_S_AT 202041_S_AT 202060_AT 202097_AT…
HPA	colon; glandular cells[в‰ҐLow]	HPA:0130051	false	1.7815e-08	7.74921	6999	442	343	11019	1553678_A_AT 1554078_S_AT 1554390_S_AT 1554868_S_AT 1569594_A_AT 200970_S_AT 201039_S_AT 201091_S_AT 201138_S_AT 201175_AT 201218_AT 201223_S_AT 201266_AT 201304_AT 201327_S_AT 201363_S_AT 201369_S_AT 201376_S_AT 201384_S_AT 201518_AT 201568_AT 201569_S_AT 201595_S_AT 201637_S_AT 201678_S_AT 201687_S_AT 201699_AT 201713_S_AT 201754_AT 201757_AT 201879_AT 201917_S_AT 201971_S_AT 202041_S_AT 202060…
HPA	breast; myoepithelial cells[в‰ҐLow]	HPA:0050091	false	2.49915e-08	7.60221	5666	442	293	11019	1553678_A_AT 1554078_S_AT 1554390_S_AT 1554868_S_AT 1567214_A_AT 1569594_A_AT 200050_AT 200679_X_AT 200970_S_AT 201039_S_AT 201091_S_AT 201138_S_AT 201218_AT 201223_S_AT 201266_AT 201280_S_AT 201304_AT 201327_S_AT 201363_S_AT 201369_S_AT 201376_S_AT 201384_S_AT 201408_AT 201518_AT 201568_AT 201569_S_AT 201595_S_AT 201637_S_AT 201678_S_AT 201699_AT 201713_S_AT 201754_AT 201757_AT 201879_AT 201971_…
HPA	spleen; cells in red pulp[в‰ҐLow]	HPA:0530711	false	2.51466e-08	7.59952	5333	442	280	11019	1554078_S_AT 1554390_S_AT 1554868_S_AT 1559078_AT 1567214_A_AT 1569594_A_AT 200050_AT 200679_X_AT 200970_S_AT 201039_S_AT 201091_S_AT 201138_S_AT 201223_S_AT 201266_AT 201280_S_AT 201304_AT 201363_S_AT 201369_S_AT 201376_S_AT 201518_AT 201569_S_AT 201595_S_AT 201678_S_AT 201699_AT 201713_S_AT 201754_AT 201757_AT 201879_AT 201917_S_AT 201930_AT 201971_S_AT 202060_AT 202097_AT 202138_X_AT 202163_S_…
HPA	gallbladder; glandular cells[High]	HPA:0220053	false	2.67379e-08	7.57287	2874	442	176	11019	1554078_S_AT 1554868_S_AT 200050_AT 200679_X_AT 201039_S_AT 201138_S_AT 201218_AT 201223_S_AT 201266_AT 201304_AT 201327_S_AT 201376_S_AT 201408_AT 201518_AT 201568_AT 201569_S_AT 201637_S_AT 201687_S_AT 201713_S_AT 201754_AT 201757_AT 201971_S_AT 202097_AT 202163_S_AT 202233_S_AT 202279_AT 202298_AT 202325_S_AT 202428_X_AT 202657_S_AT 202673_AT 202888_S_AT 202918_S_AT 203250_AT 203310_AT 203371_…
HPA	lymph node; germinal center cells[в‰ҐLow]	HPA:0310431	false	2.87524e-08	7.54133	5061	442	269	11019	1554078_S_AT 1554390_S_AT 1567214_A_AT 1569594_A_AT 200050_AT 200679_X_AT 201039_S_AT 201091_S_AT 201138_S_AT 201175_AT 201223_S_AT 201266_AT 201304_AT 201363_S_AT 201369_S_AT 201376_S_AT 201408_AT 201518_AT 201568_AT 201569_S_AT 201595_S_AT 201637_S_AT 201678_S_AT 201687_S_AT 201699_AT 201713_S_AT 201754_AT 201757_AT 201879_AT 201930_AT 201971_S_AT 202060_AT 202097_AT 202138_X_AT 202146_AT 20223…
HPA	bronchus	HPA:0060000	false	3.8335e-08	7.4164	7428	442	357	11019	1554078_S_AT 1554390_S_AT 1554868_S_AT 1559078_AT 1559946_S_AT 1567214_A_AT 1569594_A_AT 200050_AT 200679_X_AT 201039_S_AT 201091_S_AT 201138_S_AT 201175_AT 201223_S_AT 201266_AT 201304_AT 201327_S_AT 201363_S_AT 201369_S_AT 201376_S_AT 201384_S_AT 201408_AT 201518_AT 201568_AT 201569_S_AT 201595_S_AT 201637_S_AT 201678_S_AT 201687_S_AT 201699_AT 201713_S_AT 201754_AT 201757_AT 201879_AT 201917_S…
HPA	breast; glandular cells[в‰ҐMedium]	HPA:0050052	false	5.14752e-08	7.2884	5109	442	270	11019	1554078_S_AT 1554390_S_AT 1554868_S_AT 1567214_A_AT 1569594_A_AT 200050_AT 200679_X_AT 200970_S_AT 201039_S_AT 201091_S_AT 201138_S_AT 201175_AT 201218_AT 201223_S_AT 201304_AT 201327_S_AT 201363_S_AT 201376_S_AT 201384_S_AT 201408_AT 201518_AT 201568_AT 201569_S_AT 201595_S_AT 201637_S_AT 201678_S_AT 201713_S_AT 201754_AT 201757_AT 201879_AT 201930_AT 201971_S_AT 202060_AT 202097_AT 202146_AT 20…
HPA	lymph node; germinal center cells[в‰ҐMedium]	HPA:0310432	false	5.83887e-08	7.23367	3302	442	194	11019	1554078_S_AT 1554390_S_AT 1567214_A_AT 1569594_A_AT 200050_AT 200679_X_AT 201039_S_AT 201091_S_AT 201138_S_AT 201175_AT 201223_S_AT 201266_AT 201304_AT 201369_S_AT 201376_S_AT 201518_AT 201569_S_AT 201595_S_AT 201637_S_AT 201678_S_AT 201699_AT 201713_S_AT 201754_AT 201757_AT 201930_AT 201971_S_AT 202060_AT 202097_AT 202279_AT 202325_S_AT 202428_X_AT 202657_S_AT 202719_S_AT 202770_S_AT 202798_AT 2…
HPA	seminal vesicle	HPA:0430000	false	6.64249e-08	7.17767	6828	442	335	11019	1553678_A_AT 1554078_S_AT 1554390_S_AT 1554868_S_AT 1559078_AT 1567214_A_AT 1569594_A_AT 200050_AT 200679_X_AT 200970_S_AT 201039_S_AT 201091_S_AT 201138_S_AT 201175_AT 201223_S_AT 201266_AT 201304_AT 201327_S_AT 201363_S_AT 201369_S_AT 201376_S_AT 201384_S_AT 201408_AT 201518_AT 201568_AT 201569_S_AT 201595_S_AT 201637_S_AT 201678_S_AT 201687_S_AT 201699_AT 201713_S_AT 201754_AT 201757_AT 201879…
HPA	seminal vesicle; glandular cells[в‰ҐLow]	HPA:0430051	false	6.64249e-08	7.17767	6828	442	335	11019	1553678_A_AT 1554078_S_AT 1554390_S_AT 1554868_S_AT 1559078_AT 1567214_A_AT 1569594_A_AT 200050_AT 200679_X_AT 200970_S_AT 201039_S_AT 201091_S_AT 201138_S_AT 201175_AT 201223_S_AT 201266_AT 201304_AT 201327_S_AT 201363_S_AT 201369_S_AT 201376_S_AT 201384_S_AT 201408_AT 201518_AT 201568_AT 201569_S_AT 201595_S_AT 201637_S_AT 201678_S_AT 201687_S_AT 201699_AT 201713_S_AT 201754_AT 201757_AT 201879…
HPA	nasopharynx	HPA:0320000	false	7.34266e-08	7.13415	7196	442	348	11019	1554078_S_AT 1554390_S_AT 1554868_S_AT 1559946_S_AT 1567214_A_AT 1569594_A_AT 200679_X_AT 200970_S_AT 201039_S_AT 201091_S_AT 201138_S_AT 201175_AT 201218_AT 201223_S_AT 201266_AT 201280_S_AT 201304_AT 201327_S_AT 201363_S_AT 201369_S_AT 201376_S_AT 201384_S_AT 201408_AT 201518_AT 201568_AT 201569_S_AT 201595_S_AT 201637_S_AT 201678_S_AT 201687_S_AT 201699_AT 201713_S_AT 201754_AT 201757_AT 20187…
HPA	kidney; cells in tubules[в‰ҐLow]	HPA:0270361	false	7.35869e-08	7.1332	7027	442	342	11019	1554078_S_AT 1554390_S_AT 1554868_S_AT 1559078_AT 1559946_S_AT 1567214_A_AT 1569594_A_AT 200679_X_AT 200970_S_AT 201039_S_AT 201091_S_AT 201138_S_AT 201175_AT 201218_AT 201223_S_AT 201266_AT 201327_S_AT 201363_S_AT 201369_S_AT 201376_S_AT 201384_S_AT 201408_AT 201518_AT 201568_AT 201569_S_AT 201595_S_AT 201637_S_AT 201687_S_AT 201699_AT 201713_S_AT 201879_AT 201917_S_AT 201971_S_AT 202041_S_AT 20…
HPA	spleen; cells in white pulp[в‰ҐLow]	HPA:0530721	false	7.65037e-08	7.11632	4339	442	238	11019	1554078_S_AT 1554390_S_AT 1554868_S_AT 1559946_S_AT 1567214_A_AT 1569594_A_AT 200679_X_AT 201039_S_AT 201138_S_AT 201223_S_AT 201266_AT 201280_S_AT 201304_AT 201327_S_AT 201369_S_AT 201376_S_AT 201518_AT 201569_S_AT 201595_S_AT 201678_S_AT 201699_AT 201713_S_AT 201754_AT 201757_AT 201930_AT 201971_S_AT 202060_AT 202097_AT 202138_X_AT 202146_AT 202163_S_AT 202209_AT 202233_S_AT 202279_AT 202298_AT…
HPA	lung; macrophages[в‰ҐLow]	HPA:0300411	false	9.44137e-08	7.02496	6787	442	333	11019	1554078_S_AT 1554390_S_AT 1554868_S_AT 1567214_A_AT 1569594_A_AT 200050_AT 200679_X_AT 200970_S_AT 201039_S_AT 201091_S_AT 201138_S_AT 201175_AT 201223_S_AT 201266_AT 201280_S_AT 201300_S_AT 201304_AT 201327_S_AT 201363_S_AT 201369_S_AT 201376_S_AT 201384_S_AT 201408_AT 201518_AT 201568_AT 201569_S_AT 201595_S_AT 201637_S_AT 201678_S_AT 201699_AT 201713_S_AT 201754_AT 201757_AT 201879_AT 201917_S…
HPA	small intestine; glandular cells[в‰ҐMedium]	HPA:0480052	false	1.1406e-07	6.94286	6067	442	306	11019	1554078_S_AT 1554390_S_AT 1554868_S_AT 1567214_A_AT 1569594_A_AT 200050_AT 200970_S_AT 201039_S_AT 201091_S_AT 201138_S_AT 201175_AT 201218_AT 201223_S_AT 201266_AT 201304_AT 201327_S_AT 201363_S_AT 201369_S_AT 201376_S_AT 201384_S_AT 201518_AT 201568_AT 201569_S_AT 201595_S_AT 201637_S_AT 201678_S_AT 201687_S_AT 201699_AT 201713_S_AT 201754_AT 201757_AT 201879_AT 201917_S_AT 201971_S_AT 202060_A…
HPA	adrenal gland; glandular cells[в‰ҐMedium]	HPA:0020052	false	1.24784e-07	6.90384	6018	442	304	11019	1554078_S_AT 1554390_S_AT 1554868_S_AT 1567214_A_AT 1569594_A_AT 200050_AT 200679_X_AT 201039_S_AT 201091_S_AT 201138_S_AT 201175_AT 201223_S_AT 201266_AT 201280_S_AT 201304_AT 201327_S_AT 201363_S_AT 201369_S_AT 201376_S_AT 201384_S_AT 201518_AT 201568_AT 201569_S_AT 201595_S_AT 201637_S_AT 201678_S_AT 201687_S_AT 201699_AT 201713_S_AT 201754_AT 201757_AT 201879_AT 201930_AT 201971_S_AT 202041_S…
HPA	thyroid gland; glandular cells[в‰ҐMedium]	HPA:0590052	false	1.2528e-07	6.90212	5602	442	288	11019	1554078_S_AT 1554390_S_AT 1554868_S_AT 1567214_A_AT 1569594_A_AT 200050_AT 200679_X_AT 200970_S_AT 201039_S_AT 201091_S_AT 201138_S_AT 201218_AT 201223_S_AT 201266_AT 201280_S_AT 201304_AT 201327_S_AT 201363_S_AT 201369_S_AT 201376_S_AT 201384_S_AT 201408_AT 201518_AT 201568_AT 201569_S_AT 201595_S_AT 201637_S_AT 201678_S_AT 201699_AT 201713_S_AT 201754_AT 201757_AT 201879_AT 201971_S_AT 202041_S…
HPA	breast; myoepithelial cells[в‰ҐMedium]	HPA:0050092	false	1.7598e-07	6.75454	3779	442	213	11019	1554078_S_AT 1554390_S_AT 1554868_S_AT 1567214_A_AT 1569594_A_AT 200050_AT 200679_X_AT 201039_S_AT 201091_S_AT 201138_S_AT 201223_S_AT 201304_AT 201327_S_AT 201363_S_AT 201369_S_AT 201376_S_AT 201384_S_AT 201408_AT 201518_AT 201568_AT 201595_S_AT 201637_S_AT 201678_S_AT 201713_S_AT 201754_AT 201757_AT 201879_AT 201971_S_AT 202060_AT 202097_AT 202146_AT 202163_S_AT 202233_S_AT 202279_AT 202298_AT …
HPA	appendix; lymphoid tissue[в‰ҐMedium]	HPA:0030072	false	2.03585e-07	6.69125	2987	442	178	11019	1554078_S_AT 1554390_S_AT 1554868_S_AT 1559078_AT 1567214_A_AT 1569594_A_AT 200050_AT 201091_S_AT 201138_S_AT 201223_S_AT 201266_AT 201304_AT 201327_S_AT 201363_S_AT 201369_S_AT 201376_S_AT 201518_AT 201569_S_AT 201595_S_AT 201637_S_AT 201678_S_AT 201687_S_AT 201699_AT 201713_S_AT 201754_AT 201971_S_AT 202060_AT 202097_AT 202138_X_AT 202279_AT 202325_S_AT 202673_AT 202724_S_AT 202770_S_AT 202798_…
HPA	ovary	HPA:0340000	false	2.69344e-07	6.56969	5429	442	280	11019	1553678_A_AT 1554078_S_AT 1554868_S_AT 1567214_A_AT 1569594_A_AT 200050_AT 200679_X_AT 200970_S_AT 201039_S_AT 201091_S_AT 201138_S_AT 201223_S_AT 201266_AT 201280_S_AT 201304_AT 201363_S_AT 201376_S_AT 201384_S_AT 201408_AT 201518_AT 201568_AT 201569_S_AT 201595_S_AT 201637_S_AT 201678_S_AT 201687_S_AT 201699_AT 201713_S_AT 201754_AT 201757_AT 201879_AT 201917_S_AT 201971_S_AT 202060_AT 202097_A…
HPA	adrenal gland; glandular cells[High]	HPA:0020053	false	3.31852e-07	6.47906	2287	442	145	11019	1554078_S_AT 1554868_S_AT 1567214_A_AT 200050_AT 201039_S_AT 201138_S_AT 201223_S_AT 201266_AT 201304_AT 201327_S_AT 201376_S_AT 201384_S_AT 201568_AT 201569_S_AT 201637_S_AT 201699_AT 201713_S_AT 201754_AT 201757_AT 201971_S_AT 202097_AT 202163_S_AT 202233_S_AT 202279_AT 202298_AT 202325_S_AT 202673_AT 202770_S_AT 202918_S_AT 203087_S_AT 203250_AT 203497_AT 203667_AT 203831_AT 204132_S_AT 205133…
HPA	urinary bladder; urothelial cells[в‰ҐMedium]	HPA:0610832	false	3.66117e-07	6.43638	5958	442	300	11019	1554078_S_AT 1554390_S_AT 1554868_S_AT 1559078_AT 1559946_S_AT 1567214_A_AT 1569594_A_AT 200050_AT 200679_X_AT 201039_S_AT 201091_S_AT 201138_S_AT 201223_S_AT 201266_AT 201304_AT 201327_S_AT 201369_S_AT 201376_S_AT 201384_S_AT 201408_AT 201518_AT 201568_AT 201569_S_AT 201595_S_AT 201637_S_AT 201678_S_AT 201687_S_AT 201699_AT 201713_S_AT 201754_AT 201757_AT 201879_AT 201930_AT 201971_S_AT 202060_A…
HPA	tonsil; squamous epithelial cells[в‰ҐMedium]	HPA:0600222	false	4.63456e-07	6.33399	4949	442	260	11019	1554078_S_AT 1554390_S_AT 1554868_S_AT 1559078_AT 1567214_A_AT 1569594_A_AT 200050_AT 200679_X_AT 201039_S_AT 201091_S_AT 201138_S_AT 201175_AT 201223_S_AT 201266_AT 201280_S_AT 201304_AT 201327_S_AT 201363_S_AT 201369_S_AT 201376_S_AT 201518_AT 201568_AT 201569_S_AT 201595_S_AT 201637_S_AT 201678_S_AT 201687_S_AT 201699_AT 201713_S_AT 201754_AT 201757_AT 201930_AT 201971_S_AT 202041_S_AT 202060_…
HPA	testis	HPA:0570000	false	4.84713e-07	6.31451	9036	442	406	11019	1554078_S_AT 1554390_S_AT 1554868_S_AT 1559946_S_AT 1567214_A_AT 1569594_A_AT 200050_AT 200679_X_AT 200970_S_AT 201039_S_AT 201091_S_AT 201138_S_AT 201175_AT 201218_AT 201223_S_AT 201266_AT 201280_S_AT 201304_AT 201327_S_AT 201363_S_AT 201369_S_AT 201376_S_AT 201384_S_AT 201408_AT 201518_AT 201568_AT 201569_S_AT 201595_S_AT 201637_S_AT 201678_S_AT 201687_S_AT 201699_AT 201713_S_AT 201754_AT 20175…
HPA	appendix; glandular cells[в‰ҐMedium]	HPA:0030052	false	5.23908e-07	6.28075	5508	442	282	11019	1554078_S_AT 1554390_S_AT 1554868_S_AT 1567214_A_AT 1569594_A_AT 200050_AT 201091_S_AT 201138_S_AT 201175_AT 201218_AT 201223_S_AT 201266_AT 201304_AT 201327_S_AT 201363_S_AT 201369_S_AT 201376_S_AT 201384_S_AT 201518_AT 201568_AT 201569_S_AT 201595_S_AT 201637_S_AT 201678_S_AT 201687_S_AT 201699_AT 201713_S_AT 201754_AT 201757_AT 201879_AT 201917_S_AT 201971_S_AT 202060_AT 202097_AT 202138_X_AT …
HPA	rectum; glandular cells[в‰ҐMedium]	HPA:0400052	false	5.5518e-07	6.25557	6107	442	305	11019	1554078_S_AT 1554390_S_AT 1554868_S_AT 1567214_A_AT 1569594_A_AT 200050_AT 200970_S_AT 201039_S_AT 201091_S_AT 201138_S_AT 201218_AT 201223_S_AT 201266_AT 201304_AT 201327_S_AT 201363_S_AT 201369_S_AT 201376_S_AT 201384_S_AT 201518_AT 201568_AT 201569_S_AT 201595_S_AT 201637_S_AT 201678_S_AT 201687_S_AT 201699_AT 201713_S_AT 201754_AT 201757_AT 201879_AT 201917_S_AT 201971_S_AT 202060_AT 202097_A…
HPA	caudate; neuronal cells[в‰ҐLow]	HPA:0080131	false	5.98595e-07	6.22287	6163	442	307	11019	1554078_S_AT 1554868_S_AT 1559078_AT 1559946_S_AT 1567214_A_AT 200050_AT 201039_S_AT 201138_S_AT 201175_AT 201223_S_AT 201266_AT 201300_S_AT 201304_AT 201327_S_AT 201363_S_AT 201376_S_AT 201384_S_AT 201518_AT 201568_AT 201569_S_AT 201595_S_AT 201637_S_AT 201678_S_AT 201699_AT 201713_S_AT 201754_AT 201757_AT 201879_AT 201917_S_AT 201930_AT 201971_S_AT 202041_S_AT 202060_AT 202097_AT 202138_X_AT 20…
HPA	bone marrow; hematopoietic cells[в‰ҐMedium]	HPA:0040082	false	6.5201e-07	6.18575	4256	442	231	11019	1554078_S_AT 1554390_S_AT 1554868_S_AT 1567214_A_AT 1569594_A_AT 200050_AT 200679_X_AT 201039_S_AT 201266_AT 201280_S_AT 201327_S_AT 201363_S_AT 201369_S_AT 201376_S_AT 201518_AT 201569_S_AT 201595_S_AT 201637_S_AT 201678_S_AT 201699_AT 201713_S_AT 201754_AT 201879_AT 201930_AT 201971_S_AT 202060_AT 202097_AT 202138_X_AT 202279_AT 202325_S_AT 202657_S_AT 202673_AT 202770_S_AT 202798_AT 203076_S_A…
HPA	placenta; trophoblastic cells[в‰ҐLow]	HPA:0380521	false	7.74715e-07	6.11086	6360	442	314	11019	1554078_S_AT 1554390_S_AT 1567214_A_AT 1569594_A_AT 200050_AT 200679_X_AT 201039_S_AT 201138_S_AT 201175_AT 201218_AT 201223_S_AT 201266_AT 201304_AT 201327_S_AT 201363_S_AT 201376_S_AT 201384_S_AT 201408_AT 201568_AT 201569_S_AT 201595_S_AT 201637_S_AT 201687_S_AT 201699_AT 201754_AT 201757_AT 201879_AT 201917_S_AT 201971_S_AT 202041_S_AT 202060_AT 202097_AT 202138_X_AT 202146_AT 202163_S_AT 202…
HPA	nasopharynx; respiratory epithelial cells[High]	HPA:0320103	false	8.83078e-07	6.054	1798	442	120	11019	1554868_S_AT 1567214_A_AT 200679_X_AT 201039_S_AT 201138_S_AT 201223_S_AT 201304_AT 201327_S_AT 201376_S_AT 201518_AT 201637_S_AT 201678_S_AT 201687_S_AT 201713_S_AT 201757_AT 201971_S_AT 202097_AT 202163_S_AT 202279_AT 202325_S_AT 202657_S_AT 202770_S_AT 203087_S_AT 203250_AT 203667_AT 203781_AT 204484_AT 205133_S_AT 205644_S_AT 205849_S_AT 206074_S_AT 207335_X_AT 207812_S_AT 208066_S_AT 208863_…
HPA	cerebellum; Purkinje cells[в‰ҐMedium]	HPA:0090162	false	9.02915e-07	6.04435	4126	442	225	11019	1554078_S_AT 1554390_S_AT 1554868_S_AT 1559078_AT 1567214_A_AT 1569594_A_AT 200050_AT 201039_S_AT 201138_S_AT 201223_S_AT 201266_AT 201280_S_AT 201304_AT 201327_S_AT 201363_S_AT 201376_S_AT 201384_S_AT 201408_AT 201518_AT 201568_AT 201569_S_AT 201595_S_AT 201637_S_AT 201699_AT 201713_S_AT 201754_AT 201879_AT 201971_S_AT 202041_S_AT 202060_AT 202097_AT 202138_X_AT 202146_AT 202233_S_AT 202279_AT 2…
HPA	epididymis; glandular cells[в‰ҐMedium]	HPA:0180052	false	1.08144e-06	5.966	5693	442	288	11019	1554078_S_AT 1554390_S_AT 1554868_S_AT 1567214_A_AT 1569594_A_AT 200050_AT 200679_X_AT 201039_S_AT 201091_S_AT 201138_S_AT 201175_AT 201218_AT 201223_S_AT 201266_AT 201280_S_AT 201304_AT 201327_S_AT 201363_S_AT 201369_S_AT 201376_S_AT 201384_S_AT 201408_AT 201518_AT 201568_AT 201569_S_AT 201595_S_AT 201637_S_AT 201678_S_AT 201687_S_AT 201699_AT 201713_S_AT 201754_AT 201757_AT 201879_AT 201971_S_A…
HPA	placenta; trophoblastic cells[в‰ҐMedium]	HPA:0380522	false	1.54942e-06	5.80983	5050	442	262	11019	1554078_S_AT 1554390_S_AT 1567214_A_AT 1569594_A_AT 200050_AT 200679_X_AT 201039_S_AT 201138_S_AT 201218_AT 201223_S_AT 201266_AT 201304_AT 201327_S_AT 201363_S_AT 201376_S_AT 201384_S_AT 201569_S_AT 201595_S_AT 201637_S_AT 201687_S_AT 201699_AT 201754_AT 201757_AT 201879_AT 201971_S_AT 202041_S_AT 202060_AT 202097_AT 202138_X_AT 202146_AT 202163_S_AT 202279_AT 202325_S_AT 202657_S_AT 202673_AT 2…
HPA	cerebral cortex; glial cells[в‰ҐLow]	HPA:0100121	false	1.59512e-06	5.79721	4927	442	257	11019	1554078_S_AT 1554390_S_AT 1554868_S_AT 1567214_A_AT 1569594_A_AT 200050_AT 200679_X_AT 201039_S_AT 201138_S_AT 201218_AT 201223_S_AT 201266_AT 201300_S_AT 201304_AT 201327_S_AT 201363_S_AT 201376_S_AT 201384_S_AT 201408_AT 201518_AT 201568_AT 201569_S_AT 201595_S_AT 201637_S_AT 201687_S_AT 201699_AT 201713_S_AT 201754_AT 201757_AT 201971_S_AT 202060_AT 202097_AT 202138_X_AT 202146_AT 202163_S_AT …
HPA	testis; Leydig cells[в‰ҐLow]	HPA:0570731	false	1.6752e-06	5.77593	7157	442	342	11019	1554078_S_AT 1554390_S_AT 1554868_S_AT 1559946_S_AT 1567214_A_AT 1569594_A_AT 200050_AT 200679_X_AT 200970_S_AT 201039_S_AT 201138_S_AT 201175_AT 201218_AT 201223_S_AT 201266_AT 201304_AT 201327_S_AT 201363_S_AT 201369_S_AT 201376_S_AT 201384_S_AT 201408_AT 201518_AT 201568_AT 201569_S_AT 201678_S_AT 201687_S_AT 201699_AT 201713_S_AT 201754_AT 201757_AT 201879_AT 201917_S_AT 201971_S_AT 202041_S_…
HPA	prostate; glandular cells[в‰ҐMedium]	HPA:0390052	false	1.81305e-06	5.74159	4809	442	252	11019	1554078_S_AT 1554390_S_AT 1554868_S_AT 1567214_A_AT 1569594_A_AT 200050_AT 200679_X_AT 201039_S_AT 201091_S_AT 201138_S_AT 201218_AT 201223_S_AT 201266_AT 201304_AT 201327_S_AT 201369_S_AT 201376_S_AT 201384_S_AT 201518_AT 201568_AT 201569_S_AT 201595_S_AT 201637_S_AT 201678_S_AT 201687_S_AT 201699_AT 201713_S_AT 201754_AT 201757_AT 201879_AT 201930_AT 201971_S_AT 202041_S_AT 202097_AT 202138_X_A…
HPA	parathyroid gland	HPA:0360000	false	1.8659e-06	5.72911	5898	442	295	11019	1554078_S_AT 1554390_S_AT 1554868_S_AT 1569594_A_AT 200050_AT 200679_X_AT 200970_S_AT 201039_S_AT 201138_S_AT 201175_AT 201218_AT 201223_S_AT 201266_AT 201280_S_AT 201304_AT 201327_S_AT 201376_S_AT 201384_S_AT 201518_AT 201568_AT 201569_S_AT 201595_S_AT 201637_S_AT 201699_AT 201713_S_AT 201754_AT 201757_AT 201879_AT 201930_AT 201971_S_AT 202041_S_AT 202097_AT 202138_X_AT 202146_AT 202163_S_AT 202…
HPA	parathyroid gland; glandular cells[в‰ҐLow]	HPA:0360051	false	1.8659e-06	5.72911	5898	442	295	11019	1554078_S_AT 1554390_S_AT 1554868_S_AT 1569594_A_AT 200050_AT 200679_X_AT 200970_S_AT 201039_S_AT 201138_S_AT 201175_AT 201218_AT 201223_S_AT 201266_AT 201280_S_AT 201304_AT 201327_S_AT 201376_S_AT 201384_S_AT 201518_AT 201568_AT 201569_S_AT 201595_S_AT 201637_S_AT 201699_AT 201713_S_AT 201754_AT 201757_AT 201879_AT 201930_AT 201971_S_AT 202041_S_AT 202097_AT 202138_X_AT 202146_AT 202163_S_AT 202…
HPA	adipose tissue; adipocytes[в‰ҐLow]	HPA:0010011	false	1.89126e-06	5.72325	3943	442	216	11019	1554390_S_AT 1554868_S_AT 1559946_S_AT 1567214_A_AT 200050_AT 200679_X_AT 201091_S_AT 201138_S_AT 201223_S_AT 201266_AT 201280_S_AT 201304_AT 201327_S_AT 201369_S_AT 201376_S_AT 201384_S_AT 201518_AT 201568_AT 201569_S_AT 201595_S_AT 201678_S_AT 201687_S_AT 201699_AT 201713_S_AT 201754_AT 201757_AT 201879_AT 201917_S_AT 201971_S_AT 202060_AT 202097_AT 202138_X_AT 202163_S_AT 202325_S_AT 202428_X_…
HPA	adipose tissue	HPA:0010000	false	1.89126e-06	5.72325	3943	442	216	11019	1554390_S_AT 1554868_S_AT 1559946_S_AT 1567214_A_AT 200050_AT 200679_X_AT 201091_S_AT 201138_S_AT 201223_S_AT 201266_AT 201280_S_AT 201304_AT 201327_S_AT 201369_S_AT 201376_S_AT 201384_S_AT 201518_AT 201568_AT 201569_S_AT 201595_S_AT 201678_S_AT 201687_S_AT 201699_AT 201713_S_AT 201754_AT 201757_AT 201879_AT 201917_S_AT 201971_S_AT 202060_AT 202097_AT 202138_X_AT 202163_S_AT 202325_S_AT 202428_X_…
HPA	fallopian tube; glandular cells[в‰ҐLow]	HPA:0210051	false	2.21287e-06	5.65504	5776	442	290	11019	1554078_S_AT 1554390_S_AT 1554868_S_AT 1567214_A_AT 1569594_A_AT 200050_AT 200679_X_AT 200970_S_AT 201039_S_AT 201091_S_AT 201138_S_AT 201223_S_AT 201266_AT 201304_AT 201327_S_AT 201363_S_AT 201369_S_AT 201376_S_AT 201384_S_AT 201408_AT 201518_AT 201568_AT 201569_S_AT 201595_S_AT 201637_S_AT 201678_S_AT 201687_S_AT 201699_AT 201713_S_AT 201754_AT 201757_AT 201879_AT 201917_S_AT 201971_S_AT 202041…
HPA	colon; glandular cells[в‰ҐMedium]	HPA:0130052	false	2.43809e-06	5.61295	5988	442	298	11019	1554078_S_AT 1554390_S_AT 1554868_S_AT 1569594_A_AT 200970_S_AT 201039_S_AT 201091_S_AT 201138_S_AT 201175_AT 201218_AT 201223_S_AT 201266_AT 201304_AT 201327_S_AT 201363_S_AT 201369_S_AT 201376_S_AT 201384_S_AT 201518_AT 201568_AT 201569_S_AT 201595_S_AT 201637_S_AT 201678_S_AT 201687_S_AT 201699_AT 201713_S_AT 201754_AT 201757_AT 201879_AT 201917_S_AT 201971_S_AT 202060_AT 202097_AT 202138_X_AT…
HPA	urinary bladder; urothelial cells[High]	HPA:0610833	false	2.66231e-06	5.57474	2038	442	130	11019	1554078_S_AT 1554868_S_AT 1567214_A_AT 200050_AT 200679_X_AT 201138_S_AT 201223_S_AT 201266_AT 201327_S_AT 201376_S_AT 201518_AT 201569_S_AT 201595_S_AT 201637_S_AT 201678_S_AT 201687_S_AT 201713_S_AT 201754_AT 201757_AT 201930_AT 201971_S_AT 202097_AT 202233_S_AT 202279_AT 202325_S_AT 202657_S_AT 202918_S_AT 203087_S_AT 203250_AT 203667_AT 203781_AT 204484_AT 205133_S_AT 205668_AT 205849_S_AT 20…
HPA	parathyroid gland; glandular cells[в‰ҐMedium]	HPA:0360052	false	2.86664e-06	5.54263	4414	442	235	11019	1554078_S_AT 1554390_S_AT 1554868_S_AT 1569594_A_AT 200050_AT 200679_X_AT 200970_S_AT 201138_S_AT 201223_S_AT 201266_AT 201304_AT 201327_S_AT 201376_S_AT 201384_S_AT 201518_AT 201568_AT 201569_S_AT 201595_S_AT 201637_S_AT 201699_AT 201713_S_AT 201754_AT 201757_AT 201879_AT 201930_AT 201971_S_AT 202041_S_AT 202097_AT 202138_X_AT 202146_AT 202163_S_AT 202233_S_AT 202279_AT 202325_S_AT 202428_X_AT 2…
HPA	bronchus; respiratory epithelial cells[в‰ҐMedium]	HPA:0060102	false	3.62323e-06	5.4409	4938	442	256	11019	1554078_S_AT 1554390_S_AT 1554868_S_AT 1567214_A_AT 1569594_A_AT 200050_AT 200679_X_AT 201039_S_AT 201091_S_AT 201138_S_AT 201223_S_AT 201266_AT 201304_AT 201327_S_AT 201363_S_AT 201369_S_AT 201376_S_AT 201384_S_AT 201408_AT 201518_AT 201568_AT 201569_S_AT 201595_S_AT 201637_S_AT 201678_S_AT 201699_AT 201713_S_AT 201754_AT 201757_AT 201879_AT 201971_S_AT 202041_S_AT 202060_AT 202097_AT 202138_X_A…
HPA	colon; endothelial cells[в‰ҐLow]	HPA:0130201	false	4.11478e-06	5.38565	5675	442	285	11019	1553678_A_AT 1554078_S_AT 1554390_S_AT 1554868_S_AT 1567214_A_AT 1569594_A_AT 200679_X_AT 201039_S_AT 201091_S_AT 201138_S_AT 201218_AT 201223_S_AT 201266_AT 201300_S_AT 201304_AT 201327_S_AT 201363_S_AT 201369_S_AT 201376_S_AT 201384_S_AT 201518_AT 201568_AT 201569_S_AT 201595_S_AT 201637_S_AT 201678_S_AT 201687_S_AT 201699_AT 201713_S_AT 201754_AT 201757_AT 201879_AT 201917_S_AT 201971_S_AT 202…
HPA	oral mucosa; squamous epithelial cells[в‰ҐLow]	HPA:0330221	false	5.04428e-06	5.2972	6257	442	307	11019	1554078_S_AT 1554390_S_AT 1554868_S_AT 1559078_AT 1567214_A_AT 1569594_A_AT 200050_AT 200679_X_AT 201039_S_AT 201091_S_AT 201138_S_AT 201175_AT 201223_S_AT 201266_AT 201280_S_AT 201304_AT 201327_S_AT 201363_S_AT 201369_S_AT 201376_S_AT 201408_AT 201518_AT 201568_AT 201569_S_AT 201595_S_AT 201637_S_AT 201678_S_AT 201687_S_AT 201699_AT 201713_S_AT 201754_AT 201757_AT 201879_AT 201917_S_AT 201930_AT…
HPA	oral mucosa	HPA:0330000	false	5.04428e-06	5.2972	6257	442	307	11019	1554078_S_AT 1554390_S_AT 1554868_S_AT 1559078_AT 1567214_A_AT 1569594_A_AT 200050_AT 200679_X_AT 201039_S_AT 201091_S_AT 201138_S_AT 201175_AT 201223_S_AT 201266_AT 201280_S_AT 201304_AT 201327_S_AT 201363_S_AT 201369_S_AT 201376_S_AT 201408_AT 201518_AT 201568_AT 201569_S_AT 201595_S_AT 201637_S_AT 201678_S_AT 201687_S_AT 201699_AT 201713_S_AT 201754_AT 201757_AT 201879_AT 201917_S_AT 201930_AT…
HPA	skin 1; melanocytes[в‰ҐLow]	HPA:0460671	false	8.65967e-06	5.0625	5302	442	269	11019	1554078_S_AT 1554390_S_AT 1554868_S_AT 1559078_AT 1567214_A_AT 1569594_A_AT 200050_AT 200679_X_AT 200970_S_AT 201039_S_AT 201091_S_AT 201138_S_AT 201218_AT 201223_S_AT 201266_AT 201304_AT 201327_S_AT 201363_S_AT 201369_S_AT 201376_S_AT 201408_AT 201518_AT 201568_AT 201569_S_AT 201595_S_AT 201637_S_AT 201678_S_AT 201687_S_AT 201699_AT 201713_S_AT 201754_AT 201757_AT 201879_AT 201971_S_AT 202060_AT…
HPA	soft tissue 2	HPA:0510000	false	9.77164e-06	5.01003	5207	442	265	11019	1554868_S_AT 1567214_A_AT 1569594_A_AT 200050_AT 200679_X_AT 200970_S_AT 201039_S_AT 201091_S_AT 201138_S_AT 201218_AT 201223_S_AT 201266_AT 201280_S_AT 201300_S_AT 201304_AT 201327_S_AT 201363_S_AT 201369_S_AT 201376_S_AT 201518_AT 201569_S_AT 201595_S_AT 201678_S_AT 201699_AT 201713_S_AT 201754_AT 201757_AT 201879_AT 201971_S_AT 202060_AT 202097_AT 202146_AT 202163_S_AT 202279_AT 202325_S_AT 20…
HPA	duodenum; glandular cells[в‰ҐMedium]	HPA:0150052	false	1.03523e-05	4.98496	6106	442	300	11019	1554078_S_AT 1554390_S_AT 1554868_S_AT 1567214_A_AT 1569594_A_AT 200050_AT 200970_S_AT 201039_S_AT 201091_S_AT 201138_S_AT 201175_AT 201218_AT 201223_S_AT 201266_AT 201304_AT 201327_S_AT 201363_S_AT 201369_S_AT 201376_S_AT 201384_S_AT 201518_AT 201568_AT 201569_S_AT 201595_S_AT 201637_S_AT 201678_S_AT 201687_S_AT 201699_AT 201713_S_AT 201754_AT 201757_AT 201879_AT 201917_S_AT 201971_S_AT 202041_S…
HPA	kidney; cells in tubules[в‰ҐMedium]	HPA:0270362	false	1.17374e-05	4.93043	5826	442	289	11019	1554078_S_AT 1554390_S_AT 1554868_S_AT 1559078_AT 1567214_A_AT 1569594_A_AT 200679_X_AT 200970_S_AT 201039_S_AT 201091_S_AT 201138_S_AT 201175_AT 201223_S_AT 201266_AT 201327_S_AT 201363_S_AT 201369_S_AT 201376_S_AT 201384_S_AT 201408_AT 201518_AT 201568_AT 201569_S_AT 201595_S_AT 201637_S_AT 201687_S_AT 201699_AT 201713_S_AT 201917_S_AT 201971_S_AT 202060_AT 202097_AT 202138_X_AT 202146_AT 20216…
HPA	placenta; decidual cells[в‰ҐLow]	HPA:0380511	false	1.38563e-05	4.85835	4850	442	250	11019	1553678_A_AT 1554078_S_AT 1554390_S_AT 1559946_S_AT 1567214_A_AT 1569594_A_AT 200050_AT 200679_X_AT 201039_S_AT 201138_S_AT 201218_AT 201223_S_AT 201266_AT 201280_S_AT 201304_AT 201369_S_AT 201376_S_AT 201408_AT 201595_S_AT 201637_S_AT 201678_S_AT 201754_AT 201757_AT 201879_AT 201917_S_AT 202041_S_AT 202060_AT 202097_AT 202138_X_AT 202146_AT 202163_S_AT 202233_S_AT 202279_AT 202298_AT 202325_S_AT…
HPA	small intestine; glandular cells[High]	HPA:0480053	false	1.45135e-05	4.83823	2546	442	151	11019	1554078_S_AT 1554868_S_AT 201138_S_AT 201223_S_AT 201304_AT 201327_S_AT 201369_S_AT 201376_S_AT 201568_AT 201569_S_AT 201595_S_AT 201637_S_AT 201678_S_AT 201687_S_AT 201713_S_AT 201754_AT 201757_AT 201879_AT 202097_AT 202163_S_AT 202233_S_AT 202279_AT 202298_AT 202325_S_AT 202657_S_AT 202673_AT 202918_S_AT 203250_AT 203371_S_AT 203497_AT 203667_AT 203675_AT 203781_AT 203831_AT 205849_S_AT 207335_…
HPA	esophagus; squamous epithelial cells[в‰ҐMedium]	HPA:0190222	false	1.71229e-05	4.76642	5058	442	258	11019	1554078_S_AT 1554868_S_AT 1559078_AT 1567214_A_AT 1569594_A_AT 200050_AT 200679_X_AT 201039_S_AT 201138_S_AT 201175_AT 201223_S_AT 201304_AT 201327_S_AT 201376_S_AT 201408_AT 201518_AT 201568_AT 201569_S_AT 201595_S_AT 201637_S_AT 201678_S_AT 201687_S_AT 201699_AT 201713_S_AT 201754_AT 201757_AT 201879_AT 201930_AT 201971_S_AT 202060_AT 202097_AT 202138_X_AT 202163_S_AT 202233_S_AT 202279_AT 2022…
HPA	rectum; glandular cells[High]	HPA:0400053	false	1.75454e-05	4.75584	2575	442	152	11019	1554078_S_AT 1554868_S_AT 1567214_A_AT 1569594_A_AT 200050_AT 201138_S_AT 201218_AT 201223_S_AT 201266_AT 201304_AT 201327_S_AT 201376_S_AT 201518_AT 201568_AT 201569_S_AT 201595_S_AT 201637_S_AT 201713_S_AT 201754_AT 201757_AT 201879_AT 201971_S_AT 202097_AT 202163_S_AT 202233_S_AT 202279_AT 202298_AT 202325_S_AT 202428_X_AT 202657_S_AT 202673_AT 202918_S_AT 203250_AT 203310_AT 203371_S_AT 20349…
HPA	endometrium 2; glandular cells[в‰ҐMedium]	HPA:0170052	false	1.81049e-05	4.7422	4887	442	251	11019	1554078_S_AT 1554390_S_AT 1554868_S_AT 1567214_A_AT 1569594_A_AT 200050_AT 200679_X_AT 201039_S_AT 201091_S_AT 201138_S_AT 201223_S_AT 201266_AT 201304_AT 201327_S_AT 201363_S_AT 201369_S_AT 201376_S_AT 201384_S_AT 201408_AT 201518_AT 201568_AT 201569_S_AT 201595_S_AT 201637_S_AT 201678_S_AT 201687_S_AT 201699_AT 201713_S_AT 201754_AT 201757_AT 201879_AT 201930_AT 201971_S_AT 202060_AT 202097_AT …
HPA	kidney; cells in glomeruli[в‰ҐLow]	HPA:0270351	false	2.1291e-05	4.6718	5168	442	262	11019	1553678_A_AT 1554078_S_AT 1554390_S_AT 1554868_S_AT 1567214_A_AT 1569594_A_AT 200050_AT 200679_X_AT 200970_S_AT 201039_S_AT 201091_S_AT 201138_S_AT 201223_S_AT 201266_AT 201304_AT 201369_S_AT 201376_S_AT 201384_S_AT 201408_AT 201518_AT 201569_S_AT 201595_S_AT 201637_S_AT 201678_S_AT 201699_AT 201713_S_AT 201754_AT 201757_AT 201879_AT 201917_S_AT 201971_S_AT 202060_AT 202097_AT 202146_AT 202279_AT…
HPA	stomach 1; glandular cells[в‰ҐMedium]	HPA:0540052	false	2.16371e-05	4.6648	6351	442	308	11019	1554078_S_AT 1554390_S_AT 1554868_S_AT 1559078_AT 1567214_A_AT 1569594_A_AT 200050_AT 200679_X_AT 201039_S_AT 201091_S_AT 201138_S_AT 201175_AT 201218_AT 201223_S_AT 201266_AT 201304_AT 201327_S_AT 201363_S_AT 201369_S_AT 201376_S_AT 201384_S_AT 201408_AT 201518_AT 201568_AT 201569_S_AT 201595_S_AT 201637_S_AT 201678_S_AT 201699_AT 201713_S_AT 201754_AT 201757_AT 201879_AT 201917_S_AT 201930_AT 2…
HPA	endometrium 1; cells in endometrial stroma[в‰ҐLow]	HPA:0160251	false	2.48138e-05	4.60531	4077	442	217	11019	1554078_S_AT 1554868_S_AT 1567214_A_AT 1569594_A_AT 200050_AT 200679_X_AT 201039_S_AT 201091_S_AT 201138_S_AT 201223_S_AT 201266_AT 201280_S_AT 201304_AT 201327_S_AT 201363_S_AT 201369_S_AT 201376_S_AT 201384_S_AT 201518_AT 201569_S_AT 201595_S_AT 201637_S_AT 201699_AT 201713_S_AT 201754_AT 201757_AT 201879_AT 201971_S_AT 202097_AT 202138_X_AT 202146_AT 202279_AT 202298_AT 202325_S_AT 202657_S_AT…
HPA	appendix; glandular cells[High]	HPA:0030053	false	2.53441e-05	4.59612	1882	442	119	11019	1554078_S_AT 1554868_S_AT 200050_AT 201138_S_AT 201218_AT 201223_S_AT 201304_AT 201376_S_AT 201384_S_AT 201568_AT 201569_S_AT 201595_S_AT 201637_S_AT 201687_S_AT 201713_S_AT 201754_AT 201757_AT 202097_AT 202233_S_AT 202279_AT 202298_AT 202325_S_AT 202428_X_AT 202673_AT 202798_AT 202918_S_AT 203087_S_AT 203250_AT 203310_AT 203371_S_AT 203667_AT 203781_AT 204484_AT 205849_S_AT 207335_X_AT 208863_S_…
HPA	cerebral cortex; endothelial cells[в‰ҐLow]	HPA:0100201	false	2.62144e-05	4.58146	4634	442	240	11019	1553678_A_AT 1554390_S_AT 1554868_S_AT 1567214_A_AT 1569594_A_AT 200050_AT 200679_X_AT 200970_S_AT 201091_S_AT 201138_S_AT 201218_AT 201223_S_AT 201266_AT 201304_AT 201327_S_AT 201363_S_AT 201376_S_AT 201518_AT 201568_AT 201595_S_AT 201637_S_AT 201678_S_AT 201687_S_AT 201699_AT 201713_S_AT 201754_AT 201879_AT 202060_AT 202138_X_AT 202146_AT 202163_S_AT 202279_AT 202298_AT 202325_S_AT 202425_X_AT …
HPA	cervix; glandular cells[в‰ҐMedium]	HPA:0630052	false	2.87156e-05	4.54188	4036	442	215	11019	1554078_S_AT 1554390_S_AT 1554868_S_AT 1559946_S_AT 1567214_A_AT 1569594_A_AT 200050_AT 200679_X_AT 201039_S_AT 201091_S_AT 201138_S_AT 201223_S_AT 201266_AT 201304_AT 201363_S_AT 201518_AT 201568_AT 201595_S_AT 201637_S_AT 201687_S_AT 201699_AT 201713_S_AT 201754_AT 201757_AT 201879_AT 202041_S_AT 202060_AT 202097_AT 202146_AT 202163_S_AT 202279_AT 202298_AT 202325_S_AT 202428_X_AT 202657_S_AT 2…
HPA	skin 1; cells in basal layer[в‰ҐLow]	HPA:0461391	false	2.89424e-05	4.53847	881	442	68	11019	1553678_A_AT 1554868_S_AT 1559946_S_AT 200679_X_AT 201091_S_AT 201138_S_AT 201223_S_AT 201304_AT 201408_AT 201518_AT 201595_S_AT 201754_AT 201757_AT 201930_AT 202298_AT 202425_X_AT 202657_S_AT 202776_AT 202897_AT 204132_S_AT 205133_S_AT 205484_AT 205644_S_AT 206074_S_AT 206445_S_AT 208808_S_AT 208864_S_AT 208993_S_AT 209330_S_AT 210538_S_AT 210962_S_AT 211257_X_AT 211989_AT 212040_AT 212594_AT 21…
HPA	liver; hepatocytes[в‰ҐLow]	HPA:0290401	false	3.42052e-05	4.46591	5748	442	284	11019	1554078_S_AT 1554390_S_AT 1567214_A_AT 1569594_A_AT 200679_X_AT 200970_S_AT 201039_S_AT 201091_S_AT 201138_S_AT 201175_AT 201223_S_AT 201266_AT 201304_AT 201327_S_AT 201376_S_AT 201384_S_AT 201408_AT 201518_AT 201568_AT 201569_S_AT 201595_S_AT 201637_S_AT 201687_S_AT 201699_AT 201754_AT 201757_AT 201879_AT 201917_S_AT 202041_S_AT 202097_AT 202138_X_AT 202146_AT 202163_S_AT 202233_S_AT 202279_AT 2…
HPA	colon; peripheral nerve/ganglion[в‰ҐLow]	HPA:0130241	false	3.58567e-05	4.44543	5043	442	256	11019	1553678_A_AT 1554078_S_AT 1554390_S_AT 1554868_S_AT 1569594_A_AT 201039_S_AT 201091_S_AT 201138_S_AT 201218_AT 201223_S_AT 201266_AT 201304_AT 201327_S_AT 201363_S_AT 201376_S_AT 201384_S_AT 201518_AT 201569_S_AT 201595_S_AT 201637_S_AT 201678_S_AT 201687_S_AT 201699_AT 201754_AT 201757_AT 201879_AT 201971_S_AT 202041_S_AT 202060_AT 202097_AT 202138_X_AT 202146_AT 202163_S_AT 202233_S_AT 202279_A…
HPA	skin 2; cells in basal layer[в‰ҐLow]	HPA:0471391	false	3.90811e-05	4.40803	962	442	72	11019	1553678_A_AT 1554868_S_AT 1559946_S_AT 200679_X_AT 201091_S_AT 201138_S_AT 201223_S_AT 201304_AT 201408_AT 201518_AT 201595_S_AT 201754_AT 201757_AT 201930_AT 202298_AT 202425_X_AT 202657_S_AT 202776_AT 202897_AT 204132_S_AT 205133_S_AT 205484_AT 205644_S_AT 206074_S_AT 206445_S_AT 208808_S_AT 208864_S_AT 208993_S_AT 209330_S_AT 210538_S_AT 210962_S_AT 211257_X_AT 211989_AT 212040_AT 212594_AT 21…
HPA	fallopian tube; glandular cells[в‰ҐMedium]	HPA:0210052	false	4.11392e-05	4.38574	4704	442	242	11019	1554078_S_AT 1554390_S_AT 1554868_S_AT 1567214_A_AT 1569594_A_AT 200050_AT 200679_X_AT 201039_S_AT 201091_S_AT 201138_S_AT 201223_S_AT 201266_AT 201304_AT 201327_S_AT 201363_S_AT 201369_S_AT 201376_S_AT 201384_S_AT 201408_AT 201518_AT 201568_AT 201569_S_AT 201595_S_AT 201637_S_AT 201678_S_AT 201687_S_AT 201699_AT 201713_S_AT 201754_AT 201757_AT 201879_AT 201917_S_AT 201971_S_AT 202060_AT 202097_A…
HPA	bronchus; respiratory epithelial cells[в‰ҐLow]	HPA:0060101	false	4.17198e-05	4.37966	5938	442	291	11019	1554078_S_AT 1554390_S_AT 1554868_S_AT 1567214_A_AT 1569594_A_AT 200050_AT 200679_X_AT 201039_S_AT 201091_S_AT 201138_S_AT 201223_S_AT 201266_AT 201304_AT 201327_S_AT 201363_S_AT 201369_S_AT 201376_S_AT 201384_S_AT 201408_AT 201518_AT 201568_AT 201569_S_AT 201595_S_AT 201637_S_AT 201678_S_AT 201687_S_AT 201699_AT 201713_S_AT 201754_AT 201757_AT 201879_AT 201917_S_AT 201971_S_AT 202041_S_AT 202060…
HPA	ovary; ovarian stroma cells[в‰ҐLow]	HPA:0340461	false	4.58952e-05	4.33823	3986	442	212	11019	1554078_S_AT 1554868_S_AT 1567214_A_AT 1569594_A_AT 200050_AT 200679_X_AT 200970_S_AT 201039_S_AT 201091_S_AT 201138_S_AT 201223_S_AT 201266_AT 201304_AT 201363_S_AT 201376_S_AT 201384_S_AT 201408_AT 201518_AT 201569_S_AT 201595_S_AT 201637_S_AT 201678_S_AT 201687_S_AT 201699_AT 201713_S_AT 201754_AT 201757_AT 201879_AT 201971_S_AT 202060_AT 202097_AT 202146_AT 202279_AT 202325_S_AT 202657_S_AT 2…
HPA	liver; cholangiocytes[в‰ҐLow]	HPA:0291161	false	4.8702e-05	4.31245	3965	442	211	11019	1554078_S_AT 1554390_S_AT 1554868_S_AT 1569594_A_AT 200050_AT 200679_X_AT 201138_S_AT 201223_S_AT 201266_AT 201280_S_AT 201304_AT 201327_S_AT 201384_S_AT 201518_AT 201569_S_AT 201595_S_AT 201678_S_AT 201699_AT 201713_S_AT 201754_AT 202097_AT 202138_X_AT 202146_AT 202163_S_AT 202279_AT 202325_S_AT 202428_X_AT 202460_S_AT 202657_S_AT 202673_AT 202704_AT 202798_AT 202888_S_AT 203076_S_AT 203250_AT 2…
HPA	cerebral cortex; glial cells[в‰ҐMedium]	HPA:0100122	false	4.92208e-05	4.30785	2681	442	155	11019	1554868_S_AT 1567214_A_AT 1569594_A_AT 200050_AT 200679_X_AT 201039_S_AT 201138_S_AT 201223_S_AT 201266_AT 201304_AT 201376_S_AT 201384_S_AT 201408_AT 201518_AT 201568_AT 201569_S_AT 201595_S_AT 201687_S_AT 201699_AT 201713_S_AT 201757_AT 201971_S_AT 202060_AT 202097_AT 202146_AT 202163_S_AT 202279_AT 202325_S_AT 202428_X_AT 202657_S_AT 202918_S_AT 203076_S_AT 203087_S_AT 203250_AT 203371_S_AT 20…
HPA	colon; glandular cells[High]	HPA:0130053	false	4.99621e-05	4.30136	2418	442	143	11019	1554078_S_AT 1554868_S_AT 201138_S_AT 201223_S_AT 201304_AT 201327_S_AT 201376_S_AT 201518_AT 201568_AT 201569_S_AT 201595_S_AT 201637_S_AT 201678_S_AT 201713_S_AT 201754_AT 201757_AT 201971_S_AT 202097_AT 202233_S_AT 202279_AT 202298_AT 202325_S_AT 202657_S_AT 202673_AT 202798_AT 202918_S_AT 203087_S_AT 203250_AT 203310_AT 203371_S_AT 203497_AT 203675_AT 203831_AT 205849_S_AT 207335_X_AT 208066_…
HPA	skin 1; melanocytes[в‰ҐMedium]	HPA:0460672	false	5.09453e-05	4.2929	3708	442	200	11019	1554078_S_AT 1554390_S_AT 1554868_S_AT 1559078_AT 1567214_A_AT 1569594_A_AT 200050_AT 200679_X_AT 201039_S_AT 201091_S_AT 201138_S_AT 201223_S_AT 201266_AT 201304_AT 201327_S_AT 201363_S_AT 201369_S_AT 201376_S_AT 201408_AT 201518_AT 201568_AT 201595_S_AT 201637_S_AT 201678_S_AT 201687_S_AT 201699_AT 201754_AT 201757_AT 201879_AT 201971_S_AT 202060_AT 202097_AT 202138_X_AT 202233_S_AT 202279_AT 2…
HPA	skin 2; cells in basal layer[в‰ҐMedium]	HPA:0471392	false	6.4896e-05	4.18778	754	442	60	11019	1553678_A_AT 1554868_S_AT 200679_X_AT 201091_S_AT 201138_S_AT 201223_S_AT 201304_AT 201408_AT 201518_AT 201595_S_AT 201754_AT 201757_AT 201930_AT 202298_AT 202657_S_AT 202776_AT 204132_S_AT 205133_S_AT 205484_AT 205644_S_AT 206074_S_AT 206445_S_AT 208808_S_AT 208864_S_AT 208993_S_AT 210538_S_AT 210962_S_AT 211257_X_AT 211989_AT 212040_AT 212594_AT 213251_AT 213746_S_AT 214512_S_AT 214709_S_AT 215…
HPA	endometrium 1; cells in endometrial stroma[в‰ҐMedium]	HPA:0160252	false	6.674e-05	4.17561	2234	442	134	11019	1554078_S_AT 1554868_S_AT 1567214_A_AT 200050_AT 200679_X_AT 201039_S_AT 201091_S_AT 201138_S_AT 201223_S_AT 201266_AT 201280_S_AT 201304_AT 201363_S_AT 201376_S_AT 201518_AT 201569_S_AT 201595_S_AT 201754_AT 201757_AT 201971_S_AT 202146_AT 202279_AT 202325_S_AT 202657_S_AT 202673_AT 203076_S_AT 203250_AT 203667_AT 204132_S_AT 205133_S_AT 205644_S_AT 205690_S_AT 205849_S_AT 207335_X_AT 207812_S_A…
HPA	smooth muscle; smooth muscle cells[в‰ҐMedium]	HPA:0490692	false	7.6885e-05	4.11416	3126	442	174	11019	1553678_A_AT 1554078_S_AT 1554868_S_AT 1567214_A_AT 1569594_A_AT 200050_AT 200679_X_AT 201039_S_AT 201138_S_AT 201223_S_AT 201266_AT 201304_AT 201369_S_AT 201376_S_AT 201408_AT 201518_AT 201569_S_AT 201595_S_AT 201637_S_AT 201699_AT 201713_S_AT 201754_AT 202060_AT 202097_AT 202146_AT 202163_S_AT 202279_AT 202325_S_AT 202460_S_AT 202657_S_AT 202673_AT 202704_AT 202798_AT 202918_S_AT 203076_S_AT 20…
HPA	endometrium 1; glandular cells[в‰ҐMedium]	HPA:0160052	false	7.74957e-05	4.11072	5155	442	259	11019	1554078_S_AT 1554390_S_AT 1554868_S_AT 1559946_S_AT 1567214_A_AT 1569594_A_AT 200050_AT 200679_X_AT 201039_S_AT 201091_S_AT 201138_S_AT 201218_AT 201223_S_AT 201266_AT 201280_S_AT 201304_AT 201327_S_AT 201363_S_AT 201369_S_AT 201384_S_AT 201408_AT 201518_AT 201568_AT 201569_S_AT 201595_S_AT 201637_S_AT 201687_S_AT 201699_AT 201713_S_AT 201754_AT 201757_AT 201879_AT 201930_AT 201971_S_AT 202097_AT…
HPA	placenta; decidual cells[в‰ҐMedium]	HPA:0380512	false	8.52342e-05	4.06939	3591	442	194	11019	1553678_A_AT 1554078_S_AT 1554390_S_AT 1559946_S_AT 1567214_A_AT 1569594_A_AT 200050_AT 200679_X_AT 201039_S_AT 201138_S_AT 201218_AT 201223_S_AT 201266_AT 201304_AT 201376_S_AT 201408_AT 201595_S_AT 201637_S_AT 201678_S_AT 201754_AT 201757_AT 201879_AT 201917_S_AT 202060_AT 202097_AT 202138_X_AT 202146_AT 202163_S_AT 202233_S_AT 202279_AT 202325_S_AT 202657_S_AT 202673_AT 202704_AT 202719_S_AT 2…
HPA	seminal vesicle; glandular cells[High]	HPA:0430053	false	8.86311e-05	4.05241	1471	442	97	11019	1554078_S_AT 1554868_S_AT 1567214_A_AT 201138_S_AT 201223_S_AT 201304_AT 201327_S_AT 201376_S_AT 201518_AT 201568_AT 201569_S_AT 201595_S_AT 201713_S_AT 201754_AT 201757_AT 202041_S_AT 202097_AT 202163_S_AT 202233_S_AT 202279_AT 202298_AT 202325_S_AT 202428_X_AT 202918_S_AT 203250_AT 203371_S_AT 203781_AT 203831_AT 205133_S_AT 205849_S_AT 206074_S_AT 207812_S_AT 208066_S_AT 208442_S_AT 208863_S_A…
HPA	cerebellum; cells in granular layer[в‰ҐLow]	HPA:0090181	false	9.56542e-05	4.0193	4549	442	234	11019	1554078_S_AT 1554868_S_AT 1567214_A_AT 1569594_A_AT 200050_AT 200970_S_AT 201039_S_AT 201091_S_AT 201138_S_AT 201223_S_AT 201266_AT 201280_S_AT 201304_AT 201327_S_AT 201363_S_AT 201376_S_AT 201384_S_AT 201408_AT 201518_AT 201568_AT 201569_S_AT 201595_S_AT 201637_S_AT 201699_AT 201713_S_AT 201754_AT 202041_S_AT 202060_AT 202097_AT 202163_S_AT 202209_AT 202233_S_AT 202279_AT 202298_AT 202325_S_AT 2…
HPA	skin 2; lymphocytes[в‰ҐLow]	HPA:0471471	false	0.000110325	3.95732	802	442	62	11019	1554868_S_AT 1559946_S_AT 200679_X_AT 201138_S_AT 201223_S_AT 201304_AT 201408_AT 201518_AT 201595_S_AT 201754_AT 201757_AT 201930_AT 202657_S_AT 202776_AT 202897_AT 204132_S_AT 205133_S_AT 205484_AT 205644_S_AT 206074_S_AT 208808_S_AT 208864_S_AT 208993_S_AT 209330_S_AT 210538_S_AT 210962_S_AT 211257_X_AT 211989_AT 212040_AT 212594_AT 213251_AT 213746_S_AT 214512_S_AT 214709_S_AT 215716_S_AT 217…
HPA	cerebellum; cells in molecular layer[в‰ҐLow]	HPA:0090191	false	0.000113194	3.94618	4460	442	230	11019	1554078_S_AT 1554390_S_AT 1554868_S_AT 1567214_A_AT 1569594_A_AT 200050_AT 200970_S_AT 201039_S_AT 201091_S_AT 201138_S_AT 201223_S_AT 201266_AT 201280_S_AT 201304_AT 201327_S_AT 201363_S_AT 201376_S_AT 201384_S_AT 201518_AT 201568_AT 201569_S_AT 201595_S_AT 201637_S_AT 201687_S_AT 201699_AT 201713_S_AT 201754_AT 201917_S_AT 201971_S_AT 202041_S_AT 202060_AT 202097_AT 202138_X_AT 202163_S_AT 2022…
HPA	pancreas; exocrine glandular cells[в‰ҐMedium]	HPA:0350472	false	0.000125141	3.9026	5304	442	264	11019	1554078_S_AT 1554390_S_AT 1554868_S_AT 1567214_A_AT 1569594_A_AT 200050_AT 200679_X_AT 201039_S_AT 201138_S_AT 201175_AT 201223_S_AT 201266_AT 201304_AT 201327_S_AT 201376_S_AT 201408_AT 201518_AT 201568_AT 201569_S_AT 201595_S_AT 201637_S_AT 201687_S_AT 201699_AT 201713_S_AT 201754_AT 201757_AT 201879_AT 201917_S_AT 201930_AT 201971_S_AT 202060_AT 202097_AT 202138_X_AT 202146_AT 202163_S_AT 2022…
HPA	spleen; cells in white pulp[в‰ҐMedium]	HPA:0530722	false	0.000128831	3.88998	2720	442	155	11019	1554078_S_AT 1554390_S_AT 1554868_S_AT 1567214_A_AT 1569594_A_AT 200679_X_AT 201039_S_AT 201138_S_AT 201223_S_AT 201304_AT 201327_S_AT 201369_S_AT 201518_AT 201569_S_AT 201595_S_AT 201678_S_AT 201699_AT 201754_AT 201757_AT 201930_AT 201971_S_AT 202060_AT 202097_AT 202163_S_AT 202233_S_AT 202279_AT 202298_AT 202325_S_AT 202425_X_AT 202673_AT 202770_S_AT 202798_AT 202897_AT 202918_S_AT 203250_AT 20…
HPA	colon; endothelial cells[в‰ҐMedium]	HPA:0130202	false	0.000165674	3.78075	3715	442	198	11019	1554078_S_AT 1554390_S_AT 1554868_S_AT 1567214_A_AT 1569594_A_AT 200679_X_AT 201039_S_AT 201091_S_AT 201218_AT 201223_S_AT 201266_AT 201300_S_AT 201304_AT 201327_S_AT 201369_S_AT 201376_S_AT 201518_AT 201569_S_AT 201595_S_AT 201637_S_AT 201678_S_AT 201687_S_AT 201699_AT 201713_S_AT 201754_AT 201757_AT 201971_S_AT 202060_AT 202097_AT 202163_S_AT 202279_AT 202325_S_AT 202657_S_AT 202673_AT 202719_S…
HPA	pancreas; pancreatic endocrine cells[в‰ҐMedium]	HPA:0351182	false	0.000175352	3.75609	3624	442	194	11019	1554078_S_AT 1554390_S_AT 1554868_S_AT 1567214_A_AT 1569594_A_AT 200050_AT 200679_X_AT 200970_S_AT 201138_S_AT 201223_S_AT 201266_AT 201304_AT 201363_S_AT 201376_S_AT 201384_S_AT 201408_AT 201518_AT 201568_AT 201569_S_AT 201595_S_AT 201637_S_AT 201678_S_AT 201699_AT 201713_S_AT 201754_AT 201757_AT 201971_S_AT 202041_S_AT 202060_AT 202097_AT 202138_X_AT 202163_S_AT 202209_AT 202233_S_AT 202279_AT …
HPA	testis; Leydig cells[в‰ҐMedium]	HPA:0570732	false	0.000199928	3.69913	5378	442	266	11019	1554078_S_AT 1554390_S_AT 1554868_S_AT 1559946_S_AT 1567214_A_AT 1569594_A_AT 200050_AT 200679_X_AT 200970_S_AT 201039_S_AT 201138_S_AT 201175_AT 201218_AT 201223_S_AT 201266_AT 201304_AT 201327_S_AT 201369_S_AT 201376_S_AT 201384_S_AT 201408_AT 201568_AT 201569_S_AT 201699_AT 201713_S_AT 201754_AT 201757_AT 201971_S_AT 202041_S_AT 202060_AT 202097_AT 202138_X_AT 202146_AT 202163_S_AT 202209_AT 2…
HPA	nasopharynx; respiratory epithelial cells[в‰ҐLow]	HPA:0320101	false	0.000240635	3.61864	5794	442	282	11019	1554078_S_AT 1554390_S_AT 1554868_S_AT 1567214_A_AT 1569594_A_AT 200679_X_AT 200970_S_AT 201039_S_AT 201091_S_AT 201138_S_AT 201223_S_AT 201266_AT 201304_AT 201327_S_AT 201363_S_AT 201369_S_AT 201376_S_AT 201384_S_AT 201408_AT 201518_AT 201568_AT 201569_S_AT 201595_S_AT 201637_S_AT 201678_S_AT 201687_S_AT 201699_AT 201713_S_AT 201754_AT 201757_AT 201879_AT 201917_S_AT 201971_S_AT 202041_S_AT 2020…
HPA	skin 2; lymphocytes[в‰ҐMedium]	HPA:0471472	false	0.000341138	3.46707	647	442	52	11019	1554868_S_AT 200679_X_AT 201138_S_AT 201223_S_AT 201304_AT 201408_AT 201518_AT 201595_S_AT 201754_AT 201757_AT 201930_AT 202657_S_AT 202897_AT 204132_S_AT 205133_S_AT 205484_AT 205644_S_AT 206074_S_AT 208808_S_AT 208864_S_AT 208993_S_AT 209330_S_AT 210962_S_AT 211257_X_AT 211989_AT 212040_AT 212594_AT 213251_AT 213746_S_AT 214512_S_AT 214709_S_AT 218178_S_AT 221771_S_AT 222035_S_AT 222231_S_AT 22…
HPA	skin 2; endothelial cells[в‰ҐLow]	HPA:0470201	false	0.000388601	3.4105	888	442	65	11019	1553678_A_AT 1554868_S_AT 1559946_S_AT 200679_X_AT 201138_S_AT 201223_S_AT 201280_S_AT 201304_AT 201408_AT 201518_AT 201595_S_AT 201754_AT 201757_AT 202425_X_AT 202657_S_AT 202776_AT 204132_S_AT 205644_S_AT 206074_S_AT 206445_S_AT 208808_S_AT 208864_S_AT 208993_S_AT 209330_S_AT 210962_S_AT 211257_X_AT 211989_AT 212040_AT 212594_AT 213251_AT 213746_S_AT 214512_S_AT 214709_S_AT 215716_S_AT 216899_S…
HPA	soft tissue 2; fibroblasts[в‰ҐMedium]	HPA:0510652	false	0.000473309	3.32486	2619	442	148	11019	1554868_S_AT 1567214_A_AT 200050_AT 200679_X_AT 201039_S_AT 201138_S_AT 201218_AT 201223_S_AT 201280_S_AT 201304_AT 201363_S_AT 201376_S_AT 201518_AT 201569_S_AT 201595_S_AT 201699_AT 201713_S_AT 201754_AT 201971_S_AT 202060_AT 202097_AT 202163_S_AT 202325_S_AT 202460_S_AT 202657_S_AT 202673_AT 202719_S_AT 202798_AT 202918_S_AT 203076_S_AT 203667_AT 203831_AT 205644_S_AT 207335_X_AT 208442_S_AT 2…
HPA	skin 1; cells in granular layer[в‰ҐLow]	HPA:0460181	false	0.000538007	3.26921	711	442	55	11019	1554868_S_AT 200679_X_AT 201091_S_AT 201138_S_AT 201223_S_AT 201300_S_AT 201304_AT 201408_AT 201518_AT 201595_S_AT 201754_AT 201757_AT 201930_AT 202657_S_AT 204132_S_AT 205644_S_AT 206074_S_AT 206445_S_AT 208808_S_AT 208864_S_AT 208993_S_AT 209301_AT 209330_S_AT 210962_S_AT 211257_X_AT 211989_AT 212040_AT 212594_AT 213251_AT 214512_S_AT 214709_S_AT 216899_S_AT 217915_S_AT 218178_S_AT 218386_X_AT …
HPA	soft tissue 2; fibroblasts[в‰ҐLow]	HPA:0510651	false	0.00056359	3.24904	4130	442	213	11019	1554868_S_AT 1567214_A_AT 200050_AT 200679_X_AT 201039_S_AT 201138_S_AT 201218_AT 201223_S_AT 201266_AT 201280_S_AT 201304_AT 201327_S_AT 201363_S_AT 201369_S_AT 201376_S_AT 201518_AT 201569_S_AT 201595_S_AT 201699_AT 201713_S_AT 201754_AT 201879_AT 201971_S_AT 202060_AT 202097_AT 202146_AT 202163_S_AT 202325_S_AT 202460_S_AT 202657_S_AT 202673_AT 202719_S_AT 202724_S_AT 202770_S_AT 202798_AT 202…
HPA	parathyroid gland; glandular cells[High]	HPA:0360053	false	0.000585408	3.23254	1553	442	98	11019	1554078_S_AT 1569594_A_AT 200050_AT 201138_S_AT 201223_S_AT 201266_AT 201304_AT 201376_S_AT 201518_AT 201568_AT 201569_S_AT 201637_S_AT 201713_S_AT 201754_AT 201757_AT 202163_S_AT 202279_AT 202325_S_AT 202428_X_AT 202657_S_AT 202798_AT 203250_AT 203497_AT 203667_AT 203675_AT 203781_AT 203831_AT 205133_S_AT 205644_S_AT 205849_S_AT 206074_S_AT 207335_X_AT 208442_S_AT 208863_S_AT 209095_AT 209348_S_…
HPA	skin 1; cells in granular layer[в‰ҐMedium]	HPA:0460182	false	0.000756297	3.12131	558	442	46	11019	1554868_S_AT 200679_X_AT 201138_S_AT 201223_S_AT 201300_S_AT 201408_AT 201518_AT 201595_S_AT 201754_AT 201757_AT 201930_AT 202657_S_AT 204132_S_AT 205644_S_AT 206074_S_AT 206445_S_AT 208808_S_AT 208864_S_AT 208993_S_AT 210962_S_AT 211257_X_AT 211989_AT 212040_AT 212594_AT 213251_AT 214512_S_AT 214709_S_AT 217915_S_AT 218386_X_AT 221771_S_AT 222035_S_AT 222231_S_AT 223067_AT 223455_AT 224129_S_AT …
HPA	spleen; cells in red pulp[в‰ҐMedium]	HPA:0530712	false	0.000857706	3.06666	3143	442	170	11019	1554078_S_AT 1554390_S_AT 1554868_S_AT 1567214_A_AT 1569594_A_AT 200050_AT 200679_X_AT 201039_S_AT 201138_S_AT 201223_S_AT 201266_AT 201280_S_AT 201369_S_AT 201376_S_AT 201518_AT 201569_S_AT 201595_S_AT 201699_AT 201754_AT 201757_AT 201930_AT 202060_AT 202097_AT 202138_X_AT 202163_S_AT 202279_AT 202325_S_AT 202770_S_AT 202798_AT 203087_S_AT 203250_AT 203497_AT 203667_AT 203675_AT 203781_AT 203831…
HPA	skin 2; cells in spinous layer[в‰ҐLow]	HPA:0471411	false	0.000865511	3.06273	871	442	63	11019	1554868_S_AT 1559946_S_AT 200679_X_AT 201091_S_AT 201138_S_AT 201223_S_AT 201304_AT 201408_AT 201518_AT 201595_S_AT 201754_AT 201757_AT 201930_AT 202298_AT 202657_S_AT 202776_AT 204132_S_AT 205133_S_AT 205484_AT 205644_S_AT 206074_S_AT 206445_S_AT 208808_S_AT 208864_S_AT 208993_S_AT 209330_S_AT 210538_S_AT 210962_S_AT 211257_X_AT 211989_AT 212040_AT 212594_AT 213251_AT 213746_S_AT 214512_S_AT 214…
HPA	skin 1; cells in spinous layer[в‰ҐLow]	HPA:0461411	false	0.000906082	3.04283	760	442	57	11019	1554868_S_AT 200679_X_AT 201091_S_AT 201138_S_AT 201223_S_AT 201304_AT 201408_AT 201518_AT 201595_S_AT 201754_AT 201757_AT 201930_AT 202657_S_AT 202776_AT 204132_S_AT 205484_AT 205644_S_AT 206074_S_AT 206445_S_AT 208808_S_AT 208864_S_AT 208993_S_AT 209330_S_AT 210538_S_AT 210962_S_AT 211257_X_AT 211989_AT 212040_AT 212594_AT 213251_AT 214512_S_AT 214709_S_AT 215716_S_AT 217915_S_AT 217973_AT 2181…
HPA	cerebral cortex; glial cells[High]	HPA:0100123	false	0.00100239	2.99896	744	442	56	11019	200050_AT 200679_X_AT 201039_S_AT 201138_S_AT 201376_S_AT 201384_S_AT 201518_AT 202097_AT 202163_S_AT 202279_AT 202325_S_AT 203076_S_AT 203250_AT 205133_S_AT 205849_S_AT 206074_S_AT 208863_S_AT 208993_S_AT 209301_AT 209330_S_AT 209348_S_AT 211257_X_AT 211989_AT 212040_AT 212289_AT 214709_S_AT 215359_X_AT 215693_X_AT 217987_AT 218871_X_AT 221771_S_AT 222826_AT 224068_X_AT 224662_AT 224781_S_AT 224…
HPA	tonsil; germinal center cells[High]	HPA:0600433	false	0.0010834	2.96521	1228	442	81	11019	1554078_S_AT 1554390_S_AT 1567214_A_AT 200050_AT 200679_X_AT 201569_S_AT 201637_S_AT 201678_S_AT 201713_S_AT 201754_AT 201930_AT 202279_AT 202325_S_AT 202798_AT 203250_AT 203302_AT 205133_S_AT 205668_AT 205849_S_AT 206074_S_AT 207655_S_AT 208442_S_AT 208808_S_AT 208993_S_AT 209095_AT 209330_S_AT 210538_S_AT 210776_X_AT 211989_AT 212040_AT 212132_AT 212415_AT 213251_AT 213475_S_AT 214512_S_AT 2147…
HPA	lymph node; non-germinal center cells[High]	HPA:0310443	false	0.00111743	2.95178	1209	442	80	11019	1554078_S_AT 1554390_S_AT 1554868_S_AT 200050_AT 200679_X_AT 201327_S_AT 201369_S_AT 201637_S_AT 201971_S_AT 202097_AT 202163_S_AT 202279_AT 202325_S_AT 202657_S_AT 203087_S_AT 205133_S_AT 205849_S_AT 206074_S_AT 207335_X_AT 207655_S_AT 208442_S_AT 208863_S_AT 208993_S_AT 209095_AT 209150_S_AT 209330_S_AT 210981_S_AT 211989_AT 212040_AT 212155_AT 212289_AT 212415_AT 212594_AT 214512_S_AT 214709_S…
HPA	hippocampus; glial cells[в‰ҐLow]	HPA:0250121	false	0.00113515	2.94495	4142	442	212	11019	1554078_S_AT 1554390_S_AT 1554868_S_AT 1567214_A_AT 1569594_A_AT 200050_AT 200679_X_AT 201039_S_AT 201138_S_AT 201223_S_AT 201266_AT 201280_S_AT 201304_AT 201327_S_AT 201363_S_AT 201376_S_AT 201384_S_AT 201518_AT 201568_AT 201569_S_AT 201595_S_AT 201637_S_AT 201687_S_AT 201699_AT 201713_S_AT 201754_AT 201971_S_AT 202060_AT 202097_AT 202146_AT 202163_S_AT 202279_AT 202325_S_AT 202425_X_AT 202428_X…
HPA	nasopharynx; respiratory epithelial cells[в‰ҐMedium]	HPA:0320102	false	0.00113898	2.94348	4773	442	238	11019	1554078_S_AT 1554390_S_AT 1554868_S_AT 1567214_A_AT 1569594_A_AT 200679_X_AT 200970_S_AT 201039_S_AT 201091_S_AT 201138_S_AT 201223_S_AT 201266_AT 201304_AT 201327_S_AT 201363_S_AT 201369_S_AT 201376_S_AT 201384_S_AT 201408_AT 201518_AT 201568_AT 201569_S_AT 201595_S_AT 201637_S_AT 201678_S_AT 201687_S_AT 201699_AT 201713_S_AT 201754_AT 201757_AT 201879_AT 201917_S_AT 201971_S_AT 202060_AT 202097…
HPA	vagina; squamous epithelial cells[в‰ҐMedium]	HPA:0620222	false	0.00121817	2.91429	4050	442	208	11019	1554078_S_AT 1554868_S_AT 1559078_AT 1567214_A_AT 1569594_A_AT 200050_AT 200679_X_AT 200970_S_AT 201039_S_AT 201091_S_AT 201138_S_AT 201223_S_AT 201304_AT 201327_S_AT 201376_S_AT 201518_AT 201568_AT 201569_S_AT 201595_S_AT 201637_S_AT 201678_S_AT 201687_S_AT 201699_AT 201713_S_AT 201754_AT 201757_AT 201879_AT 201930_AT 201971_S_AT 202060_AT 202097_AT 202163_S_AT 202233_S_AT 202279_AT 202298_AT 20…
HPA	caudate; neuronal cells[в‰ҐMedium]	HPA:0080132	false	0.00127221	2.89544	4124	442	211	11019	1554078_S_AT 1554868_S_AT 1567214_A_AT 200050_AT 201039_S_AT 201175_AT 201223_S_AT 201266_AT 201300_S_AT 201304_AT 201327_S_AT 201363_S_AT 201376_S_AT 201518_AT 201568_AT 201569_S_AT 201595_S_AT 201637_S_AT 201678_S_AT 201699_AT 201713_S_AT 201754_AT 201757_AT 201879_AT 201971_S_AT 202041_S_AT 202060_AT 202097_AT 202138_X_AT 202233_S_AT 202279_AT 202298_AT 202325_S_AT 202425_X_AT 202673_AT 202704…
HPA	skin 2; langerhans cells[в‰ҐLow]	HPA:0471461	false	0.00137616	2.86133	789	442	58	11019	1554868_S_AT 1559946_S_AT 200679_X_AT 201091_S_AT 201138_S_AT 201223_S_AT 201304_AT 201408_AT 201518_AT 201595_S_AT 201754_AT 201757_AT 202657_S_AT 202776_AT 202897_AT 204132_S_AT 205133_S_AT 205644_S_AT 206074_S_AT 206445_S_AT 208808_S_AT 208864_S_AT 208993_S_AT 209330_S_AT 210962_S_AT 211257_X_AT 211989_AT 212040_AT 212594_AT 213251_AT 214512_S_AT 214709_S_AT 215716_S_AT 217915_S_AT 218178_S_AT…
HPA	fallopian tube; glandular cells[High]	HPA:0210053	false	0.00142776	2.84534	1668	442	102	11019	1554868_S_AT 1567214_A_AT 200050_AT 200679_X_AT 201138_S_AT 201223_S_AT 201327_S_AT 201569_S_AT 201595_S_AT 201637_S_AT 201678_S_AT 201754_AT 202097_AT 202279_AT 202325_S_AT 203087_S_AT 203250_AT 203831_AT 204132_S_AT 205133_S_AT 205849_S_AT 206074_S_AT 207335_X_AT 208066_S_AT 208442_S_AT 208863_S_AT 208993_S_AT 209150_S_AT 209330_S_AT 210962_S_AT 211989_AT 212040_AT 212289_AT 212594_AT 213251_AT…
HPA	skin 1; langerhans cells[в‰ҐLow]	HPA:0461461	false	0.00144337	2.84062	716	442	54	11019	1554868_S_AT 200679_X_AT 201091_S_AT 201138_S_AT 201223_S_AT 201304_AT 201408_AT 201518_AT 201595_S_AT 201754_AT 201757_AT 202657_S_AT 202776_AT 204132_S_AT 205644_S_AT 206074_S_AT 206445_S_AT 208808_S_AT 208864_S_AT 208993_S_AT 209330_S_AT 210962_S_AT 211257_X_AT 211989_AT 212040_AT 212594_AT 213251_AT 214512_S_AT 214709_S_AT 215716_S_AT 217915_S_AT 218178_S_AT 218386_X_AT 221771_S_AT 222035_S_A…
HPA	skin 1; fibrohistiocytic cells[в‰ҐLow]	HPA:0461441	false	0.00146408	2.83443	885	442	63	11019	1554868_S_AT 1559946_S_AT 200679_X_AT 201138_S_AT 201223_S_AT 201280_S_AT 201304_AT 201408_AT 201518_AT 201595_S_AT 201754_AT 201757_AT 202298_AT 202657_S_AT 202776_AT 202888_S_AT 202897_AT 205644_S_AT 206445_S_AT 208808_S_AT 208864_S_AT 208993_S_AT 210962_S_AT 211257_X_AT 211989_AT 212040_AT 212594_AT 213251_AT 213746_S_AT 214259_S_AT 214433_S_AT 214512_S_AT 214709_S_AT 215049_X_AT 215716_S_AT 2…
HPA	skin 1; cells in spinous layer[в‰ҐMedium]	HPA:0461412	false	0.00163445	2.78663	592	442	47	11019	1554868_S_AT 200679_X_AT 201138_S_AT 201223_S_AT 201304_AT 201408_AT 201518_AT 201595_S_AT 201754_AT 201757_AT 201930_AT 202657_S_AT 202776_AT 204132_S_AT 205484_AT 205644_S_AT 206074_S_AT 206445_S_AT 208808_S_AT 208864_S_AT 208993_S_AT 210962_S_AT 211257_X_AT 211989_AT 212040_AT 212594_AT 213251_AT 214512_S_AT 214709_S_AT 217915_S_AT 218386_X_AT 221771_S_AT 222035_S_AT 222231_S_AT 223067_AT 2241…
HPA	skin 2; cells in spinous layer[в‰ҐMedium]	HPA:0471412	false	0.00168314	2.77388	683	442	52	11019	1554868_S_AT 200679_X_AT 201138_S_AT 201223_S_AT 201304_AT 201408_AT 201518_AT 201595_S_AT 201754_AT 201757_AT 201930_AT 202657_S_AT 202776_AT 204132_S_AT 205133_S_AT 205484_AT 205644_S_AT 206074_S_AT 206445_S_AT 208808_S_AT 208864_S_AT 208993_S_AT 209330_S_AT 210962_S_AT 211257_X_AT 211989_AT 212040_AT 212594_AT 213251_AT 213746_S_AT 214512_S_AT 214709_S_AT 217915_S_AT 221771_S_AT 222035_S_AT 22…
HPA	stomach 2; glandular cells[High]	HPA:0550053	false	0.00172005	2.76446	2431	442	137	11019	1554078_S_AT 1554868_S_AT 200050_AT 200679_X_AT 201138_S_AT 201218_AT 201304_AT 201327_S_AT 201376_S_AT 201384_S_AT 201568_AT 201569_S_AT 201637_S_AT 201713_S_AT 201754_AT 201757_AT 201930_AT 202163_S_AT 202233_S_AT 202279_AT 202298_AT 202325_S_AT 202460_S_AT 202657_S_AT 202673_AT 202918_S_AT 203250_AT 203371_S_AT 203667_AT 203675_AT 203781_AT 204484_AT 205133_S_AT 205849_S_AT 206074_S_AT 206445_…
HPA	salivary gland; glandular cells[в‰ҐMedium]	HPA:0420052	false	0.00180776	2.74286	4872	442	241	11019	1554078_S_AT 1554868_S_AT 1567214_A_AT 1569594_A_AT 200050_AT 200679_X_AT 201039_S_AT 201091_S_AT 201138_S_AT 201218_AT 201223_S_AT 201266_AT 201304_AT 201327_S_AT 201376_S_AT 201384_S_AT 201408_AT 201518_AT 201568_AT 201569_S_AT 201595_S_AT 201637_S_AT 201678_S_AT 201699_AT 201713_S_AT 201754_AT 201757_AT 201879_AT 201930_AT 202041_S_AT 202060_AT 202097_AT 202163_S_AT 202233_S_AT 202279_AT 20229…
HPA	cerebellum; cells in molecular layer[в‰ҐMedium]	HPA:0090192	false	0.00183966	2.73526	2792	442	153	11019	1554078_S_AT 1554390_S_AT 1554868_S_AT 1567214_A_AT 1569594_A_AT 200050_AT 201039_S_AT 201091_S_AT 201138_S_AT 201223_S_AT 201266_AT 201304_AT 201363_S_AT 201376_S_AT 201384_S_AT 201518_AT 201569_S_AT 201595_S_AT 201637_S_AT 201699_AT 201713_S_AT 201754_AT 201971_S_AT 202097_AT 202138_X_AT 202279_AT 202325_S_AT 202460_S_AT 202657_S_AT 203076_S_AT 203087_S_AT 203250_AT 203371_S_AT 203831_AT 204132…
HPA	placenta; decidual cells[High]	HPA:0380513	false	0.00209524	2.67877	1209	442	79	11019	1554078_S_AT 1559946_S_AT 200050_AT 200679_X_AT 201138_S_AT 201218_AT 201223_S_AT 201376_S_AT 201637_S_AT 202097_AT 202325_S_AT 202657_S_AT 203076_S_AT 203497_AT 204484_AT 205644_S_AT 208066_S_AT 208442_S_AT 208863_S_AT 208864_S_AT 208993_S_AT 209095_AT 209150_S_AT 209348_S_AT 210276_S_AT 210312_S_AT 211257_X_AT 212040_AT 214512_S_AT 214709_S_AT 215359_X_AT 215693_X_AT 217855_X_AT 218871_X_AT 219…
HPA	skin 2; cells in granular layer[в‰ҐMedium]	HPA:0470182	false	0.00210981	2.67576	562	442	45	11019	1554868_S_AT 201138_S_AT 201223_S_AT 201300_S_AT 201304_AT 201408_AT 201518_AT 201595_S_AT 201754_AT 201757_AT 202657_S_AT 204132_S_AT 205133_S_AT 205644_S_AT 206074_S_AT 206445_S_AT 208864_S_AT 208993_S_AT 209330_S_AT 211257_X_AT 211989_AT 212040_AT 212594_AT 213251_AT 214512_S_AT 214709_S_AT 217915_S_AT 221771_S_AT 222035_S_AT 223067_AT 223416_AT 223455_AT 224129_S_AT 224781_S_AT 225107_AT 2263…
HPA	pancreas; exocrine glandular cells[High]	HPA:0350473	false	0.00214484	2.66861	1960	442	115	11019	1554078_S_AT 1554868_S_AT 1567214_A_AT 200050_AT 200679_X_AT 201138_S_AT 201223_S_AT 201304_AT 201327_S_AT 201376_S_AT 201518_AT 201569_S_AT 201595_S_AT 201713_S_AT 201754_AT 201757_AT 202163_S_AT 202279_AT 202298_AT 202325_S_AT 202428_X_AT 202657_S_AT 202673_AT 202888_S_AT 202918_S_AT 203250_AT 203310_AT 203667_AT 203781_AT 204484_AT 205133_S_AT 205849_S_AT 207335_X_AT 208442_S_AT 208863_S_AT 20…
HPA	endometrium 2; cells in endometrial stroma[в‰ҐLow]	HPA:0170251	false	0.00235392	2.62821	3517	442	184	11019	1554078_S_AT 1554868_S_AT 1567214_A_AT 1569594_A_AT 200050_AT 200679_X_AT 201039_S_AT 201091_S_AT 201138_S_AT 201223_S_AT 201266_AT 201363_S_AT 201376_S_AT 201518_AT 201595_S_AT 201637_S_AT 201699_AT 201713_S_AT 201754_AT 201757_AT 201879_AT 201971_S_AT 202060_AT 202097_AT 202163_S_AT 202279_AT 202298_AT 202325_S_AT 202460_S_AT 202657_S_AT 202673_AT 202719_S_AT 202724_S_AT 202770_S_AT 202798_AT 2…
HPA	skin 1; endothelial cells[в‰ҐLow]	HPA:0460201	false	0.00237497	2.62434	841	442	60	11019	1553678_A_AT 1554868_S_AT 1559946_S_AT 200679_X_AT 201091_S_AT 201138_S_AT 201223_S_AT 201280_S_AT 201304_AT 201408_AT 201518_AT 201595_S_AT 201754_AT 201757_AT 202425_X_AT 202657_S_AT 202776_AT 204132_S_AT 205644_S_AT 206074_S_AT 206445_S_AT 208808_S_AT 208864_S_AT 208993_S_AT 210962_S_AT 211257_X_AT 211989_AT 212040_AT 212594_AT 213251_AT 213746_S_AT 214512_S_AT 214709_S_AT 215716_S_AT 216899_S…
HPA	skin 1; cells in basal layer[в‰ҐMedium]	HPA:0461392	false	0.00243204	2.61403	637	442	49	11019	1554868_S_AT 200679_X_AT 201091_S_AT 201138_S_AT 201223_S_AT 201304_AT 201408_AT 201518_AT 201595_S_AT 201754_AT 201757_AT 201930_AT 202657_S_AT 204132_S_AT 205644_S_AT 206074_S_AT 206445_S_AT 208808_S_AT 208864_S_AT 208993_S_AT 210962_S_AT 211257_X_AT 211989_AT 212040_AT 212594_AT 213251_AT 213746_S_AT 214512_S_AT 214709_S_AT 215716_S_AT 217915_S_AT 217973_AT 221771_S_AT 222035_S_AT 222231_S_AT …
HPA	duodenum; glandular cells[High]	HPA:0150053	false	0.00251042	2.60025	2604	442	144	11019	1554078_S_AT 1554868_S_AT 1567214_A_AT 1569594_A_AT 200050_AT 200970_S_AT 201039_S_AT 201223_S_AT 201304_AT 201327_S_AT 201376_S_AT 201518_AT 201568_AT 201569_S_AT 201595_S_AT 201637_S_AT 201713_S_AT 201754_AT 201757_AT 202097_AT 202233_S_AT 202279_AT 202298_AT 202325_S_AT 202657_S_AT 202673_AT 202918_S_AT 203250_AT 203371_S_AT 203497_AT 203675_AT 203781_AT 203831_AT 204132_S_AT 205849_S_AT 20733…
HPA	skin 2; fibrohistiocytic cells[в‰ҐLow]	HPA:0471441	false	0.00293513	2.53237	1021	442	69	11019	1554868_S_AT 1559946_S_AT 200679_X_AT 201091_S_AT 201138_S_AT 201223_S_AT 201280_S_AT 201304_AT 201408_AT 201518_AT 201595_S_AT 201754_AT 201757_AT 201930_AT 202298_AT 202657_S_AT 202776_AT 202888_S_AT 202897_AT 204132_S_AT 205644_S_AT 208808_S_AT 208864_S_AT 208993_S_AT 209330_S_AT 210538_S_AT 210962_S_AT 211257_X_AT 211989_AT 212040_AT 212594_AT 213251_AT 213746_S_AT 214259_S_AT 214433_S_AT 214…
HPA	cerebellum; cells in granular layer[High]	HPA:0090183	false	0.0030181	2.52027	753	442	55	11019	1554078_S_AT 1567214_A_AT 200050_AT 201138_S_AT 201304_AT 201376_S_AT 201518_AT 201568_AT 201569_S_AT 201754_AT 202097_AT 202233_S_AT 202279_AT 202298_AT 202325_S_AT 202798_AT 203250_AT 203497_AT 205133_S_AT 205644_S_AT 205849_S_AT 207335_X_AT 208863_S_AT 208993_S_AT 209095_AT 209330_S_AT 211257_X_AT 211989_AT 212040_AT 212442_S_AT 213846_AT 214875_X_AT 215693_X_AT 217987_AT 222203_S_AT 222436_S_…
HPA	skin 2; cells in granular layer[в‰ҐLow]	HPA:0470181	false	0.00343886	2.46358	719	442	53	11019	1554868_S_AT 201091_S_AT 201138_S_AT 201223_S_AT 201300_S_AT 201304_AT 201408_AT 201518_AT 201595_S_AT 201754_AT 201757_AT 202657_S_AT 204132_S_AT 205133_S_AT 205644_S_AT 206074_S_AT 206445_S_AT 208864_S_AT 208993_S_AT 209330_S_AT 210962_S_AT 211257_X_AT 211989_AT 212040_AT 212594_AT 213251_AT 214512_S_AT 214709_S_AT 215716_S_AT 217915_S_AT 218178_S_AT 218386_X_AT 221771_S_AT 222035_S_AT 223067_A…
HPA	skin 2; fibrohistiocytic cells[в‰ҐMedium]	HPA:0471442	false	0.00356114	2.44841	833	442	59	11019	1554868_S_AT 200679_X_AT 201091_S_AT 201138_S_AT 201223_S_AT 201280_S_AT 201304_AT 201408_AT 201518_AT 201595_S_AT 201754_AT 201757_AT 201930_AT 202657_S_AT 202888_S_AT 202897_AT 204132_S_AT 205644_S_AT 208808_S_AT 208864_S_AT 208993_S_AT 209330_S_AT 210962_S_AT 211257_X_AT 211989_AT 212040_AT 212594_AT 213251_AT 213746_S_AT 214512_S_AT 214709_S_AT 215049_X_AT 215716_S_AT 216899_S_AT 218178_S_AT …
HPA	skin 2; melanocytes[в‰ҐLow]	HPA:0470671	false	0.00418228	2.37859	724	442	53	11019	1554868_S_AT 1559946_S_AT 200679_X_AT 201091_S_AT 201138_S_AT 201223_S_AT 201304_AT 201408_AT 201518_AT 201595_S_AT 201754_AT 201757_AT 202657_S_AT 202776_AT 202897_AT 204132_S_AT 205133_S_AT 205644_S_AT 206074_S_AT 208808_S_AT 208993_S_AT 209330_S_AT 210962_S_AT 211257_X_AT 211989_AT 212040_AT 213251_AT 214259_S_AT 214709_S_AT 217915_S_AT 218178_S_AT 221771_S_AT 222035_S_AT 222231_S_AT 223416_AT…
HPA	skin 1; langerhans cells[в‰ҐMedium]	HPA:0461462	false	0.0043328	2.36323	578	442	45	11019	1554868_S_AT 200679_X_AT 201138_S_AT 201223_S_AT 201304_AT 201408_AT 201518_AT 201595_S_AT 201754_AT 201757_AT 202657_S_AT 202776_AT 204132_S_AT 205644_S_AT 206074_S_AT 206445_S_AT 208808_S_AT 208864_S_AT 208993_S_AT 210962_S_AT 211257_X_AT 211989_AT 212040_AT 212594_AT 213251_AT 214512_S_AT 214709_S_AT 217915_S_AT 218386_X_AT 221771_S_AT 222035_S_AT 222231_S_AT 223067_AT 224129_S_AT 224781_S_AT …
HPA	lung; macrophages[в‰ҐMedium]	HPA:0300412	false	0.00444194	2.35243	4898	442	240	11019	1554078_S_AT 1554390_S_AT 1554868_S_AT 1567214_A_AT 1569594_A_AT 200050_AT 200679_X_AT 200970_S_AT 201039_S_AT 201091_S_AT 201138_S_AT 201175_AT 201223_S_AT 201266_AT 201280_S_AT 201304_AT 201327_S_AT 201363_S_AT 201369_S_AT 201376_S_AT 201384_S_AT 201408_AT 201518_AT 201569_S_AT 201595_S_AT 201637_S_AT 201699_AT 201713_S_AT 201754_AT 201757_AT 201879_AT 201971_S_AT 202041_S_AT 202060_AT 202097_A…
HPA	prostate; glandular cells[High]	HPA:0390053	false	0.00459309	2.33789	1337	442	84	11019	1554078_S_AT 200679_X_AT 201138_S_AT 201223_S_AT 201376_S_AT 201637_S_AT 201687_S_AT 201713_S_AT 201754_AT 201757_AT 202041_S_AT 202163_S_AT 202279_AT 202325_S_AT 202428_X_AT 202918_S_AT 203076_S_AT 203250_AT 204484_AT 205133_S_AT 205644_S_AT 205849_S_AT 206074_S_AT 207335_X_AT 207812_S_AT 208442_S_AT 208993_S_AT 209150_S_AT 209330_S_AT 209348_S_AT 209623_AT 210312_S_AT 211989_AT 212040_AT 212289…
HPA	esophagus; squamous epithelial cells[High]	HPA:0190223	false	0.00491738	2.30827	1652	442	99	11019	1554078_S_AT 1554868_S_AT 200679_X_AT 201138_S_AT 201223_S_AT 201304_AT 201327_S_AT 201569_S_AT 201595_S_AT 201637_S_AT 201678_S_AT 201754_AT 201757_AT 202097_AT 202163_S_AT 202233_S_AT 202279_AT 202325_S_AT 202657_S_AT 202770_S_AT 202918_S_AT 203250_AT 203497_AT 205133_S_AT 205849_S_AT 206074_S_AT 207335_X_AT 208066_S_AT 208442_S_AT 208863_S_AT 208993_S_AT 209095_AT 209330_S_AT 210312_S_AT 21198…
HPA	cerebellum; cells in granular layer[в‰ҐMedium]	HPA:0090182	false	0.00497337	2.30335	2931	442	157	11019	1554078_S_AT 1554868_S_AT 1567214_A_AT 1569594_A_AT 200050_AT 201138_S_AT 201266_AT 201304_AT 201376_S_AT 201384_S_AT 201518_AT 201568_AT 201569_S_AT 201595_S_AT 201637_S_AT 201699_AT 201713_S_AT 201754_AT 202060_AT 202097_AT 202209_AT 202233_S_AT 202279_AT 202298_AT 202325_S_AT 202657_S_AT 202673_AT 202798_AT 202918_S_AT 203076_S_AT 203250_AT 203310_AT 203371_S_AT 203497_AT 203667_AT 203831_AT 2…
HPA	skin 2; melanocytes[в‰ҐMedium]	HPA:0470672	false	0.0059161	2.22796	640	442	48	11019	1554868_S_AT 200679_X_AT 201091_S_AT 201138_S_AT 201223_S_AT 201304_AT 201408_AT 201518_AT 201595_S_AT 201754_AT 201757_AT 202657_S_AT 202897_AT 204132_S_AT 205133_S_AT 205644_S_AT 206074_S_AT 208808_S_AT 208993_S_AT 209330_S_AT 210962_S_AT 211257_X_AT 211989_AT 212040_AT 213251_AT 214259_S_AT 214709_S_AT 218178_S_AT 221771_S_AT 222035_S_AT 222231_S_AT 223416_AT 224129_S_AT 224576_AT 224781_S_AT …
HPA	liver; cholangiocytes[в‰ҐMedium]	HPA:0291162	false	0.00661902	2.17921	1964	442	113	11019	1554390_S_AT 200050_AT 200679_X_AT 201138_S_AT 201223_S_AT 201266_AT 201327_S_AT 201518_AT 201569_S_AT 201595_S_AT 201754_AT 202097_AT 202146_AT 202163_S_AT 202279_AT 202325_S_AT 202460_S_AT 202657_S_AT 202888_S_AT 203076_S_AT 203250_AT 203667_AT 204132_S_AT 204484_AT 205133_S_AT 205644_S_AT 205849_S_AT 206074_S_AT 207335_X_AT 208442_S_AT 208863_S_AT 208935_S_AT 208993_S_AT 209095_AT 209301_AT 20…
HPA	skin 2; langerhans cells[в‰ҐMedium]	HPA:0471462	false	0.00681783	2.16635	662	442	49	11019	1554868_S_AT 200679_X_AT 201138_S_AT 201223_S_AT 201304_AT 201408_AT 201518_AT 201595_S_AT 201754_AT 201757_AT 202657_S_AT 202776_AT 202897_AT 204132_S_AT 205133_S_AT 205644_S_AT 206074_S_AT 206445_S_AT 208808_S_AT 208864_S_AT 208993_S_AT 209330_S_AT 210962_S_AT 211257_X_AT 211989_AT 212040_AT 212594_AT 213251_AT 214512_S_AT 214709_S_AT 217915_S_AT 221771_S_AT 222035_S_AT 222231_S_AT 223067_AT 22…
HPA	heart muscle; cardiomyocytes[в‰ҐMedium]	HPA:0241102	false	0.00889817	2.0507	4376	442	217	11019	1554078_S_AT 1567214_A_AT 1569594_A_AT 200050_AT 200679_X_AT 200970_S_AT 201039_S_AT 201091_S_AT 201138_S_AT 201175_AT 201223_S_AT 201266_AT 201304_AT 201327_S_AT 201369_S_AT 201384_S_AT 201518_AT 201568_AT 201569_S_AT 201595_S_AT 201637_S_AT 201699_AT 201713_S_AT 201754_AT 201757_AT 201879_AT 201930_AT 202097_AT 202163_S_AT 202233_S_AT 202279_AT 202298_AT 202325_S_AT 202428_X_AT 202657_S_AT 2026…
HPA	placenta; trophoblastic cells[High]	HPA:0380523	false	0.00921614	2.03545	1935	442	111	11019	1567214_A_AT 1569594_A_AT 200050_AT 200679_X_AT 201039_S_AT 201138_S_AT 201223_S_AT 201266_AT 201327_S_AT 201376_S_AT 201595_S_AT 201637_S_AT 201687_S_AT 201879_AT 202097_AT 202163_S_AT 202279_AT 202325_S_AT 202657_S_AT 202673_AT 202918_S_AT 203087_S_AT 203497_AT 203667_AT 203781_AT 205849_S_AT 206074_S_AT 208442_S_AT 208691_AT 208863_S_AT 208993_S_AT 209095_AT 209348_S_AT 210312_S_AT 210962_S_AT…
HPA	oral mucosa; squamous epithelial cells[в‰ҐMedium]	HPA:0330222	false	0.00989628	2.00453	4358	442	216	11019	1554078_S_AT 1554868_S_AT 1559078_AT 1567214_A_AT 1569594_A_AT 200050_AT 200679_X_AT 201039_S_AT 201091_S_AT 201138_S_AT 201175_AT 201223_S_AT 201304_AT 201327_S_AT 201363_S_AT 201376_S_AT 201408_AT 201518_AT 201568_AT 201569_S_AT 201595_S_AT 201637_S_AT 201678_S_AT 201687_S_AT 201699_AT 201713_S_AT 201754_AT 201757_AT 201879_AT 201930_AT 201971_S_AT 202060_AT 202097_AT 202138_X_AT 202146_AT 2021…
HPA	caudate; glial cells[в‰ҐLow]	HPA:0080121	false	0.0099333	2.00291	4577	442	225	11019	1554390_S_AT 1554868_S_AT 1567214_A_AT 1569594_A_AT 200050_AT 200679_X_AT 201039_S_AT 201091_S_AT 201138_S_AT 201223_S_AT 201266_AT 201280_S_AT 201300_S_AT 201304_AT 201363_S_AT 201376_S_AT 201384_S_AT 201518_AT 201568_AT 201569_S_AT 201595_S_AT 201637_S_AT 201687_S_AT 201699_AT 201713_S_AT 201754_AT 201757_AT 201971_S_AT 202060_AT 202097_AT 202146_AT 202163_S_AT 202279_AT 202325_S_AT 202428_X_AT…
HPA	lung; alveolar cells type II[в‰ҐLow]	HPA:0301371	false	0.0101775	1.99236	1533	442	92	11019	1554868_S_AT 1567214_A_AT 200050_AT 201091_S_AT 201138_S_AT 201223_S_AT 201408_AT 201518_AT 201569_S_AT 201595_S_AT 201713_S_AT 201754_AT 201757_AT 201930_AT 202060_AT 202097_AT 202325_S_AT 202428_X_AT 202657_S_AT 203250_AT 203781_AT 204132_S_AT 206074_S_AT 207335_X_AT 208003_S_AT 208066_S_AT 208442_S_AT 208808_S_AT 208863_S_AT 208864_S_AT 208993_S_AT 209095_AT 209229_S_AT 209330_S_AT 209623_AT 2…
HPA	kidney; cells in tubules[High]	HPA:0270363	false	0.0108774	1.96347	2161	442	121	11019	1554078_S_AT 1554868_S_AT 200679_X_AT 201138_S_AT 201223_S_AT 201266_AT 201363_S_AT 201376_S_AT 201568_AT 201569_S_AT 201713_S_AT 202097_AT 202163_S_AT 202233_S_AT 202279_AT 202428_X_AT 202460_S_AT 202673_AT 202798_AT 202918_S_AT 203250_AT 203371_S_AT 203781_AT 204484_AT 205849_S_AT 208066_S_AT 208442_S_AT 208863_S_AT 208864_S_AT 208993_S_AT 209095_AT 209150_S_AT 209330_S_AT 209348_S_AT 210276_S_…
HPA	skin 2; endothelial cells[в‰ҐMedium]	HPA:0470202	false	0.0109945	1.95882	637	442	47	11019	1554868_S_AT 200679_X_AT 201138_S_AT 201223_S_AT 201408_AT 201518_AT 201595_S_AT 201754_AT 201757_AT 202657_S_AT 202776_AT 204132_S_AT 205644_S_AT 206445_S_AT 208808_S_AT 208993_S_AT 210962_S_AT 211257_X_AT 211989_AT 212040_AT 212594_AT 213251_AT 213746_S_AT 214512_S_AT 214709_S_AT 215716_S_AT 218711_S_AT 221771_S_AT 222035_S_AT 223067_AT 223455_AT 224129_S_AT 224576_AT 224781_S_AT 225107_AT 2263…
HPA	kidney; cells in glomeruli[в‰ҐMedium]	HPA:0270352	false	0.0116921	1.93211	3090	442	162	11019	1553678_A_AT 1554078_S_AT 1554390_S_AT 1554868_S_AT 1567214_A_AT 1569594_A_AT 200050_AT 200679_X_AT 201039_S_AT 201091_S_AT 201138_S_AT 201223_S_AT 201266_AT 201304_AT 201369_S_AT 201376_S_AT 201518_AT 201569_S_AT 201637_S_AT 201678_S_AT 201699_AT 201757_AT 201879_AT 201971_S_AT 202060_AT 202097_AT 202146_AT 202279_AT 202325_S_AT 202657_S_AT 202673_AT 202704_AT 202897_AT 203076_S_AT 203250_AT 203…
HPA	skin 1; Langerhans[в‰ҐLow]	HPA:0460641	false	0.0123314	1.90899	3962	442	199	11019	1554078_S_AT 1559078_AT 1567214_A_AT 1569594_A_AT 200050_AT 200970_S_AT 201039_S_AT 201266_AT 201327_S_AT 201363_S_AT 201369_S_AT 201376_S_AT 201569_S_AT 201637_S_AT 201678_S_AT 201687_S_AT 201699_AT 201713_S_AT 201879_AT 201971_S_AT 202060_AT 202097_AT 202138_X_AT 202146_AT 202163_S_AT 202233_S_AT 202279_AT 202325_S_AT 202428_X_AT 202673_AT 202704_AT 202719_S_AT 202724_S_AT 202770_S_AT 202918_S_…
HPA	hippocampus; neuronal cells[в‰ҐMedium]	HPA:0250132	false	0.0132039	1.8793	4230	442	210	11019	1554078_S_AT 1554390_S_AT 1559078_AT 1567214_A_AT 1569594_A_AT 200050_AT 201039_S_AT 201091_S_AT 201138_S_AT 201175_AT 201223_S_AT 201266_AT 201304_AT 201327_S_AT 201363_S_AT 201376_S_AT 201518_AT 201568_AT 201569_S_AT 201595_S_AT 201637_S_AT 201678_S_AT 201699_AT 201713_S_AT 201754_AT 201757_AT 201879_AT 201971_S_AT 202041_S_AT 202060_AT 202097_AT 202138_X_AT 202146_AT 202233_S_AT 202279_AT 2022…
HPA	endometrium 2; cells in endometrial stroma[в‰ҐMedium]	HPA:0170252	false	0.013728	1.86239	1801	442	104	11019	1554868_S_AT 1567214_A_AT 1569594_A_AT 200050_AT 200679_X_AT 201091_S_AT 201138_S_AT 201223_S_AT 201266_AT 201376_S_AT 201518_AT 201595_S_AT 201637_S_AT 201699_AT 201971_S_AT 202097_AT 202325_S_AT 202657_S_AT 203076_S_AT 203250_AT 203667_AT 204132_S_AT 205133_S_AT 205644_S_AT 205690_S_AT 205849_S_AT 208066_S_AT 208442_S_AT 208863_S_AT 208864_S_AT 208993_S_AT 209150_S_AT 209330_S_AT 210312_S_AT 21…
HPA	hippocampus; glial cells[в‰ҐMedium]	HPA:0250122	false	0.0162851	1.78821	2004	442	113	11019	1554078_S_AT 1567214_A_AT 1569594_A_AT 200050_AT 200679_X_AT 201138_S_AT 201223_S_AT 201376_S_AT 201384_S_AT 201518_AT 201637_S_AT 202060_AT 202097_AT 202279_AT 202325_S_AT 202428_X_AT 202918_S_AT 203076_S_AT 203087_S_AT 203250_AT 203371_S_AT 205133_S_AT 205644_S_AT 205690_S_AT 205849_S_AT 206074_S_AT 208003_S_AT 208442_S_AT 208863_S_AT 208935_S_AT 208993_S_AT 209095_AT 209301_AT 209330_S_AT 2093…
HPA	cerebellum; Purkinje cells[High]	HPA:0090163	false	0.0163452	1.78661	1552	442	92	11019	1554078_S_AT 1554868_S_AT 1559078_AT 1567214_A_AT 1569594_A_AT 201138_S_AT 201223_S_AT 201266_AT 201304_AT 201518_AT 201568_AT 201569_S_AT 201595_S_AT 201637_S_AT 201713_S_AT 201754_AT 201879_AT 201971_S_AT 202097_AT 202279_AT 202298_AT 202325_S_AT 202657_S_AT 203087_S_AT 203250_AT 203371_S_AT 203781_AT 203831_AT 205133_S_AT 205644_S_AT 205849_S_AT 207335_X_AT 208863_S_AT 208993_S_AT 209095_AT 21…
HPA	pancreas; pancreatic endocrine cells[High]	HPA:0351183	false	0.0178212	1.74906	802	442	55	11019	1554078_S_AT 200050_AT 200970_S_AT 201138_S_AT 201223_S_AT 201376_S_AT 201637_S_AT 201713_S_AT 202279_AT 202325_S_AT 203250_AT 205133_S_AT 207335_X_AT 208863_S_AT 208993_S_AT 211989_AT 212040_AT 212594_AT 214512_S_AT 214709_S_AT 214875_X_AT 215693_X_AT 217872_AT 217987_AT 218386_X_AT 222103_AT 222745_S_AT 223160_S_AT 224068_X_AT 224480_S_AT 224570_S_AT 224671_AT 225107_AT 226277_AT 227277_AT 2318…
HPA	stomach 1; glandular cells[High]	HPA:0540053	false	0.0183172	1.73714	2453	442	133	11019	1554078_S_AT 1554868_S_AT 200050_AT 200679_X_AT 201138_S_AT 201223_S_AT 201304_AT 201376_S_AT 201384_S_AT 201518_AT 201568_AT 201569_S_AT 201713_S_AT 201754_AT 201757_AT 202097_AT 202163_S_AT 202233_S_AT 202279_AT 202298_AT 202325_S_AT 202460_S_AT 202657_S_AT 202673_AT 202798_AT 202918_S_AT 203250_AT 203371_S_AT 203667_AT 203675_AT 203781_AT 205133_S_AT 205849_S_AT 206074_S_AT 206445_S_AT 207335_…
HPA	seminal vesicle; glandular cells[в‰ҐMedium]	HPA:0430052	false	0.020404	1.69028	5238	442	250	11019	1554078_S_AT 1554390_S_AT 1554868_S_AT 1567214_A_AT 1569594_A_AT 200050_AT 201039_S_AT 201091_S_AT 201138_S_AT 201223_S_AT 201266_AT 201304_AT 201327_S_AT 201363_S_AT 201376_S_AT 201384_S_AT 201408_AT 201518_AT 201568_AT 201569_S_AT 201595_S_AT 201637_S_AT 201699_AT 201713_S_AT 201754_AT 201757_AT 201879_AT 202041_S_AT 202097_AT 202146_AT 202163_S_AT 202233_S_AT 202279_AT 202298_AT 202325_S_AT 20…
HPA	soft tissue 1	HPA:0500000	false	0.0204072	1.69022	5363	442	255	11019	1553678_A_AT 1554078_S_AT 1554390_S_AT 1554868_S_AT 1567214_A_AT 1569594_A_AT 200050_AT 200679_X_AT 201138_S_AT 201218_AT 201223_S_AT 201266_AT 201280_S_AT 201304_AT 201327_S_AT 201363_S_AT 201376_S_AT 201384_S_AT 201408_AT 201518_AT 201569_S_AT 201595_S_AT 201637_S_AT 201678_S_AT 201687_S_AT 201699_AT 201713_S_AT 201754_AT 201757_AT 201879_AT 201971_S_AT 202060_AT 202097_AT 202138_X_AT 202146_AT…
HPA	lymph node; germinal center cells[High]	HPA:0310433	false	0.0207622	1.68273	944	442	62	11019	1554078_S_AT 1554390_S_AT 200050_AT 200679_X_AT 201678_S_AT 201713_S_AT 201754_AT 201930_AT 201971_S_AT 202097_AT 202279_AT 202325_S_AT 203087_S_AT 203250_AT 203302_AT 205133_S_AT 205484_AT 205668_AT 205671_S_AT 205849_S_AT 208442_S_AT 208808_S_AT 208863_S_AT 209095_AT 209330_S_AT 210776_X_AT 212040_AT 212289_AT 212415_AT 213251_AT 213475_S_AT 214875_X_AT 215359_X_AT 217730_AT 217872_AT 217887_S_…
HPA	adipose tissue; adipocytes[в‰ҐMedium]	HPA:0010012	false	0.0208081	1.68177	2236	442	123	11019	1554868_S_AT 1559946_S_AT 1567214_A_AT 200050_AT 200679_X_AT 201091_S_AT 201138_S_AT 201223_S_AT 201304_AT 201327_S_AT 201369_S_AT 201376_S_AT 201384_S_AT 201518_AT 201568_AT 201595_S_AT 201678_S_AT 201687_S_AT 201699_AT 201713_S_AT 201971_S_AT 202060_AT 202138_X_AT 202163_S_AT 202428_X_AT 202657_S_AT 202673_AT 202719_S_AT 203076_S_AT 203250_AT 203667_AT 203781_AT 203831_AT 204132_S_AT 205133_S_A…
HPA	skin 1; lymphocytes[в‰ҐLow]	HPA:0461471	false	0.0220018	1.65754	712	442	50	11019	1554868_S_AT 1559946_S_AT 200679_X_AT 201138_S_AT 201223_S_AT 201280_S_AT 201304_AT 201408_AT 201518_AT 201595_S_AT 201754_AT 202657_S_AT 202776_AT 204132_S_AT 205133_S_AT 205484_AT 205644_S_AT 206074_S_AT 206445_S_AT 208808_S_AT 208993_S_AT 210962_S_AT 211257_X_AT 211989_AT 212040_AT 212594_AT 213251_AT 213746_S_AT 214512_S_AT 214709_S_AT 217915_S_AT 218178_S_AT 218386_X_AT 221771_S_AT 222035_S_…
HPA	skin 2; lymphocytes[High]	HPA:0471473	false	0.0245245	1.6104	456	442	36	11019	200679_X_AT 201138_S_AT 201223_S_AT 201518_AT 201595_S_AT 201754_AT 201930_AT 202657_S_AT 204132_S_AT 205484_AT 205644_S_AT 206074_S_AT 208808_S_AT 208993_S_AT 211989_AT 212040_AT 212594_AT 213746_S_AT 214512_S_AT 218178_S_AT 221771_S_AT 222035_S_AT 222231_S_AT 224576_AT 224781_S_AT 225107_AT 227200_AT 227277_AT 235444_AT 1555068_AT 208572_AT 209334_S_AT 211444_AT 217263_X_AT 235220_AT 239900_X_AT
HPA	lung; alveolar cells type I[в‰ҐLow]	HPA:0301361	false	0.0251086	1.60018	1091	442	69	11019	1554868_S_AT 1567214_A_AT 200050_AT 201091_S_AT 201138_S_AT 201408_AT 201518_AT 201569_S_AT 201595_S_AT 201930_AT 202097_AT 202325_S_AT 202657_S_AT 203250_AT 204132_S_AT 205644_S_AT 206074_S_AT 208003_S_AT 208066_S_AT 208442_S_AT 208863_S_AT 208864_S_AT 208993_S_AT 209330_S_AT 210962_S_AT 211257_X_AT 211989_AT 212264_S_AT 212594_AT 212721_AT 213251_AT 214433_S_AT 214512_S_AT 214709_S_AT 215359_X_…
HPA	breast; glandular cells[High]	HPA:0050053	false	0.0331825	1.47909	1349	442	81	11019	1554078_S_AT 1567214_A_AT 200050_AT 200679_X_AT 201138_S_AT 201223_S_AT 201304_AT 201376_S_AT 201569_S_AT 201595_S_AT 201637_S_AT 201754_AT 201757_AT 201930_AT 202097_AT 202163_S_AT 202279_AT 202325_S_AT 202428_X_AT 203076_S_AT 203250_AT 203497_AT 203831_AT 204132_S_AT 205133_S_AT 205849_S_AT 206074_S_AT 206445_S_AT 207335_X_AT 208442_S_AT 208863_S_AT 208993_S_AT 209095_AT 210276_S_AT 210312_S_AT…
HPA	skin 1; lymphocytes[High]	HPA:0461473	false	0.0364497	1.43831	394	442	32	11019	200679_X_AT 201138_S_AT 201223_S_AT 201280_S_AT 201304_AT 201518_AT 201754_AT 202657_S_AT 204132_S_AT 205484_AT 205644_S_AT 206074_S_AT 208808_S_AT 208993_S_AT 211989_AT 212040_AT 212594_AT 213746_S_AT 214512_S_AT 214709_S_AT 221771_S_AT 222035_S_AT 224781_S_AT 225107_AT 227200_AT 235444_AT 208572_AT 209334_S_AT 211444_AT 217263_X_AT 235220_AT 239900_X_AT
HPA	cervix; squamous epithelial cells[в‰ҐMedium]	HPA:0630222	false	0.0452457	1.34442	3730	442	186	11019	1554078_S_AT 1554868_S_AT 1559078_AT 1569594_A_AT 200050_AT 200679_X_AT 201039_S_AT 201138_S_AT 201223_S_AT 201304_AT 201327_S_AT 201376_S_AT 201408_AT 201518_AT 201569_S_AT 201595_S_AT 201637_S_AT 201678_S_AT 201687_S_AT 201699_AT 201713_S_AT 201754_AT 201757_AT 201930_AT 202060_AT 202097_AT 202233_S_AT 202279_AT 202298_AT 202325_S_AT 202657_S_AT 202673_AT 202704_AT 202770_S_AT 202918_S_AT 20307…
HPA	tonsil; non-germinal center cells[High]	HPA:0600443	false	0.0469008	1.32882	1321	442	79	11019	1554078_S_AT 1554390_S_AT 200050_AT 200679_X_AT 201138_S_AT 201369_S_AT 201569_S_AT 201971_S_AT 202163_S_AT 202279_AT 202325_S_AT 202657_S_AT 202798_AT 203087_S_AT 203250_AT 205133_S_AT 205668_AT 205671_S_AT 205849_S_AT 206074_S_AT 207335_X_AT 207655_S_AT 208442_S_AT 208863_S_AT 208993_S_AT 209095_AT 209330_S_AT 210312_S_AT 210981_S_AT 211989_AT 212040_AT 212415_AT 212594_AT 213475_S_AT 214709_S_…
CORUM	HUSH complex	CORUM:6891	false	0.0497021	1.30363	3	185	3	3383	209285_S_AT 221771_S_AT 234459_AT

## Sheet: GSE18123_0,01
source	term_name	term_id	highlighted	adjusted_p_value	negative_log10_of_adjusted_p_value	term_size	query_size	intersection_size	effective_domain_size	intersections
GO:MF	protein binding	GO:0005515	true	1.3555e-12	11.8679	14838	590	511	20212	1552701_A_AT 1553678_A_AT 1553979_AT 1554021_A_AT 1554078_S_AT 1554390_S_AT 1554868_S_AT 1555756_A_AT 1559078_AT 1559946_S_AT 1567214_A_AT 1568763_S_AT 200050_AT 200679_X_AT 200942_S_AT 200970_S_AT 201039_S_AT 201091_S_AT 201138_S_AT 201175_AT 201218_AT 201223_S_AT 201266_AT 201280_S_AT 201300_S_AT 201304_AT 201327_S_AT 201363_S_AT 201369_S_AT 201376_S_AT 201384_S_AT 201408_AT 201483_S_AT 201518_…
GO:MF	small molecule binding	GO:0036094	true	1.08125e-06	5.96608	6357	590	253	20212	1553678_A_AT 1553979_AT 1554021_A_AT 1554078_S_AT 1554390_S_AT 1555756_A_AT 1559078_AT 1559946_S_AT 1568763_S_AT 200050_AT 201218_AT 201266_AT 201300_S_AT 201327_S_AT 201369_S_AT 201384_S_AT 201408_AT 201483_S_AT 201595_S_AT 201699_AT 201713_S_AT 201879_AT 201898_S_AT 201930_AT 201971_S_AT 202097_AT 202163_S_AT 202171_AT 202425_X_AT 202428_X_AT 202574_S_AT 202673_AT 202719_S_AT 202798_AT 202888_S…
GO:MF	ion binding	GO:0043167	false	1.29316e-06	5.88835	6146	590	246	20212	1553678_A_AT 1553979_AT 1554021_A_AT 1554078_S_AT 1554390_S_AT 1555756_A_AT 1559078_AT 1559946_S_AT 1568763_S_AT 200050_AT 201266_AT 201300_S_AT 201327_S_AT 201369_S_AT 201384_S_AT 201408_AT 201483_S_AT 201595_S_AT 201699_AT 201713_S_AT 201879_AT 201898_S_AT 201930_AT 201971_S_AT 202097_AT 202163_S_AT 202171_AT 202425_X_AT 202428_X_AT 202574_S_AT 202673_AT 202719_S_AT 202798_AT 202888_S_AT 202918…
GO:MF	molecular adaptor activity	GO:0060090	true	3.13674e-06	5.50352	1136	590	69	20212	1559078_AT 1559946_S_AT 1568763_S_AT 200679_X_AT 200942_S_AT 201218_AT 201280_S_AT 201300_S_AT 201518_AT 201637_S_AT 201699_AT 202097_AT 202138_X_AT 202460_S_AT 202657_S_AT 202704_AT 202824_S_AT 203497_AT 205690_S_AT 206074_S_AT 207655_S_AT 208808_S_AT 208946_S_AT 209014_AT 209049_S_AT 210962_S_AT 211989_AT 212124_AT 212209_AT 212415_AT 214512_S_AT 215012_AT 217729_S_AT 217750_S_AT 217872_AT 2179…
GO:MF	protein-macromolecule adaptor activity	GO:0030674	false	7.42997e-06	5.12901	947	590	60	20212	1559078_AT 1559946_S_AT 1568763_S_AT 200679_X_AT 200942_S_AT 201218_AT 201280_S_AT 201300_S_AT 201637_S_AT 201699_AT 202097_AT 202460_S_AT 202657_S_AT 202704_AT 202824_S_AT 203497_AT 205690_S_AT 206074_S_AT 207655_S_AT 208808_S_AT 208946_S_AT 209014_AT 209049_S_AT 211989_AT 212124_AT 212209_AT 214512_S_AT 215012_AT 217729_S_AT 217872_AT 218131_S_AT 218283_AT 218386_X_AT 218482_AT 218846_AT 221763…
GO:MF	transcription coregulator activity	GO:0003712	false	0.00272178	2.56515	524	590	35	20212	1559078_AT 1559946_S_AT 200679_X_AT 200942_S_AT 201218_AT 202460_S_AT 202657_S_AT 202704_AT 203497_AT 205690_S_AT 206074_S_AT 208808_S_AT 209014_AT 209049_S_AT 211989_AT 212124_AT 212209_AT 214512_S_AT 215012_AT 217729_S_AT 218283_AT 218386_X_AT 218482_AT 218846_AT 221763_AT 222415_AT 222737_S_AT 223132_S_AT 224570_S_AT 227277_AT 229943_AT 1556058_S_AT 209334_S_AT 231934_AT 234393_AT
GO:MF	transcription coactivator activity	GO:0003713	false	0.00803079	2.09524	290	590	23	20212	200679_X_AT 201218_AT 202460_S_AT 202657_S_AT 203497_AT 205690_S_AT 206074_S_AT 208808_S_AT 209014_AT 211989_AT 212124_AT 214512_S_AT 218283_AT 218386_X_AT 218482_AT 218846_AT 222415_AT 222737_S_AT 223132_S_AT 227277_AT 229943_AT 209334_S_AT 231934_AT
GO:MF	oxidoreduction-driven active transmembrane transporter activity	GO:0015453	true	0.0103951	1.98317	66	590	10	20212	1553575_AT 201304_AT 201757_AT 202001_S_AT 202110_AT 202233_S_AT 202298_AT 203371_S_AT 218201_AT 223281_S_AT
GO:MF	enzyme binding	GO:0019899	false	0.0150929	1.82123	2103	590	93	20212	1552701_A_AT 1553678_A_AT 1554078_S_AT 1559078_AT 1559946_S_AT 200679_X_AT 201039_S_AT 201091_S_AT 201218_AT 201300_S_AT 201384_S_AT 201408_AT 201483_S_AT 201518_AT 201713_S_AT 201879_AT 201898_S_AT 202060_AT 202425_X_AT 202704_AT 202724_S_AT 202897_AT 202918_S_AT 203076_S_AT 203250_AT 203474_AT 203497_AT 204132_S_AT 204396_S_AT 204837_AT 205178_S_AT 205484_AT 206074_S_AT 206170_AT 206445_S_AT 20…
GO:MF	ubiquitin-like protein transferase activity	GO:0019787	true	0.0208859	1.68015	484	590	31	20212	201713_S_AT 201879_AT 201898_S_AT 203497_AT 205178_S_AT 208728_S_AT 208924_AT 210538_S_AT 212124_AT 212155_AT 215012_AT 217750_S_AT 223132_S_AT 224747_AT 225813_AT 226917_S_AT 229943_AT 234950_S_AT 235199_AT 235222_X_AT 1559214_AT 1570251_AT 210867_AT 211444_AT 231934_AT 232365_AT 232792_AT 236122_AT 241140_AT 241826_X_AT 241887_AT
GO:MF	aminoacyltransferase activity	GO:0016755	false	0.0396414	1.40185	501	590	31	20212	201713_S_AT 201879_AT 201898_S_AT 203497_AT 205178_S_AT 208728_S_AT 208924_AT 210538_S_AT 212124_AT 212155_AT 215012_AT 217750_S_AT 223132_S_AT 224747_AT 225813_AT 226917_S_AT 229943_AT 234950_S_AT 235199_AT 235222_X_AT 1559214_AT 1570251_AT 210867_AT 211444_AT 231934_AT 232365_AT 232792_AT 236122_AT 241140_AT 241826_X_AT 241887_AT
GO:MF	mitogen-activated protein kinase kinase kinase binding	GO:0031435	true	0.0496598	1.30399	17	590	5	20212	208728_S_AT 210776_X_AT 223132_S_AT 1556064_AT 228942_S_AT
GO:BP	cellular nitrogen compound biosynthetic process	GO:0044271	true	4.62768e-12	11.3346	4836	574	215	21031	1552701_A_AT 1553575_AT 1553979_AT 1554021_A_AT 1554078_S_AT 1554390_S_AT 1555756_A_AT 1559078_AT 1559946_S_AT 1569594_A_AT 200050_AT 200679_X_AT 200942_S_AT 200970_S_AT 201091_S_AT 201138_S_AT 201218_AT 201280_S_AT 201300_S_AT 201304_AT 201327_S_AT 201363_S_AT 201369_S_AT 201483_S_AT 201518_AT 201595_S_AT 201637_S_AT 201699_AT 201757_AT 201971_S_AT 202001_S_AT 202060_AT 202138_X_AT 202163_S_AT 2…
GO:BP	aromatic compound biosynthetic process	GO:0019438	false	1.61343e-08	7.79225	4116	574	180	21031	1552701_A_AT 1553575_AT 1553979_AT 1554021_A_AT 1554078_S_AT 1554390_S_AT 1555756_A_AT 1559078_AT 1559946_S_AT 200050_AT 200679_X_AT 200942_S_AT 201091_S_AT 201218_AT 201280_S_AT 201300_S_AT 201304_AT 201327_S_AT 201363_S_AT 201483_S_AT 201518_AT 201699_AT 201757_AT 201971_S_AT 202001_S_AT 202060_AT 202171_AT 202279_AT 202298_AT 202325_S_AT 202425_X_AT 202460_S_AT 202657_S_AT 202704_AT 202724_S_A…
GO:BP	heterocycle biosynthetic process	GO:0018130	false	2.46427e-08	7.60831	4105	574	179	21031	1552701_A_AT 1553575_AT 1553979_AT 1554021_A_AT 1554078_S_AT 1554390_S_AT 1555756_A_AT 1559078_AT 1559946_S_AT 200050_AT 200679_X_AT 200942_S_AT 201091_S_AT 201218_AT 201280_S_AT 201300_S_AT 201304_AT 201327_S_AT 201363_S_AT 201483_S_AT 201518_AT 201699_AT 201757_AT 201971_S_AT 202001_S_AT 202060_AT 202171_AT 202279_AT 202298_AT 202325_S_AT 202425_X_AT 202460_S_AT 202657_S_AT 202704_AT 202724_S_A…
GO:BP	regulation of primary metabolic process	GO:0080090	false	7.30047e-08	7.13665	5591	574	224	21031	1552701_A_AT 1553979_AT 1554021_A_AT 1554078_S_AT 1554390_S_AT 1555756_A_AT 1559078_AT 1559946_S_AT 1568763_S_AT 200050_AT 200679_X_AT 200942_S_AT 200970_S_AT 201039_S_AT 201091_S_AT 201138_S_AT 201218_AT 201223_S_AT 201280_S_AT 201300_S_AT 201327_S_AT 201363_S_AT 201369_S_AT 201376_S_AT 201483_S_AT 201518_AT 201626_AT 201637_S_AT 201678_S_AT 201699_AT 201713_S_AT 201879_AT 201930_AT 202060_AT 20…
GO:BP	nucleobase-containing compound biosynthetic process	GO:0034654	false	1.22127e-07	6.91319	4027	574	174	21031	1552701_A_AT 1553575_AT 1553979_AT 1554021_A_AT 1554078_S_AT 1554390_S_AT 1555756_A_AT 1559078_AT 1559946_S_AT 200050_AT 200679_X_AT 200942_S_AT 201091_S_AT 201218_AT 201280_S_AT 201300_S_AT 201304_AT 201327_S_AT 201363_S_AT 201483_S_AT 201518_AT 201699_AT 201757_AT 201971_S_AT 202001_S_AT 202060_AT 202171_AT 202279_AT 202298_AT 202325_S_AT 202425_X_AT 202460_S_AT 202657_S_AT 202704_AT 202724_S_A…
GO:BP	organonitrogen compound metabolic process	GO:1901564	false	1.31017e-07	6.88267	5986	574	235	21031	1552701_A_AT 1553575_AT 1554078_S_AT 1554868_S_AT 1555756_A_AT 1559078_AT 1559946_S_AT 1568763_S_AT 1569594_A_AT 200679_X_AT 200970_S_AT 201039_S_AT 201138_S_AT 201223_S_AT 201280_S_AT 201300_S_AT 201304_AT 201327_S_AT 201363_S_AT 201369_S_AT 201408_AT 201595_S_AT 201637_S_AT 201678_S_AT 201699_AT 201713_S_AT 201757_AT 201879_AT 201898_S_AT 201971_S_AT 202001_S_AT 202138_X_AT 202163_S_AT 202279_A…
GO:BP	regulation of nitrogen compound metabolic process	GO:0051171	false	1.6524e-07	6.78189	5440	574	218	21031	1552701_A_AT 1553979_AT 1554021_A_AT 1554078_S_AT 1554390_S_AT 1555756_A_AT 1559078_AT 1559946_S_AT 1568763_S_AT 200050_AT 200679_X_AT 200942_S_AT 200970_S_AT 201039_S_AT 201091_S_AT 201138_S_AT 201218_AT 201223_S_AT 201280_S_AT 201300_S_AT 201327_S_AT 201363_S_AT 201369_S_AT 201376_S_AT 201483_S_AT 201518_AT 201637_S_AT 201678_S_AT 201699_AT 201879_AT 201930_AT 202060_AT 202138_X_AT 202163_S_AT …
GO:BP	organic cyclic compound biosynthetic process	GO:1901362	false	1.82316e-07	6.73918	4264	574	181	21031	1552701_A_AT 1553575_AT 1553979_AT 1554021_A_AT 1554078_S_AT 1554390_S_AT 1555756_A_AT 1559078_AT 1559946_S_AT 200050_AT 200679_X_AT 200942_S_AT 201091_S_AT 201218_AT 201280_S_AT 201300_S_AT 201304_AT 201327_S_AT 201363_S_AT 201483_S_AT 201518_AT 201626_AT 201699_AT 201757_AT 201971_S_AT 202001_S_AT 202060_AT 202171_AT 202279_AT 202298_AT 202325_S_AT 202425_X_AT 202460_S_AT 202657_S_AT 202704_AT …
GO:BP	regulation of nucleobase-containing compound metabolic process	GO:0019219	false	2.94259e-06	5.53127	4063	574	170	21031	1552701_A_AT 1553979_AT 1554021_A_AT 1554078_S_AT 1554390_S_AT 1555756_A_AT 1559078_AT 1559946_S_AT 200050_AT 200679_X_AT 200942_S_AT 201091_S_AT 201218_AT 201280_S_AT 201300_S_AT 201327_S_AT 201369_S_AT 201376_S_AT 201483_S_AT 201518_AT 201637_S_AT 201678_S_AT 201699_AT 201930_AT 202060_AT 202163_S_AT 202171_AT 202425_X_AT 202460_S_AT 202657_S_AT 202704_AT 202724_S_AT 202824_S_AT 203076_S_AT 203…
GO:BP	positive regulation of biological process	GO:0048518	false	6.03415e-06	5.21938	6250	574	236	21031	1552426_A_AT 1552701_A_AT 1553678_A_AT 1554078_S_AT 1554390_S_AT 1555756_A_AT 1559078_AT 1559946_S_AT 1568763_S_AT 200679_X_AT 200970_S_AT 201039_S_AT 201138_S_AT 201218_AT 201280_S_AT 201300_S_AT 201327_S_AT 201369_S_AT 201483_S_AT 201637_S_AT 201678_S_AT 201699_AT 201879_AT 202060_AT 202138_X_AT 202163_S_AT 202171_AT 202425_X_AT 202428_X_AT 202460_S_AT 202574_S_AT 202657_S_AT 202704_AT 202724_S…
GO:BP	regulation of metabolic process	GO:0019222	false	8.46062e-06	5.0726	7158	574	262	21031	1552701_A_AT 1553678_A_AT 1553979_AT 1554021_A_AT 1554078_S_AT 1554390_S_AT 1555756_A_AT 1559078_AT 1559946_S_AT 1568763_S_AT 200050_AT 200679_X_AT 200942_S_AT 200970_S_AT 201039_S_AT 201091_S_AT 201138_S_AT 201218_AT 201223_S_AT 201280_S_AT 201300_S_AT 201327_S_AT 201363_S_AT 201369_S_AT 201376_S_AT 201408_AT 201483_S_AT 201518_AT 201626_AT 201637_S_AT 201678_S_AT 201699_AT 201713_S_AT 201879_AT…
GO:BP	regulation of RNA metabolic process	GO:0051252	false	1.18959e-05	4.9246	3763	574	158	21031	1552701_A_AT 1553979_AT 1554021_A_AT 1554078_S_AT 1554390_S_AT 1555756_A_AT 1559078_AT 1559946_S_AT 200050_AT 200679_X_AT 200942_S_AT 201091_S_AT 201218_AT 201280_S_AT 201300_S_AT 201369_S_AT 201376_S_AT 201483_S_AT 201518_AT 201637_S_AT 201699_AT 202060_AT 202163_S_AT 202171_AT 202425_X_AT 202460_S_AT 202657_S_AT 202704_AT 202724_S_AT 202824_S_AT 203076_S_AT 203250_AT 203497_AT 203534_AT 203693_…
GO:BP	intracellular transport	GO:0046907	true	1.48789e-05	4.82743	1371	574	75	21031	1554390_S_AT 1568763_S_AT 1569594_A_AT 200942_S_AT 201138_S_AT 201280_S_AT 201569_S_AT 201626_AT 201713_S_AT 202097_AT 202425_X_AT 202798_AT 203310_AT 203497_AT 203519_S_AT 203693_S_AT 206095_S_AT 206170_AT 208728_S_AT 208864_S_AT 208946_S_AT 209150_S_AT 210312_S_AT 213746_S_AT 213939_S_AT 215691_X_AT 215936_S_AT 217772_S_AT 217887_S_AT 218050_AT 218178_S_AT 218357_S_AT 218482_AT 219402_S_AT 2224…
GO:BP	positive regulation of nucleobase-containing compound metabolic process	GO:0045935	false	1.51481e-05	4.81964	2052	574	100	21031	1554390_S_AT 1559078_AT 1559946_S_AT 200679_X_AT 201218_AT 201280_S_AT 201327_S_AT 201369_S_AT 201483_S_AT 201637_S_AT 201678_S_AT 201699_AT 202060_AT 202163_S_AT 202171_AT 202425_X_AT 202460_S_AT 202657_S_AT 202704_AT 202724_S_AT 203076_S_AT 203250_AT 203497_AT 203534_AT 203693_S_AT 204132_S_AT 205690_S_AT 206074_S_AT 206170_AT 208003_S_AT 208442_S_AT 208691_AT 208728_S_AT 208808_S_AT 208863_S_A…
GO:BP	protein metabolic process	GO:0019538	false	3.91882e-05	4.40685	4912	574	192	21031	1552701_A_AT 1554078_S_AT 1554868_S_AT 1555756_A_AT 1559078_AT 1559946_S_AT 1568763_S_AT 1569594_A_AT 200679_X_AT 200970_S_AT 201039_S_AT 201138_S_AT 201223_S_AT 201280_S_AT 201300_S_AT 201327_S_AT 201363_S_AT 201369_S_AT 201408_AT 201595_S_AT 201637_S_AT 201678_S_AT 201699_AT 201713_S_AT 201879_AT 201898_S_AT 202138_X_AT 202163_S_AT 202292_X_AT 202425_X_AT 202428_X_AT 202574_S_AT 202673_AT 20270…
GO:BP	positive regulation of nitrogen compound metabolic process	GO:0051173	false	4.11951e-05	4.38515	3001	574	131	21031	1554078_S_AT 1554390_S_AT 1555756_A_AT 1559078_AT 1559946_S_AT 1568763_S_AT 200679_X_AT 200970_S_AT 201039_S_AT 201138_S_AT 201218_AT 201280_S_AT 201300_S_AT 201327_S_AT 201369_S_AT 201483_S_AT 201637_S_AT 201678_S_AT 201699_AT 201879_AT 202060_AT 202138_X_AT 202163_S_AT 202171_AT 202425_X_AT 202460_S_AT 202657_S_AT 202704_AT 202724_S_AT 203076_S_AT 203250_AT 203497_AT 203534_AT 203693_S_AT 20413…
GO:BP	biological regulation	GO:0065007	false	4.38965e-05	4.35757	12680	574	409	21031	1552426_A_AT 1552701_A_AT 1553678_A_AT 1553979_AT 1554021_A_AT 1554078_S_AT 1554390_S_AT 1555756_A_AT 1559078_AT 1559946_S_AT 1568763_S_AT 200050_AT 200679_X_AT 200942_S_AT 200970_S_AT 201039_S_AT 201091_S_AT 201138_S_AT 201218_AT 201223_S_AT 201266_AT 201280_S_AT 201300_S_AT 201327_S_AT 201363_S_AT 201369_S_AT 201376_S_AT 201384_S_AT 201408_AT 201483_S_AT 201518_AT 201595_S_AT 201626_AT 201637_S…
GO:BP	positive regulation of RNA metabolic process	GO:0051254	false	5.67328e-05	4.24617	1852	574	91	21031	1554390_S_AT 1559078_AT 1559946_S_AT 200679_X_AT 201218_AT 201280_S_AT 201369_S_AT 201483_S_AT 201637_S_AT 201699_AT 202060_AT 202163_S_AT 202171_AT 202425_X_AT 202460_S_AT 202657_S_AT 202704_AT 202724_S_AT 203076_S_AT 203250_AT 203497_AT 203534_AT 203693_S_AT 204132_S_AT 205690_S_AT 206074_S_AT 206170_AT 208003_S_AT 208442_S_AT 208808_S_AT 208863_S_AT 209014_AT 209049_S_AT 209330_S_AT 209348_S_A…
GO:BP	aerobic electron transport chain	GO:0019646	true	6.50911e-05	4.18648	92	574	15	21031	1553575_AT 201304_AT 201568_AT 201754_AT 201757_AT 202001_S_AT 202110_AT 202233_S_AT 202298_AT 203371_S_AT 205849_S_AT 209095_AT 213846_AT 218201_AT 223281_S_AT
GO:BP	regulation of biological process	GO:0050789	false	6.94589e-05	4.15827	12287	574	398	21031	1552426_A_AT 1552701_A_AT 1553678_A_AT 1553979_AT 1554021_A_AT 1554078_S_AT 1554390_S_AT 1555756_A_AT 1559078_AT 1559946_S_AT 1568763_S_AT 200050_AT 200679_X_AT 200942_S_AT 200970_S_AT 201039_S_AT 201091_S_AT 201138_S_AT 201218_AT 201223_S_AT 201266_AT 201280_S_AT 201300_S_AT 201327_S_AT 201363_S_AT 201369_S_AT 201376_S_AT 201384_S_AT 201408_AT 201483_S_AT 201518_AT 201595_S_AT 201626_AT 201637_S…
GO:BP	protein transport	GO:0015031	false	7.31453e-05	4.13581	1424	574	75	21031	1568763_S_AT 200970_S_AT 201280_S_AT 201569_S_AT 201626_AT 201713_S_AT 202097_AT 202425_X_AT 202724_S_AT 202798_AT 203076_S_AT 203310_AT 203497_AT 203693_S_AT 208691_AT 208728_S_AT 208864_S_AT 208946_S_AT 210312_S_AT 213746_S_AT 213939_S_AT 214433_S_AT 214709_S_AT 215691_X_AT 215936_S_AT 217772_S_AT 217887_S_AT 218050_AT 218178_S_AT 218357_S_AT 218482_AT 219402_S_AT 222436_S_AT 222708_S_AT 222826…
GO:BP	regulation of cellular process	GO:0050794	false	9.94268e-05	4.0025	11738	574	383	21031	1552426_A_AT 1552701_A_AT 1553678_A_AT 1553979_AT 1554021_A_AT 1554078_S_AT 1554390_S_AT 1555756_A_AT 1559078_AT 1559946_S_AT 1568763_S_AT 200050_AT 200679_X_AT 200942_S_AT 200970_S_AT 201039_S_AT 201091_S_AT 201138_S_AT 201218_AT 201266_AT 201280_S_AT 201300_S_AT 201327_S_AT 201363_S_AT 201369_S_AT 201376_S_AT 201384_S_AT 201408_AT 201483_S_AT 201518_AT 201595_S_AT 201626_AT 201637_S_AT 201678_S…
GO:BP	nitrogen compound transport	GO:0071705	false	0.000122616	3.91145	1911	574	92	21031	1553678_A_AT 1568763_S_AT 200970_S_AT 201138_S_AT 201280_S_AT 201569_S_AT 201626_AT 201713_S_AT 201917_S_AT 202097_AT 202425_X_AT 202724_S_AT 202798_AT 203076_S_AT 203310_AT 203497_AT 203519_S_AT 203693_S_AT 208691_AT 208728_S_AT 208863_S_AT 208864_S_AT 208946_S_AT 209301_AT 210312_S_AT 213746_S_AT 213939_S_AT 214433_S_AT 214709_S_AT 215691_X_AT 215936_S_AT 217772_S_AT 217887_S_AT 218050_AT 21817…
GO:BP	positive regulation of metabolic process	GO:0009893	false	0.000139733	3.8547	3711	574	152	21031	1554078_S_AT 1554390_S_AT 1555756_A_AT 1559078_AT 1559946_S_AT 1568763_S_AT 200679_X_AT 200970_S_AT 201039_S_AT 201138_S_AT 201218_AT 201280_S_AT 201300_S_AT 201327_S_AT 201369_S_AT 201483_S_AT 201637_S_AT 201678_S_AT 201699_AT 201879_AT 202060_AT 202138_X_AT 202163_S_AT 202171_AT 202425_X_AT 202460_S_AT 202657_S_AT 202704_AT 202724_S_AT 203076_S_AT 203250_AT 203497_AT 203534_AT 203693_S_AT 20413…
GO:BP	DNA-templated transcription	GO:0006351	false	0.000179298	3.74642	3569	574	147	21031	1552701_A_AT 1553979_AT 1554021_A_AT 1554078_S_AT 1554390_S_AT 1555756_A_AT 1559078_AT 1559946_S_AT 200050_AT 200679_X_AT 200942_S_AT 201091_S_AT 201218_AT 201280_S_AT 201300_S_AT 201363_S_AT 201483_S_AT 201518_AT 201699_AT 202060_AT 202171_AT 202425_X_AT 202460_S_AT 202657_S_AT 202704_AT 202724_S_AT 202824_S_AT 203076_S_AT 203250_AT 203497_AT 203693_S_AT 204132_S_AT 205594_AT 205690_S_AT 206074_…
GO:BP	RNA biosynthetic process	GO:0032774	false	0.000181953	3.74004	3601	574	148	21031	1552701_A_AT 1553979_AT 1554021_A_AT 1554078_S_AT 1554390_S_AT 1555756_A_AT 1559078_AT 1559946_S_AT 200050_AT 200679_X_AT 200942_S_AT 201091_S_AT 201218_AT 201280_S_AT 201300_S_AT 201363_S_AT 201483_S_AT 201518_AT 201699_AT 202060_AT 202171_AT 202425_X_AT 202460_S_AT 202657_S_AT 202704_AT 202724_S_AT 202824_S_AT 203076_S_AT 203250_AT 203497_AT 203693_S_AT 204132_S_AT 205594_AT 205690_S_AT 206074_…
GO:BP	positive regulation of macromolecule metabolic process	GO:0010604	false	0.000200679	3.6975	3420	574	142	21031	1554078_S_AT 1554390_S_AT 1555756_A_AT 1559078_AT 1559946_S_AT 1568763_S_AT 200679_X_AT 200970_S_AT 201039_S_AT 201138_S_AT 201218_AT 201280_S_AT 201300_S_AT 201327_S_AT 201369_S_AT 201483_S_AT 201637_S_AT 201678_S_AT 201699_AT 201879_AT 202060_AT 202138_X_AT 202163_S_AT 202171_AT 202425_X_AT 202460_S_AT 202657_S_AT 202704_AT 202724_S_AT 203076_S_AT 203250_AT 203497_AT 203534_AT 203693_S_AT 20413…
GO:BP	ATP synthesis coupled electron transport	GO:0042773	false	0.000205885	3.68638	100	574	15	21031	1553575_AT 201304_AT 201568_AT 201754_AT 201757_AT 202001_S_AT 202110_AT 202233_S_AT 202298_AT 203371_S_AT 205849_S_AT 209095_AT 213846_AT 218201_AT 223281_S_AT
GO:BP	mitochondrial ATP synthesis coupled electron transport	GO:0042775	false	0.000205885	3.68638	100	574	15	21031	1553575_AT 201304_AT 201568_AT 201754_AT 201757_AT 202001_S_AT 202110_AT 202233_S_AT 202298_AT 203371_S_AT 205849_S_AT 209095_AT 213846_AT 218201_AT 223281_S_AT
GO:BP	oxidative phosphorylation	GO:0006119	false	0.000216351	3.66484	145	574	18	21031	1553575_AT 201304_AT 201568_AT 201754_AT 201757_AT 202001_S_AT 202110_AT 202233_S_AT 202298_AT 202325_S_AT 203371_S_AT 205849_S_AT 207335_X_AT 209095_AT 213846_AT 218201_AT 223281_S_AT 204348_S_AT
GO:BP	positive regulation of cellular process	GO:0048522	false	0.000220145	3.65729	5717	574	213	21031	1552426_A_AT 1552701_A_AT 1553678_A_AT 1554078_S_AT 1554390_S_AT 1555756_A_AT 1559078_AT 1559946_S_AT 1568763_S_AT 200679_X_AT 200970_S_AT 201039_S_AT 201138_S_AT 201218_AT 201280_S_AT 201300_S_AT 201327_S_AT 201369_S_AT 201483_S_AT 201637_S_AT 201678_S_AT 201699_AT 202060_AT 202163_S_AT 202171_AT 202425_X_AT 202460_S_AT 202574_S_AT 202657_S_AT 202704_AT 202724_S_AT 202897_AT 203076_S_AT 203250_A…
GO:BP	cellular localization	GO:0051641	false	0.000258434	3.58765	3621	574	148	21031	1553678_A_AT 1554078_S_AT 1554390_S_AT 1559946_S_AT 1568763_S_AT 1569594_A_AT 200942_S_AT 200970_S_AT 201138_S_AT 201218_AT 201280_S_AT 201300_S_AT 201327_S_AT 201569_S_AT 201626_AT 201637_S_AT 201713_S_AT 201971_S_AT 202097_AT 202425_X_AT 202724_S_AT 202798_AT 203076_S_AT 203310_AT 203497_AT 203519_S_AT 203693_S_AT 204838_S_AT 206095_S_AT 206170_AT 207812_S_AT 208442_S_AT 208691_AT 208728_S_AT 2…
GO:BP	chromosome organization	GO:0051276	true	0.000313409	3.50389	635	574	42	21031	1559946_S_AT 200679_X_AT 201327_S_AT 201930_AT 203087_S_AT 204838_S_AT 206074_S_AT 208066_S_AT 208442_S_AT 208808_S_AT 208946_S_AT 209150_S_AT 209285_S_AT 209330_S_AT 211989_AT 212132_AT 212264_S_AT 212918_AT 213251_AT 213746_S_AT 214512_S_AT 216199_S_AT 218178_S_AT 221771_S_AT 222436_S_AT 222479_S_AT 222737_S_AT 225107_AT 226843_S_AT 226917_S_AT 231848_X_AT 1557502_AT 1559006_AT 228323_AT 228559…
GO:BP	establishment of localization in cell	GO:0051649	false	0.000516168	3.28721	1972	574	92	21031	1553678_A_AT 1554390_S_AT 1568763_S_AT 1569594_A_AT 200942_S_AT 201138_S_AT 201218_AT 201280_S_AT 201569_S_AT 201626_AT 201713_S_AT 201971_S_AT 202097_AT 202425_X_AT 202798_AT 203310_AT 203497_AT 203519_S_AT 203693_S_AT 206095_S_AT 206170_AT 208442_S_AT 208728_S_AT 208864_S_AT 208946_S_AT 209150_S_AT 210312_S_AT 211734_S_AT 213746_S_AT 213939_S_AT 215691_X_AT 215936_S_AT 217772_S_AT 217887_S_AT 2…
GO:BP	positive regulation of catabolic process	GO:0009896	false	0.0005485	3.26082	533	574	37	21031	200679_X_AT 201039_S_AT 201280_S_AT 201369_S_AT 201637_S_AT 201699_AT 201879_AT 202163_S_AT 202704_AT 202724_S_AT 203534_AT 204132_S_AT 206170_AT 208442_S_AT 208946_S_AT 209217_S_AT 209330_S_AT 214273_X_AT 223132_S_AT 224652_AT 225123_AT 225813_AT 226843_S_AT 227277_AT 227366_AT 229943_AT 234950_S_AT 1555330_AT 1556064_AT 1559214_AT 1570251_AT 207851_S_AT 210739_X_AT 210867_AT 211444_AT 228942_S_…
GO:BP	regulation of macromolecule metabolic process	GO:0060255	false	0.000562156	3.25014	6631	574	238	21031	1552701_A_AT 1553979_AT 1554021_A_AT 1554078_S_AT 1554390_S_AT 1555756_A_AT 1559078_AT 1559946_S_AT 1568763_S_AT 200050_AT 200679_X_AT 200942_S_AT 200970_S_AT 201039_S_AT 201091_S_AT 201138_S_AT 201218_AT 201223_S_AT 201280_S_AT 201300_S_AT 201327_S_AT 201363_S_AT 201369_S_AT 201376_S_AT 201408_AT 201483_S_AT 201518_AT 201637_S_AT 201678_S_AT 201699_AT 201879_AT 201930_AT 202060_AT 202138_X_AT 20…
GO:BP	macromolecule modification	GO:0043412	false	0.000572745	3.24204	3262	574	135	21031	1554078_S_AT 1554868_S_AT 1559078_AT 1568763_S_AT 200970_S_AT 201138_S_AT 201280_S_AT 201300_S_AT 201363_S_AT 201408_AT 201637_S_AT 201713_S_AT 201879_AT 201898_S_AT 202138_X_AT 202292_X_AT 202425_X_AT 202428_X_AT 202574_S_AT 202673_AT 202724_S_AT 202824_S_AT 202897_AT 203316_S_AT 203497_AT 204396_S_AT 205178_S_AT 205644_S_AT 206170_AT 206445_S_AT 206875_S_AT 208066_S_AT 208442_S_AT 208691_AT 208…
GO:BP	establishment of protein localization	GO:0045184	false	0.000637794	3.19532	1924	574	90	21031	1559946_S_AT 1568763_S_AT 200970_S_AT 201280_S_AT 201300_S_AT 201327_S_AT 201569_S_AT 201626_AT 201713_S_AT 202097_AT 202425_X_AT 202724_S_AT 202798_AT 203076_S_AT 203310_AT 203497_AT 203693_S_AT 207812_S_AT 208691_AT 208728_S_AT 208864_S_AT 208946_S_AT 210312_S_AT 213746_S_AT 213939_S_AT 214433_S_AT 214709_S_AT 215691_X_AT 215936_S_AT 217772_S_AT 217887_S_AT 218050_AT 218057_X_AT 218178_S_AT 218…
GO:BP	ribonucleotide biosynthetic process	GO:0009260	false	0.000978279	3.00954	231	574	22	21031	1553575_AT 201304_AT 201757_AT 201971_S_AT 202001_S_AT 202279_AT 202298_AT 202325_S_AT 203302_AT 203371_S_AT 203741_S_AT 204639_AT 207335_X_AT 208972_S_AT 209095_AT 218201_AT 221751_AT 222448_S_AT 239798_AT 1556064_AT 204348_S_AT 238856_S_AT
GO:BP	aerobic respiration	GO:0009060	false	0.00109521	2.9605	196	574	20	21031	1553575_AT 201304_AT 201568_AT 201754_AT 201757_AT 202001_S_AT 202110_AT 202233_S_AT 202298_AT 202325_S_AT 203371_S_AT 205849_S_AT 207335_X_AT 209095_AT 213846_AT 218201_AT 223281_S_AT 225892_AT 204348_S_AT 238856_S_AT
GO:BP	modification-dependent macromolecule catabolic process	GO:0043632	true	0.00119298	2.92337	620	574	40	21031	1554868_S_AT 1569594_A_AT 201039_S_AT 201223_S_AT 201280_S_AT 201699_AT 201879_AT 201898_S_AT 202824_S_AT 205178_S_AT 208924_AT 209150_S_AT 212155_AT 217750_S_AT 218178_S_AT 219402_S_AT 222436_S_AT 225422_AT 225813_AT 226843_S_AT 226917_S_AT 229467_AT 229943_AT 234950_S_AT 235199_AT 45828_AT 1555330_AT 1559214_AT 1570251_AT 209334_S_AT 210867_AT 211444_AT 215384_S_AT 215402_AT 231269_AT 232365_AT…
GO:BP	regulation of RNA biosynthetic process	GO:2001141	false	0.00127302	2.89516	3464	574	140	21031	1552701_A_AT 1553979_AT 1554021_A_AT 1554078_S_AT 1554390_S_AT 1555756_A_AT 1559078_AT 1559946_S_AT 200050_AT 200679_X_AT 200942_S_AT 201091_S_AT 201218_AT 201280_S_AT 201300_S_AT 201483_S_AT 201518_AT 201699_AT 202060_AT 202171_AT 202425_X_AT 202460_S_AT 202657_S_AT 202704_AT 202724_S_AT 202824_S_AT 203076_S_AT 203250_AT 203497_AT 203693_S_AT 204132_S_AT 205594_AT 205690_S_AT 206074_S_AT 206095_…
GO:BP	ubiquitin-dependent protein catabolic process	GO:0006511	false	0.00132284	2.87849	599	574	39	21031	1554868_S_AT 1569594_A_AT 201039_S_AT 201223_S_AT 201280_S_AT 201699_AT 201879_AT 201898_S_AT 202824_S_AT 205178_S_AT 208924_AT 209150_S_AT 212155_AT 217750_S_AT 218178_S_AT 219402_S_AT 222436_S_AT 225422_AT 225813_AT 226917_S_AT 229467_AT 229943_AT 234950_S_AT 235199_AT 45828_AT 1555330_AT 1559214_AT 1570251_AT 209334_S_AT 210867_AT 211444_AT 215384_S_AT 215402_AT 231269_AT 232365_AT 236122_AT 2…
GO:BP	organonitrogen compound biosynthetic process	GO:1901566	false	0.00147911	2.83	1761	574	83	21031	1553575_AT 1569594_A_AT 200970_S_AT 201138_S_AT 201304_AT 201369_S_AT 201595_S_AT 201637_S_AT 201757_AT 201971_S_AT 202001_S_AT 202138_X_AT 202163_S_AT 202279_AT 202298_AT 202325_S_AT 202428_X_AT 202574_S_AT 202673_AT 202704_AT 203302_AT 203371_S_AT 203741_S_AT 203781_AT 204132_S_AT 204639_AT 206445_S_AT 207335_X_AT 208972_S_AT 209095_AT 209330_S_AT 210243_S_AT 212132_AT 212442_S_AT 212603_AT 217…
GO:BP	localization	GO:0051179	false	0.0015245	2.81687	5520	574	203	21031	1553678_A_AT 1554078_S_AT 1554390_S_AT 1555756_A_AT 1559946_S_AT 1568763_S_AT 1569594_A_AT 200679_X_AT 200942_S_AT 200970_S_AT 201138_S_AT 201218_AT 201280_S_AT 201300_S_AT 201327_S_AT 201569_S_AT 201626_AT 201637_S_AT 201687_S_AT 201713_S_AT 201917_S_AT 201971_S_AT 202097_AT 202110_AT 202233_S_AT 202325_S_AT 202425_X_AT 202428_X_AT 202574_S_AT 202724_S_AT 202798_AT 202897_AT 203076_S_AT 203310_A…
GO:BP	response to stress	GO:0006950	true	0.00154834	2.81013	3855	574	152	21031	1552701_A_AT 1553678_A_AT 1554078_S_AT 1554390_S_AT 1555756_A_AT 1559946_S_AT 1568763_S_AT 200679_X_AT 200942_S_AT 200970_S_AT 201039_S_AT 201091_S_AT 201223_S_AT 201266_AT 201300_S_AT 201369_S_AT 201384_S_AT 201518_AT 201626_AT 201637_S_AT 201678_S_AT 201898_S_AT 201930_AT 202001_S_AT 202041_S_AT 202171_AT 202425_X_AT 202724_S_AT 202897_AT 203310_AT 203497_AT 203741_S_AT 204132_S_AT 204484_AT 20…
GO:BP	regulation of DNA-templated transcription	GO:0006355	false	0.00159011	2.79857	3446	574	139	21031	1552701_A_AT 1553979_AT 1554021_A_AT 1554078_S_AT 1554390_S_AT 1555756_A_AT 1559078_AT 1559946_S_AT 200050_AT 200679_X_AT 200942_S_AT 201091_S_AT 201218_AT 201280_S_AT 201300_S_AT 201483_S_AT 201518_AT 201699_AT 202060_AT 202171_AT 202425_X_AT 202460_S_AT 202657_S_AT 202704_AT 202724_S_AT 202824_S_AT 203076_S_AT 203250_AT 203497_AT 203693_S_AT 204132_S_AT 205594_AT 205690_S_AT 206074_S_AT 206095_…
GO:BP	ribose phosphate biosynthetic process	GO:0046390	false	0.00163008	2.78779	238	574	22	21031	1553575_AT 201304_AT 201757_AT 201971_S_AT 202001_S_AT 202279_AT 202298_AT 202325_S_AT 203302_AT 203371_S_AT 203741_S_AT 204639_AT 207335_X_AT 208972_S_AT 209095_AT 218201_AT 221751_AT 222448_S_AT 239798_AT 1556064_AT 204348_S_AT 238856_S_AT
GO:BP	organelle organization	GO:0006996	false	0.00186434	2.72948	3613	574	144	21031	1553575_AT 1553678_A_AT 1554078_S_AT 1554390_S_AT 1559946_S_AT 1568763_S_AT 1569594_A_AT 200679_X_AT 201304_AT 201327_S_AT 201569_S_AT 201626_AT 201637_S_AT 201757_AT 201917_S_AT 201930_AT 201971_S_AT 202001_S_AT 202097_AT 202209_AT 202298_AT 202798_AT 203087_S_AT 203371_S_AT 203474_AT 204484_AT 204838_S_AT 205681_AT 206074_S_AT 206170_AT 206875_S_AT 207812_S_AT 208066_S_AT 208442_S_AT 208691_AT …
GO:BP	transport	GO:0006810	false	0.0018996	2.72134	4350	574	167	21031	1553678_A_AT 1554390_S_AT 1555756_A_AT 1568763_S_AT 1569594_A_AT 200679_X_AT 200942_S_AT 200970_S_AT 201138_S_AT 201218_AT 201280_S_AT 201300_S_AT 201569_S_AT 201626_AT 201713_S_AT 201917_S_AT 201971_S_AT 202097_AT 202110_AT 202233_S_AT 202325_S_AT 202425_X_AT 202428_X_AT 202574_S_AT 202724_S_AT 202798_AT 202897_AT 203076_S_AT 203310_AT 203497_AT 203519_S_AT 203693_S_AT 204639_AT 204837_AT 205668…
GO:BP	modification-dependent protein catabolic process	GO:0019941	false	0.00199757	2.6995	609	574	39	21031	1554868_S_AT 1569594_A_AT 201039_S_AT 201223_S_AT 201280_S_AT 201699_AT 201879_AT 201898_S_AT 202824_S_AT 205178_S_AT 208924_AT 209150_S_AT 212155_AT 217750_S_AT 218178_S_AT 219402_S_AT 222436_S_AT 225422_AT 225813_AT 226917_S_AT 229467_AT 229943_AT 234950_S_AT 235199_AT 45828_AT 1555330_AT 1559214_AT 1570251_AT 209334_S_AT 210867_AT 211444_AT 215384_S_AT 215402_AT 231269_AT 232365_AT 236122_AT 2…
GO:BP	organic substance transport	GO:0071702	false	0.00202013	2.69462	2358	574	103	21031	1553678_A_AT 1568763_S_AT 200970_S_AT 201138_S_AT 201280_S_AT 201569_S_AT 201626_AT 201713_S_AT 201917_S_AT 202097_AT 202425_X_AT 202428_X_AT 202724_S_AT 202798_AT 203076_S_AT 203310_AT 203497_AT 203519_S_AT 203693_S_AT 208691_AT 208728_S_AT 208863_S_AT 208864_S_AT 208946_S_AT 209301_AT 210312_S_AT 213746_S_AT 213939_S_AT 214433_S_AT 214709_S_AT 215691_X_AT 215936_S_AT 217772_S_AT 217887_S_AT 218…
GO:BP	nuclear export	GO:0051168	false	0.00218673	2.6602	169	574	18	21031	1569594_A_AT 201138_S_AT 201713_S_AT 202097_AT 203519_S_AT 208864_S_AT 215936_S_AT 218482_AT 224068_X_AT 225107_AT 227728_AT 52169_AT 1555068_AT 1559006_AT 1562110_AT 206921_AT 236505_AT 244030_AT
GO:BP	protein modification process	GO:0036211	false	0.00224979	2.64786	3031	574	125	21031	1554078_S_AT 1554868_S_AT 1559078_AT 1568763_S_AT 200970_S_AT 201280_S_AT 201300_S_AT 201363_S_AT 201408_AT 201637_S_AT 201713_S_AT 201879_AT 201898_S_AT 202138_X_AT 202292_X_AT 202425_X_AT 202428_X_AT 202574_S_AT 202673_AT 202724_S_AT 202824_S_AT 202897_AT 203497_AT 204396_S_AT 205178_S_AT 206170_AT 206445_S_AT 206875_S_AT 208066_S_AT 208442_S_AT 208691_AT 208857_S_AT 208864_S_AT 208924_AT 20899…
GO:BP	protein modification by small protein conjugation	GO:0032446	false	0.00229613	2.639	858	574	49	21031	1554078_S_AT 1554868_S_AT 1559078_AT 1568763_S_AT 201363_S_AT 201713_S_AT 201879_AT 201898_S_AT 202138_X_AT 202824_S_AT 203497_AT 205178_S_AT 208924_AT 210538_S_AT 212124_AT 212155_AT 215012_AT 217750_S_AT 218050_AT 219242_AT 219402_S_AT 223132_S_AT 224747_AT 224793_S_AT 225422_AT 225813_AT 226119_AT 226845_S_AT 226917_S_AT 229943_AT 234950_S_AT 235199_AT 235222_X_AT 1555068_AT 1555330_AT 1556318…
GO:BP	proton motive force-driven ATP synthesis	GO:0015986	false	0.00264813	2.57706	77	574	12	21031	1553575_AT 201304_AT 201757_AT 201971_S_AT 202001_S_AT 202279_AT 202298_AT 202325_S_AT 203371_S_AT 207335_X_AT 208972_S_AT 218201_AT
GO:BP	positive regulation of DNA-templated transcription	GO:0045893	false	0.00277109	2.55735	1703	574	80	21031	1554390_S_AT 1559078_AT 1559946_S_AT 200679_X_AT 201218_AT 201280_S_AT 201483_S_AT 201699_AT 202060_AT 202171_AT 202425_X_AT 202460_S_AT 202657_S_AT 202724_S_AT 203076_S_AT 203250_AT 203497_AT 203693_S_AT 204132_S_AT 205690_S_AT 206074_S_AT 206170_AT 208003_S_AT 208442_S_AT 208808_S_AT 209014_AT 209049_S_AT 209330_S_AT 209348_S_AT 210776_X_AT 211989_AT 212124_AT 212155_AT 212382_AT 212591_AT 2132…
GO:BP	respiratory electron transport chain	GO:0022904	false	0.00288183	2.54033	122	574	15	21031	1553575_AT 201304_AT 201568_AT 201754_AT 201757_AT 202001_S_AT 202110_AT 202233_S_AT 202298_AT 203371_S_AT 205849_S_AT 209095_AT 213846_AT 218201_AT 223281_S_AT
GO:BP	positive regulation of RNA biosynthetic process	GO:1902680	false	0.00296782	2.52756	1706	574	80	21031	1554390_S_AT 1559078_AT 1559946_S_AT 200679_X_AT 201218_AT 201280_S_AT 201483_S_AT 201699_AT 202060_AT 202171_AT 202425_X_AT 202460_S_AT 202657_S_AT 202724_S_AT 203076_S_AT 203250_AT 203497_AT 203693_S_AT 204132_S_AT 205690_S_AT 206074_S_AT 206170_AT 208003_S_AT 208442_S_AT 208808_S_AT 209014_AT 209049_S_AT 209330_S_AT 209348_S_AT 210776_X_AT 211989_AT 212124_AT 212155_AT 212382_AT 212591_AT 2132…
GO:BP	cellular macromolecule localization	GO:0070727	false	0.0030791	2.51158	2742	574	115	21031	1553678_A_AT 1554078_S_AT 1559946_S_AT 1568763_S_AT 200970_S_AT 201138_S_AT 201280_S_AT 201300_S_AT 201327_S_AT 201569_S_AT 201626_AT 201713_S_AT 202097_AT 202425_X_AT 202724_S_AT 202798_AT 203076_S_AT 203310_AT 203497_AT 203693_S_AT 204838_S_AT 207812_S_AT 208442_S_AT 208691_AT 208728_S_AT 208864_S_AT 208946_S_AT 209014_AT 209049_S_AT 209217_S_AT 209285_S_AT 210312_S_AT 212264_S_AT 213396_S_AT 2…
GO:BP	protein modification by small protein conjugation or removal	GO:0070647	false	0.00310376	2.50811	970	574	53	21031	1554078_S_AT 1554868_S_AT 1559078_AT 1568763_S_AT 201363_S_AT 201713_S_AT 201879_AT 201898_S_AT 202138_X_AT 202824_S_AT 203497_AT 205178_S_AT 208924_AT 210538_S_AT 212124_AT 212155_AT 215012_AT 217750_S_AT 218050_AT 218386_X_AT 219242_AT 219402_S_AT 223132_S_AT 224747_AT 224793_S_AT 225422_AT 225813_AT 225925_S_AT 226119_AT 226505_X_AT 226845_S_AT 226917_S_AT 229943_AT 234950_S_AT 235199_AT 23522…
GO:BP	regulation of chromosome organization	GO:0033044	false	0.00326153	2.48658	248	574	22	21031	1559946_S_AT 201327_S_AT 208442_S_AT 208946_S_AT 209285_S_AT 209330_S_AT 211989_AT 212264_S_AT 213251_AT 214512_S_AT 216199_S_AT 221771_S_AT 222479_S_AT 222737_S_AT 225107_AT 226843_S_AT 226917_S_AT 231848_X_AT 228323_AT 234459_AT 235572_AT 236442_AT
GO:BP	macromolecule localization	GO:0033036	false	0.00337951	2.47115	3210	574	130	21031	1553678_A_AT 1554078_S_AT 1559946_S_AT 1568763_S_AT 200970_S_AT 201138_S_AT 201280_S_AT 201300_S_AT 201327_S_AT 201569_S_AT 201626_AT 201713_S_AT 202097_AT 202425_X_AT 202428_X_AT 202724_S_AT 202798_AT 203076_S_AT 203310_AT 203497_AT 203519_S_AT 203693_S_AT 204838_S_AT 207812_S_AT 208442_S_AT 208691_AT 208728_S_AT 208863_S_AT 208864_S_AT 208946_S_AT 209014_AT 209049_S_AT 209217_S_AT 209285_S_AT 2…
GO:BP	establishment of localization	GO:0051234	false	0.00340929	2.46734	4881	574	182	21031	1553678_A_AT 1554390_S_AT 1555756_A_AT 1559946_S_AT 1568763_S_AT 1569594_A_AT 200679_X_AT 200942_S_AT 200970_S_AT 201138_S_AT 201218_AT 201280_S_AT 201300_S_AT 201327_S_AT 201569_S_AT 201626_AT 201713_S_AT 201917_S_AT 201971_S_AT 202097_AT 202110_AT 202233_S_AT 202325_S_AT 202425_X_AT 202428_X_AT 202574_S_AT 202724_S_AT 202798_AT 202897_AT 203076_S_AT 203310_AT 203497_AT 203519_S_AT 203693_S_AT 2…
GO:BP	positive regulation of macromolecule biosynthetic process	GO:0010557	false	0.00389982	2.40896	2603	574	110	21031	1554390_S_AT 1555756_A_AT 1559078_AT 1559946_S_AT 200679_X_AT 200970_S_AT 201138_S_AT 201218_AT 201280_S_AT 201327_S_AT 201483_S_AT 201637_S_AT 201678_S_AT 201699_AT 202060_AT 202171_AT 202425_X_AT 202460_S_AT 202657_S_AT 202704_AT 202724_S_AT 203076_S_AT 203250_AT 203497_AT 203693_S_AT 204132_S_AT 205690_S_AT 206074_S_AT 206170_AT 206445_S_AT 207655_S_AT 208003_S_AT 208442_S_AT 208691_AT 208808_…
GO:BP	positive regulation of cellular catabolic process	GO:0031331	false	0.00394699	2.40373	332	574	26	21031	200679_X_AT 201369_S_AT 201637_S_AT 202163_S_AT 202704_AT 202724_S_AT 203534_AT 204132_S_AT 206170_AT 208442_S_AT 208946_S_AT 209217_S_AT 209330_S_AT 214273_X_AT 223132_S_AT 224652_AT 225123_AT 225813_AT 226843_S_AT 227277_AT 229943_AT 1556064_AT 207851_S_AT 210739_X_AT 210867_AT 234757_AT
GO:BP	positive regulation of cellular metabolic process	GO:0031325	false	0.00404061	2.39355	3346	574	134	21031	1554390_S_AT 1555756_A_AT 1559078_AT 1559946_S_AT 200679_X_AT 200970_S_AT 201138_S_AT 201218_AT 201280_S_AT 201300_S_AT 201327_S_AT 201369_S_AT 201483_S_AT 201637_S_AT 201678_S_AT 201699_AT 202060_AT 202163_S_AT 202171_AT 202425_X_AT 202460_S_AT 202657_S_AT 202704_AT 202724_S_AT 203076_S_AT 203250_AT 203497_AT 203534_AT 203693_S_AT 204132_S_AT 204837_AT 205690_S_AT 206074_S_AT 206170_AT 206445_S_…
GO:BP	protein localization	GO:0008104	false	0.00436464	2.36005	2731	574	114	21031	1553678_A_AT 1554078_S_AT 1559946_S_AT 1568763_S_AT 200970_S_AT 201138_S_AT 201280_S_AT 201300_S_AT 201327_S_AT 201569_S_AT 201626_AT 201713_S_AT 202097_AT 202425_X_AT 202724_S_AT 202798_AT 203076_S_AT 203310_AT 203497_AT 203693_S_AT 204838_S_AT 207812_S_AT 208691_AT 208728_S_AT 208864_S_AT 208946_S_AT 209014_AT 209049_S_AT 209217_S_AT 209285_S_AT 210312_S_AT 212264_S_AT 213396_S_AT 213475_S_AT 2…
GO:BP	purine ribonucleotide biosynthetic process	GO:0009152	false	0.00507427	2.29463	216	574	20	21031	1553575_AT 201304_AT 201757_AT 201971_S_AT 202001_S_AT 202279_AT 202298_AT 202325_S_AT 203371_S_AT 203741_S_AT 204639_AT 207335_X_AT 208972_S_AT 209095_AT 218201_AT 221751_AT 239798_AT 1556064_AT 204348_S_AT 238856_S_AT
GO:BP	regulation of cellular metabolic process	GO:0031323	false	0.00552116	2.25797	6673	574	234	21031	1552701_A_AT 1553979_AT 1554021_A_AT 1554078_S_AT 1554390_S_AT 1555756_A_AT 1559078_AT 1559946_S_AT 200050_AT 200679_X_AT 200942_S_AT 200970_S_AT 201091_S_AT 201138_S_AT 201218_AT 201280_S_AT 201300_S_AT 201327_S_AT 201369_S_AT 201376_S_AT 201408_AT 201483_S_AT 201518_AT 201626_AT 201637_S_AT 201678_S_AT 201699_AT 201930_AT 201971_S_AT 202060_AT 202163_S_AT 202171_AT 202425_X_AT 202428_X_AT 20246…
GO:BP	intracellular protein transport	GO:0006886	false	0.00600332	2.22161	686	574	41	21031	1568763_S_AT 201569_S_AT 201626_AT 201713_S_AT 202097_AT 202425_X_AT 202798_AT 203310_AT 203497_AT 203693_S_AT 208728_S_AT 208864_S_AT 208946_S_AT 213746_S_AT 213939_S_AT 217772_S_AT 218050_AT 218357_S_AT 219402_S_AT 222708_S_AT 224068_X_AT 224377_S_AT 224662_AT 227116_AT 227728_AT 231718_AT 49878_AT 52169_AT 1557562_AT 1559006_AT 1570441_AT 207092_AT 207495_AT 215384_S_AT 215402_AT 232049_AT 234…
GO:BP	cellular response to stress	GO:0033554	false	0.00650815	2.18654	1770	574	81	21031	1554078_S_AT 1554390_S_AT 1559946_S_AT 1568763_S_AT 200679_X_AT 200942_S_AT 200970_S_AT 201039_S_AT 201091_S_AT 201223_S_AT 201384_S_AT 201518_AT 201626_AT 201678_S_AT 201898_S_AT 201930_AT 202724_S_AT 202897_AT 204132_S_AT 204484_AT 204838_S_AT 205178_S_AT 205681_AT 206074_S_AT 207812_S_AT 208003_S_AT 208442_S_AT 208808_S_AT 208864_S_AT 208946_S_AT 209049_S_AT 209217_S_AT 209348_S_AT 211989_AT 2…
GO:BP	regulation of catabolic process	GO:0009894	false	0.0075015	2.12485	1026	574	54	21031	1553678_A_AT 200679_X_AT 201039_S_AT 201223_S_AT 201280_S_AT 201369_S_AT 201637_S_AT 201699_AT 201879_AT 201971_S_AT 202163_S_AT 202704_AT 202724_S_AT 203534_AT 204132_S_AT 204837_AT 206170_AT 208442_S_AT 208946_S_AT 209217_S_AT 209330_S_AT 213746_S_AT 214273_X_AT 218030_AT 223132_S_AT 224652_AT 225123_AT 225387_AT 225813_AT 225892_AT 226843_S_AT 227277_AT 227366_AT 229943_AT 234950_S_AT 1553989_…
GO:BP	positive regulation of cellular biosynthetic process	GO:0031328	false	0.00973251	2.01178	2685	574	111	21031	1554390_S_AT 1555756_A_AT 1559078_AT 1559946_S_AT 200679_X_AT 200970_S_AT 201138_S_AT 201218_AT 201280_S_AT 201327_S_AT 201483_S_AT 201637_S_AT 201678_S_AT 201699_AT 202060_AT 202171_AT 202425_X_AT 202460_S_AT 202657_S_AT 202704_AT 202724_S_AT 203076_S_AT 203250_AT 203497_AT 203693_S_AT 204132_S_AT 205690_S_AT 206074_S_AT 206170_AT 206445_S_AT 207655_S_AT 208003_S_AT 208442_S_AT 208691_AT 208808_…
GO:BP	ATP biosynthetic process	GO:0006754	false	0.0098346	2.00724	102	574	13	21031	1553575_AT 201304_AT 201757_AT 201971_S_AT 202001_S_AT 202279_AT 202298_AT 202325_S_AT 203371_S_AT 207335_X_AT 208972_S_AT 218201_AT 1556064_AT
GO:BP	proteolysis involved in protein catabolic process	GO:0051603	false	0.0117007	1.93179	730	574	42	21031	1554868_S_AT 1569594_A_AT 201039_S_AT 201223_S_AT 201280_S_AT 201699_AT 201879_AT 201898_S_AT 202824_S_AT 205178_S_AT 208924_AT 209150_S_AT 212155_AT 217750_S_AT 218178_S_AT 218671_S_AT 219402_S_AT 222436_S_AT 225422_AT 225813_AT 226917_S_AT 229467_AT 229943_AT 234950_S_AT 235199_AT 45828_AT 1555330_AT 1559214_AT 1570251_AT 209334_S_AT 210867_AT 211444_AT 215384_S_AT 215402_AT 228942_S_AT 231269_…
GO:BP	sister chromatid segregation	GO:0000819	false	0.0132401	1.87811	230	574	20	21031	203087_S_AT 208442_S_AT 208946_S_AT 209150_S_AT 211989_AT 212132_AT 212264_S_AT 213251_AT 213746_S_AT 218178_S_AT 222436_S_AT 222479_S_AT 222737_S_AT 226917_S_AT 231848_X_AT 1557502_AT 228323_AT 235572_AT 236442_AT 236505_AT
GO:BP	post-translational protein modification	GO:0043687	false	0.013803	1.86003	1021	574	53	21031	1554078_S_AT 1554868_S_AT 1559078_AT 1568763_S_AT 201363_S_AT 201713_S_AT 201879_AT 201898_S_AT 202138_X_AT 202824_S_AT 203497_AT 205178_S_AT 208924_AT 210538_S_AT 212124_AT 212155_AT 215012_AT 217750_S_AT 218050_AT 218386_X_AT 219242_AT 219402_S_AT 223132_S_AT 224747_AT 224793_S_AT 225422_AT 225813_AT 225925_S_AT 226119_AT 226505_X_AT 226845_S_AT 226917_S_AT 229943_AT 234950_S_AT 235199_AT 23522…
GO:BP	nuclear transport	GO:0051169	false	0.0138833	1.85751	334	574	25	21031	1569594_A_AT 201138_S_AT 201713_S_AT 202097_AT 202425_X_AT 203497_AT 203519_S_AT 203693_S_AT 208864_S_AT 213746_S_AT 215936_S_AT 218050_AT 218482_AT 224068_X_AT 225107_AT 227728_AT 52169_AT 1555068_AT 1559006_AT 1559214_AT 1562110_AT 206921_AT 207092_AT 236505_AT 244030_AT
GO:BP	nucleocytoplasmic transport	GO:0006913	false	0.0138833	1.85751	334	574	25	21031	1569594_A_AT 201138_S_AT 201713_S_AT 202097_AT 202425_X_AT 203497_AT 203519_S_AT 203693_S_AT 208864_S_AT 213746_S_AT 215936_S_AT 218050_AT 218482_AT 224068_X_AT 225107_AT 227728_AT 52169_AT 1555068_AT 1559006_AT 1559214_AT 1562110_AT 206921_AT 207092_AT 236505_AT 244030_AT
GO:BP	positive regulation of biosynthetic process	GO:0009891	false	0.0139317	1.856	2706	574	111	21031	1554390_S_AT 1555756_A_AT 1559078_AT 1559946_S_AT 200679_X_AT 200970_S_AT 201138_S_AT 201218_AT 201280_S_AT 201327_S_AT 201483_S_AT 201637_S_AT 201678_S_AT 201699_AT 202060_AT 202171_AT 202425_X_AT 202460_S_AT 202657_S_AT 202704_AT 202724_S_AT 203076_S_AT 203250_AT 203497_AT 203693_S_AT 204132_S_AT 205690_S_AT 206074_S_AT 206170_AT 206445_S_AT 207655_S_AT 208003_S_AT 208442_S_AT 208691_AT 208808_…
GO:BP	proteasome-mediated ubiquitin-dependent protein catabolic process	GO:0043161	false	0.0139524	1.85535	400	574	28	21031	1554868_S_AT 1569594_A_AT 201039_S_AT 201223_S_AT 201280_S_AT 201699_AT 201879_AT 201898_S_AT 212155_AT 219402_S_AT 225422_AT 226917_S_AT 229467_AT 229943_AT 234950_S_AT 45828_AT 1555330_AT 1559214_AT 1570251_AT 211444_AT 215384_S_AT 215402_AT 231269_AT 232365_AT 236122_AT 238425_AT 241887_AT 244030_AT
GO:BP	electron transport chain	GO:0022900	false	0.0153934	1.81266	175	574	17	21031	1553575_AT 201304_AT 201568_AT 201754_AT 201757_AT 202001_S_AT 202110_AT 202233_S_AT 202298_AT 203371_S_AT 205849_S_AT 209095_AT 213846_AT 214259_S_AT 218201_AT 223281_S_AT 237121_AT
GO:BP	RNA localization	GO:0006403	false	0.0195674	1.70847	197	574	18	21031	1559946_S_AT 201138_S_AT 201327_S_AT 201713_S_AT 202097_AT 203519_S_AT 208442_S_AT 208863_S_AT 217872_AT 218482_AT 225107_AT 56256_AT 1555068_AT 1559006_AT 1562110_AT 206921_AT 209662_AT 236505_AT
GO:BP	purine nucleotide biosynthetic process	GO:0006164	false	0.020458	1.68914	257	574	21	21031	1553575_AT 201304_AT 201757_AT 201971_S_AT 202001_S_AT 202279_AT 202298_AT 202325_S_AT 203302_AT 203371_S_AT 203741_S_AT 204639_AT 207335_X_AT 208972_S_AT 209095_AT 218201_AT 221751_AT 239798_AT 1556064_AT 204348_S_AT 238856_S_AT
GO:BP	nucleoside triphosphate biosynthetic process	GO:0009142	false	0.0236558	1.62606	127	574	14	21031	1553575_AT 201304_AT 201757_AT 201971_S_AT 202001_S_AT 202279_AT 202298_AT 202325_S_AT 203371_S_AT 207335_X_AT 208972_S_AT 218201_AT 1556064_AT 204348_S_AT
GO:BP	positive regulation of lymphocyte activation	GO:0051251	true	0.0240472	1.61894	323	574	24	21031	1554078_S_AT 1555756_A_AT 200679_X_AT 201678_S_AT 202425_X_AT 202897_AT 204132_S_AT 204639_AT 205671_S_AT 208691_AT 210776_X_AT 211989_AT 212124_AT 218852_AT 222737_S_AT 222826_AT 232843_S_AT 1554306_AT 1554519_AT 202932_AT 207092_AT 217263_X_AT 239796_X_AT 241716_AT
GO:BP	positive regulation of cell activation	GO:0050867	false	0.0293115	1.53296	371	574	26	21031	1554078_S_AT 1555756_A_AT 200679_X_AT 201678_S_AT 202425_X_AT 202897_AT 204132_S_AT 204639_AT 205671_S_AT 208691_AT 210776_X_AT 211989_AT 212124_AT 213746_S_AT 218852_AT 222737_S_AT 222826_AT 232843_S_AT 1554306_AT 1554519_AT 202932_AT 207092_AT 211525_S_AT 217263_X_AT 239796_X_AT 241716_AT
GO:BP	negative regulation of nitrogen compound metabolic process	GO:0051172	false	0.0301448	1.52079	2202	574	93	21031	1552701_A_AT 1554021_A_AT 1554078_S_AT 1559078_AT 1559946_S_AT 200679_X_AT 200942_S_AT 201091_S_AT 201218_AT 201280_S_AT 201300_S_AT 201363_S_AT 201483_S_AT 201518_AT 201637_S_AT 202060_AT 202428_X_AT 202704_AT 202724_S_AT 202897_AT 203076_S_AT 203250_AT 203497_AT 204132_S_AT 206074_S_AT 206095_S_AT 208442_S_AT 208808_S_AT 208864_S_AT 209014_AT 209049_S_AT 209285_S_AT 209330_S_AT 209348_S_AT 2107…
GO:BP	transcription by RNA polymerase II	GO:0006366	false	0.0302508	1.51926	2691	574	109	21031	1553979_AT 1554021_A_AT 1554078_S_AT 1554390_S_AT 1559078_AT 1559946_S_AT 200050_AT 200679_X_AT 200942_S_AT 201091_S_AT 201218_AT 201280_S_AT 201483_S_AT 201518_AT 201699_AT 202060_AT 202171_AT 202425_X_AT 202460_S_AT 202724_S_AT 202824_S_AT 203076_S_AT 203250_AT 203497_AT 203693_S_AT 204132_S_AT 205594_AT 205690_S_AT 206074_S_AT 206170_AT 206829_X_AT 208003_S_AT 208066_S_AT 208442_S_AT 208808_S_…
GO:BP	purine ribonucleoside triphosphate biosynthetic process	GO:0009206	false	0.0307179	1.51261	113	574	13	21031	1553575_AT 201304_AT 201757_AT 201971_S_AT 202001_S_AT 202279_AT 202298_AT 202325_S_AT 203371_S_AT 207335_X_AT 208972_S_AT 218201_AT 1556064_AT
GO:BP	cellular respiration	GO:0045333	false	0.031869	1.49663	244	574	20	21031	1553575_AT 201304_AT 201568_AT 201754_AT 201757_AT 202001_S_AT 202110_AT 202233_S_AT 202298_AT 202325_S_AT 203371_S_AT 205849_S_AT 207335_X_AT 209095_AT 213846_AT 218201_AT 223281_S_AT 225892_AT 204348_S_AT 238856_S_AT
GO:BP	purine nucleoside triphosphate biosynthetic process	GO:0009145	false	0.0338217	1.4708	114	574	13	21031	1553575_AT 201304_AT 201757_AT 201971_S_AT 202001_S_AT 202279_AT 202298_AT 202325_S_AT 203371_S_AT 207335_X_AT 208972_S_AT 218201_AT 1556064_AT
GO:BP	purine-containing compound biosynthetic process	GO:0072522	false	0.034565	1.46136	266	574	21	21031	1553575_AT 201304_AT 201757_AT 201971_S_AT 202001_S_AT 202279_AT 202298_AT 202325_S_AT 203302_AT 203371_S_AT 203741_S_AT 204639_AT 207335_X_AT 208972_S_AT 209095_AT 218201_AT 221751_AT 239798_AT 1556064_AT 204348_S_AT 238856_S_AT
GO:BP	regulation of cellular component organization	GO:0051128	false	0.0361948	1.44135	2425	574	100	21031	1553678_A_AT 1554390_S_AT 1555756_A_AT 1559078_AT 1559946_S_AT 200679_X_AT 201280_S_AT 201300_S_AT 201327_S_AT 201637_S_AT 201699_AT 202146_AT 202425_X_AT 202657_S_AT 202897_AT 203250_AT 203474_AT 206170_AT 206875_S_AT 208442_S_AT 208691_AT 208728_S_AT 208946_S_AT 209049_S_AT 209150_S_AT 209217_S_AT 209285_S_AT 209330_S_AT 210276_S_AT 210312_S_AT 210962_S_AT 211986_AT 211989_AT 212264_S_AT 213251…
GO:BP	macromolecule catabolic process	GO:0009057	false	0.0397215	1.40097	1338	574	63	21031	1554868_S_AT 1569594_A_AT 201039_S_AT 201138_S_AT 201223_S_AT 201280_S_AT 201369_S_AT 201637_S_AT 201699_AT 201879_AT 201898_S_AT 202163_S_AT 202292_X_AT 202704_AT 202724_S_AT 202824_S_AT 203519_S_AT 203534_AT 205178_S_AT 208442_S_AT 208924_AT 208946_S_AT 209150_S_AT 209330_S_AT 211747_S_AT 212155_AT 213746_S_AT 217750_S_AT 218178_S_AT 218671_S_AT 219402_S_AT 222436_S_AT 225387_AT 225422_AT 22581…
GO:BP	catabolic process	GO:0009056	false	0.0415273	1.38167	2556	574	104	21031	1553678_A_AT 1554868_S_AT 1569594_A_AT 200679_X_AT 201039_S_AT 201138_S_AT 201223_S_AT 201280_S_AT 201369_S_AT 201384_S_AT 201637_S_AT 201699_AT 201879_AT 201898_S_AT 201971_S_AT 202163_S_AT 202292_X_AT 202460_S_AT 202704_AT 202724_S_AT 202824_S_AT 202888_S_AT 203519_S_AT 203534_AT 204132_S_AT 204484_AT 204639_AT 204837_AT 205178_S_AT 206170_AT 208442_S_AT 208924_AT 208935_S_AT 208946_S_AT 209095…
GO:BP	chromosome segregation	GO:0007059	true	0.0427635	1.36893	425	574	28	21031	1554390_S_AT 203087_S_AT 204838_S_AT 208066_S_AT 208442_S_AT 208728_S_AT 208946_S_AT 209150_S_AT 211989_AT 212132_AT 212264_S_AT 213251_AT 213746_S_AT 218178_S_AT 219242_AT 222436_S_AT 222479_S_AT 222737_S_AT 226917_S_AT 231848_X_AT 1557502_AT 228323_AT 228559_AT 235572_AT 236442_AT 236505_AT 236957_AT 244389_AT
GO:BP	mitotic cell cycle process	GO:1903047	true	0.0433709	1.3628	745	574	41	21031	1553678_A_AT 201369_S_AT 201898_S_AT 201930_AT 202425_X_AT 202770_S_AT 203087_S_AT 203474_AT 203693_S_AT 208442_S_AT 208728_S_AT 208946_S_AT 209150_S_AT 210776_X_AT 211989_AT 212132_AT 212264_S_AT 212415_AT 213251_AT 213746_S_AT 218007_S_AT 218178_S_AT 218386_X_AT 221711_S_AT 222436_S_AT 222479_S_AT 222737_S_AT 223133_AT 224652_AT 226917_S_AT 231848_X_AT 1555068_AT 1557502_AT 205288_AT 207851_S_A…
GO:BP	protein-containing complex disassembly	GO:0032984	true	0.0454123	1.34283	250	574	20	21031	203087_S_AT 203250_AT 206074_S_AT 206170_AT 208946_S_AT 209150_S_AT 210276_S_AT 211989_AT 218178_S_AT 222065_S_AT 222436_S_AT 222708_S_AT 224662_AT 1555068_AT 1570441_AT 205506_AT 207851_S_AT 215384_S_AT 241374_AT 242316_AT
GO:CC	cytoplasm	GO:0005737	true	4.22963e-24	23.3737	12345	594	455	22097	1552701_A_AT 1553575_AT 1553678_A_AT 1554078_S_AT 1554390_S_AT 1555756_A_AT 1559078_AT 1559946_S_AT 1568763_S_AT 1569594_A_AT 200050_AT 200679_X_AT 200942_S_AT 200970_S_AT 201039_S_AT 201138_S_AT 201175_AT 201218_AT 201223_S_AT 201266_AT 201280_S_AT 201300_S_AT 201304_AT 201327_S_AT 201363_S_AT 201369_S_AT 201376_S_AT 201384_S_AT 201408_AT 201568_AT 201569_S_AT 201595_S_AT 201626_AT 201637_S_AT 2…
GO:CC	membrane-bounded organelle	GO:0043227	false	2.71402e-18	17.5664	15671	594	516	22097	1553575_AT 1553678_A_AT 1553979_AT 1554021_A_AT 1554078_S_AT 1554390_S_AT 1554868_S_AT 1559078_AT 1559946_S_AT 1567214_A_AT 1568763_S_AT 1569594_A_AT 200050_AT 200679_X_AT 200942_S_AT 200970_S_AT 201039_S_AT 201091_S_AT 201138_S_AT 201175_AT 201218_AT 201223_S_AT 201266_AT 201280_S_AT 201300_S_AT 201304_AT 201327_S_AT 201363_S_AT 201369_S_AT 201376_S_AT 201384_S_AT 201408_AT 201483_S_AT 201518_AT…
GO:CC	nucleoplasm	GO:0005654	false	4.76256e-18	17.3222	4220	594	208	22097	1554021_A_AT 1554868_S_AT 1559078_AT 1559946_S_AT 1567214_A_AT 1568763_S_AT 200679_X_AT 200942_S_AT 201039_S_AT 201091_S_AT 201223_S_AT 201266_AT 201363_S_AT 201376_S_AT 201384_S_AT 201408_AT 201483_S_AT 201518_AT 201687_S_AT 201699_AT 201713_S_AT 201879_AT 201898_S_AT 201930_AT 201971_S_AT 202041_S_AT 202060_AT 202097_AT 202171_AT 202209_AT 202292_X_AT 202425_X_AT 202657_S_AT 202724_S_AT 202776_…
GO:CC	intracellular membrane-bounded organelle	GO:0043231	false	7.00703e-18	17.1545	14605	594	492	22097	1553575_AT 1553678_A_AT 1553979_AT 1554021_A_AT 1554078_S_AT 1554390_S_AT 1554868_S_AT 1559078_AT 1559946_S_AT 1567214_A_AT 1568763_S_AT 1569594_A_AT 200050_AT 200679_X_AT 200942_S_AT 200970_S_AT 201039_S_AT 201091_S_AT 201138_S_AT 201175_AT 201218_AT 201223_S_AT 201266_AT 201280_S_AT 201300_S_AT 201304_AT 201363_S_AT 201369_S_AT 201376_S_AT 201384_S_AT 201408_AT 201483_S_AT 201518_AT 201568_AT 2…
GO:CC	organelle	GO:0043226	false	1.3477e-14	13.8704	16808	594	531	22097	1553575_AT 1553678_A_AT 1553979_AT 1554021_A_AT 1554078_S_AT 1554390_S_AT 1554868_S_AT 1559078_AT 1559946_S_AT 1567214_A_AT 1568763_S_AT 1569594_A_AT 200050_AT 200679_X_AT 200942_S_AT 200970_S_AT 201039_S_AT 201091_S_AT 201138_S_AT 201175_AT 201218_AT 201223_S_AT 201266_AT 201280_S_AT 201300_S_AT 201304_AT 201327_S_AT 201363_S_AT 201369_S_AT 201376_S_AT 201384_S_AT 201408_AT 201483_S_AT 201518_AT…
GO:CC	cytosol	GO:0005829	false	2.84122e-14	13.5465	5487	594	238	22097	1552701_A_AT 1554078_S_AT 1554390_S_AT 1559078_AT 1559946_S_AT 1568763_S_AT 1569594_A_AT 200050_AT 200942_S_AT 200970_S_AT 201039_S_AT 201138_S_AT 201218_AT 201223_S_AT 201266_AT 201280_S_AT 201300_S_AT 201327_S_AT 201363_S_AT 201376_S_AT 201384_S_AT 201408_AT 201595_S_AT 201637_S_AT 201699_AT 201713_S_AT 201879_AT 201898_S_AT 201971_S_AT 202097_AT 202138_X_AT 202163_S_AT 202209_AT 202292_X_AT 20…
GO:CC	intracellular organelle	GO:0043229	false	1.38286e-13	12.8592	16018	594	512	22097	1553575_AT 1553678_A_AT 1553979_AT 1554021_A_AT 1554078_S_AT 1554390_S_AT 1554868_S_AT 1559078_AT 1559946_S_AT 1567214_A_AT 1568763_S_AT 1569594_A_AT 200050_AT 200679_X_AT 200942_S_AT 200970_S_AT 201039_S_AT 201091_S_AT 201138_S_AT 201175_AT 201218_AT 201223_S_AT 201266_AT 201280_S_AT 201300_S_AT 201304_AT 201327_S_AT 201363_S_AT 201369_S_AT 201376_S_AT 201384_S_AT 201408_AT 201483_S_AT 201518_AT…
GO:CC	catalytic complex	GO:1902494	false	1.20887e-12	11.9176	1776	594	106	22097	1553575_AT 1559078_AT 1559946_S_AT 1567214_A_AT 1568763_S_AT 201039_S_AT 201223_S_AT 201304_AT 201376_S_AT 201408_AT 201568_AT 201699_AT 201713_S_AT 201754_AT 201757_AT 201879_AT 201898_S_AT 201971_S_AT 202001_S_AT 202060_AT 202110_AT 202138_X_AT 202209_AT 202233_S_AT 202279_AT 202298_AT 202325_S_AT 202425_X_AT 202673_AT 202770_S_AT 202824_S_AT 203316_S_AT 203371_S_AT 203497_AT 204484_AT 205644_S…
GO:CC	membrane-enclosed lumen	GO:0031974	false	2.77488e-12	11.5568	6657	594	267	22097	1554021_A_AT 1554078_S_AT 1554390_S_AT 1554868_S_AT 1559078_AT 1559946_S_AT 1567214_A_AT 1568763_S_AT 200050_AT 200679_X_AT 200942_S_AT 201039_S_AT 201091_S_AT 201223_S_AT 201266_AT 201280_S_AT 201363_S_AT 201376_S_AT 201384_S_AT 201408_AT 201483_S_AT 201518_AT 201637_S_AT 201687_S_AT 201699_AT 201713_S_AT 201757_AT 201879_AT 201898_S_AT 201930_AT 201971_S_AT 202041_S_AT 202060_AT 202097_AT 20217…
GO:CC	organelle lumen	GO:0043233	false	2.77488e-12	11.5568	6657	594	267	22097	1554021_A_AT 1554078_S_AT 1554390_S_AT 1554868_S_AT 1559078_AT 1559946_S_AT 1567214_A_AT 1568763_S_AT 200050_AT 200679_X_AT 200942_S_AT 201039_S_AT 201091_S_AT 201223_S_AT 201266_AT 201280_S_AT 201363_S_AT 201376_S_AT 201384_S_AT 201408_AT 201483_S_AT 201518_AT 201637_S_AT 201687_S_AT 201699_AT 201713_S_AT 201757_AT 201879_AT 201898_S_AT 201930_AT 201971_S_AT 202041_S_AT 202060_AT 202097_AT 20217…
GO:CC	intracellular organelle lumen	GO:0070013	false	2.77488e-12	11.5568	6657	594	267	22097	1554021_A_AT 1554078_S_AT 1554390_S_AT 1554868_S_AT 1559078_AT 1559946_S_AT 1567214_A_AT 1568763_S_AT 200050_AT 200679_X_AT 200942_S_AT 201039_S_AT 201091_S_AT 201223_S_AT 201266_AT 201280_S_AT 201363_S_AT 201376_S_AT 201384_S_AT 201408_AT 201483_S_AT 201518_AT 201637_S_AT 201687_S_AT 201699_AT 201713_S_AT 201757_AT 201879_AT 201898_S_AT 201930_AT 201971_S_AT 202041_S_AT 202060_AT 202097_AT 20217…
GO:CC	intracellular anatomical structure	GO:0005622	false	3.15515e-12	11.501	17834	594	546	22097	1552701_A_AT 1553575_AT 1553678_A_AT 1553979_AT 1554021_A_AT 1554078_S_AT 1554390_S_AT 1554868_S_AT 1555756_A_AT 1559078_AT 1559946_S_AT 1567214_A_AT 1568763_S_AT 1569594_A_AT 200050_AT 200679_X_AT 200942_S_AT 200970_S_AT 201039_S_AT 201091_S_AT 201138_S_AT 201175_AT 201218_AT 201223_S_AT 201266_AT 201280_S_AT 201300_S_AT 201304_AT 201327_S_AT 201363_S_AT 201369_S_AT 201376_S_AT 201384_S_AT 20140…
GO:CC	nuclear lumen	GO:0031981	false	1.63428e-11	10.7867	5521	594	230	22097	1554021_A_AT 1554868_S_AT 1559078_AT 1559946_S_AT 1567214_A_AT 1568763_S_AT 200050_AT 200679_X_AT 200942_S_AT 201039_S_AT 201091_S_AT 201223_S_AT 201266_AT 201280_S_AT 201363_S_AT 201376_S_AT 201384_S_AT 201408_AT 201483_S_AT 201518_AT 201637_S_AT 201687_S_AT 201699_AT 201713_S_AT 201879_AT 201898_S_AT 201930_AT 201971_S_AT 202041_S_AT 202060_AT 202097_AT 202171_AT 202209_AT 202292_X_AT 202425_X_…
GO:CC	organelle membrane	GO:0031090	false	3.35463e-08	7.47436	3770	594	163	22097	1553575_AT 1553678_A_AT 1568763_S_AT 200970_S_AT 201091_S_AT 201175_AT 201280_S_AT 201300_S_AT 201304_AT 201384_S_AT 201568_AT 201569_S_AT 201626_AT 201713_S_AT 201754_AT 201757_AT 201917_S_AT 201971_S_AT 202001_S_AT 202097_AT 202110_AT 202233_S_AT 202279_AT 202298_AT 202325_S_AT 202460_S_AT 202673_AT 202798_AT 202888_S_AT 202897_AT 202918_S_AT 203371_S_AT 203474_AT 203781_AT 204132_S_AT 204396_S…
GO:CC	mitochondrion	GO:0005739	false	4.59335e-07	6.33787	1689	594	88	22097	1553575_AT 1554078_S_AT 201175_AT 201266_AT 201304_AT 201384_S_AT 201568_AT 201569_S_AT 201754_AT 201757_AT 201917_S_AT 202001_S_AT 202041_S_AT 202110_AT 202233_S_AT 202279_AT 202298_AT 202325_S_AT 202425_X_AT 202724_S_AT 203302_AT 203371_S_AT 203781_AT 204132_S_AT 205133_S_AT 205681_AT 205849_S_AT 207335_X_AT 208946_S_AT 208972_S_AT 209095_AT 209623_AT 212591_AT 212603_AT 213396_S_AT 213846_AT 2…
GO:CC	mitochondrial protein-containing complex	GO:0098798	false	1.59493e-06	5.79726	306	594	29	22097	1553575_AT 201304_AT 201568_AT 201569_S_AT 201754_AT 201757_AT 202001_S_AT 202110_AT 202233_S_AT 202279_AT 202298_AT 202325_S_AT 203371_S_AT 203781_AT 205849_S_AT 207335_X_AT 208972_S_AT 209095_AT 209623_AT 212603_AT 213846_AT 218201_AT 218357_S_AT 222997_S_AT 223480_S_AT 224671_AT 225260_S_AT 239798_AT 45828_AT
GO:CC	envelope	GO:0031975	false	7.32909e-06	5.13495	1299	594	70	22097	1553575_AT 201091_S_AT 201175_AT 201300_S_AT 201304_AT 201384_S_AT 201568_AT 201569_S_AT 201637_S_AT 201713_S_AT 201754_AT 201757_AT 201917_S_AT 202001_S_AT 202097_AT 202110_AT 202233_S_AT 202279_AT 202298_AT 202325_S_AT 203371_S_AT 203675_AT 203781_AT 204132_S_AT 204396_S_AT 205681_AT 205849_S_AT 207335_X_AT 208946_S_AT 208972_S_AT 209150_S_AT 212603_AT 213846_AT 217772_S_AT 218178_S_AT 218201_A…
GO:CC	organelle envelope	GO:0031967	false	7.32909e-06	5.13495	1299	594	70	22097	1553575_AT 201091_S_AT 201175_AT 201300_S_AT 201304_AT 201384_S_AT 201568_AT 201569_S_AT 201637_S_AT 201713_S_AT 201754_AT 201757_AT 201917_S_AT 202001_S_AT 202097_AT 202110_AT 202233_S_AT 202279_AT 202298_AT 202325_S_AT 203371_S_AT 203675_AT 203781_AT 204132_S_AT 204396_S_AT 205681_AT 205849_S_AT 207335_X_AT 208946_S_AT 208972_S_AT 209150_S_AT 212603_AT 213846_AT 217772_S_AT 218178_S_AT 218201_A…
GO:CC	mitochondrial respirasome	GO:0005746	false	1.33962e-05	4.87302	96	594	15	22097	1553575_AT 201304_AT 201568_AT 201754_AT 201757_AT 202001_S_AT 202110_AT 202233_S_AT 202298_AT 203371_S_AT 205849_S_AT 213846_AT 218201_AT 223281_S_AT 45828_AT
GO:CC	inner mitochondrial membrane protein complex	GO:0098800	false	2.629e-05	4.58021	162	594	19	22097	1553575_AT 201304_AT 201568_AT 201569_S_AT 201754_AT 201757_AT 202001_S_AT 202110_AT 202233_S_AT 202279_AT 202298_AT 202325_S_AT 203371_S_AT 205849_S_AT 207335_X_AT 208972_S_AT 213846_AT 218201_AT 45828_AT
GO:CC	respirasome	GO:0070469	false	4.00836e-05	4.39703	104	594	15	22097	1553575_AT 201304_AT 201568_AT 201754_AT 201757_AT 202001_S_AT 202110_AT 202233_S_AT 202298_AT 203371_S_AT 205849_S_AT 213846_AT 218201_AT 223281_S_AT 45828_AT
GO:CC	respiratory chain complex	GO:0098803	false	6.11715e-05	4.21345	93	594	14	22097	1553575_AT 201304_AT 201568_AT 201754_AT 201757_AT 202001_S_AT 202110_AT 202233_S_AT 202298_AT 203371_S_AT 205849_S_AT 213846_AT 218201_AT 45828_AT
GO:CC	mitochondrial inner membrane	GO:0005743	false	0.000165643	3.78083	512	594	35	22097	1553575_AT 201304_AT 201568_AT 201569_S_AT 201754_AT 201757_AT 201917_S_AT 202001_S_AT 202110_AT 202233_S_AT 202279_AT 202298_AT 202325_S_AT 203371_S_AT 203781_AT 205849_S_AT 207335_X_AT 208972_S_AT 212603_AT 213846_AT 218201_AT 218357_S_AT 220094_S_AT 222997_S_AT 223157_AT 223281_S_AT 223480_S_AT 224671_AT 225260_S_AT 226006_AT 45828_AT 1563708_AT 230457_AT 232245_AT 241716_AT
GO:CC	nucleus	GO:0005634	false	0.000381363	3.41866	10074	594	328	22097	1553979_AT 1554021_A_AT 1554078_S_AT 1554390_S_AT 1554868_S_AT 1559078_AT 1559946_S_AT 1567214_A_AT 1568763_S_AT 1569594_A_AT 200050_AT 200679_X_AT 200942_S_AT 201039_S_AT 201091_S_AT 201138_S_AT 201218_AT 201223_S_AT 201266_AT 201280_S_AT 201300_S_AT 201363_S_AT 201369_S_AT 201376_S_AT 201384_S_AT 201408_AT 201483_S_AT 201518_AT 201595_S_AT 201637_S_AT 201687_S_AT 201699_AT 201713_S_AT 201879_AT…
[truncated: 516 more rows]

## Sheet: GSE25507_0,05
source	term_name	term_id	highlighted	adjusted_p_value	negative_log10_of_adjusted_p_value	term_size	query_size	intersection_size	effective_domain_size	intersections
[truncated: 6 more rows]

## Sheet: GSE25507_0,01
source	term_name	term_id	highlighted	adjusted_p_value	negative_log10_of_adjusted_p_value	term_size	query_size	intersection_size	effective_domain_size	intersections
[truncated: 10 more rows]

[truncated: 32 more sheets: GSE17612_0,05, GSE17612_0,01, GSE62333_0,05, GSE62333_0,01, GSE5389_0,05, GSE5389_0,01, GSE7036_0,05, GSE7036_0,01, GSE12654_SCH_0,05, GSE12654_SCH_0,01, GSE12654_BD_0,05, GSE12654_BD_0,01, GSE12654_MDD_0,05, GSE12654_MDD_0,01, GSE53987_HPC_SCH_0,05, GSE53987_HPC_SCH_0,01, GSE53987_HPC_BD_0,05, GSE53987_HPC_BD_0,01, GSE53987_HPC_MDD_0,05, GSE53987_HPC_MDD_0,01 …]
